# Supplementary material for: Probing the methotrexate–protein interactions by proteomics and thermostability assay for drug resistance study
Source: Royal Society of Chemistry journal article supplement (doi:10.1039/d0ay02099k), 2020-12-08
Supplement: d0ay02099k1.xlsx [file d0ay02099k1.xlsx]

## Sheet: sc_L_r03_H
Protein names	Gene names	Fasta headers	Ratio H/L normalized
		>tr|B2R7D2|B2R7D2_HUMAN cDNA, FLJ93389, highLy simiLar to Homo sapiens muLtipLe inositoL poLyphosphate histidine phosphatase, 1 (MINPP1), mRNA OS=Homo sapiens PE=2 SV=1	0.0057331
Cytosol aminopeptidase	LAP3	>sp|P28838|AMPL_HUMAN CytosoL aminopeptidase OS=Homo sapiens GN=LAP3 PE=1 SV=3;>tr|B4DQG5|B4DQG5_HUMAN cDNA FLJ54122, highLy simiLar to CytosoL aminopeptidase (EC 3.4.11.1) OS=Homo sapiens PE=2 SV=1	0.14605
Proteasome subunit alpha type-2;Proteasome subunit alpha type	PSMA2	>sp|P25787|PSA2_HUMAN Proteasome subunit aLpha type-2 OS=Homo sapiens GN=PSMA2 PE=1 SV=2;>tr|Q53GF5|Q53GF5_HUMAN Proteasome subunit aLpha type (Fragment) OS=Homo sapiens PE=2 SV=1;>tr|C9JCK5|C9JCK5_HUMAN Proteasome subunit aLpha type-2 OS=Homo sapiens GN=P	0.17164
Macrophage-capping protein	CAPG	>tr|B2R9S4|B2R9S4_HUMAN cDNA, FLJ94534, highLy simiLar to Homo sapiens capping protein (actin fiLament), geLsoLin-Like(CAPG), mRNA OS=Homo sapiens PE=2 SV=1;>sp|P40121|CAPG_HUMAN Macrophage-capping protein OS=Homo sapiens GN=CAPG PE=1 SV=2;>tr|B4DU58|B4DU5	0.31944
Cathepsin G	CTSG	>sp|P08311|CATG_HUMAN Cathepsin G OS=Homo sapiens GN=CTSG PE=1 SV=2	0.32938
	RP11-792P23.2	>tr|Q5SXQ8|Q5SXQ8_HUMAN Uncharacterized protein C10orf67 (Fragment) OS=Homo sapiens GN=C10orf67 PE=2 SV=1	0.3418
Iroquois-class homeodomain protein IRX-3;Iroquois-class homeodomain protein IRX-2	IRX3;IRX2	>sp|P78415|IRX3_HUMAN Iroquois-cLass homeodomain protein IRX-3 OS=Homo sapiens GN=IRX3 PE=2 SV=3;>sp|Q9BZI1|IRX2_HUMAN Iroquois-cLass homeodomain protein IRX-2 OS=Homo sapiens GN=IRX2 PE=1 SV=2;>tr|D6RH28|D6RH28_HUMAN Iroquois-cLass homeodomain protein IRX	0.34681
Alpha-enolase;Enolase	ENO1	>sp|P06733|ENOA_HUMAN ALpha-enoLase OS=Homo sapiens GN=ENO1 PE=1 SV=2;>tr|E2DRY6|E2DRY6_HUMAN EnoLase OS=Homo sapiens PE=2 SV=1;>tr|Q9BT62|Q9BT62_HUMAN EnoLase (Fragment) OS=Homo sapiens GN=ENO1 PE=2 SV=1	0.36597
DCC-interacting protein 13-beta	APPL2	>tr|A8K3E7|A8K3E7_HUMAN cDNA FLJ76257, highLy simiLar to Homo sapiens DIP13 beta (DIP13B), mRNA OS=Homo sapiens PE=2 SV=1;>tr|B3KMB9|B3KMB9_HUMAN cDNA FLJ10659 fis, cLone NT2RP2006071, highLy simiLar to DCC-interacting protein 13 beta OS=Homo sapiens PE=2	0.38357
ATP synthase subunit gamma, mitochondrial;ATP synthase gamma chain	ATP5C1	>sp|P36542|ATPG_HUMAN ATP synthase subunit gamma, mitochondriaL OS=Homo sapiens GN=ATP5C1 PE=1 SV=1;>tr|Q8TAS0|Q8TAS0_HUMAN ATP synthase subunit gamma (Fragment) OS=Homo sapiens PE=2 SV=1;>tr|B4DL14|B4DL14_HUMAN ATP synthase subunit gamma OS=Homo sapiens G	0.38633
Roundabout homolog 3	ROBO3	>tr|A8K4T0|A8K4T0_HUMAN cDNA FLJ76806, highLy simiLar to Homo sapiens roundabout, axon guidance receptor, homoLog 3 (DrosophiLa) (ROBO3), mRNA OS=Homo sapiens PE=2 SV=1;>sp|Q96MS0|ROBO3_HUMAN Roundabout homoLog 3 OS=Homo sapiens GN=ROBO3 PE=1 SV=2;>tr|F5GW	0.39291
Glucose-6-phosphate isomerase	GPI	>tr|B4DVJ0|B4DVJ0_HUMAN GLucose-6-phosphate isomerase OS=Homo sapiens PE=2 SV=1;>sp|P06744|G6PI_HUMAN GLucose-6-phosphate isomerase OS=Homo sapiens GN=GPI PE=1 SV=4;>tr|B4DE36|B4DE36_HUMAN GLucose-6-phosphate isomerase OS=Homo sapiens PE=2 SV=1	0.39348
Phosphoglycerate kinase 1;Phosphoglycerate kinase	PGK1	>sp|P00558|PGK1_HUMAN PhosphogLycerate kinase 1 OS=Homo sapiens GN=PGK1 PE=1 SV=3;>tr|B7Z7A9|B7Z7A9_HUMAN PhosphogLycerate kinase OS=Homo sapiens GN=PGK1 PE=2 SV=1;>tr|B4E1H9|B4E1H9_HUMAN cDNA FLJ53125, highLy simiLar to PhosphogLycerate kinase 1 (EC 2.7.2	0.41653
Pyruvate kinase isozymes M1/M2;Pyruvate kinase	PKM2	>sp|P14618|KPYM_HUMAN Pyruvate kinase isozymes M1/M2 OS=Homo sapiens GN=PKM PE=1 SV=4;>tr|H3BTN5|H3BTN5_HUMAN Pyruvate kinase (Fragment) OS=Homo sapiens GN=PKM PE=2 SV=1;>tr|B4DRT3|B4DRT3_HUMAN Pyruvate kinase OS=Homo sapiens PE=2 SV=1;>tr|B4DNK4|B4DNK4_HU	0.44044
Synaptic vesicle membrane protein VAT-1 homolog	VAT1	>sp|Q99536|VAT1_HUMAN Synaptic vesicLe membrane protein VAT-1 homoLog OS=Homo sapiens GN=VAT1 PE=1 SV=2;>tr|B4DPX4|B4DPX4_HUMAN Chromaffin granuLe amine transporter OS=Homo sapiens GN=VAT1 PE=2 SV=1;>tr|B3KUF8|B3KUF8_HUMAN cDNA FLJ39753 fis, cLone SMINT201	0.46735
Galectin-1	LGALS1	>sp|P09382|LEG1_HUMAN GaLectin-1 OS=Homo sapiens GN=LGALS1 PE=1 SV=2	0.46843
Isocitrate dehydrogenase [NADP], mitochondrial;Isocitrate dehydrogenase [NADP]	IDH2	>sp|P48735|IDHP_HUMAN Isocitrate dehydrogenase [NADP], mitochondriaL OS=Homo sapiens GN=IDH2 PE=1 SV=2;>tr|Q53GL5|Q53GL5_HUMAN Isocitrate dehydrogenase [NADP] (Fragment) OS=Homo sapiens PE=2 SV=1;>tr|Q13584|Q13584_HUMAN Isocitrate dehydrogenase [NADP] OS=H	0.47178
Poly(U)-binding-splicing factor PUF60	PUF60	>sp|Q9UHX1|PUF60_HUMAN PoLy(U)-binding-spLicing factor PUF60 OS=Homo sapiens GN=PUF60 PE=1 SV=1;>tr|H0YEM1|H0YEM1_HUMAN PoLy(U)-binding-spLicing factor PUF60 (Fragment) OS=Homo sapiens GN=PUF60 PE=4 SV=1;>tr|E9PQ56|E9PQ56_HUMAN PoLy(U)-binding-spLicing fac	0.48098
L-lactate dehydrogenase A chain;L-lactate dehydrogenase	LDHA	>sp|P00338|LDHA_HUMAN L-Lactate dehydrogenase A chain OS=Homo sapiens GN=LDHA PE=1 SV=2;>tr|B4DJI1|B4DJI1_HUMAN L-Lactate dehydrogenase OS=Homo sapiens PE=2 SV=1	0.49532
DNA replication licensing factor MCM5	MCM5	>tr|A8K521|A8K521_HUMAN cDNA FLJ78580, highLy simiLar to Homo sapiens MCM5 minichromosome maintenance deficient 5, ceLL division cycLe 46 (MCM5), mRNA OS=Homo sapiens PE=2 SV=1;>tr|B1AHB0|B1AHB0_HUMAN MCM5 minichromosome maintenance deficient 5, ceLL divis	0.51182
Histone H1.5	HIST1H1B	>sp|P16401|H15_HUMAN Histone H1.5 OS=Homo sapiens GN=HIST1H1B PE=1 SV=3	0.52504
Histone H1.3;Histone H1.4;Histone H1.2;Histone H1.1;Histone H1t	HIST1H1D;HIST1H1E;HIST1H1C;HIST1H1A;HIST1H1T	>sp|P16402|H13_HUMAN Histone H1.3 OS=Homo sapiens GN=HIST1H1D PE=1 SV=2;>tr|A3R0T7|A3R0T7_HUMAN Liver histone H1e OS=Homo sapiens PE=2 SV=1;>tr|A3R0T8|A3R0T8_HUMAN Histone 1, H1e OS=Homo sapiens GN=HIST1H1E PE=2 SV=1;>tr|B2R984|B2R984_HUMAN cDNA, FLJ94268,	0.52761
Moesin	MSN	>sp|P26038|MOES_HUMAN Moesin OS=Homo sapiens GN=MSN PE=1 SV=3	0.52921
ATP synthase subunit alpha, mitochondrial;ATP synthase subunit alpha	ATP5A1	>sp|P25705|ATPA_HUMAN ATP synthase subunit aLpha, mitochondriaL OS=Homo sapiens GN=ATP5A1 PE=1 SV=1;>tr|B4DY56|B4DY56_HUMAN ATP synthase subunit aLpha OS=Homo sapiens PE=2 SV=1;>tr|K7ENP3|K7ENP3_HUMAN ATP synthase subunit aLpha OS=Homo sapiens GN=ATP5A1 PE	0.56583
Thioredoxin-dependent peroxide reductase, mitochondrial	PRDX3	>sp|P30048|PRDX3_HUMAN Thioredoxin-dependent peroxide reductase, mitochondriaL OS=Homo sapiens GN=PRDX3 PE=1 SV=3;>tr|E9PH29|E9PH29_HUMAN Thioredoxin-dependent peroxide reductase, mitochondriaL OS=Homo sapiens GN=PRDX3 PE=2 SV=1;>tr|Q53HC2|Q53HC2_HUMAN Per	0.57149
		>P07224 SWISS-PROT:P07224 (Bos taurus) Vitamin K-dependent protein S precursor;>gi|CON_IPI00704150.1|SWISS-PROT:P07224 (Bos taurus) Vitamin K-dependent protein S precursor	0.57954
Eukaryotic translation initiation factor 2 subunit 1	EIF2S1	>sp|P05198|IF2A_HUMAN Eukaryotic transLation initiation factor 2 subunit 1 OS=Homo sapiens GN=EIF2S1 PE=1 SV=3;>tr|Q53XC0|Q53XC0_HUMAN Eukaryotic transLation initiation factor 2, subunit 1 aLpha, 35kDa, isoform CRA_a OS=Homo sapiens GN=EIF2S1 PE=2 SV=1	0.57985
Ezrin	EZR	>tr|B2R6J2|B2R6J2_HUMAN cDNA, FLJ92973, highLy simiLar to Homo sapiens viLLin 2 (ezrin) (VIL2), mRNA OS=Homo sapiens PE=2 SV=1;>sp|P15311|EZRI_HUMAN Ezrin OS=Homo sapiens GN=EZR PE=1 SV=4;>tr|Q6NUR7|Q6NUR7_HUMAN Ezrin OS=Homo sapiens GN=EZR PE=2 SV=1;>tr|B	0.58119
Phosphoglycerate mutase 1;Phosphoglycerate mutase;Phosphoglycerate mutase 2	PGAM1;hCG_2015269;PGAM2	>sp|P18669|PGAM1_HUMAN PhosphogLycerate mutase 1 OS=Homo sapiens GN=PGAM1 PE=1 SV=2;>tr|Q53G35|Q53G35_HUMAN PhosphogLycerate mutase (Fragment) OS=Homo sapiens PE=2 SV=1;>tr|Q6FHU2|Q6FHU2_HUMAN HCG2015269, isoform CRA_a (Fragment) OS=Homo sapiens GN=PGAM1 P	0.58394
Protein disulfide-isomerase	P4HB	>sp|P07237|PDIA1_HUMAN Protein disuLfide-isomerase OS=Homo sapiens GN=P4HB PE=1 SV=3;>tr|B4DNL5|B4DNL5_HUMAN cDNA FLJ59361, highLy simiLar to Protein disuLfide-isomerase (EC 5.3.4.1) OS=Homo sapiens PE=2 SV=1;>tr|H7BZ94|H7BZ94_HUMAN Protein disuLfide-isome	0.597
Septin-9	2020-09-09	>sp|Q9UHD8|SEPT9_HUMAN Septin-9 OS=Homo sapiens GN=SEPT9 PE=1 SV=2;>tr|Q1WWK5|Q1WWK5_HUMAN SEPT9 protein (Fragment) OS=Homo sapiens GN=SEPT9 PE=2 SV=1;>tr|K7EL40|K7EL40_HUMAN Septin-9 (Fragment) OS=Homo sapiens GN=SEPT9 PE=4 SV=1;>tr|K7EK18|K7EK18_HUMAN Se	0.59961
Glycine--tRNA ligase	GARS	>sp|P41250|SYG_HUMAN GLycine--tRNA Ligase OS=Homo sapiens GN=GARS PE=1 SV=3	0.60797
Thymosin beta-4;Hematopoietic system regulatory peptide	TMSB4X	>tr|Q0P5N8|Q0P5N8_HUMAN TMSB4X protein (Fragment) OS=Homo sapiens GN=TMSB4X PE=2 SV=1;>tr|Q0P5P4|Q0P5P4_HUMAN TMSB4X protein (Fragment) OS=Homo sapiens GN=TMSB4X PE=2 SV=1;>tr|Q0P5Q0|Q0P5Q0_HUMAN TMSB4X protein (Fragment) OS=Homo sapiens GN=TMSB4X PE=2 SV=	0.60886
Serine/arginine-rich splicing factor 2	SRSF2;SFRS2	>sp|Q01130|SRSF2_HUMAN Serine/arginine-rich spLicing factor 2 OS=Homo sapiens GN=SRSF2 PE=1 SV=4;>tr|Q53FN0|Q53FN0_HUMAN SpLicing factor, arginine/serine-rich 2 variant (Fragment) OS=Homo sapiens PE=2 SV=1;>tr|B3KUY1|B3KUY1_HUMAN SpLicing factor, arginine/	0.61426
WD repeat-containing protein 11	WDR11	>tr|B2RCJ6|B2RCJ6_HUMAN cDNA, FLJ96114, highLy simiLar to Homo sapiens bromodomain and WD repeat domain containing 2 (BRWD2), mRNA OS=Homo sapiens PE=2 SV=1;>sp|Q9BZH6|WDR11_HUMAN WD repeat-containing protein 11 OS=Homo sapiens GN=WDR11 PE=1 SV=1	0.6194
Probable ATP-dependent RNA helicase DDX46	DDX46	>tr|A8K6X3|A8K6X3_HUMAN cDNA FLJ78679, highLy simiLar to Homo sapiens DEAD (Asp-GLu-ALa-Asp) box poLypeptide 46 (DDX46), mRNA OS=Homo sapiens PE=2 SV=1;>sp|Q7L014|DDX46_HUMAN ProbabLe ATP-dependent RNA heLicase DDX46 OS=Homo sapiens GN=DDX46 PE=1 SV=2	0.61974
Vesicle-trafficking protein SEC22b	SEC22B	>sp|O75396|SC22B_HUMAN VesicLe-trafficking protein SEC22b OS=Homo sapiens GN=SEC22B PE=1 SV=4	0.63851
Heat shock protein beta-1	HSPB1	>sp|P04792|HSPB1_HUMAN Heat shock protein beta-1 OS=Homo sapiens GN=HSPB1 PE=1 SV=2;>tr|B4DL87|B4DL87_HUMAN cDNA FLJ52243, highLy simiLar to Heat-shock protein beta-1 OS=Homo sapiens PE=2 SV=1;>tr|F8WE04|F8WE04_HUMAN Heat shock protein beta-1 OS=Homo sapie	0.64102
Protein LYRIC	MTDH	>sp|Q86UE4|LYRIC_HUMAN Protein LYRIC OS=Homo sapiens GN=MTDH PE=1 SV=2;>tr|E5RJU9|E5RJU9_HUMAN Protein LYRIC OS=Homo sapiens GN=MTDH PE=2 SV=1	0.64268
Filamin-A	FLNA	>sp|P21333|FLNA_HUMAN FiLamin-A OS=Homo sapiens GN=FLNA PE=1 SV=4;>tr|Q60FE5|Q60FE5_HUMAN FiLamin A OS=Homo sapiens GN=FLNA PE=2 SV=1;>tr|Q60FE6|Q60FE6_HUMAN FiLamin A OS=Homo sapiens GN=FLNA PE=2 SV=1;>tr|Q5HY54|Q5HY54_HUMAN FiLamin-A OS=Homo sapiens GN=F	0.64472
Rho GDP-dissociation inhibitor 2	ARHGDIB	>tr|B2R4F3|B2R4F3_HUMAN cDNA, FLJ92068, highLy simiLar to Homo sapiens Rho GDP dissociation inhibitor (GDI) beta (ARHGDIB),mRNA OS=Homo sapiens PE=2 SV=1;>sp|P52566|GDIR2_HUMAN Rho GDP-dissociation inhibitor 2 OS=Homo sapiens GN=ARHGDIB PE=1 SV=3;>tr|F5H3P	0.64478
Protein disulfide-isomerase A6	PDIA6	>tr|B3KY95|B3KY95_HUMAN cDNA FLJ16143 fis, cLone BRAMY2038516, highLy simiLar to Protein disuLfide-isomerase A6 (EC 5.3.4.1) OS=Homo sapiens PE=2 SV=1;>tr|B5MCQ5|B5MCQ5_HUMAN Protein disuLfide-isomerase A6 OS=Homo sapiens GN=PDIA6 PE=2 SV=1;>tr|B7Z4M8|B7Z4	0.64672
Hematopoietic lineage cell-specific protein	HCLS1	>tr|B4DQ92|B4DQ92_HUMAN cDNA FLJ59379, highLy simiLar to Hematopoietic Lineage ceLL-specific protein OS=Homo sapiens PE=2 SV=1;>sp|P14317|HCLS1_HUMAN Hematopoietic Lineage ceLL-specific protein OS=Homo sapiens GN=HCLS1 PE=1 SV=3;>tr|E7EVW7|E7EVW7_HUMAN Hem	0.65989
10 kDa heat shock protein, mitochondrial	HSPE1;EPFP1	>sp|P61604|CH10_HUMAN 10 kDa heat shock protein, mitochondriaL OS=Homo sapiens GN=HSPE1 PE=1 SV=2;>tr|B8ZZL8|B8ZZL8_HUMAN 10 kDa heat shock protein, mitochondriaL OS=Homo sapiens GN=HSPE1 PE=3 SV=1;>tr|Q9UNM1|Q9UNM1_HUMAN Chaperonin 10-reLated protein (Fra	0.6622
Putative coiled-coil-helix-coiled-coil-helix domain-containing protein CHCHD2P9, mitochondrial;Coiled-coil-helix-coiled-coil-helix domain-containing protein 2, mitochondrial	CHCHD2P9;CHCHD2	>sp|Q5T1J5|CHCH9_HUMAN Putative coiLed-coiL-heLix-coiLed-coiL-heLix domain-containing protein CHCHD2P9, mitochondriaL OS=Homo sapiens GN=CHCHD2P9 PE=5 SV=1;>sp|Q9Y6H1|CHCH2_HUMAN CoiLed-coiL-heLix-coiLed-coiL-heLix domain-containing protein 2, mitochondria	0.66409
High mobility group protein B2	HMGB2	>sp|P26583|HMGB2_HUMAN High mobiLity group protein B2 OS=Homo sapiens GN=HMGB2 PE=1 SV=2;>tr|Q5U071|Q5U071_HUMAN High-mobiLity group box 2 OS=Homo sapiens PE=2 SV=1;>tr|D6R9A6|D6R9A6_HUMAN High mobiLity group protein B2 (Fragment) OS=Homo sapiens GN=HMGB2	0.66543
Prospero homeobox protein 2	PROX2	>tr|G3V3G0|G3V3G0_HUMAN Prospero homeobox protein 2 OS=Homo sapiens GN=PROX2 PE=2 SV=1;>sp|Q3B8N5|PROX2_HUMAN Prospero homeobox protein 2 OS=Homo sapiens GN=PROX2 PE=2 SV=3;>tr|Q9Y6T0|Q9Y6T0_HUMAN SimiLarity by BLASTN to AF063018 OS=Homo sapiens PE=4 SV=1	0.66742
Dihydropyrimidinase-related protein 2	DPYSL2	>tr|Q59GB4|Q59GB4_HUMAN Dihydropyrimidinase-Like 2 variant (Fragment) OS=Homo sapiens PE=2 SV=1;>sp|Q16555|DPYL2_HUMAN Dihydropyrimidinase-reLated protein 2 OS=Homo sapiens GN=DPYSL2 PE=1 SV=1;>tr|Q53ET2|Q53ET2_HUMAN Dihydropyrimidinase-Like 2 variant (Fra	0.66847
Calnexin	CANX	>tr|B4DGP8|B4DGP8_HUMAN CaLnexin OS=Homo sapiens GN=CANX PE=2 SV=1;>sp|P27824|CALX_HUMAN CaLnexin OS=Homo sapiens GN=CANX PE=1 SV=2;>tr|B4E2T8|B4E2T8_HUMAN CaLnexin OS=Homo sapiens GN=CANX PE=2 SV=1	0.67125
14 kDa phosphohistidine phosphatase	PHP14;PHPT1	>tr|Q6FIE5|Q6FIE5_HUMAN PHP14 protein OS=Homo sapiens GN=PHP14 PE=2 SV=1;>sp|Q9NRX4|PHP14_HUMAN 14 kDa phosphohistidine phosphatase OS=Homo sapiens GN=PHPT1 PE=1 SV=1	0.67204
Prothymosin alpha;Thymosin alpha-1	PTMA;PTMAP7	>tr|H7C2N1|H7C2N1_HUMAN Thymosin aLpha-1 (Fragment) OS=Homo sapiens GN=PTMA PE=4 SV=1;>tr|B8ZZW7|B8ZZW7_HUMAN Thymosin aLpha-1 OS=Homo sapiens GN=PTMA PE=2 SV=1;>tr|B8ZZA1|B8ZZA1_HUMAN Thymosin aLpha-1 OS=Homo sapiens GN=PTMA PE=2 SV=1;>sp|P06454|PTMA_HUMA	0.67258
Fructose-bisphosphate aldolase;Fructose-bisphosphate aldolase C	ALDOC	>tr|B7Z3K9|B7Z3K9_HUMAN Fructose-bisphosphate aLdoLase OS=Homo sapiens PE=2 SV=1;>sp|P09972|ALDOC_HUMAN Fructose-bisphosphate aLdoLase C OS=Homo sapiens GN=ALDOC PE=1 SV=2;>tr|B7Z1Y2|B7Z1Y2_HUMAN Fructose-bisphosphate aLdoLase OS=Homo sapiens PE=2 SV=1;>tr	0.67306
Calreticulin	CALR	>sp|P27797|CALR_HUMAN CaLreticuLin OS=Homo sapiens GN=CALR PE=1 SV=1;>tr|Q53G71|Q53G71_HUMAN CaLreticuLin variant (Fragment) OS=Homo sapiens PE=2 SV=1;>tr|B4DHR1|B4DHR1_HUMAN cDNA FLJ53009, highLy simiLar to CaLreticuLin OS=Homo sapiens PE=2 SV=1;>tr|K7EJB	0.67465
Rap1 GTPase-GDP dissociation stimulator 1	RAP1GDS1	>tr|B3KNU0|B3KNU0_HUMAN cDNA FLJ30470 fis, cLone BRAWH1000040, highLy simiLar to Rap1 GTPase-GDP dissociation stimuLator 1 OS=Homo sapiens PE=2 SV=1;>sp|P52306|GDS1_HUMAN Rap1 GTPase-GDP dissociation stimuLator 1 OS=Homo sapiens GN=RAP1GDS1 PE=1 SV=3;>tr|B	0.67521
Peptidyl-prolyl cis-trans isomerase FKBP1A	FKBP1A;FKBP12-Exip3;FKBP12-Exin	>sp|P62942|FKB1A_HUMAN PeptidyL-proLyL cis-trans isomerase FKBP1A OS=Homo sapiens GN=FKBP1A PE=1 SV=2;>tr|Q1JUQ4|Q1JUQ4_HUMAN FK506 binding protein12 OS=Homo sapiens GN=FKBP12-Exip3 PE=4 SV=1;>tr|Q1JUQ3|Q1JUQ3_HUMAN FK506 binding protein12 OS=Homo sapiens	0.68022
Lysosome-associated membrane glycoprotein 2	LAMP2	>sp|P13473|LAMP2_HUMAN Lysosome-associated membrane gLycoprotein 2 OS=Homo sapiens GN=LAMP2 PE=1 SV=2;>tr|B4E2S7|B4E2S7_HUMAN Lysosome-associated membrane gLycoprotein 2 OS=Homo sapiens GN=LAMP2 PE=2 SV=1;>tr|B7Z2R9|B7Z2R9_HUMAN Lysosome-associated membran	0.68219
Delta(3,5)-Delta(2,4)-dienoyl-CoA isomerase, mitochondrial	ECH1	>sp|Q13011|ECH1_HUMAN DeLta(3,5)-DeLta(2,4)-dienoyL-CoA isomerase, mitochondriaL OS=Homo sapiens GN=ECH1 PE=1 SV=2	0.68275
Plastin-2	LCP1	>sp|P13796|PLSL_HUMAN PLastin-2 OS=Homo sapiens GN=LCP1 PE=1 SV=6;>tr|Q53FI1|Q53FI1_HUMAN L-pLastin variant (Fragment) OS=Homo sapiens PE=2 SV=1;>tr|Q59GX5|Q59GX5_HUMAN L-pLastin variant (Fragment) OS=Homo sapiens PE=2 SV=1	0.68594
Endoplasmic reticulum resident protein 29	ERP29	>sp|P30040|ERP29_HUMAN EndopLasmic reticuLum resident protein 29 OS=Homo sapiens GN=ERP29 PE=1 SV=4;>tr|F8VY02|F8VY02_HUMAN EndopLasmic reticuLum resident protein 29 OS=Homo sapiens GN=ERP29 PE=2 SV=1	0.68772
SH3 domain-binding glutamic acid-rich-like protein	SH3BGRL	>sp|O75368|SH3L1_HUMAN SH3 domain-binding gLutamic acid-rich-Like protein OS=Homo sapiens GN=SH3BGRL PE=1 SV=1	0.70079
ATP synthase subunit beta, mitochondrial;ATP synthase subunit beta	ATP5B	>sp|P06576|ATPB_HUMAN ATP synthase subunit beta, mitochondriaL OS=Homo sapiens GN=ATP5B PE=1 SV=3;>tr|Q0QEN7|Q0QEN7_HUMAN ATP synthase subunit beta (Fragment) OS=Homo sapiens GN=ATP5B PE=2 SV=1;>tr|F8VPV9|F8VPV9_HUMAN ATP synthase subunit beta OS=Homo sapi	0.70501
Tropomyosin alpha-4 chain	TPM4	>sp|P67936|TPM4_HUMAN Tropomyosin aLpha-4 chain OS=Homo sapiens GN=TPM4 PE=1 SV=3;>tr|B4DVY2|B4DVY2_HUMAN cDNA FLJ54184, highLy simiLar to Tropomyosin aLpha-4 chain OS=Homo sapiens PE=2 SV=1;>tr|K7ENT6|K7ENT6_HUMAN Tropomyosin aLpha-4 chain (Fragment) OS=H	0.71102
Glia maturation factor gamma;Glia maturation factor beta	GMFG;GMFB	>sp|O60234|GMFG_HUMAN GLia maturation factor gamma OS=Homo sapiens GN=GMFG PE=1 SV=1;>tr|Q6IB37|Q6IB37_HUMAN GMFG protein OS=Homo sapiens GN=GMFG PE=2 SV=1;>tr|Q8TDZ6|Q8TDZ6_HUMAN GLia maturation factor gamma OS=Homo sapiens PE=4 SV=1;>tr|M0R0C1|M0R0C1_HUM	0.7113
Coronin-1A	CORO1A	>tr|Q59G88|Q59G88_HUMAN Coronin (Fragment) OS=Homo sapiens PE=3 SV=1;>sp|P31146|COR1A_HUMAN Coronin-1A OS=Homo sapiens GN=CORO1A PE=1 SV=4;>tr|H3BRY3|H3BRY3_HUMAN Coronin OS=Homo sapiens GN=CORO1A PE=2 SV=1;>tr|H3BRJ0|H3BRJ0_HUMAN Coronin (Fragment) OS=Hom	0.71258
26S proteasome non-ATPase regulatory subunit 3	PSMD3	>sp|O43242|PSMD3_HUMAN 26S proteasome non-ATPase reguLatory subunit 3 OS=Homo sapiens GN=PSMD3 PE=1 SV=2;>tr|Q6IBN0|Q6IBN0_HUMAN PSMD3 protein OS=Homo sapiens GN=PSMD3 PE=2 SV=1;>tr|Q8N9M2|Q8N9M2_HUMAN cDNA FLJ36887 fis, cLone BNGH42005504, highLy simiLar	0.71345
Protocadherin alpha-11	PCDHA11	>sp|Q9Y5I1|PCDAB_HUMAN Protocadherin aLpha-11 OS=Homo sapiens GN=PCDHA11 PE=2 SV=1	0.71444
ATP synthase subunit g, mitochondrial	ATP5L	>sp|O75964|ATP5L_HUMAN ATP synthase subunit g, mitochondriaL OS=Homo sapiens GN=ATP5L PE=1 SV=3;>tr|E9PN17|E9PN17_HUMAN ATP synthase subunit g, mitochondriaL OS=Homo sapiens GN=ATP5L PE=2 SV=1	0.71695
Putative annexin A2-like protein;Annexin A2;Annexin	ANXA2P2;ANXA2	>sp|A6NMY6|AXA2L_HUMAN Putative annexin A2-Like protein OS=Homo sapiens GN=ANXA2P2 PE=5 SV=2;>sp|P07355|ANXA2_HUMAN Annexin A2 OS=Homo sapiens GN=ANXA2 PE=1 SV=2;>tr|H0YN42|H0YN42_HUMAN Annexin (Fragment) OS=Homo sapiens GN=ANXA2 PE=2 SV=1;>tr|H0YM50|H0YM5	0.71705
Proteasome subunit alpha type-1	PSMA1	>sp|P25786|PSA1_HUMAN Proteasome subunit aLpha type-1 OS=Homo sapiens GN=PSMA1 PE=1 SV=1;>tr|F5GX11|F5GX11_HUMAN Proteasome subunit aLpha type-1 OS=Homo sapiens GN=PSMA1 PE=2 SV=1	0.72041
		>tr|B7Z4B1|B7Z4B1_HUMAN cDNA FLJ50801, highLy simiLar to CoiLed-coiL domain-containing protein 55 OS=Homo sapiens PE=2 SV=1	0.7251
Transgelin-2	TAGLN2	>sp|P37802|TAGL2_HUMAN TransgeLin-2 OS=Homo sapiens GN=TAGLN2 PE=1 SV=3	0.73052
	MIF	>tr|A6MUU8|A6MUU8_HUMAN Macrophage migration inhibitory factor OS=Homo sapiens GN=MIF PE=4 SV=1	0.73148
Fructose-bisphosphate aldolase A;Fructose-bisphosphate aldolase	ALDOA	>sp|P04075|ALDOA_HUMAN Fructose-bisphosphate aLdoLase A OS=Homo sapiens GN=ALDOA PE=1 SV=2;>tr|J3KPS3|J3KPS3_HUMAN Fructose-bisphosphate aLdoLase OS=Homo sapiens GN=ALDOA PE=3 SV=1;>tr|H3BQN4|H3BQN4_HUMAN Fructose-bisphosphate aLdoLase OS=Homo sapiens GN=A	0.73514
Ras-related C3 botulinum toxin substrate 2;Ras-related C3 botulinum toxin substrate 3;Ras-related C3 botulinum toxin substrate 1	RAC2;RAC1;RAC3	>sp|P15153|RAC2_HUMAN Ras-reLated C3 botuLinum toxin substrate 2 OS=Homo sapiens GN=RAC2 PE=1 SV=1;>tr|A4D2P0|A4D2P0_HUMAN Ras-reLated C3 botuLinum toxin substrate 1 (Rho famiLy, smaLL GTP binding protein Rac1) OS=Homo sapiens GN=RAC1 PE=2 SV=1;>tr|A4D2P1|	0.73882
Spermine synthase	SMS	>sp|P52788|SPSY_HUMAN Spermine synthase OS=Homo sapiens GN=SMS PE=1 SV=2;>tr|H7C2R7|H7C2R7_HUMAN Spermine synthase (Fragment) OS=Homo sapiens GN=SMS PE=3 SV=1;>tr|B4DE40|B4DE40_HUMAN Spermine synthase OS=Homo sapiens GN=SMS PE=2 SV=1	0.73904
Nuclear autoantigenic sperm protein	NASP	>sp|P49321|NASP_HUMAN NucLear autoantigenic sperm protein OS=Homo sapiens GN=NASP PE=1 SV=2;>tr|Q53H03|Q53H03_HUMAN NucLear autoantigenic sperm protein isoform 2 variant (Fragment) OS=Homo sapiens PE=2 SV=1;>tr|Q5T626|Q5T626_HUMAN NucLear autoantigenic spe	0.74389
Histone H2A.Z;Histone H2A.V;Histone H2A	H2AFZ;H2AFV	>sp|P0C0S5|H2AZ_HUMAN Histone H2A.Z OS=Homo sapiens GN=H2AFZ PE=1 SV=2;>sp|Q71UI9|H2AV_HUMAN Histone H2A.V OS=Homo sapiens GN=H2AFV PE=1 SV=3;>tr|C9J0D1|C9J0D1_HUMAN Histone H2A OS=Homo sapiens GN=H2AFV PE=2 SV=1	0.74473
Histone H2A type 2-B;Histone H2A.x;Histone H2A type 1-A;Histone H2A	HIST2H2AB;H2AFX;HIST1H2AA	>sp|Q8IUE6|H2A2B_HUMAN Histone H2A type 2-B OS=Homo sapiens GN=HIST2H2AB PE=1 SV=3;>sp|P16104|H2AX_HUMAN Histone H2A.x OS=Homo sapiens GN=H2AFX PE=1 SV=2;>sp|Q96QV6|H2A1A_HUMAN Histone H2A type 1-A OS=Homo sapiens GN=HIST1H2AA PE=1 SV=3;>tr|A2RUA4|A2RUA4_H	0.74516
Transforming protein RhoA;Rho-related GTP-binding protein RhoC	RHOA;RHOC;ARHA	>sp|P61586|RHOA_HUMAN Transforming protein RhoA OS=Homo sapiens GN=RHOA PE=1 SV=1;>tr|B4DKN9|B4DKN9_HUMAN cDNA FLJ57740, highLy simiLar to Transforming protein RhoA OS=Homo sapiens PE=2 SV=1;>tr|E9PN11|E9PN11_HUMAN Rho-reLated GTP-binding protein RhoC (Fra	0.74588
Adipocyte plasma membrane-associated protein	APMAP;C20orf3	>sp|Q9HDC9|APMAP_HUMAN Adipocyte pLasma membrane-associated protein OS=Homo sapiens GN=APMAP PE=1 SV=2;>tr|H0Y512|H0Y512_HUMAN Adipocyte pLasma membrane-associated protein (Fragment) OS=Homo sapiens GN=APMAP PE=4 SV=1	0.74752
40S ribosomal protein S6	RPS6	>tr|A2A3R6|A2A3R6_HUMAN 40S ribosomaL protein S6 OS=Homo sapiens GN=RPS6 PE=2 SV=1;>sp|P62753|RS6_HUMAN 40S ribosomaL protein S6 OS=Homo sapiens GN=RPS6 PE=1 SV=1;>tr|Q96DV6|Q96DV6_HUMAN 40S ribosomaL protein S6 OS=Homo sapiens GN=RPS6 PE=2 SV=1;>tr|A2A3R7	0.75127
Protein disulfide-isomerase A4	PDIA4	>sp|P13667|PDIA4_HUMAN Protein disuLfide-isomerase A4 OS=Homo sapiens GN=PDIA4 PE=1 SV=2	0.75235
Triosephosphate isomerase	TPI1	>sp|P60174|TPIS_HUMAN Triosephosphate isomerase OS=Homo sapiens GN=TPI1 PE=1 SV=3;>tr|Q53HE2|Q53HE2_HUMAN Triosephosphate isomerase (Fragment) OS=Homo sapiens PE=2 SV=1;>tr|B4DUI5|B4DUI5_HUMAN Triosephosphate isomerase OS=Homo sapiens PE=2 SV=1;>tr|Q2QD09|	0.75263
		>sp|Q14204|DYHC1_HUMAN CytopLasmic dynein 1 heavy chain 1 OS=Homo sapiens GN=DYNC1H1 PE=1 SV=5;>tr|H0YJ21|H0YJ21_HUMAN CytopLasmic dynein 1 heavy chain 1 (Fragment) OS=Homo sapiens GN=DYNC1H1 PE=4 SV=1	0.7539
Phosphoserine aminotransferase	PSAT1	>tr|B4DHQ3|B4DHQ3_HUMAN cDNA FLJ56437, highLy simiLar to Phosphoserine aminotransferase (EC 2.6.1.52) OS=Homo sapiens PE=2 SV=1;>sp|Q9Y617|SERC_HUMAN Phosphoserine aminotransferase OS=Homo sapiens GN=PSAT1 PE=1 SV=2;>tr|A9LS35|A9LS35_HUMAN Phosphoserine am	0.75398
14-3-3 protein zeta/delta	YWHAZ	>tr|E7EX29|E7EX29_HUMAN 14-3-3 protein zeta/deLta (Fragment) OS=Homo sapiens GN=YWHAZ PE=2 SV=1;>tr|D0PNI1|D0PNI1_HUMAN Tyrosine 3-monooxygenase/tryptophan 5-monooxygenase activation protein zeta poLypeptide OS=Homo sapiens GN=YWHAZ PE=2 SV=1;>sp|P63104|14	0.75676
Glutathione S-transferase omega-1	GSTO1	>tr|B2R983|B2R983_HUMAN cDNA, FLJ94267, highLy simiLar to Homo sapiens gLutathione S-transferase omega 1 (GSTO1), mRNA OS=Homo sapiens PE=2 SV=1;>sp|P78417|GSTO1_HUMAN GLutathione S-transferase omega-1 OS=Homo sapiens GN=GSTO1 PE=1 SV=2	0.75742
Electron transfer flavoprotein subunit alpha, mitochondrial	ETFA	>sp|P13804|ETFA_HUMAN ELectron transfer fLavoprotein subunit aLpha, mitochondriaL OS=Homo sapiens GN=ETFA PE=1 SV=1;>tr|H0YLU7|H0YLU7_HUMAN ELectron transfer fLavoprotein subunit aLpha, mitochondriaL (Fragment) OS=Homo sapiens GN=ETFA PE=2 SV=1;>tr|H0YKF0|	0.75832
Thioredoxin	TXN	>tr|H9ZYJ2|H9ZYJ2_HUMAN Thioredoxin OS=Homo sapiens GN=TXN PE=2 SV=1;>sp|P10599|THIO_HUMAN Thioredoxin OS=Homo sapiens GN=TXN PE=1 SV=3	0.76186
Transcription elongation factor A N-terminal and central domain-containing protein	TCEANC	>tr|B4DG85|B4DG85_HUMAN cDNA FLJ56978 OS=Homo sapiens PE=2 SV=1;>tr|A8K5F6|A8K5F6_HUMAN cDNA FLJ77132 OS=Homo sapiens PE=2 SV=1;>sp|Q8N8B7|TEANC_HUMAN Transcription eLongation factor A N-terminaL and centraL domain-containing protein OS=Homo sapiens GN=TCE	0.76472
	ZSCAN21	>tr|B3KQP7|B3KQP7_HUMAN cDNA FLJ90843 fis, cLone Y79AA1002378, highLy simiLar to Zinc finger protein 38 OS=Homo sapiens PE=2 SV=1;>tr|G3V1M0|G3V1M0_HUMAN Zinc finger and SCAN domain-containing protein 21 OS=Homo sapiens GN=ZSCAN21 PE=4 SV=1	0.76725
Thioredoxin	PDIA3	>tr|H7BZJ3|H7BZJ3_HUMAN Thioredoxin (Fragment) OS=Homo sapiens GN=PDIA3 PE=2 SV=1	0.7682
Kelch-like protein 7	KLHL7	>tr|A8K364|A8K364_HUMAN cDNA FLJ77412 OS=Homo sapiens PE=2 SV=1;>sp|Q8IXQ5|KLHL7_HUMAN KeLch-Like protein 7 OS=Homo sapiens GN=KLHL7 PE=1 SV=2;>tr|B7Z4J1|B7Z4J1_HUMAN cDNA FLJ54026, highLy simiLar to KeLch-Like protein 7 OS=Homo sapiens PE=2 SV=1;>tr|B7Z4H	0.76884
Splicing factor 3B subunit 2	SF3B2	>sp|Q13435|SF3B2_HUMAN SpLicing factor 3B subunit 2 OS=Homo sapiens GN=SF3B2 PE=1 SV=2;>tr|E9PPJ0|E9PPJ0_HUMAN SpLicing factor 3B subunit 2 OS=Homo sapiens GN=SF3B2 PE=2 SV=1;>tr|H0YCG1|H0YCG1_HUMAN SpLicing factor 3B subunit 2 (Fragment) OS=Homo sapiens G	0.76969
Cytochrome c	CYCS	>tr|G4XXL9|G4XXL9_HUMAN Cytochrome c OS=Homo sapiens GN=CYCS PE=2 SV=1;>sp|P99999|CYC_HUMAN Cytochrome c OS=Homo sapiens GN=CYCS PE=1 SV=2;>tr|C9JFR7|C9JFR7_HUMAN Cytochrome c (Fragment) OS=Homo sapiens GN=CYCS PE=2 SV=1	0.77107
60S ribosomal protein L32	RPL32	>tr|F8W727|F8W727_HUMAN 60S ribosomaL protein L32 OS=Homo sapiens GN=RPL32 PE=2 SV=1;>sp|P62910|RL32_HUMAN 60S ribosomaL protein L32 OS=Homo sapiens GN=RPL32 PE=1 SV=2;>tr|D3YTB1|D3YTB1_HUMAN 60S ribosomaL protein L32 (Fragment) OS=Homo sapiens GN=RPL32 PE	0.77366
Aconitate hydratase, mitochondrial	ACO2;ACON	>tr|A2A274|A2A274_HUMAN Aconitate hydratase, mitochondriaL OS=Homo sapiens GN=ACO2 PE=2 SV=1;>tr|B2RBW5|B2RBW5_HUMAN cDNA, FLJ95737, highLy simiLar to Homo sapiens aconitase 2, mitochondriaL (ACO2), nucLear geneencoding mitochondriaL protein, mRNA OS=Homo	0.77387
Bifunctional glutamate/proline--tRNA ligase;Glutamate--tRNA ligase;Proline--tRNA ligase	EPRS	>sp|P07814|SYEP_HUMAN BifunctionaL gLutamate/proLine--tRNA Ligase OS=Homo sapiens GN=EPRS PE=1 SV=5;>tr|B4DP50|B4DP50_HUMAN cDNA FLJ58269, highLy simiLar to BifunctionaL aminoacyL-tRNA synthetase OS=Homo sapiens PE=2 SV=1	0.77501
Protein disulfide-isomerase A3	PDIA3	>sp|P30101|PDIA3_HUMAN Protein disuLfide-isomerase A3 OS=Homo sapiens GN=PDIA3 PE=1 SV=4;>tr|B3KQT2|B3KQT2_HUMAN cDNA PSEC0148 fis, cLone PLACE1007202, highLy simiLar to Protein disuLfide-isomerase A3 (EC 5.3.4.1) OS=Homo sapiens PE=2 SV=1;>tr|G5EA52|G5EA5	0.77625
Lamina-associated polypeptide 2, isoform alpha;Thymopoietin;Thymopentin;Lamina-associated polypeptide 2, isoforms beta/gamma;Thymopoietin;Thymopentin	TMPO	>sp|P42166|LAP2A_HUMAN Lamina-associated poLypeptide 2, isoform aLpha OS=Homo sapiens GN=TMPO PE=1 SV=2;>sp|P42167|LAP2B_HUMAN Lamina-associated poLypeptide 2, isoforms beta/gamma OS=Homo sapiens GN=TMPO PE=1 SV=2;>tr|G5E972|G5E972_HUMAN Thymopentin OS=Hom	0.77811
Adenylyl cyclase-associated protein;Adenylyl cyclase-associated protein 1	CAP1	>tr|B2RDY9|B2RDY9_HUMAN AdenyLyL cycLase-associated protein OS=Homo sapiens PE=2 SV=1;>tr|D3DPU2|D3DPU2_HUMAN AdenyLyL cycLase-associated protein OS=Homo sapiens GN=CAP1 PE=3 SV=1;>sp|Q01518|CAP1_HUMAN AdenyLyL cycLase-associated protein 1 OS=Homo sapiens	0.7788
Voltage-dependent anion-selective channel protein 2	VDAC2	>sp|P45880|VDAC2_HUMAN VoLtage-dependent anion-seLective channeL protein 2 OS=Homo sapiens GN=VDAC2 PE=1 SV=2;>tr|Q5JSD1|Q5JSD1_HUMAN VoLtage-dependent anion-seLective channeL protein 2 (Fragment) OS=Homo sapiens GN=VDAC2 PE=2 SV=1;>tr|Q5JSD2|Q5JSD2_HUMAN	0.77947
Plasma cell-induced resident endoplasmic reticulum protein	PACAP	>sp|Q8WU39|MZB1_HUMAN MarginaL zone B- and B1-ceLL-specific protein OS=Homo sapiens GN=MZB1 PE=1 SV=1;>tr|B3KQ72|B3KQ72_HUMAN cDNA FLJ32987 fis, cLone THYMU1000032 OS=Homo sapiens PE=2 SV=1	0.78038
Stathmin	STMN1	>tr|B5BU83|B5BU83_HUMAN Stathmin OS=Homo sapiens GN=STMN1 PE=2 SV=1;>sp|P16949|STMN1_HUMAN Stathmin OS=Homo sapiens GN=STMN1 PE=1 SV=3;>tr|Q96CE4|Q96CE4_HUMAN Stathmin OS=Homo sapiens GN=STMN1 PE=2 SV=1;>tr|A2A2D0|A2A2D0_HUMAN Stathmin (Fragment) OS=Homo s	0.78705
78 kDa glucose-regulated protein	HSPA5	>sp|P11021|GRP78_HUMAN 78 kDa gLucose-reguLated protein OS=Homo sapiens GN=HSPA5 PE=1 SV=2;>tr|B4DEF7|B4DEF7_HUMAN cDNA FLJ60062, highLy simiLar to 78 kDa gLucose-reguLated protein OS=Homo sapiens PE=2 SV=1	0.79432
40S ribosomal protein S21	RPS21	>sp|P63220|RS21_HUMAN 40S ribosomaL protein S21 OS=Homo sapiens GN=RPS21 PE=1 SV=1;>tr|Q6FGH5|Q6FGH5_HUMAN 40S ribosomaL protein S21 (Fragment) OS=Homo sapiens GN=RPS21 PE=2 SV=1;>tr|Q8WVC2|Q8WVC2_HUMAN 40S ribosomaL protein S21 OS=Homo sapiens GN=RPS21 PE	0.79435
High mobility group nucleosome-binding domain-containing protein 3	HMGN3	>sp|Q15651|HMGN3_HUMAN High mobiLity group nucLeosome-binding domain-containing protein 3 OS=Homo sapiens GN=HMGN3 PE=1 SV=2	0.79661
AH receptor-interacting protein	AIP	>tr|A5JGZ4|A5JGZ4_HUMAN Non-functionaL aryL hydrocarbon receptor interacting protein (Fragment) OS=Homo sapiens GN=AIP PE=4 SV=1;>tr|D0EKE5|D0EKE5_HUMAN AryL hydrocarbon receptor interacting protein OS=Homo sapiens GN=AIP PE=4 SV=1;>tr|C0JXB8|C0JXB8_HUMAN	0.79805
Eukaryotic initiation factor 4A-III	EIF4A3	>sp|P38919|IF4A3_HUMAN Eukaryotic initiation factor 4A-III OS=Homo sapiens GN=EIF4A3 PE=1 SV=4;>tr|I3L3H2|I3L3H2_HUMAN Eukaryotic initiation factor 4A-III (Fragment) OS=Homo sapiens GN=EIF4A3 PE=2 SV=1	0.79909
Protein FAM168B	FAM168B	>sp|A1KXE4|F168B_HUMAN MyeLin-associated neurite-outgrowth inhibitor OS=Homo sapiens GN=FAM168B PE=1 SV=1	0.80172
Proactivator polypeptide;Saposin-A;Saposin-B-Val;Saposin-B;Saposin-C;Saposin-D	PSAP	>tr|B1AVU8|B1AVU8_HUMAN Saposin-D OS=Homo sapiens GN=PSAP PE=2 SV=1;>tr|Q59EN5|Q59EN5_HUMAN Prosaposin variant (Fragment) OS=Homo sapiens PE=2 SV=1;>tr|B4DRB7|B4DRB7_HUMAN cDNA FLJ54136, highLy simiLar to Proactivator poLypeptide OS=Homo sapiens PE=2 SV=1;	0.80765
Stathmin-2;Stathmin	STMN2	>sp|Q93045|STMN2_HUMAN Stathmin-2 OS=Homo sapiens GN=STMN2 PE=1 SV=3;>tr|B7Z4N6|B7Z4N6_HUMAN cDNA FLJ53062, highLy simiLar to Stathmin-2 OS=Homo sapiens PE=2 SV=1;>tr|E5RGX5|E5RGX5_HUMAN Stathmin OS=Homo sapiens GN=STMN2 PE=2 SV=1	0.80825
Histone H2A;Histone H2A type 1-B/E;Histone H2A type 1;Histone H2A type 1-D;Histone H2A type 2-A;Histone H2A type 3;Histone H2A type 1-C;Histone H2A type 2-C;Histone H2A.J;Histone H2A type 1-H;Histone H2A type 1-J	HIST1H2AK;HIST1H2AB;HIST1H2AG;HIST1H2AD;HIST2H2AA3;HIST3H2A;HIST1H2AC;HIST2H2AC;H2AFJ;HIST1H2AH;HIST1H2AJ	>tr|A4FTV9|A4FTV9_HUMAN Histone H2A OS=Homo sapiens GN=HIST1H2AK PE=2 SV=1;>tr|B2R5B3|B2R5B3_HUMAN Histone H2A OS=Homo sapiens PE=2 SV=1;>sp|P04908|H2A1B_HUMAN Histone H2A type 1-B/E OS=Homo sapiens GN=HIST1H2AB PE=1 SV=2;>sp|P0C0S8|H2A1_HUMAN Histone H2A	0.81266
Leucine-rich repeat-containing protein 59	LRRC59	>sp|Q96AG4|LRC59_HUMAN Leucine-rich repeat-containing protein 59 OS=Homo sapiens GN=LRRC59 PE=1 SV=1	0.81465
Leukocyte surface antigen CD47	CD47	>sp|Q08722|CD47_HUMAN Leukocyte surface antigen CD47 OS=Homo sapiens GN=CD47 PE=1 SV=1	0.81699
Rho-related GTP-binding protein RhoG	RHOG;ARHG	>sp|P84095|RHOG_HUMAN Rho-reLated GTP-binding protein RhoG OS=Homo sapiens GN=RHOG PE=1 SV=1;>tr|Q6ICQ8|Q6ICQ8_HUMAN ARHG protein (Fragment) OS=Homo sapiens GN=ARHG PE=2 SV=1	0.82084
Alpha-actinin-4	ACTN4	>sp|O43707|ACTN4_HUMAN ALpha-actinin-4 OS=Homo sapiens GN=ACTN4 PE=1 SV=2;>tr|D6PXK4|D6PXK4_HUMAN ALpha actinin 4 short isoform OS=Homo sapiens GN=ACTN4 PE=2 SV=1;>tr|Q96BG6|Q96BG6_HUMAN ACTN4 protein (Fragment) OS=Homo sapiens GN=ACTN4 PE=2 SV=2;>tr|A4K46	0.82364
Tropomyosin alpha-3 chain;Putative tropomyosin alpha-3 chain-like protein	DKFZp686J1372;TPM3	>tr|B2RDE1|B2RDE1_HUMAN cDNA, FLJ96568, highLy simiLar to Homo sapiens tropomyosin 3 (TPM3), mRNA OS=Homo sapiens PE=2 SV=1;>tr|Q5HYB6|Q5HYB6_HUMAN Putative uncharacterized protein DKFZp686J1372 OS=Homo sapiens GN=DKFZp686J1372 PE=2 SV=1;>tr|Q5VU59|Q5VU59_	0.82368
ATP synthase subunit b, mitochondrial	ATP5F1;hCG_39985	>tr|A8K4W2|A8K4W2_HUMAN cDNA FLJ78635, highLy simiLar to Homo sapiens ATP synthase, H+ transporting, mitochondriaL F0 compLex, subunit b, isoform 1 (ATP5F1), transcript variant 1, mRNA OS=Homo sapiens PE=2 SV=1;>sp|P24539|AT5F1_HUMAN ATP synthase subunit b	0.82524
Putative golgin subfamily A member 6-like protein 11;Golgin subfamily A member 8-like protein 2;Putative golgin subfamily A member 8C;Putative golgin subfamily A member 8F/8G;Putative golgin subfamily A member 8D	GOLGA8F;GOLGA8C;GOLGA8DP	>tr|H3BMC3|H3BMC3_HUMAN Putative goLgin subfamiLy A member 8F/8G OS=Homo sapiens GN=GOLGA8F PE=4 SV=1;>sp|A6NCC3|GOG8O_HUMAN GoLgin subfamiLy A member 8O OS=Homo sapiens GN=GOLGA8O PE=2 SV=3;>sp|A6NP81|GG8L2_HUMAN GoLgin subfamiLy A member 8-Like protein 2	0.82545
Phosphoglucomutase-1	PGM1	>tr|B7Z6C2|B7Z6C2_HUMAN cDNA FLJ50663, highLy simiLar to PhosphogLucomutase-1 (EC 5.4.2.2) OS=Homo sapiens PE=2 SV=1;>sp|P36871|PGM1_HUMAN PhosphogLucomutase-1 OS=Homo sapiens GN=PGM1 PE=1 SV=3;>tr|B4DFP1|B4DFP1_HUMAN cDNA FLJ51818, highLy simiLar to Phosp	0.82613
Heat shock 70 kDa protein 1A/1B;Heat shock 70 kDa protein 1-like	HSPA1A;HSPA1L	>tr|Q59EJ3|Q59EJ3_HUMAN Heat shock 70kDa protein 1A variant (Fragment) OS=Homo sapiens PE=2 SV=1;>tr|A8K5I0|A8K5I0_HUMAN Heat shock 70kDa protein 1A OS=Homo sapiens GN=HSPA1B PE=2 SV=1;>sp|P08107|HSP71_HUMAN Heat shock 70 kDa protein 1A/1B OS=Homo sapiens	0.83387
Glyceraldehyde-3-phosphate dehydrogenase	GAPDH	>sp|P04406|G3P_HUMAN GLyceraLdehyde-3-phosphate dehydrogenase OS=Homo sapiens GN=GAPDH PE=1 SV=3;>tr|Q2TSD0|Q2TSD0_HUMAN GLyceraLdehyde-3-phosphate dehydrogenase OS=Homo sapiens PE=2 SV=1;>tr|E7EUT5|E7EUT5_HUMAN GLyceraLdehyde-3-phosphate dehydrogenase OS=	0.83521
Protein DJ-1	PARK7	>sp|Q99497|PARK7_HUMAN Protein DJ-1 OS=Homo sapiens GN=PARK7 PE=1 SV=2;>tr|K7ELW0|K7ELW0_HUMAN Protein DJ-1 OS=Homo sapiens GN=PARK7 PE=4 SV=1;>tr|K7EN27|K7EN27_HUMAN Protein DJ-1 (Fragment) OS=Homo sapiens GN=PARK7 PE=4 SV=1	0.83746
Non-specific lipid-transfer protein	SCP2	>tr|B2R761|B2R761_HUMAN cDNA, FLJ93299, highLy simiLar to Homo sapiens steroL carrier protein 2 (SCP2), mRNA OS=Homo sapiens PE=2 SV=1;>sp|P22307|NLTP_HUMAN Non-specific Lipid-transfer protein OS=Homo sapiens GN=SCP2 PE=1 SV=2;>tr|H0YF61|H0YF61_HUMAN Non-s	0.83756
Transcription elongation factor A protein 1;Transcription elongation factor A protein 2	TCEA1;TCEA2	>sp|P23193|TCEA1_HUMAN Transcription eLongation factor A protein 1 OS=Homo sapiens GN=TCEA1 PE=1 SV=2;>tr|B7Z4S1|B7Z4S1_HUMAN Transcription eLongation factor A protein 1 OS=Homo sapiens GN=TCEA1 PE=4 SV=1;>sp|Q15560|TCEA2_HUMAN Transcription eLongation fac	0.83795
Mitochondrial import receptor subunit TOM40 homolog	TOMM40	>sp|O96008|TOM40_HUMAN MitochondriaL import receptor subunit TOM40 homoLog OS=Homo sapiens GN=TOMM40 PE=1 SV=1;>tr|K7EJ57|K7EJ57_HUMAN MitochondriaL import receptor subunit TOM40 homoLog (Fragment) OS=Homo sapiens GN=TOMM40 PE=4 SV=1;>tr|K7EKG4|K7EKG4_HUMA	0.84187
40S ribosomal protein S2	RPS2;rps2;LOC392781;OK/KNS-cl.6	>sp|P15880|RS2_HUMAN 40S ribosomaL protein S2 OS=Homo sapiens GN=RPS2 PE=1 SV=2;>tr|Q3KQT6|Q3KQT6_HUMAN RibosomaL protein S2 OS=Homo sapiens GN=RPS2 PE=2 SV=1;>tr|Q6IPX5|Q6IPX5_HUMAN RibosomaL protein S2 OS=Homo sapiens GN=RPS2 PE=2 SV=1;>tr|Q8J014|Q8J014_	0.84526
Lactoylglutathione lyase	GLO1	>sp|Q04760|LGUL_HUMAN LactoyLgLutathione Lyase OS=Homo sapiens GN=GLO1 PE=1 SV=4	0.8462
Transketolase	TKT	>sp|P29401|TKT_HUMAN TransketoLase OS=Homo sapiens GN=TKT PE=1 SV=3;>tr|Q53EM5|Q53EM5_HUMAN TransketoLase variant (Fragment) OS=Homo sapiens PE=2 SV=1;>tr|B4E022|B4E022_HUMAN TransketoLase OS=Homo sapiens GN=TKT PE=2 SV=1;>tr|B3KSI4|B3KSI4_HUMAN cDNA FLJ36	0.84671
Profilin-1	PFN1	>sp|P07737|PROF1_HUMAN ProfiLin-1 OS=Homo sapiens GN=PFN1 PE=1 SV=2;>tr|K7EJ44|K7EJ44_HUMAN ProfiLin 1, isoform CRA_b OS=Homo sapiens GN=PFN1 PE=4 SV=1	0.84854
Histone acetyltransferase type B catalytic subunit	HAT1	>sp|O14929|HAT1_HUMAN Histone acetyLtransferase type B cataLytic subunit OS=Homo sapiens GN=HAT1 PE=1 SV=1	0.85071
Talin-1	TLN1	>sp|Q9Y490|TLN1_HUMAN TaLin-1 OS=Homo sapiens GN=TLN1 PE=1 SV=3;>tr|Q5TCU6|Q5TCU6_HUMAN TaLin-1 OS=Homo sapiens GN=TLN1 PE=2 SV=1	0.8514
Cytochrome b-c1 complex subunit 2, mitochondrial	UQCRC2	>sp|P22695|QCR2_HUMAN Cytochrome b-c1 compLex subunit 2, mitochondriaL OS=Homo sapiens GN=UQCRC2 PE=1 SV=3;>tr|H3BRG4|H3BRG4_HUMAN Cytochrome b-c1 compLex subunit 2, mitochondriaL OS=Homo sapiens GN=UQCRC2 PE=2 SV=1	0.85184
Glycylpeptide N-tetradecanoyltransferase 1;Glycylpeptide N-tetradecanoyltransferase	NMT1;NMT	>sp|P30419|NMT1_HUMAN GLycyLpeptide N-tetradecanoyLtransferase 1 OS=Homo sapiens GN=NMT1 PE=1 SV=2;>tr|Q96HI4|Q96HI4_HUMAN GLycyLpeptide N-tetradecanoyLtransferase (Fragment) OS=Homo sapiens GN=NMT1 PE=2 SV=2;>tr|B7Z8J4|B7Z8J4_HUMAN GLycyLpeptide N-tetrade	0.85245
Tumor protein D54	TPD52L2;DKFZp686A1765	>tr|Q5JWU6|Q5JWU6_HUMAN Tumor protein D52-Like 2, isoform CRA_e OS=Homo sapiens GN=TPD52L2 PE=4 SV=1;>sp|O43399|TPD54_HUMAN Tumor protein D54 OS=Homo sapiens GN=TPD52L2 PE=1 SV=2;>tr|Q6FGS1|Q6FGS1_HUMAN TPD52L2 protein OS=Homo sapiens GN=TPD52L2 PE=2 SV=1;	0.85794
Malate dehydrogenase, mitochondrial;Malate dehydrogenase	MDH2	>sp|P40926|MDHM_HUMAN MaLate dehydrogenase, mitochondriaL OS=Homo sapiens GN=MDH2 PE=1 SV=3;>tr|Q6FHZ0|Q6FHZ0_HUMAN MaLate dehydrogenase OS=Homo sapiens GN=MDH2 PE=2 SV=1;>tr|Q75MT9|Q75MT9_HUMAN MaLate dehydrogenase (Fragment) OS=Homo sapiens GN=MDH2 PE=2	0.85809
Na(+)/H(+) exchange regulatory cofactor NHE-RF1	SLC9A3R1	>tr|B2R6A3|B2R6A3_HUMAN cDNA, FLJ92860, highLy simiLar to Homo sapiens soLute carrier famiLy 9 (sodium/hydrogen exchanger), member 3 reguLator 1 (SLC9A3R1), mRNA OS=Homo sapiens PE=2 SV=1;>sp|O14745|NHRF1_HUMAN Na(+)/H(+) exchange reguLatory cofactor NHE-R	0.85838
Endoplasmin	HSP90B1;TRA1	>sp|P14625|ENPL_HUMAN EndopLasmin OS=Homo sapiens GN=HSP90B1 PE=1 SV=1;>tr|Q5CAQ5|Q5CAQ5_HUMAN Tumor rejection antigen (Gp96) 1 OS=Homo sapiens GN=TRA1 PE=2 SV=1;>tr|B4DU71|B4DU71_HUMAN cDNA FLJ58626, highLy simiLar to EndopLasmin (Heat shock protein 90 kD	0.85953
Proteasome activator complex subunit 1	PSME1	>sp|Q06323|PSME1_HUMAN Proteasome activator compLex subunit 1 OS=Homo sapiens GN=PSME1 PE=1 SV=1;>tr|Q6FHU3|Q6FHU3_HUMAN PSME1 protein (Fragment) OS=Homo sapiens GN=PSME1 PE=2 SV=1;>tr|H0YNE3|H0YNE3_HUMAN Proteasome activator compLex subunit 1 OS=Homo sapi	0.86471
Crk-like protein	CRKL	>sp|P46109|CRKL_HUMAN Crk-Like protein OS=Homo sapiens GN=CRKL PE=1 SV=1	0.8653
Ubiquitin-conjugating enzyme E2 variant 1;Ubiquitin-conjugating enzyme E2 variant 2	TMEM189;UBE2V2;UBE2V1	>tr|G3V2F7|G3V2F7_HUMAN HCG2044781 OS=Homo sapiens GN=TMEM189 PE=4 SV=1;>tr|H0YBX6|H0YBX6_HUMAN Ubiquitin-conjugating enzyme E2 variant 2 (Fragment) OS=Homo sapiens GN=UBE2V2 PE=4 SV=1;>sp|Q13404|UB2V1_HUMAN Ubiquitin-conjugating enzyme E2 variant 1 OS=Hom	0.86617
Peptidyl-prolyl cis-trans isomerase;Peptidyl-prolyl cis-trans isomerase A	PPIA	>tr|A8K486|A8K486_HUMAN PeptidyL-proLyL cis-trans isomerase OS=Homo sapiens PE=2 SV=1;>sp|P62937|PPIA_HUMAN PeptidyL-proLyL cis-trans isomerase A OS=Homo sapiens GN=PPIA PE=1 SV=2;>tr|B2RE56|B2RE56_HUMAN PeptidyL-proLyL cis-trans isomerase OS=Homo sapiens	0.86822
Histone H3;Histone H3.1;Histone H3.3;Histone H3.1t;Histone H3.2;Histone H3.3C	H3F3B;HIST1H3A;H3F3A;HIST3H3;HIST2H3A;HIST2H3PS2;H3F3C	>tr|K7ES00|K7ES00_HUMAN Histone H3.3 (Fragment) OS=Homo sapiens GN=H3F3B PE=4 SV=1;>tr|B2R4P9|B2R4P9_HUMAN Histone H3 OS=Homo sapiens GN=H3F3B PE=2 SV=1;>tr|B2R6Y1|B2R6Y1_HUMAN Histone H3 OS=Homo sapiens PE=2 SV=1;>sp|P68431|H31_HUMAN Histone H3.1 OS=Homo	0.87193
Hepatoma-derived growth factor	HDGF	>tr|B7Z525|B7Z525_HUMAN cDNA FLJ55039, moderateLy simiLar to Hepatoma-derived growth factor OS=Homo sapiens PE=2 SV=1;>tr|B2RDE8|B2RDE8_HUMAN cDNA, FLJ96580, highLy simiLar to Homo sapiens hepatoma-derived growth factor (high-mobiLity group protein 1-Like)	0.87675
Quinone oxidoreductase	CRYZ	>sp|Q08257|QOR_HUMAN Quinone oxidoreductase OS=Homo sapiens GN=CRYZ PE=1 SV=1	0.88006
Serine hydroxymethyltransferase, mitochondrial;Serine hydroxymethyltransferase	SHMT2;DKFZp686P09201	>sp|P34897|GLYM_HUMAN Serine hydroxymethyLtransferase, mitochondriaL OS=Homo sapiens GN=SHMT2 PE=1 SV=3;>tr|Q53ET4|Q53ET4_HUMAN Serine hydroxymethyLtransferase (Fragment) OS=Homo sapiens PE=2 SV=1;>tr|B4DJQ3|B4DJQ3_HUMAN cDNA FLJ58535, highLy simiLar to Se	0.88081
Protein FAM194B	FAM194B;FLJ32682	>sp|Q5W0A0|F194B_HUMAN Protein FAM194B OS=Homo sapiens GN=FAM194B PE=1 SV=1;>tr|A2VDI6|A2VDI6_HUMAN FLJ32682 protein (Fragment) OS=Homo sapiens GN=FLJ32682 PE=2 SV=1	0.88226
Myotrophin	MTPN;DKFZp761E1322	>sp|P58546|MTPN_HUMAN Myotrophin OS=Homo sapiens GN=MTPN PE=1 SV=2;>tr|Q69YG1|Q69YG1_HUMAN Myotrophin OS=Homo sapiens GN=DKFZp761E1322 PE=2 SV=1;>tr|C9JL85|C9JL85_HUMAN Myotrophin OS=Homo sapiens GN=MTPN PE=2 SV=1	0.88266
Ran GTPase-activating protein 1	RANGAP1	>sp|P46060|RAGP1_HUMAN Ran GTPase-activating protein 1 OS=Homo sapiens GN=RANGAP1 PE=1 SV=1;>tr|B4DY16|B4DY16_HUMAN cDNA FLJ51385, highLy simiLar to Ran GTPase-activating protein 1 OS=Homo sapiens PE=2 SV=1;>tr|F8W7I9|F8W7I9_HUMAN Ran GTPase-activating pro	0.883
Actin, cytoplasmic 1;Actin, cytoplasmic 1, N-terminally processed;Actin, cytoplasmic 2;Actin, cytoplasmic 2, N-terminally processed;Actin, alpha cardiac muscle 1;Actin, alpha skeletal muscle;Actin, aortic smooth muscle;Actin, gamma-enteric smooth muscle;POTE ankyrin domain family member E	ACTB;ACTG1;PS1TP5BP1;ACTC1;ACTA1;ACTA2;ACTG2;POTEE	>P60712 SWISS-PROT:P60712 (Bos taurus) Actin, cytoplasmic 1;>gi|CON_IPI00698900.1|SWISS-PROT:P60712 (Bos taurus) Actin, cytopLasmic 1;>sp|P60709|ACTB_HUMAN Actin, cytopLasmic 1 OS=Homo sapiens GN=ACTB PE=1 SV=1;>sp|P63261|ACTG_HUMAN Actin, cytopLasmic 2 OS	0.88314
Guanine nucleotide-binding protein G(I)/G(S)/G(T) subunit beta-1	GNB1	>tr|B2R6K4|B2R6K4_HUMAN cDNA, FLJ92996, highLy simiLar to Homo sapiens guanine nucLeotide binding protein (G protein), beta poLypeptide 1 (GNB1), mRNA OS=Homo sapiens PE=2 SV=1;>sp|P62873|GBB1_HUMAN Guanine nucLeotide-binding protein G(I)/G(S)/G(T) subunit	0.88394
Putative ubiquitin-conjugating enzyme E2 N-like;Ubiquitin-conjugating enzyme E2 N	UBE2NL;UBE2N	>sp|Q5JXB2|UE2NL_HUMAN Putative ubiquitin-conjugating enzyme E2 N-Like OS=Homo sapiens GN=UBE2NL PE=1 SV=1;>sp|P61088|UBE2N_HUMAN Ubiquitin-conjugating enzyme E2 N OS=Homo sapiens GN=UBE2N PE=1 SV=1;>tr|F8VV71|F8VV71_HUMAN Ubiquitin-conjugating enzyme E2 N	0.88402
Ubiquitin thioesterase OTUB1	OTUB1;DKFZp564E242	>tr|B4DPD5|B4DPD5_HUMAN cDNA FLJ56307, highLy simiLar to Ubiquitin thioesterase protein OTUB1 (EC 3.4.-.-) OS=Homo sapiens PE=2 SV=1;>tr|J3KR44|J3KR44_HUMAN Ubiquitin thioesterase OTUB1 OS=Homo sapiens GN=OTUB1 PE=4 SV=1;>tr|F5GYJ8|F5GYJ8_HUMAN Ubiquitin t	0.88945
Aspartate aminotransferase, mitochondrial;Aspartate aminotransferase	GOT2	>sp|P00505|AATM_HUMAN Aspartate aminotransferase, mitochondriaL OS=Homo sapiens GN=GOT2 PE=1 SV=3;>tr|B4DJA6|B4DJA6_HUMAN Aspartate aminotransferase OS=Homo sapiens PE=2 SV=1;>tr|E7ERW2|E7ERW2_HUMAN Aspartate aminotransferase OS=Homo sapiens GN=GOT2 PE=2 S	0.89076
Stress-induced-phosphoprotein 1	STIP1	>tr|G3XAD8|G3XAD8_HUMAN Stress-induced-phosphoprotein 1 OS=Homo sapiens GN=STIP1 PE=4 SV=1;>tr|Q3ZCU9|Q3ZCU9_HUMAN STIP1 protein OS=Homo sapiens GN=STIP1 PE=2 SV=1;>tr|A8K690|A8K690_HUMAN cDNA FLJ76863, highLy simiLar to Homo sapiens stress-induced-phospho	0.89106
F-actin-capping protein subunit alpha-1	CAPZA1	>tr|A8K0T9|A8K0T9_HUMAN cDNA FLJ75422, highLy simiLar to Homo sapiens capping protein (actin fiLament) muscLe Z-Line, aLpha 1, mRNA OS=Homo sapiens PE=2 SV=1;>sp|P52907|CAZA1_HUMAN F-actin-capping protein subunit aLpha-1 OS=Homo sapiens GN=CAPZA1 PE=1 SV=3	0.89335
Cofilin-1	CFL1	>tr|E9PK25|E9PK25_HUMAN CofiLin-1 OS=Homo sapiens GN=CFL1 PE=2 SV=1;>sp|P23528|COF1_HUMAN CofiLin-1 OS=Homo sapiens GN=CFL1 PE=1 SV=3;>tr|G3V1A4|G3V1A4_HUMAN CofiLin 1 (Non-muscLe), isoform CRA_a OS=Homo sapiens GN=CFL1 PE=4 SV=1;>tr|E9PP50|E9PP50_HUMAN Co	0.89346
Guanine nucleotide-binding protein subunit beta-2-like 1	GNB2L1	>tr|D6REE5|D6REE5_HUMAN Guanine nucLeotide-binding protein subunit beta-2-Like 1 (Fragment) OS=Homo sapiens GN=GNB2L1 PE=2 SV=1;>tr|E9KL35|E9KL35_HUMAN Epididymis tissue sperm binding protein Li 3a OS=Homo sapiens PE=2 SV=1;>sp|P63244|GBLP_HUMAN Guanine nu	0.89372
Small nuclear ribonucleoprotein F	SNRPF	>sp|P62306|RUXF_HUMAN SmaLL nucLear ribonucLeoprotein F OS=Homo sapiens GN=SNRPF PE=1 SV=1	0.89417
Protein DEK	DEK;DKFZp686A24118	>sp|P35659|DEK_HUMAN Protein DEK OS=Homo sapiens GN=DEK PE=1 SV=1;>tr|B4DNW3|B4DNW3_HUMAN cDNA FLJ51914, highLy simiLar to Protein DEK OS=Homo sapiens PE=2 SV=1;>tr|B4DFG0|B4DFG0_HUMAN Protein DEK OS=Homo sapiens GN=DEK PE=2 SV=1;>tr|H0Y993|H0Y993_HUMAN Pr	0.89482
Peroxiredoxin-1	PRDX1	>sp|Q06830|PRDX1_HUMAN Peroxiredoxin-1 OS=Homo sapiens GN=PRDX1 PE=1 SV=1;>tr|B2R4P2|B2R4P2_HUMAN cDNA, FLJ92164, highLy simiLar to Homo sapiens peroxiredoxin 1 (PRDX1), mRNA OS=Homo sapiens PE=2 SV=1	0.89599
Macrophage migration inhibitory factor	MIF	>tr|I4AY87|I4AY87_HUMAN Macrophage migration inhibitory factor (Fragment) OS=Homo sapiens PE=2 SV=1;>sp|P14174|MIF_HUMAN Macrophage migration inhibitory factor OS=Homo sapiens GN=MIF PE=1 SV=4	0.89777
40S ribosomal protein S16	RPS16	>sp|P62249|RS16_HUMAN 40S ribosomaL protein S16 OS=Homo sapiens GN=RPS16 PE=1 SV=2;>tr|M0R210|M0R210_HUMAN 40S ribosomaL protein S16 OS=Homo sapiens GN=RPS16 PE=3 SV=1;>tr|Q6IPX4|Q6IPX4_HUMAN 40S ribosomaL protein S16 OS=Homo sapiens GN=RPS16 PE=2 SV=1;>tr	0.89844
Staphylococcal nuclease domain-containing protein 1	SND1	>tr|Q59FF0|Q59FF0_HUMAN EBNA-2 co-activator variant (Fragment) OS=Homo sapiens PE=2 SV=1;>sp|Q7KZF4|SND1_HUMAN StaphyLococcaL nucLease domain-containing protein 1 OS=Homo sapiens GN=SND1 PE=1 SV=1;>tr|B3KU67|B3KU67_HUMAN cDNA FLJ39264 fis, cLone OCBBF20096	0.90032
	UNC13B	>tr|B1AM27|B1AM27_HUMAN Protein unc-13 homoLog B OS=Homo sapiens GN=UNC13B PE=2 SV=1;>tr|F8W8M9|F8W8M9_HUMAN Protein unc-13 homoLog B OS=Homo sapiens GN=UNC13B PE=2 SV=1;>tr|Q2NKJ5|Q2NKJ5_HUMAN UNC13B protein OS=Homo sapiens GN=UNC13B PE=2 SV=1;>tr|I6L9J0|	0.90268
Up-regulated during skeletal muscle growth protein 5	USMG5	>sp|Q96IX5|USMG5_HUMAN Up-reguLated during skeLetaL muscLe growth protein 5 OS=Homo sapiens GN=USMG5 PE=1 SV=1	0.90308
60S ribosomal protein L7	RPL7;WUGSC:H_RG054D04.1	>sp|P18124|RL7_HUMAN 60S ribosomaL protein L7 OS=Homo sapiens GN=RPL7 PE=1 SV=1;>tr|O95036|O95036_HUMAN SimiLar to 60S ribosomaL protein L7; simiLar to P18124 (PID:d133021) OS=Homo sapiens GN=WUGSC:H_RG054D04.1 PE=3 SV=1;>tr|A8MUD9|A8MUD9_HUMAN 60S ribosom	0.90469
NSFL1 cofactor p47	NSFL1C	>tr|J3QK90|J3QK90_HUMAN NSFL1 cofactor p47 OS=Homo sapiens GN=NSFL1C PE=4 SV=1;>tr|Q53FE8|Q53FE8_HUMAN cDNA FLJ36526 fis, cLone TRACH2003347, highLy simiLar to NSFL1 cofactor p47 (Fragment) OS=Homo sapiens PE=2 SV=1;>tr|Q53FF5|Q53FF5_HUMAN p47 protein isof	0.90659
Fatty acid-binding protein, epidermal	FABP5	>tr|E7DVW5|E7DVW5_HUMAN Fatty acid binding protein 5 (Psoriasis-associated) OS=Homo sapiens GN=FABP5 PE=2 SV=1;>sp|Q01469|FABP5_HUMAN Fatty acid-binding protein, epidermaL OS=Homo sapiens GN=FABP5 PE=1 SV=3;>tr|I6L8B7|I6L8B7_HUMAN Fatty acid-binding protei	0.91504
Charged multivesicular body protein 4b	CHMP4B	>sp|Q9H444|CHM4B_HUMAN Charged muLtivesicuLar body protein 4b OS=Homo sapiens GN=CHMP4B PE=1 SV=1	0.91641
Eukaryotic translation initiation factor 2 subunit 2	EIF2S2	>tr|B5BU01|B5BU01_HUMAN Eukaryotic transLation initiation factor 2 beta OS=Homo sapiens GN=EIF2S2 PE=2 SV=1;>sp|P20042|IF2B_HUMAN Eukaryotic transLation initiation factor 2 subunit 2 OS=Homo sapiens GN=EIF2S2 PE=1 SV=2;>tr|Q6IBR8|Q6IBR8_HUMAN EIF2S2 protei	0.91862
Citrate synthase, mitochondrial;Citrate synthase	CS	>sp|O75390|CISY_HUMAN Citrate synthase, mitochondriaL OS=Homo sapiens GN=CS PE=1 SV=2;>tr|B4DJV2|B4DJV2_HUMAN Citrate synthase OS=Homo sapiens GN=CS PE=2 SV=1;>tr|B3KTN4|B3KTN4_HUMAN Citrate synthase OS=Homo sapiens PE=2 SV=1;>tr|Q0QEL2|Q0QEL2_HUMAN Citrat	0.91945
Cystatin-B	CSTB	>sp|P04080|CYTB_HUMAN Cystatin-B OS=Homo sapiens GN=CSTB PE=1 SV=2;>tr|Q76LA1|Q76LA1_HUMAN CSTB protein OS=Homo sapiens GN=CSTB PE=2 SV=1	0.91995
Transmembrane emp24 domain-containing protein 4	TMED4	>sp|Q7Z7H5|TMED4_HUMAN Transmembrane emp24 domain-containing protein 4 OS=Homo sapiens GN=TMED4 PE=1 SV=1	0.92032
Protein FAM49B	DKFZp686B04128;FAM49B	>tr|Q68D08|Q68D08_HUMAN Putative uncharacterized protein DKFZp686B04128 OS=Homo sapiens GN=DKFZp686B04128 PE=2 SV=1;>sp|Q9NUQ9|FA49B_HUMAN Protein FAM49B OS=Homo sapiens GN=FAM49B PE=1 SV=1;>tr|E5RI16|E5RI16_HUMAN Protein FAM49B (Fragment) OS=Homo sapiens	0.9217
ELAV-like protein 1;ELAV-like protein 4;ELAV-like protein 2	ELAVL1;ELAVL2;ELAVL4	>tr|B4DVB8|B4DVB8_HUMAN ELAV-Like protein 1 OS=Homo sapiens GN=ELAVL1 PE=2 SV=1;>sp|Q15717|ELAV1_HUMAN ELAV-Like protein 1 OS=Homo sapiens GN=ELAVL1 PE=1 SV=2;>tr|B1AM49|B1AM49_HUMAN ELAV-Like protein 2 OS=Homo sapiens GN=ELAVL2 PE=2 SV=1;>tr|B1APY8|B1APY8	0.92221
		>sp|Q96QH2|PRAM_HUMAN PML-RARA-reguLated adapter moLecuLe 1 OS=Homo sapiens GN=PRAM1 PE=1 SV=2;>tr|K4DI84|K4DI84_HUMAN PML-RARA reguLated adaptor moLecuLe 1, isoform CRA_b OS=Homo sapiens GN=PRAM1 PE=4 SV=1	0.92236
Tubulin beta-4B chain	TUBB4B;TUBB2C	>sp|P68371|TBB4B_HUMAN TubuLin beta-4B chain OS=Homo sapiens GN=TUBB4B PE=1 SV=1;>tr|Q8IWP6|Q8IWP6_HUMAN CLass IVb beta tubuLin OS=Homo sapiens PE=2 SV=1;>tr|Q8IZ29|Q8IZ29_HUMAN TubuLin, beta 2C OS=Homo sapiens GN=TUBB2C PE=2 SV=1;>tr|Q8N6N5|Q8N6N5_HUMAN T	0.92374
Histone H2B;Histone H2B type 1-K;Histone H2B type 1-J;Histone H2B type 1-O;Histone H2B type 1-B;Histone H2B type 1-D;Histone H2B type 1-C/E/F/G/I;Histone H2B type 2-E;Histone H2B type 2-F;Histone H2B type 1-H;Histone H2B type 1-N;Histone H2B type 1-M;Histone H2B type 1-L;Histone H2B type 3-B;Histone H2B type F-S;Histone H2B type 1-A	HIST2H2BF;HIST1H2BF;HIST1H2BK;HIST1H2BJ;HIST1H2BO;HIST1H2BB;HIST1H2BD;HIST1H2BC;HIST2H2BE;HIST1H2BH;HIST1H2BN;HIST1H2BM;HIST1H2BL;HIST3H2BB;H2BFS;HIST1H2BA	>tr|B4DR52|B4DR52_HUMAN Histone H2B OS=Homo sapiens GN=HIST2H2BF PE=2 SV=1;>tr|I6L9F7|I6L9F7_HUMAN Histone H2B (Fragment) OS=Homo sapiens GN=HIST1H2BM PE=2 SV=1;>tr|A8K9J7|A8K9J7_HUMAN Histone H2B OS=Homo sapiens PE=2 SV=1;>tr|B2R4S9|B2R4S9_HUMAN Histone H	0.92617
Myosin regulatory light chain 12B;Myosin regulatory light chain 12A	MYL12B;MYL12A;MRLC3	>tr|J3QRS3|J3QRS3_HUMAN Myosin reguLatory Light chain 12A OS=Homo sapiens GN=MYL12A PE=4 SV=1;>sp|O14950|ML12B_HUMAN Myosin reguLatory Light chain 12B OS=Homo sapiens GN=MYL12B PE=1 SV=2;>sp|P19105|ML12A_HUMAN Myosin reguLatory Light chain 12A OS=Homo sapi	0.9263
Glyoxylate reductase/hydroxypyruvate reductase	GRHPR	>tr|Q5M7Z5|Q5M7Z5_HUMAN GRHPR protein (Fragment) OS=Homo sapiens GN=GRHPR PE=2 SV=1;>sp|Q9UBQ7|GRHPR_HUMAN GLyoxyLate reductase/hydroxypyruvate reductase OS=Homo sapiens GN=GRHPR PE=1 SV=1	0.93052
BRI3-binding protein	BRI3BP	>sp|Q8WY22|BRI3B_HUMAN BRI3-binding protein OS=Homo sapiens GN=BRI3BP PE=1 SV=1	0.93108
Caprin-1	CAPRIN1	>sp|Q14444|CAPR1_HUMAN Caprin-1 OS=Homo sapiens GN=CAPRIN1 PE=1 SV=2;>tr|B3KXU8|B3KXU8_HUMAN cDNA FLJ46087 fis, cLone TESTI2009497, highLy simiLar to GPI-anchored protein p137 OS=Homo sapiens PE=2 SV=1;>tr|G3V153|G3V153_HUMAN Caprin-1 OS=Homo sapiens GN=CA	0.93201
60S ribosomal protein L10	RPL10	>sp|P27635|RL10_HUMAN 60S ribosomaL protein L10 OS=Homo sapiens GN=RPL10 PE=1 SV=4;>tr|F8W7C6|F8W7C6_HUMAN 60S ribosomaL protein L10 OS=Homo sapiens GN=RPL10 PE=2 SV=1	0.93241
60S ribosomal protein L15;Ribosomal protein L15	RPL15	>sp|P61313|RL15_HUMAN 60S ribosomaL protein L15 OS=Homo sapiens GN=RPL15 PE=1 SV=2;>tr|E7EQV9|E7EQV9_HUMAN RibosomaL protein L15 (Fragment) OS=Homo sapiens GN=RPL15 PE=2 SV=1;>tr|B4DLP4|B4DLP4_HUMAN RibosomaL protein L15 OS=Homo sapiens PE=2 SV=1;>tr|E7EX5	0.93337
Lupus La protein	SSB	>tr|B5BUB5|B5BUB5_HUMAN Autoantigen La (Fragment) OS=Homo sapiens GN=SSB PE=2 SV=1;>sp|P05455|LA_HUMAN Lupus La protein OS=Homo sapiens GN=SSB PE=1 SV=2;>tr|Q14730|Q14730_HUMAN La 4.1 protein (Fragment) OS=Homo sapiens PE=2 SV=1;>tr|Q9UMH5|Q9UMH5_HUMAN SS-	0.93432
Thioredoxin domain-containing protein 17	TXNDC17	>sp|Q9BRA2|TXD17_HUMAN Thioredoxin domain-containing protein 17 OS=Homo sapiens GN=TXNDC17 PE=1 SV=1;>tr|I3L3M7|I3L3M7_HUMAN Thioredoxin domain-containing protein 17 OS=Homo sapiens GN=TXNDC17 PE=2 SV=1;>tr|I3L0K2|I3L0K2_HUMAN Thioredoxin domain-containing	0.93451
Neutral alpha-glucosidase AB	GANAB	>tr|B4DJ30|B4DJ30_HUMAN cDNA FLJ61290, highLy simiLar to NeutraL aLpha-gLucosidase AB OS=Homo sapiens PE=2 SV=1;>sp|Q14697|GANAB_HUMAN NeutraL aLpha-gLucosidase AB OS=Homo sapiens GN=GANAB PE=1 SV=3;>tr|B4DSM6|B4DSM6_HUMAN cDNA FLJ54057, highLy simiLar to	0.93669
Proteasome subunit alpha type-5;Proteasome subunit alpha type	PSMA5	>sp|P28066|PSA5_HUMAN Proteasome subunit aLpha type-5 OS=Homo sapiens GN=PSMA5 PE=1 SV=3;>tr|Q5U0A0|Q5U0A0_HUMAN Proteasome subunit aLpha type OS=Homo sapiens PE=2 SV=1	0.93763
Puromycin-sensitive aminopeptidase;Puromycin-sensitive aminopeptidase-like protein	NPEPPS;NPEPPSL1	>sp|P55786|PSA_HUMAN Puromycin-sensitive aminopeptidase OS=Homo sapiens GN=NPEPPS PE=1 SV=2;>tr|B7Z899|B7Z899_HUMAN cDNA FLJ55506, highLy simiLar to Puromycin-sensitive aminopeptidase (EC3.4.11.-) OS=Homo sapiens PE=2 SV=1;>tr|E9PLK3|E9PLK3_HUMAN Puromycin	0.9422
Valine--tRNA ligase	VARS	>tr|B0V043|B0V043_HUMAN VaLine--tRNA Ligase OS=Homo sapiens GN=VARS PE=2 SV=1;>sp|P26640|SYVC_HUMAN VaLine--tRNA Ligase OS=Homo sapiens GN=VARS PE=1 SV=4	0.94228
Malate dehydrogenase, cytoplasmic;Malate dehydrogenase	MDH1	>sp|P40925|MDHC_HUMAN MaLate dehydrogenase, cytopLasmic OS=Homo sapiens GN=MDH1 PE=1 SV=4;>tr|B9A041|B9A041_HUMAN MaLate dehydrogenase, cytopLasmic OS=Homo sapiens GN=MDH1 PE=2 SV=1;>tr|B8ZZ51|B8ZZ51_HUMAN MaLate dehydrogenase, cytopLasmic OS=Homo sapiens	0.9444
EF-hand calcium-binding domain-containing protein 6	EFCAB6	>sp|Q5THR3|EFCB6_HUMAN EF-hand caLcium-binding domain-containing protein 6 OS=Homo sapiens GN=EFCAB6 PE=1 SV=1	0.94461
Heterogeneous nuclear ribonucleoproteins A2/B1	HNRNPA2B1	>sp|P22626|ROA2_HUMAN Heterogeneous nucLear ribonucLeoproteins A2/B1 OS=Homo sapiens GN=HNRNPA2B1 PE=1 SV=2;>tr|I6L957|I6L957_HUMAN HNRNPA2B1 protein OS=Homo sapiens GN=HNRNPA2B1 PE=2 SV=1	0.94522
Heat shock protein 75 kDa, mitochondrial	TRAP1	>sp|Q12931|TRAP1_HUMAN Heat shock protein 75 kDa, mitochondriaL OS=Homo sapiens GN=TRAP1 PE=1 SV=3;>tr|Q53FS6|Q53FS6_HUMAN TNF receptor-associated protein 1 variant (Fragment) OS=Homo sapiens PE=2 SV=1;>tr|Q53G55|Q53G55_HUMAN TNF receptor-associated protei	0.94556
Histidine triad nucleotide-binding protein 1	LOC346521;HINT1	>tr|A4D2H4|A4D2H4_HUMAN SimiLar to Histidine triad nucLeotide-binding protein 1 (Adenosine 5-monophosphoramidase) (Protein kinase C inhibitor 1) (Protein kinase C-interacting protein 1) (PKCI-1) OS=Homo sapiens GN=LOC346521 PE=4 SV=1;>sp|P49773|HINT1_HUMAN	0.94954
T-complex protein 1 subunit gamma	CCT3	>tr|Q59H77|Q59H77_HUMAN Chaperonin containing TCP1, subunit 3 (Gamma) variant (Fragment) OS=Homo sapiens PE=2 SV=1;>sp|P49368|TCPG_HUMAN T-compLex protein 1 subunit gamma OS=Homo sapiens GN=CCT3 PE=1 SV=4;>tr|Q2TU64|Q2TU64_HUMAN PIG48 OS=Homo sapiens PE=2	0.95016
Ubiquitin-like modifier-activating enzyme 1	UBA1	>sp|P22314|UBA1_HUMAN Ubiquitin-Like modifier-activating enzyme 1 OS=Homo sapiens GN=UBA1 PE=1 SV=3	0.95242
Putative RNA-binding protein Luc7-like 2	LUC7L2	>tr|B3KSL5|B3KSL5_HUMAN cDNA FLJ36545 fis, cLone TRACH2006670, highLy simiLar to RNA-binding protein Luc7-Like 2 OS=Homo sapiens PE=2 SV=1;>sp|Q9Y383|LC7L2_HUMAN Putative RNA-binding protein Luc7-Like 2 OS=Homo sapiens GN=LUC7L2 PE=1 SV=2;>tr|B3KRR1|B3KRR1	0.95303
Cytochrome c oxidase subunit 4 isoform 1, mitochondrial	COX4I1	>sp|P13073|COX41_HUMAN Cytochrome c oxidase subunit 4 isoform 1, mitochondriaL OS=Homo sapiens GN=COX4I1 PE=1 SV=1;>tr|H3BNV9|H3BNV9_HUMAN Cytochrome c oxidase subunit 4 isoform 1, mitochondriaL OS=Homo sapiens GN=COX4I1 PE=2 SV=1;>tr|H3BN72|H3BN72_HUMAN C	0.95395
High mobility group protein B1;Putative high mobility group protein B1-like 1	HMGB1;HMGB1P1;hCG_1991922	>sp|P09429|HMGB1_HUMAN High mobiLity group protein B1 OS=Homo sapiens GN=HMGB1 PE=1 SV=3;>tr|B3KQ05|B3KQ05_HUMAN cDNA FLJ32558 fis, cLone SPLEN1000143, highLy simiLar to High mobiLity group protein B1 OS=Homo sapiens PE=2 SV=1;>sp|B2RPK0|HGB1A_HUMAN Putati	0.95481
Calmodulin	CALM2;CALM1;CALM3	>tr|E7EMB3|E7EMB3_HUMAN CaLmoduLin OS=Homo sapiens GN=CALM2 PE=2 SV=1;>tr|H0Y7A7|H0Y7A7_HUMAN CaLmoduLin (Fragment) OS=Homo sapiens GN=CALM2 PE=2 SV=1;>tr|E7ETZ0|E7ETZ0_HUMAN CaLmoduLin OS=Homo sapiens GN=CALM1 PE=2 SV=1;>tr|B2RDW0|B2RDW0_HUMAN cDNA, FLJ96	0.95609
Helicase SKI2W	SKI2W;SKIV2L	>tr|O76046|O76046_HUMAN Putative RNA heLicase Ski2w OS=Homo sapiens GN=SKI2W PE=4 SV=1;>sp|Q15477|SKIV2_HUMAN HeLicase SKI2W OS=Homo sapiens GN=SKIV2L PE=1 SV=3;>tr|Q96BC0|Q96BC0_HUMAN SuperkiLLer viraLicidic activity 2-Like (S. cerevisiae) OS=Homo sapiens	0.9578
Alanine--tRNA ligase, cytoplasmic	AARS	>tr|B4DR45|B4DR45_HUMAN cDNA FLJ61339, highLy simiLar to ALanyL-tRNA synthetase (EC 6.1.1.7) OS=Homo sapiens PE=2 SV=1;>sp|P49588|SYAC_HUMAN ALanine--tRNA Ligase, cytopLasmic OS=Homo sapiens GN=AARS PE=1 SV=2;>tr|H3BPK7|H3BPK7_HUMAN ALanine--tRNA Ligase, c	0.95789
Non-histone chromosomal protein HMG-14	HMGN1;hCG_17955	>tr|A6NEL0|A6NEL0_HUMAN Non-histone chromosomaL protein HMG-14 OS=Homo sapiens GN=HMGN1 PE=2 SV=1;>sp|P05114|HMGN1_HUMAN Non-histone chromosomaL protein HMG-14 OS=Homo sapiens GN=HMGN1 PE=1 SV=3;>tr|Q3B790|Q3B790_HUMAN High-mobiLity group nucLeosome bindin	0.9589
Dolichyl-diphosphooligosaccharide--protein glycosyltransferase 48 kDa subunit	DDOST	>sp|P39656|OST48_HUMAN DoLichyL-diphosphooLigosaccharide--protein gLycosyLtransferase 48 kDa subunit OS=Homo sapiens GN=DDOST PE=1 SV=4;>tr|B4DLI2|B4DLI2_HUMAN cDNA FLJ55714, highLy simiLar to DoLichyL-diphosphooLigosaccharide--protein gLycosyLtransferase	0.96028
Collagen alpha-3(VI) chain	COL6A3;DKFZp686K04147	>tr|D9ZGF2|D9ZGF2_HUMAN CoLLagen, type VI, aLpha 3 OS=Homo sapiens GN=COL6A3 PE=2 SV=1;>sp|P12111|CO6A3_HUMAN CoLLagen aLpha-3(VI) chain OS=Homo sapiens GN=COL6A3 PE=1 SV=5;>tr|E9PCV6|E9PCV6_HUMAN CoLLagen aLpha-3(VI) chain OS=Homo sapiens GN=COL6A3 PE=2 S	0.96044
Serine/arginine-rich splicing factor 1	SRSF1	>tr|J3KTL2|J3KTL2_HUMAN Serine/arginine-rich-spLicing factor 1 OS=Homo sapiens GN=SRSF1 PE=4 SV=1;>sp|Q07955|SRSF1_HUMAN Serine/arginine-rich spLicing factor 1 OS=Homo sapiens GN=SRSF1 PE=1 SV=2;>tr|Q59FA2|Q59FA2_HUMAN SpLicing factor, arginine/serine-rich	0.96068
60 kDa heat shock protein, mitochondrial	HSPD1	>sp|P10809|CH60_HUMAN 60 kDa heat shock protein, mitochondriaL OS=Homo sapiens GN=HSPD1 PE=1 SV=2;>tr|B3GQS7|B3GQS7_HUMAN MitochondriaL heat shock 60kD protein 1 variant 1 OS=Homo sapiens GN=HSPD1 PE=2 SV=1;>tr|B7Z597|B7Z597_HUMAN cDNA FLJ54373, highLy sim	0.96197
60S ribosomal protein L30	RPL30	>sp|P62888|RL30_HUMAN 60S ribosomaL protein L30 OS=Homo sapiens GN=RPL30 PE=1 SV=2;>tr|E5RI99|E5RI99_HUMAN 60S ribosomaL protein L30 (Fragment) OS=Homo sapiens GN=RPL30 PE=2 SV=1	0.96264
Proteasome subunit beta type-6;Proteasome subunit beta type	PSMB6	>sp|P28072|PSB6_HUMAN Proteasome subunit beta type-6 OS=Homo sapiens GN=PSMB6 PE=1 SV=4;>tr|Q6IAT9|Q6IAT9_HUMAN Proteasome subunit beta type OS=Homo sapiens GN=PSMB6 PE=2 SV=1	0.964
Platelet-activating factor acetylhydrolase IB subunit gamma	PAFAH1B3	>sp|Q15102|PA1B3_HUMAN PLateLet-activating factor acetyLhydroLase IB subunit gamma OS=Homo sapiens GN=PAFAH1B3 PE=1 SV=1;>tr|M0R389|M0R389_HUMAN PLateLet-activating factor acetyLhydroLase IB subunit gamma (Fragment) OS=Homo sapiens GN=PAFAH1B3 PE=4 SV=1	0.96618
STE20/SPS1-related proline-alanine-rich protein kinase	STK39	>sp|Q9UEW8|STK39_HUMAN STE20/SPS1-reLated proLine-aLanine-rich protein kinase OS=Homo sapiens GN=STK39 PE=1 SV=3;>tr|Q6E0B2|Q6E0B2_HUMAN SmaLL intestine SPAK-Like kinase OS=Homo sapiens PE=2 SV=1	0.9689
Poly [ADP-ribose] polymerase 1	PARP1	>tr|B2R5W3|B2R5W3_HUMAN cDNA, FLJ92658, highLy simiLar to Homo sapiens poLy (ADP-ribose) poLymerase famiLy, member 1 (PARP1), mRNA OS=Homo sapiens PE=2 SV=1;>sp|P09874|PARP1_HUMAN PoLy [ADP-ribose] poLymerase 1 OS=Homo sapiens GN=PARP1 PE=1 SV=4;>tr|B4E0E1	0.96966
RuvB-like 1	RUVBL1	>tr|B5BUB1|B5BUB1_HUMAN RuvB-Like 1 (Fragment) OS=Homo sapiens GN=RUVBL1 PE=2 SV=1;>sp|Q9Y265|RUVB1_HUMAN RuvB-Like 1 OS=Homo sapiens GN=RUVBL1 PE=1 SV=1	0.97037
Guanine nucleotide-binding protein G(s) subunit alpha isoforms XLas;Guanine nucleotide-binding protein G(s) subunit alpha isoforms short;Guanine nucleotide-binding protein G(olf) subunit alpha;Guanine nucleotide-binding protein G(i) subunit alpha-2;Guanine nucleotide-binding protein G(t) subunit alpha-3;Guanine nucleotide-binding protein G(k) subunit alpha;Guanine nucleotide-binding protein G(o) …	GNAS;GNAL;GNAI2;GNAT3;GNAI3;GNAO1;GNAT2;GNAI1;GNAT1;WUGSC:H_LUCA16.1	>sp|Q5JWF2|GNAS1_HUMAN Guanine nucLeotide-binding protein G(s) subunit aLpha isoforms XLas OS=Homo sapiens GN=GNAS PE=1 SV=2;>sp|P63092|GNAS2_HUMAN Guanine nucLeotide-binding protein G(s) subunit aLpha isoforms short OS=Homo sapiens GN=GNAS PE=1 SV=1;>tr|A	0.97151
U1 small nuclear ribonucleoprotein 70 kDa	SNRNP70;DKFZp434N041	>tr|A8KAQ5|A8KAQ5_HUMAN cDNA FLJ77404, highLy simiLar to Homo sapiens smaLL nucLear ribonucLeoprotein 70kDa poLypeptide (RNP antigen) (SNRP70), transcript variant 1, mRNA OS=Homo sapiens PE=2 SV=1;>sp|P08621|RU17_HUMAN U1 smaLL nucLear ribonucLeoprotein 70	0.9716
Reticulon-4	RTN4	>sp|Q9NQC3|RTN4_HUMAN ReticuLon-4 OS=Homo sapiens GN=RTN4 PE=1 SV=2;>tr|F8W914|F8W914_HUMAN ReticuLon-4 OS=Homo sapiens GN=RTN4 PE=2 SV=1;>tr|Q6IPN0|Q6IPN0_HUMAN RTN4 protein OS=Homo sapiens GN=RTN4 PE=2 SV=1;>tr|Q53R94|Q53R94_HUMAN Putative uncharacterize	0.97332
Thioredoxin-related transmembrane protein 1	TMX1;TXNDC	>sp|Q9H3N1|TMX1_HUMAN Thioredoxin-reLated transmembrane protein 1 OS=Homo sapiens GN=TMX1 PE=1 SV=1;>tr|B4DZX7|B4DZX7_HUMAN Thioredoxin domain containing, isoform CRA_b OS=Homo sapiens GN=TXNDC PE=2 SV=1	0.97431
Protein S100-A11	S100A11	>sp|P31949|S10AB_HUMAN Protein S100-A11 OS=Homo sapiens GN=S100A11 PE=1 SV=2;>tr|B2R5H0|B2R5H0_HUMAN cDNA, FLJ92471, highLy simiLar to Homo sapiens S100 caLcium binding protein A11 (caLgizzarin) (S100A11), mRNA OS=Homo sapiens PE=4 SV=1	0.97452
Hypoxanthine-guanine phosphoribosyltransferase	HPRT1	>sp|P00492|HPRT_HUMAN Hypoxanthine-guanine phosphoribosyLtransferase OS=Homo sapiens GN=HPRT1 PE=1 SV=2;>tr|Q6LET3|Q6LET3_HUMAN HPRT1 protein (Fragment) OS=Homo sapiens GN=HPRT1 PE=2 SV=1	0.97923
2,4-dienoyl-CoA reductase, mitochondrial	DECR1;DECR	>sp|Q16698|DECR_HUMAN 2,4-dienoyL-CoA reductase, mitochondriaL OS=Homo sapiens GN=DECR1 PE=1 SV=1;>tr|B7Z6B8|B7Z6B8_HUMAN 2,4-dienoyL-CoA reductase, mitochondriaL OS=Homo sapiens GN=DECR1 PE=2 SV=1;>tr|E5RFV2|E5RFV2_HUMAN 2,4-dienoyL-CoA reductase, mitocho	0.97982
Heterogeneous nuclear ribonucleoprotein H3	HNRNPH3	>sp|P31942|HNRH3_HUMAN Heterogeneous nucLear ribonucLeoprotein H3 OS=Homo sapiens GN=HNRNPH3 PE=1 SV=2;>tr|Q53F48|Q53F48_HUMAN Heterogeneous nucLear ribonucLeoprotein H3 isoform a variant (Fragment) OS=Homo sapiens PE=2 SV=1;>tr|B4DHY1|B4DHY1_HUMAN Heterog	0.98195
Acidic leucine-rich nuclear phosphoprotein 32 family member A;Acidic leucine-rich nuclear phosphoprotein 32 family member B;Acidic leucine-rich nuclear phosphoprotein 32 family member C;Acidic leucine-rich nuclear phosphoprotein 32 family member D	ANP32A;ANP32B;ANP32C;ANP32D	>sp|P39687|AN32A_HUMAN Acidic Leucine-rich nucLear phosphoprotein 32 famiLy member A OS=Homo sapiens GN=ANP32A PE=1 SV=1;>tr|Q08AJ6|Q08AJ6_HUMAN ANP32A protein OS=Homo sapiens GN=ANP32A PE=2 SV=1;>tr|Q6PKH8|Q6PKH8_HUMAN ANP32A protein (Fragment) OS=Homo sa	0.98249
Mitochondrial carrier homolog 2	MTCH2	>tr|Q53G34|Q53G34_HUMAN MitochondriaL carrier homoLog 2 variant (Fragment) OS=Homo sapiens PE=2 SV=1;>sp|Q9Y6C9|MTCH2_HUMAN MitochondriaL carrier homoLog 2 OS=Homo sapiens GN=MTCH2 PE=1 SV=1	0.98412
Lamin-B1	LMNB1	>sp|P20700|LMNB1_HUMAN Lamin-B1 OS=Homo sapiens GN=LMNB1 PE=1 SV=2;>tr|E9PBF6|E9PBF6_HUMAN Lamin-B1 OS=Homo sapiens GN=LMNB1 PE=2 SV=1;>tr|Q6DC98|Q6DC98_HUMAN LMNB1 protein (Fragment) OS=Homo sapiens GN=LMNB1 PE=2 SV=1	0.98533
Cytochrome b-c1 complex subunit 7	UQCRB	>tr|B2R4A2|B2R4A2_HUMAN Cytochrome b-c1 compLex subunit 7 OS=Homo sapiens PE=3 SV=1;>sp|P14927|QCR7_HUMAN Cytochrome b-c1 compLex subunit 7 OS=Homo sapiens GN=UQCRB PE=1 SV=2	0.98583
60S ribosomal protein L9	RPL9	>sp|P32969|RL9_HUMAN 60S ribosomaL protein L9 OS=Homo sapiens GN=RPL9 PE=1 SV=1;>tr|Q53Z07|Q53Z07_HUMAN NPC-A-16 OS=Homo sapiens GN=RPL9 PE=2 SV=1;>tr|D6RAN4|D6RAN4_HUMAN 60S ribosomaL protein L9 (Fragment) OS=Homo sapiens GN=RPL9 PE=2 SV=1;>tr|B4DLV8|B4DL	0.98703
Probable ATP-dependent RNA helicase DDX17	DDX17	>tr|Q59F66|Q59F66_HUMAN DEAD box poLypeptide 17 isoform p82 variant (Fragment) OS=Homo sapiens PE=2 SV=1;>tr|H3BLZ8|H3BLZ8_HUMAN ProbabLe ATP-dependent RNA heLicase DDX17 OS=Homo sapiens GN=DDX17 PE=2 SV=1;>sp|Q92841|DDX17_HUMAN ProbabLe ATP-dependent RNA	0.98746
		>gi|CON_TRY1_BOVIN|SWISS-PROT:P00760 Cationic trypsin precursor (EC 3.4.21.4) (Beta-trypsin) [Contains: ALpha-trypsin chain 1; ALpha-trypsin chain 2] (Fragment) Reagent	0.98761
Chromobox protein homolog 1	CBX1	>sp|P83916|CBX1_HUMAN Chromobox protein homoLog 1 OS=Homo sapiens GN=CBX1 PE=1 SV=1;>tr|Q6IBN6|Q6IBN6_HUMAN CBX1 protein OS=Homo sapiens GN=CBX1 PE=2 SV=1;>tr|J3KS05|J3KS05_HUMAN Chromobox protein homoLog 1 (Fragment) OS=Homo sapiens GN=CBX1 PE=4 SV=1;>tr|	0.98815
Thioredoxin-like protein 1	TXNL1	>tr|B2R960|B2R960_HUMAN cDNA, FLJ94230, highLy simiLar to Homo sapiens thioredoxin-Like 1 (TXNL1), mRNA OS=Homo sapiens PE=2 SV=1;>sp|O43396|TXNL1_HUMAN Thioredoxin-Like protein 1 OS=Homo sapiens GN=TXNL1 PE=1 SV=3;>tr|K7EPB7|K7EPB7_HUMAN Thioredoxin-Like	0.98848
X-ray repair cross-complementing protein 5	XRCC5	>sp|P13010|XRCC5_HUMAN X-ray repair cross-compLementing protein 5 OS=Homo sapiens GN=XRCC5 PE=1 SV=3;>tr|Q53T09|Q53T09_HUMAN Putative uncharacterized protein XRCC5 (Fragment) OS=Homo sapiens GN=XRCC5 PE=2 SV=1	0.98917
F-actin-capping protein subunit beta	CAPZB	>tr|B1AK88|B1AK88_HUMAN Capping protein (Actin fiLament) muscLe Z-Line, beta, isoform CRA_d OS=Homo sapiens GN=CAPZB PE=4 SV=1;>tr|B2R7T8|B2R7T8_HUMAN cDNA, FLJ93598, highLy simiLar to Homo sapiens capping protein (actin fiLament) muscLe Z-Line, beta (CAPZ	0.98961
Myosin-10	MYH10	>tr|F8W6L6|F8W6L6_HUMAN Myosin-10 OS=Homo sapiens GN=MYH10 PE=2 SV=1;>tr|B2RWP9|B2RWP9_HUMAN MYH10 protein OS=Homo sapiens GN=MYH10 PE=2 SV=1;>sp|P35580|MYH10_HUMAN Myosin-10 OS=Homo sapiens GN=MYH10 PE=1 SV=3;>tr|D3DTS1|D3DTS1_HUMAN Myosin, heavy poLypept	0.99206
Fumarate hydratase, mitochondrial	FH	>tr|B1ANK7|B1ANK7_HUMAN Fumarate hydratase, isoform CRA_c OS=Homo sapiens GN=FH PE=2 SV=1;>sp|P07954|FUMH_HUMAN Fumarate hydratase, mitochondriaL OS=Homo sapiens GN=FH PE=1 SV=3	0.99284
ADP-ribosylation factor 3;ADP-ribosylation factor 1	ARF3;ARF1;ARF4	>sp|P61204|ARF3_HUMAN ADP-ribosyLation factor 3 OS=Homo sapiens GN=ARF3 PE=1 SV=2;>sp|P84077|ARF1_HUMAN ADP-ribosyLation factor 1 OS=Homo sapiens GN=ARF1 PE=1 SV=2;>tr|B4DN70|B4DN70_HUMAN cDNA FLJ51902, highLy simiLar to ADP-ribosyLation factor 1 OS=Homo s	0.99302
T-complex protein 1 subunit zeta	CCT6A	>tr|B2R9K8|B2R9K8_HUMAN cDNA, FLJ94440, highLy simiLar to Homo sapiens chaperonin containing TCP1, subunit 6A (zeta 1)(CCT6A), mRNA OS=Homo sapiens PE=2 SV=1;>sp|P40227|TCPZ_HUMAN T-compLex protein 1 subunit zeta OS=Homo sapiens GN=CCT6A PE=1 SV=3;>tr|Q59E	0.99479
Splicing factor U2AF 65 kDa subunit	U2AF2	>sp|P26368|U2AF2_HUMAN SpLicing factor U2AF 65 kDa subunit OS=Homo sapiens GN=U2AF2 PE=1 SV=4;>tr|B5BU25|B5BU25_HUMAN U2 smaLL nucLear RNA auxiLiary factor 2 isoform b OS=Homo sapiens GN=U2AF2 PE=2 SV=1;>tr|K7ENG2|K7ENG2_HUMAN SpLicing factor U2AF 65 kDa s	0.99529
60S acidic ribosomal protein P0;60S acidic ribosomal protein P0-like	RPLP0;RPLP0P6	>tr|A8K4Z4|A8K4Z4_HUMAN cDNA FLJ75549, highLy simiLar to Homo sapiens ribosomaL protein, Large, P0 (RPLP0), transcript variant 1, mRNA OS=Homo sapiens PE=2 SV=1;>sp|P05388|RLA0_HUMAN 60S acidic ribosomaL protein P0 OS=Homo sapiens GN=RPLP0 PE=1 SV=1;>tr|Q5	0.99531
Heterogeneous nuclear ribonucleoproteins C1/C2;Heterogeneous nuclear ribonucleoprotein C-like 1	HNRNPC;LOC440563;LOC649330;HNRNPCL1;HNRPCL1	>tr|A8K9A4|A8K9A4_HUMAN cDNA FLJ75154, highLy simiLar to Homo sapiens heterogeneous nucLear ribonucLeoprotein C (C1/C2), mRNA OS=Homo sapiens PE=2 SV=1;>sp|P07910|HNRPC_HUMAN Heterogeneous nucLear ribonucLeoproteins C1/C2 OS=Homo sapiens GN=HNRNPC PE=1 SV=	0.99587
40S ribosomal protein S8	RPS8	>sp|P62241|RS8_HUMAN 40S ribosomaL protein S8 OS=Homo sapiens GN=RPS8 PE=1 SV=2;>tr|Q5JR94|Q5JR94_HUMAN 40S ribosomaL protein S8 OS=Homo sapiens GN=RPS8 PE=2 SV=1;>tr|Q5JR95|Q5JR95_HUMAN 40S ribosomaL protein S8 OS=Homo sapiens GN=RPS8 PE=2 SV=1;>tr|Q9BS10	0.99824
Dolichyl-diphosphooligosaccharide--protein glycosyltransferase subunit 2	RPN2	>tr|B2RE46|B2RE46_HUMAN cDNA, FLJ96923, highLy simiLar to Homo sapiens ribophorin II (RPN2), mRNA OS=Homo sapiens PE=2 SV=1;>sp|P04844|RPN2_HUMAN DoLichyL-diphosphooLigosaccharide--protein gLycosyLtransferase subunit 2 OS=Homo sapiens GN=RPN2 PE=1 SV=3;>tr	0.99836
Exportin-2	CSE1L	>sp|P55060|XPO2_HUMAN Exportin-2 OS=Homo sapiens GN=CSE1L PE=1 SV=3;>tr|B4DM31|B4DM31_HUMAN cDNA FLJ54022, highLy simiLar to Exportin-2 OS=Homo sapiens PE=2 SV=1	0.99986
Peptidyl-prolyl cis-trans isomerase FKBP3;Peptidyl-prolyl cis-trans isomerase	FKBP3	>sp|Q00688|FKBP3_HUMAN PeptidyL-proLyL cis-trans isomerase FKBP3 OS=Homo sapiens GN=FKBP3 PE=1 SV=1;>tr|Q53GD8|Q53GD8_HUMAN PeptidyL-proLyL cis-trans isomerase (Fragment) OS=Homo sapiens PE=2 SV=1	1.0001
ADP-ribosylation factor 4	ARF4	>sp|P18085|ARF4_HUMAN ADP-ribosyLation factor 4 OS=Homo sapiens GN=ARF4 PE=1 SV=3;>tr|C9JPM4|C9JPM4_HUMAN ADP-ribosyLation factor 4 (Fragment) OS=Homo sapiens GN=ARF4 PE=2 SV=1;>tr|C9JAK5|C9JAK5_HUMAN ADP-ribosyLation factor 4 OS=Homo sapiens GN=ARF4 PE=2	1.0013
Peptidyl-prolyl cis-trans isomerase FKBP4;Peptidyl-prolyl cis-trans isomerase FKBP4, N-terminally processed	FKBP4	>tr|B2R9U2|B2R9U2_HUMAN cDNA, FLJ94557, highLy simiLar to Homo sapiens FK506 binding protein 4, 59kDa (FKBP4), mRNA OS=Homo sapiens PE=2 SV=1;>sp|Q02790|FKBP4_HUMAN PeptidyL-proLyL cis-trans isomerase FKBP4 OS=Homo sapiens GN=FKBP4 PE=1 SV=3;>tr|H0YFG2|H0Y	1.0049
Heat shock protein HSP 90-alpha	HSP90AA1	>tr|K9JA46|K9JA46_HUMAN Epididymis LuminaL secretory protein 52 OS=Homo sapiens GN=EL52 PE=2 SV=1;>sp|P07900|HS90A_HUMAN Heat shock protein HSP 90-aLpha OS=Homo sapiens GN=HSP90AA1 PE=1 SV=5;>tr|Q2VPJ6|Q2VPJ6_HUMAN HSP90AA1 protein (Fragment) OS=Homo sapie	1.0049
Trypsin-1;Alpha-trypsin chain 1;Alpha-trypsin chain 2	PRSS1;PRSS3	>tr|E7EQ64|E7EQ64_HUMAN Trypsin-1 OS=Homo sapiens GN=PRSS1 PE=2 SV=1;>tr|A1A508|A1A508_HUMAN PRSS3 protein OS=Homo sapiens GN=PRSS3 PE=2 SV=1;>P07477 SWISS-PROT:P07477 Tax_Id=9606 Gene_Symbol=PRSS1 Trypsin-1 precursor;>gi|CON_IPI00011694.1|SWISS-PROT:P0747	1.0055
Peroxiredoxin-6	PRDX6	>sp|P30041|PRDX6_HUMAN Peroxiredoxin-6 OS=Homo sapiens GN=PRDX6 PE=1 SV=3	1.0058
Programmed cell death protein 5	PDCD5	>tr|B4DE64|B4DE64_HUMAN Programmed ceLL death protein 5 OS=Homo sapiens GN=PDCD5 PE=2 SV=1;>sp|O14737|PDCD5_HUMAN Programmed ceLL death protein 5 OS=Homo sapiens GN=PDCD5 PE=1 SV=3;>tr|K7EL31|K7EL31_HUMAN Programmed ceLL death protein 5 OS=Homo sapiens GN=	1.0114
mRNA export factor	RAE1	>tr|E9PQ57|E9PQ57_HUMAN mRNA export factor OS=Homo sapiens GN=RAE1 PE=2 SV=1;>sp|P78406|RAE1L_HUMAN mRNA export factor OS=Homo sapiens GN=RAE1 PE=1 SV=1;>tr|Q5J8M4|Q5J8M4_HUMAN Migration-inducing gene 14 OS=Homo sapiens PE=2 SV=1;>tr|E9PPG9|E9PPG9_HUMAN mR	1.0116
Ras-related protein Rab-11B;Ras-related protein Rab-11A	RAB11B;RAB11A	>tr|B4DMN1|B4DMN1_HUMAN cDNA FLJ61136, highLy simiLar to Ras-reLated protein Rab-11A OS=Homo sapiens PE=2 SV=1;>tr|A5YM50|A5YM50_HUMAN RAB11B protein OS=Homo sapiens GN=RAB11B PE=2 SV=1;>sp|Q15907|RB11B_HUMAN Ras-reLated protein Rab-11B OS=Homo sapiens GN=	1.0119
Glucosidase 2 subunit beta	PRKCSH	>tr|B4DJQ5|B4DJQ5_HUMAN cDNA FLJ59211, highLy simiLar to GLucosidase 2 subunit beta OS=Homo sapiens PE=2 SV=1;>tr|K7ELL7|K7ELL7_HUMAN GLucosidase 2 subunit beta OS=Homo sapiens GN=PRKCSH PE=4 SV=1;>sp|P14314|GLU2B_HUMAN GLucosidase 2 subunit beta OS=Homo s	1.0134
	ESX1	>tr|A6ZIU1|A6ZIU1_HUMAN Extraembryonic spermatogenesis homeobox 1-Like protein (Fragment) OS=Homo sapiens GN=ESX1 PE=4 SV=1	1.0207
Serine/threonine-protein kinase OSR1	OXSR1	>sp|O95747|OXSR1_HUMAN Serine/threonine-protein kinase OSR1 OS=Homo sapiens GN=OXSR1 PE=1 SV=1	1.0211
Flap endonuclease 1	FEN1	>sp|P39748|FEN1_HUMAN FLap endonucLease 1 OS=Homo sapiens GN=FEN1 PE=1 SV=1;>tr|Q6FHX6|Q6FHX6_HUMAN FLap endonucLease 1 OS=Homo sapiens GN=FEN1 PE=2 SV=1;>tr|B4DWZ4|B4DWZ4_HUMAN FLap endonucLease 1 OS=Homo sapiens GN=FEN1 PE=2 SV=1;>tr|F5H1Y3|F5H1Y3_HUMAN	1.0221
		>sp|Q13422|IKZF1_HUMAN DNA-binding protein Ikaros OS=Homo sapiens GN=IKZF1 PE=1 SV=1;>sp|Q9UKT9|IKZF3_HUMAN Zinc finger protein AioLos OS=Homo sapiens GN=IKZF3 PE=1 SV=2;>tr|B4DVV5|B4DVV5_HUMAN Zinc finger protein AioLos OS=Homo sapiens GN=IKZF3 PE=2 SV=1;	1.0231
T-complex protein 1 subunit alpha	TCP1	>sp|P17987|TCPA_HUMAN T-compLex protein 1 subunit aLpha OS=Homo sapiens GN=TCP1 PE=1 SV=1;>tr|E7ERF2|E7ERF2_HUMAN T-compLex protein 1 subunit aLpha OS=Homo sapiens GN=TCP1 PE=2 SV=1;>tr|F5H136|F5H136_HUMAN T-compLex protein 1 subunit aLpha (Fragment) OS=Ho	1.0237
Elongation factor 1-alpha 1;Elongation factor 1-alpha;Putative elongation factor 1-alpha-like 3;Elongation factor 1-alpha 2	EEF1A1;EEF1A1P5;EEF1A1L14;EEF1A2;PTI-1	>sp|P68104|EF1A1_HUMAN ELongation factor 1-aLpha 1 OS=Homo sapiens GN=EEF1A1 PE=1 SV=1;>tr|Q53GE9|Q53GE9_HUMAN ELongation factor 1-aLpha (Fragment) OS=Homo sapiens PE=2 SV=1;>tr|Q53HM9|Q53HM9_HUMAN ELongation factor 1-aLpha (Fragment) OS=Homo sapiens PE=2	1.0241
Acidic leucine-rich nuclear phosphoprotein 32 family member E	ANP32E	>sp|Q9BTT0|AN32E_HUMAN Acidic Leucine-rich nucLear phosphoprotein 32 famiLy member E OS=Homo sapiens GN=ANP32E PE=1 SV=1;>tr|Q53F20|Q53F20_HUMAN Acidic (Leucine-rich) nucLear phosphoprotein 32 famiLy, member E variant (Fragment) OS=Homo sapiens PE=2 SV=1;>	1.0263
D-3-phosphoglycerate dehydrogenase	PHGDH;PGDH3	>sp|O43175|SERA_HUMAN D-3-phosphogLycerate dehydrogenase OS=Homo sapiens GN=PHGDH PE=1 SV=4;>tr|B3KSC3|B3KSC3_HUMAN cDNA FLJ35987 fis, cLone TESTI2014269, highLy simiLar to D-3-phosphogLycerate dehydrogenase (EC 1.1.1.95) OS=Homo sapiens PE=2 SV=1;>tr|Q5SZ	1.028
Protein SEC13 homolog	SEC13	>tr|B4DXJ1|B4DXJ1_HUMAN Protein SEC13 homoLog OS=Homo sapiens GN=SEC13 PE=2 SV=1;>sp|P55735|SEC13_HUMAN Protein SEC13 homoLog OS=Homo sapiens GN=SEC13 PE=1 SV=3;>tr|Q53GB2|Q53GB2_HUMAN SEC13-Like 1 isoform b variant (Fragment) OS=Homo sapiens PE=2 SV=1;>tr	1.0281
Serine/arginine-rich splicing factor 7	SRSF7	>sp|Q16629|SRSF7_HUMAN Serine/arginine-rich spLicing factor 7 OS=Homo sapiens GN=SRSF7 PE=1 SV=1;>tr|C9JAB2|C9JAB2_HUMAN Serine/arginine-rich-spLicing factor 7 OS=Homo sapiens GN=SRSF7 PE=2 SV=1;>tr|B4DEK2|B4DEK2_HUMAN cDNA FLJ59182, highLy simiLar to SpLi	1.0315
40S ribosomal protein S14	RPS14	>sp|P62263|RS14_HUMAN 40S ribosomaL protein S14 OS=Homo sapiens GN=RPS14 PE=1 SV=3	1.0321
Tubulin beta chain;Tubulin beta-2A chain;Tubulin beta-2B chain	TUBB;TUBB2A;TUBB2B	>sp|P07437|TBB5_HUMAN TubuLin beta chain OS=Homo sapiens GN=TUBB PE=1 SV=2;>tr|Q5SU16|Q5SU16_HUMAN Beta 5-tubuLin OS=Homo sapiens GN=TUBB PE=2 SV=1;>tr|Q5JP53|Q5JP53_HUMAN TubuLin beta chain OS=Homo sapiens GN=TUBB PE=3 SV=1;>tr|B7ZAF0|B7ZAF0_HUMAN cDNA, F	1.0329
Ras-related protein Rap-1b;Ras-related protein Rap-1A;Ras-related protein Rap-1b-like protein	RAP1B;RAP1A	>sp|P61224|RAP1B_HUMAN Ras-reLated protein Rap-1b OS=Homo sapiens GN=RAP1B PE=1 SV=1;>tr|F5H7Y6|F5H7Y6_HUMAN Ras-reLated protein Rap-1b OS=Homo sapiens GN=RAP1B PE=2 SV=1;>tr|E7ESV4|E7ESV4_HUMAN Ras-reLated protein Rap-1b (Fragment) OS=Homo sapiens GN=RAP1	1.034
RNA-binding motif protein, X chromosome;RNA-binding motif protein, X chromosome, N-terminally processed;RNA binding motif protein, X-linked-like-1;RNA binding motif protein, X-linked-like-1, N-terminally processed	RBMX;RBMXL1	>sp|P38159|RBMX_HUMAN RNA-binding motif protein, X chromosome OS=Homo sapiens GN=RBMX PE=1 SV=3;>sp|Q96E39|RMXL1_HUMAN RNA binding motif protein, X-Linked-Like-1 OS=Homo sapiens GN=RBMXL1 PE=1 SV=1;>tr|Q2VIN3|Q2VIN3_HUMAN RBM1 (Fragment) OS=Homo sapiens PE	1.0371
Coatomer subunit gamma-1;Coatomer subunit gamma-2;Coatomer subunit gamma	COPG1;COPG2;COPG	>sp|Q9Y678|COPG1_HUMAN Coatomer subunit gamma-1 OS=Homo sapiens GN=COPG1 PE=1 SV=1;>sp|Q9UBF2|COPG2_HUMAN Coatomer subunit gamma-2 OS=Homo sapiens GN=COPG2 PE=1 SV=1;>tr|Q9H9B7|Q9H9B7_HUMAN Coatomer subunit gamma OS=Homo sapiens PE=2 SV=1;>tr|Q2NLA0|Q2NLA0	1.0373
Tubulin alpha-1B chain;Tubulin alpha-1A chain;Tubulin alpha-1C chain;Tubulin alpha-4A chain;Tubulin alpha-3C/D chain;Tubulin alpha-3E chain	TUBA1B;TUBA1C;TUBA1A;TUBA4A;TUBA3C;TUBA2;TUBA3E	>sp|P68363|TBA1B_HUMAN TubuLin aLpha-1B chain OS=Homo sapiens GN=TUBA1B PE=1 SV=1;>tr|B3KT06|B3KT06_HUMAN cDNA FLJ37398 fis, cLone BRAMY2027467, highLy simiLar to TubuLin aLpha-ubiquitous chain OS=Homo sapiens PE=2 SV=1;>tr|A8JZY9|A8JZY9_HUMAN cDNA FLJ7858	1.0376
Inosine-5-monophosphate dehydrogenase 2	IMPDH2	>sp|P12268|IMDH2_HUMAN Inosine-5-monophosphate dehydrogenase 2 OS=Homo sapiens GN=IMPDH2 PE=1 SV=2;>tr|H0Y4R1|H0Y4R1_HUMAN Inosine-5-monophosphate dehydrogenase 2 (Fragment) OS=Homo sapiens GN=IMPDH2 PE=3 SV=1;>tr|B7Z1G4|B7Z1G4_HUMAN cDNA FLJ61601, highL	1.0387
60S ribosomal protein L5	RPL5	>tr|Q59GX9|Q59GX9_HUMAN RibosomaL protein L5 variant (Fragment) OS=Homo sapiens PE=2 SV=1;>tr|A2RUM7|A2RUM7_HUMAN RibosomaL protein L5 OS=Homo sapiens GN=RPL5 PE=2 SV=1;>sp|P46777|RL5_HUMAN 60S ribosomaL protein L5 OS=Homo sapiens GN=RPL5 PE=1 SV=3;>tr|B3K	1.0395
Ras-related protein Rab-1A;Putative Ras-related protein Rab-1C;Ras-related protein Rab-1B;Ras-related protein Rab-15;Ras-related protein Rab-8A;Ras-related protein Rab-8B;Ras-related protein Rab-13	RAB1A;RAB1B;RAB1C;RAB13;RAB15;RAB8A;RAB8B;hCG_1996054;RAB10	>sp|P62820|RAB1A_HUMAN Ras-reLated protein Rab-1A OS=Homo sapiens GN=RAB1A PE=1 SV=3;>tr|Q5U0I6|Q5U0I6_HUMAN RAB1A protein OS=Homo sapiens GN=RAB1A PE=2 SV=1;>tr|Q6FIG4|Q6FIG4_HUMAN RAB1B protein OS=Homo sapiens GN=RAB1B PE=2 SV=1;>sp|Q92928|RAB1C_HUMAN Pu	1.0397
Cytochrome c1, heme protein, mitochondrial	CYC1	>sp|P08574|CY1_HUMAN Cytochrome c1, heme protein, mitochondriaL OS=Homo sapiens GN=CYC1 PE=1 SV=3;>tr|Q8TBT6|Q8TBT6_HUMAN Putative uncharacterized protein (Fragment) OS=Homo sapiens PE=2 SV=1	1.0402
S-formylglutathione hydrolase	ESD	>sp|P10768|ESTD_HUMAN S-formyLgLutathione hydroLase OS=Homo sapiens GN=ESD PE=1 SV=2	1.0408
Peroxiredoxin-2	PRDX2	>sp|P32119|PRDX2_HUMAN Peroxiredoxin-2 OS=Homo sapiens GN=PRDX2 PE=1 SV=5;>tr|B4DF70|B4DF70_HUMAN cDNA FLJ60461, highLy simiLar to Peroxiredoxin-2 (EC 1.11.1.15) OS=Homo sapiens PE=2 SV=1	1.0432
14-3-3 protein gamma;14-3-3 protein gamma, N-terminally processed	YWHAG	>tr|B3KNB4|B3KNB4_HUMAN cDNA FLJ14168 fis, cLone NT2RP2001440, highLy simiLar to 14-3-3 protein gamma OS=Homo sapiens PE=2 SV=1;>sp|P61981|1433G_HUMAN 14-3-3 protein gamma OS=Homo sapiens GN=YWHAG PE=1 SV=2;>tr|B4DHC4|B4DHC4_HUMAN cDNA FLJ51843, highLy sim	1.044
Dolichyl-diphosphooligosaccharide--protein glycosyltransferase subunit 1	RPN1	>sp|P04843|RPN1_HUMAN DoLichyL-diphosphooLigosaccharide--protein gLycosyLtransferase subunit 1 OS=Homo sapiens GN=RPN1 PE=1 SV=1;>tr|Q53EP4|Q53EP4_HUMAN Ribophorin I variant (Fragment) OS=Homo sapiens PE=2 SV=1;>tr|Q6IBR0|Q6IBR0_HUMAN RPN1 protein OS=Homo	1.0442
Proteasomal ubiquitin receptor ADRM1	ADRM1;DKFZp686G2045	>sp|Q16186|ADRM1_HUMAN ProteasomaL ubiquitin receptor ADRM1 OS=Homo sapiens GN=ADRM1 PE=1 SV=2;>tr|Q68E00|Q68E00_HUMAN Putative uncharacterized protein DKFZp686G2045 (Fragment) OS=Homo sapiens GN=DKFZp686G2045 PE=4 SV=2	1.0447
HLA class I histocompatibility antigen, Cw-17 alpha chain;HLA class I histocompatibility antigen, Cw-7 alpha chain;HLA class I histocompatibility antigen, Cw-2 alpha chain;HLA class I histocompatibility antigen, Cw-8 alpha chain;HLA class I histocompatibility antigen, Cw-12 alpha chain;HLA class I histocompatibility antigen, Cw-15 alpha chain;HLA class I histocompatibility antigen, Cw-16 alpha ch…	HLA-C;HLA-Cw;HLA-A;HLA-A*02;HLA-A24AK;HLA-A*33;HLA-A*0226;HLA-B;MHC class I HLA-A;HLA-H;HLA;Cw;HLA-A*0201V3	>tr|F5GXA6|F5GXA6_HUMAN HLA cLass I histocompatibiLity antigen, Cw-14 aLpha chain OS=Homo sapiens GN=HLA-C PE=2 SV=1;>tr|B4DVY0|B4DVY0_HUMAN cDNA FLJ54183, highLy simiLar to HLA cLass I histocompatibiLity antigen, Cw-7 aLpha chain OS=Homo sapiens PE=2 SV=1	1.046
Tubulin-specific chaperone A	TBCA	>tr|B4DT30|B4DT30_HUMAN TubuLin-specific chaperone A OS=Homo sapiens GN=TBCA PE=2 SV=1;>tr|E5RJD8|E5RJD8_HUMAN TubuLin-specific chaperone A OS=Homo sapiens GN=TBCA PE=2 SV=1;>sp|O75347|TBCA_HUMAN TubuLin-specific chaperone A OS=Homo sapiens GN=TBCA PE=1 SV	1.0466
Phosphate carrier protein, mitochondrial	SLC25A3	>sp|Q00325|MPCP_HUMAN Phosphate carrier protein, mitochondriaL OS=Homo sapiens GN=SLC25A3 PE=1 SV=2;>tr|B2RE88|B2RE88_HUMAN cDNA, FLJ96465, highLy simiLar to Homo sapiens soLute carrier famiLy 25 (mitochondriaL carrier;phosphate carrier), member 3 (SLC25A3	1.0482
60S ribosomal protein L12	RPL12;hCG_21173	>tr|Q59FI9|Q59FI9_HUMAN RibosomaL protein L12 variant (Fragment) OS=Homo sapiens PE=2 SV=1;>sp|P30050|RL12_HUMAN 60S ribosomaL protein L12 OS=Homo sapiens GN=RPL12 PE=1 SV=1;>tr|D3DS95|D3DS95_HUMAN HCG21173, isoform CRA_a OS=Homo sapiens GN=hCG_21173 PE=4	1.0497
Annexin;Annexin A6	ANXA6	>tr|A8K3Q7|A8K3Q7_HUMAN Annexin OS=Homo sapiens PE=2 SV=1;>sp|P08133|ANXA6_HUMAN Annexin A6 OS=Homo sapiens GN=ANXA6 PE=1 SV=3;>tr|A6NN80|A6NN80_HUMAN Annexin OS=Homo sapiens GN=ANXA6 PE=3 SV=3;>tr|B7Z582|B7Z582_HUMAN cDNA FLJ53638, highLy simiLar to Annex	1.0537
Pre-mRNA-processing-splicing factor 8	PRPF8	>sp|Q6P2Q9|PRP8_HUMAN Pre-mRNA-processing-spLicing factor 8 OS=Homo sapiens GN=PRPF8 PE=1 SV=2;>tr|B4DK16|B4DK16_HUMAN cDNA FLJ57882, highLy simiLar to Pre-mRNA-processing-spLicing factor 8 OS=Homo sapiens PE=2 SV=1;>tr|Q53GM6|Q53GM6_HUMAN U5 snRNP-specifi	1.0537
Hsp90 co-chaperone Cdc37	CDC37;MBD5	>sp|Q16543|CDC37_HUMAN Hsp90 co-chaperone Cdc37 OS=Homo sapiens GN=CDC37 PE=1 SV=1;>tr|Q6FG59|Q6FG59_HUMAN CDC37 protein OS=Homo sapiens GN=CDC37 PE=2 SV=1;>tr|K7EKQ2|K7EKQ2_HUMAN Hsp90 co-chaperone Cdc37 (Fragment) OS=Homo sapiens GN=CDC37 PE=4 SV=1;>tr|K	1.0542
C-1-tetrahydrofolate synthase, cytoplasmic;Methylenetetrahydrofolate dehydrogenase;Methenyltetrahydrofolate cyclohydrolase;Formyltetrahydrofolate synthetase	MTHFD1	>tr|B7Z809|B7Z809_HUMAN cDNA FLJ56016, highLy simiLar to C-1-tetrahydrofoLate synthase, cytopLasmic OS=Homo sapiens PE=2 SV=1;>tr|F5H2F4|F5H2F4_HUMAN C-1-tetrahydrofoLate synthase, cytopLasmic OS=Homo sapiens GN=MTHFD1 PE=2 SV=1;>tr|G3V2B8|G3V2B8_HUMAN C-1	1.0557
Transaldolase	TALDO1	>sp|P37837|TALDO_HUMAN TransaLdoLase OS=Homo sapiens GN=TALDO1 PE=1 SV=2;>tr|F2Z393|F2Z393_HUMAN TransaLdoLase OS=Homo sapiens GN=TALDO1 PE=2 SV=1;>tr|B4DID5|B4DID5_HUMAN TransaLdoLase 1, isoform CRA_c OS=Homo sapiens GN=TALDO1 PE=2 SV=1	1.0575
60S ribosomal protein L23	RPL23	>sp|P62829|RL23_HUMAN 60S ribosomaL protein L23 OS=Homo sapiens GN=RPL23 PE=1 SV=1;>tr|Q9BTQ7|Q9BTQ7_HUMAN SimiLar to ribosomaL protein L23 (Fragment) OS=Homo sapiens PE=2 SV=1;>tr|J3KTJ3|J3KTJ3_HUMAN 60S ribosomaL protein L23 OS=Homo sapiens GN=RPL23 PE=3	1.0591
40S ribosomal protein S12	RPS12	>sp|P25398|RS12_HUMAN 40S ribosomaL protein S12 OS=Homo sapiens GN=RPS12 PE=1 SV=3	1.0592
6-phosphogluconate dehydrogenase, decarboxylating	PGD	>sp|P52209|6PGD_HUMAN 6-phosphogLuconate dehydrogenase, decarboxyLating OS=Homo sapiens GN=PGD PE=1 SV=3;>tr|B4DQJ8|B4DQJ8_HUMAN 6-phosphogLuconate dehydrogenase, decarboxyLating OS=Homo sapiens GN=PGD PE=2 SV=1;>tr|B4E2U0|B4E2U0_HUMAN 6-phosphogLuconate d	1.0619
Heterogeneous nuclear ribonucleoprotein Q	SYNCRIP	>tr|B2R8Z8|B2R8Z8_HUMAN cDNA, FLJ94136, highLy simiLar to Homo sapiens synaptotagmin binding, cytopLasmic RNA interacting protein (SYNCRIP), mRNA OS=Homo sapiens PE=2 SV=1;>sp|O60506|HNRPQ_HUMAN Heterogeneous nucLear ribonucLeoprotein Q OS=Homo sapiens GN=	1.0624
Myosin-9	MYH9	>sp|P35579|MYH9_HUMAN Myosin-9 OS=Homo sapiens GN=MYH9 PE=1 SV=4;>tr|Q60FE2|Q60FE2_HUMAN MYH9 variant protein OS=Homo sapiens GN=MYH9 PE=2 SV=1;>tr|Q86XU5|Q86XU5_HUMAN MYH9 protein (Fragment) OS=Homo sapiens GN=MYH9 PE=2 SV=1	1.063
Cytochrome c oxidase subunit 5B, mitochondrial	COX5B	>sp|P10606|COX5B_HUMAN Cytochrome c oxidase subunit 5B, mitochondriaL OS=Homo sapiens GN=COX5B PE=1 SV=2;>tr|Q6FHJ9|Q6FHJ9_HUMAN COX5B protein (Fragment) OS=Homo sapiens GN=COX5B PE=2 SV=1;>tr|Q6FHM4|Q6FHM4_HUMAN COX5B protein OS=Homo sapiens GN=COX5B PE=2	1.0632
Probable ATP-dependent RNA helicase DDX6	DDX6	>sp|P26196|DDX6_HUMAN ProbabLe ATP-dependent RNA heLicase DDX6 OS=Homo sapiens GN=DDX6 PE=1 SV=2;>tr|B2R858|B2R858_HUMAN cDNA, FLJ93750, Homo sapiens DEAD (Asp-GLu-ALa-Asp) box poLypeptide 6 (DDX6), mRNA OS=Homo sapiens PE=2 SV=1;>tr|Q8IV96|Q8IV96_HUMAN DD	1.0641
Rho GDP-dissociation inhibitor 1	ARHGDIA	>tr|J3QQX2|J3QQX2_HUMAN Rho GDP-dissociation inhibitor 1 OS=Homo sapiens GN=ARHGDIA PE=4 SV=1;>sp|P52565|GDIR1_HUMAN Rho GDP-dissociation inhibitor 1 OS=Homo sapiens GN=ARHGDIA PE=1 SV=3;>tr|J3KTF8|J3KTF8_HUMAN Rho GDP-dissociation inhibitor 1 (Fragment) O	1.0675
Heterogeneous nuclear ribonucleoprotein R	HNRNPR;DKFZp686A13234;HNRPR	>tr|B2R7W4|B2R7W4_HUMAN cDNA, FLJ93632, highLy simiLar to Homo sapiens heterogeneous nucLear ribonucLeoprotein R (HNRPR), mRNA OS=Homo sapiens PE=2 SV=1;>sp|O43390|HNRPR_HUMAN Heterogeneous nucLear ribonucLeoprotein R OS=Homo sapiens GN=HNRNPR PE=1 SV=1;>t	1.0678
60S acidic ribosomal protein P2	RPLP2	>sp|P05387|RLA2_HUMAN 60S acidic ribosomaL protein P2 OS=Homo sapiens GN=RPLP2 PE=1 SV=1;>tr|H0YDD8|H0YDD8_HUMAN 60S acidic ribosomaL protein P2 (Fragment) OS=Homo sapiens GN=RPLP2 PE=3 SV=1	1.0687
Splicing factor 3B subunit 1	SF3B1	>sp|O75533|SF3B1_HUMAN SpLicing factor 3B subunit 1 OS=Homo sapiens GN=SF3B1 PE=1 SV=3;>tr|Q7Z497|Q7Z497_HUMAN SF3B1 protein (Fragment) OS=Homo sapiens GN=SF3B1 PE=2 SV=1;>tr|A0PJH5|A0PJH5_HUMAN SF3B1 protein (Fragment) OS=Homo sapiens GN=SF3B1 PE=2 SV=1;>	1.069
DNA replication licensing factor MCM4	MCM4	>tr|B3KMX0|B3KMX0_HUMAN cDNA FLJ12837 fis, cLone NT2RP2003228, highLy simiLar to DNA repLication Licensing factor MCM4 OS=Homo sapiens PE=2 SV=1;>sp|P33991|MCM4_HUMAN DNA repLication Licensing factor MCM4 OS=Homo sapiens GN=MCM4 PE=1 SV=5;>tr|B4DLA6|B4DLA6	1.0695
T-complex protein 1 subunit theta	CCT8	>sp|P50990|TCPQ_HUMAN T-compLex protein 1 subunit theta OS=Homo sapiens GN=CCT8 PE=1 SV=4;>tr|Q53HU0|Q53HU0_HUMAN Chaperonin containing TCP1, subunit 8 (Theta) variant (Fragment) OS=Homo sapiens PE=2 SV=1;>tr|B4DEM7|B4DEM7_HUMAN T-compLex protein 1 subunit	1.0698
Protein FAM127C	FAM127C	>sp|Q17RB0|F127C_HUMAN Protein FAM127C OS=Homo sapiens GN=FAM127C PE=2 SV=1	1.0716
Leucine-rich repeat flightless-interacting protein 1	LRRFIP1	>sp|Q32MZ4|LRRF1_HUMAN Leucine-rich repeat fLightLess-interacting protein 1 OS=Homo sapiens GN=LRRFIP1 PE=1 SV=2	1.0718
Far upstream element-binding protein 2	KHSRP	>sp|Q92945|FUBP2_HUMAN Far upstream eLement-binding protein 2 OS=Homo sapiens GN=KHSRP PE=1 SV=4;>tr|B4DV73|B4DV73_HUMAN cDNA FLJ51330, highLy simiLar to Far upstream eLement-binding protein 2 OS=Homo sapiens PE=2 SV=1	1.0731
Glutathione S-transferase P	GSTP1	>sp|P09211|GSTP1_HUMAN GLutathione S-transferase P OS=Homo sapiens GN=GSTP1 PE=1 SV=2;>tr|A8MX94|A8MX94_HUMAN GLutathione S-transferase P OS=Homo sapiens GN=GSTP1 PE=2 SV=1;>tr|C7DJS1|C7DJS1_HUMAN GLutathione S-transferase pi (Fragment) OS=Homo sapiens GN=	1.0735
BolA-like protein 2	BOLA2B;BOLA2	>tr|H3BVE0|H3BVE0_HUMAN Protein LOC101060252 (Fragment) OS=Homo sapiens GN=LOC101060252 PE=3 SV=1;>tr|H3BTW0|H3BTW0_HUMAN Protein LOC101060252 (Fragment) OS=Homo sapiens GN=LOC101060252 PE=2 SV=1;>tr|H3BV85|H3BV85_HUMAN BoLA-Like protein 2 (Fragment) OS=Ho	1.0748
Plasminogen activator inhibitor 1 RNA-binding protein	SERBP1;DKFZp686P17171	>tr|D3DQ70|D3DQ70_HUMAN SERPINE1 mRNA binding protein 1, isoform CRA_d OS=Homo sapiens GN=SERBP1 PE=2 SV=1;>tr|D3DQ69|D3DQ69_HUMAN SERPINE1 mRNA binding protein 1, isoform CRA_c OS=Homo sapiens GN=SERBP1 PE=2 SV=1;>sp|Q8NC51|PAIRB_HUMAN PLasminogen activat	1.0762
Lysosome-associated membrane glycoprotein 1	LAMP1	>sp|P11279|LAMP1_HUMAN Lysosome-associated membrane gLycoprotein 1 OS=Homo sapiens GN=LAMP1 PE=1 SV=3;>tr|B3KRY3|B3KRY3_HUMAN cDNA FLJ35079 fis, cLone PLACE6005283, highLy simiLar to Lysosome-associated membrane gLycoprotein 1 OS=Homo sapiens PE=2 SV=1;>tr	1.0767
Clathrin heavy chain 1;Clathrin heavy chain 2	CLTC;CLTCL1	>sp|Q00610|CLH1_HUMAN CLathrin heavy chain 1 OS=Homo sapiens GN=CLTC PE=1 SV=5;>sp|P53675|CLH2_HUMAN CLathrin heavy chain 2 OS=Homo sapiens GN=CLTCL1 PE=1 SV=2;>tr|J3KR87|J3KR87_HUMAN CLathrin heavy chain 2 OS=Homo sapiens GN=CLTCL1 PE=4 SV=1	1.0768
60S ribosomal protein L36	RPL36	>sp|Q9Y3U8|RL36_HUMAN 60S ribosomaL protein L36 OS=Homo sapiens GN=RPL36 PE=1 SV=3;>tr|J3QSB5|J3QSB5_HUMAN 60S ribosomaL protein L36 OS=Homo sapiens GN=RPL36 PE=3 SV=1	1.0775
40S ribosomal protein S3	RPS3	>sp|P23396|RS3_HUMAN 40S ribosomaL protein S3 OS=Homo sapiens GN=RPS3 PE=1 SV=2;>tr|Q53G83|Q53G83_HUMAN RibosomaL protein S3 variant (Fragment) OS=Homo sapiens PE=2 SV=1;>tr|E9PL09|E9PL09_HUMAN 40S ribosomaL protein S3 OS=Homo sapiens GN=RPS3 PE=2 SV=1;>tr	1.0779
Cleavage and polyadenylation specificity factor subunit 6	CPSF6	>sp|Q16630|CPSF6_HUMAN CLeavage and poLyadenyLation specificity factor subunit 6 OS=Homo sapiens GN=CPSF6 PE=1 SV=2;>tr|F8WJN3|F8WJN3_HUMAN CLeavage and poLyadenyLation-specificity factor subunit 6 OS=Homo sapiens GN=CPSF6 PE=2 SV=1;>tr|B4DSU9|B4DSU9_HUMAN	1.083
T-complex protein 1 subunit eta	CCT7	>tr|Q53HV2|Q53HV2_HUMAN Chaperonin containing TCP1, subunit 7 (Eta) variant (Fragment) OS=Homo sapiens PE=2 SV=1;>tr|Q6IBT3|Q6IBT3_HUMAN CCT7 protein OS=Homo sapiens GN=CCT7 PE=2 SV=1;>sp|Q99832|TCPH_HUMAN T-compLex protein 1 subunit eta OS=Homo sapiens GN	1.0846
Heat shock 70 kDa protein 4	HSPA4	>tr|B4DH02|B4DH02_HUMAN cDNA FLJ50510, highLy simiLar to Heat shock 70 kDa protein 4 OS=Homo sapiens PE=2 SV=1;>sp|P34932|HSP74_HUMAN Heat shock 70 kDa protein 4 OS=Homo sapiens GN=HSPA4 PE=1 SV=4;>tr|B4DUS3|B4DUS3_HUMAN cDNA FLJ50691, highLy simiLar to He	1.0861
Eukaryotic translation initiation factor 6	EIF6	>sp|P56537|IF6_HUMAN Eukaryotic transLation initiation factor 6 OS=Homo sapiens GN=EIF6 PE=1 SV=1;>tr|B7ZBH1|B7ZBH1_HUMAN Eukaryotic transLation initiation factor 6 (Fragment) OS=Homo sapiens GN=EIF6 PE=2 SV=1	1.0876
RuvB-like 2	RUVBL2	>sp|Q9Y230|RUVB2_HUMAN RuvB-Like 2 OS=Homo sapiens GN=RUVBL2 PE=1 SV=3;>tr|B4DW30|B4DW30_HUMAN cDNA FLJ56743, highLy simiLar to RuvB-Like 2 (EC 3.6.1.-) OS=Homo sapiens PE=2 SV=1;>tr|B3KNL2|B3KNL2_HUMAN RuvB-Like 2 (E. coLi), isoform CRA_d OS=Homo sapiens	1.0882
Uncharacterized protein C21orf56	C21orf56	>sp|Q9H0A9|SPC1L_HUMAN SperioLin-Like protein OS=Homo sapiens GN=SPATC1L PE=2 SV=3	1.0883
Putative heat shock protein HSP 90-beta 4	HSP90AB4P	>sp|Q58FF6|H90B4_HUMAN Putative heat shock protein HSP 90-beta 4 OS=Homo sapiens GN=HSP90AB4P PE=5 SV=1	1.0915
Nascent polypeptide-associated complex subunit alpha	NACA;hCG_2016482	>tr|E9PAV3|E9PAV3_HUMAN Nascent poLypeptide-associated compLex subunit aLpha OS=Homo sapiens GN=NACA PE=2 SV=1;>tr|B2R4P8|B2R4P8_HUMAN HCG2016482, isoform CRA_b OS=Homo sapiens GN=hCG_2016482 PE=2 SV=1;>sp|Q13765|NACA_HUMAN Nascent poLypeptide-associated c	1.0937
Cytochrome c oxidase subunit 7A2, mitochondrial	COX7A2	>tr|H0UI06|H0UI06_HUMAN Cytochrome c oxidase subunit 7A2, mitochondriaL OS=Homo sapiens GN=COX7A2 PE=4 SV=1;>tr|D6RGV5|D6RGV5_HUMAN Cytochrome c oxidase subunit 7A2, mitochondriaL (Fragment) OS=Homo sapiens GN=COX7A2 PE=2 SV=1;>tr|D6RIE3|D6RIE3_HUMAN Cytoc	1.0937
U2 small nuclear ribonucleoprotein B;U1 small nuclear ribonucleoprotein A	SNRPB2;SNRPA	>tr|B5BTZ8|B5BTZ8_HUMAN SmaLL nucLear ribonucLeoprotein poLypeptide B OS=Homo sapiens GN=SNRPB2 PE=2 SV=1;>sp|P08579|RU2B_HUMAN U2 smaLL nucLear ribonucLeoprotein B OS=Homo sapiens GN=SNRPB2 PE=1 SV=1;>tr|B2R802|B2R802_HUMAN cDNA, FLJ93681, highLy simi	1.0939
40S ribosomal protein S26;Putative 40S ribosomal protein S26-like 1	RPS26;RPS26P11	>sp|P62854|RS26_HUMAN 40S ribosomaL protein S26 OS=Homo sapiens GN=RPS26 PE=1 SV=3;>sp|Q5JNZ5|RS26L_HUMAN Putative 40S ribosomaL protein S26-Like 1 OS=Homo sapiens GN=RPS26P11 PE=5 SV=1;>tr|Q75MH1|Q75MH1_HUMAN HCG1745083 OS=Homo sapiens GN=RPS26 PE=4 SV=1;	1.095
Heterogeneous nuclear ribonucleoprotein H;Heterogeneous nuclear ribonucleoprotein H, N-terminally processed;Heterogeneous nuclear ribonucleoprotein H2	HNRNPH1;HNRNPH2	>tr|G8JLB6|G8JLB6_HUMAN Heterogeneous nucLear ribonucLeoprotein H OS=Homo sapiens GN=HNRNPH1 PE=2 SV=1;>sp|P31943|HNRH1_HUMAN Heterogeneous nucLear ribonucLeoprotein H OS=Homo sapiens GN=HNRNPH1 PE=1 SV=4;>tr|E9PCY7|E9PCY7_HUMAN Heterogeneous nucLear ribon	1.096
Myosin light polypeptide 6;Myosin light chain 6B	MYL6;MYL6B	>tr|B7Z6Z4|B7Z6Z4_HUMAN Myosin Light poLypeptide 6 OS=Homo sapiens GN=MYL6 PE=2 SV=1;>tr|G3V1V0|G3V1V0_HUMAN Myosin Light poLypeptide 6 OS=Homo sapiens GN=MYL6 PE=4 SV=1;>tr|G8JLA2|G8JLA2_HUMAN Myosin Light poLypeptide 6 OS=Homo sapiens GN=MYL6 PE=2 SV=1;>	1.1001
Multifunctional protein ADE2;Phosphoribosylaminoimidazole-succinocarboxamide synthase;Phosphoribosylaminoimidazole carboxylase;Phosphoribosylaminoimidazole-succinocarboxamide synthase	PAICS	>sp|P22234|PUR6_HUMAN MuLtifunctionaL protein ADE2 OS=Homo sapiens GN=PAICS PE=1 SV=3;>tr|E9PBS1|E9PBS1_HUMAN PhosphoribosyLaminoimidazoLe carboxyLase (Fragment) OS=Homo sapiens GN=PAICS PE=2 SV=1;>tr|B4DGX3|B4DGX3_HUMAN PhosphoribosyLaminoimidazoLe-succin	1.1005
Cytochrome c oxidase subunit 2	COX2;COII;MT-CO2	>tr|H9STE0|H9STE0_HUMAN Cytochrome c oxidase subunit 2 OS=Homo sapiens GN=COX2 PE=3 SV=1;>tr|A0S2P1|A0S2P1_HUMAN Cytochrome c oxidase subunit 2 OS=Homo sapiens GN=COX2 PE=3 SV=1;>tr|A0S3T1|A0S3T1_HUMAN Cytochrome c oxidase subunit 2 OS=Homo sapiens GN=COX2	1.101
Ras GTPase-activating-like protein IQGAP1	IQGAP1	>tr|A4QPB0|A4QPB0_HUMAN IQ motif containing GTPase activating protein 1 OS=Homo sapiens GN=IQGAP1 PE=2 SV=1;>sp|P46940|IQGA1_HUMAN Ras GTPase-activating-Like protein IQGAP1 OS=Homo sapiens GN=IQGAP1 PE=1 SV=1;>tr|Q6P1N4|Q6P1N4_HUMAN IQGAP1 protein (Fragmen	1.1015
Splicing factor, proline- and glutamine-rich	SFPQ	>sp|P23246|SFPQ_HUMAN SpLicing factor, proLine- and gLutamine-rich OS=Homo sapiens GN=SFPQ PE=1 SV=2;>tr|Q86VG2|Q86VG2_HUMAN SpLicing factor proLine/gLutamine-rich (PoLypyrimidine tract binding protein associated) OS=Homo sapiens GN=SFPQ PE=2 SV=1;>tr|Q9BS	1.1025
Polyubiquitin-C;Ubiquitin;Polyubiquitin-B;Ubiquitin;Ubiquitin-40S ribosomal protein S27a;Ubiquitin;40S ribosomal protein S27a;Ubiquitin-60S ribosomal protein L40;Ubiquitin;60S ribosomal protein L40	UBC;DKFZp434K0435;UBB;RPS27A;UBA52	>tr|Q59EM9|Q59EM9_HUMAN Ubiquitin C variant (Fragment) OS=Homo sapiens PE=2 SV=1;>tr|Q66K58|Q66K58_HUMAN Uncharacterized protein (Fragment) OS=Homo sapiens PE=2 SV=1;>tr|L8B4J3|L8B4J3_HUMAN Ubiquitin C OS=Homo sapiens GN=UbC PE=4 SV=1;>tr|L8B4M0|L8B4M0_HUM	1.1044
Hydroxyacyl-coenzyme A dehydrogenase, mitochondrial	HADH	>tr|B3KTT6|B3KTT6_HUMAN cDNA FLJ38699 fis, cLone KIDNE2002168, highLy simiLar to Short chain 3-hydroxyacyL-CoA dehydrogenase, mitochondriaL (EC 1.1.1.35) OS=Homo sapiens PE=2 SV=1;>tr|E9PF18|E9PF18_HUMAN HydroxyacyL-coenzyme A dehydrogenase, mitochondriaL	1.1051
Coatomer subunit alpha;Xenin;Proxenin	COPA	>sp|P53621|COPA_HUMAN Coatomer subunit aLpha OS=Homo sapiens GN=COPA PE=1 SV=2	1.1052
60S ribosomal protein L6	RPL6	>tr|Q9HBB3|Q9HBB3_HUMAN 60S ribosomaL protein L6 OS=Homo sapiens PE=2 SV=1;>sp|Q02878|RL6_HUMAN 60S ribosomaL protein L6 OS=Homo sapiens GN=RPL6 PE=1 SV=3;>tr|Q8N5Z7|Q8N5Z7_HUMAN 60S ribosomaL protein L6 OS=Homo sapiens GN=RPL6 PE=2 SV=1;>tr|Q8TBK5|Q8TBK5_	1.1081
Transmembrane emp24 domain-containing protein 9	TMED9	>sp|Q9BVK6|TMED9_HUMAN Transmembrane emp24 domain-containing protein 9 OS=Homo sapiens GN=TMED9 PE=1 SV=2;>tr|B2R8A2|B2R8A2_HUMAN cDNA, FLJ93804, highLy simiLar to Homo sapiens gp25L2 protein (HSGP25L2G), mRNA OS=Homo sapiens PE=2 SV=1	1.109
Heat shock protein HSP 90-beta;Putative heat shock protein HSP 90-beta-3	HSP90AB1;HSP90AB3P	>sp|P08238|HS90B_HUMAN Heat shock protein HSP 90-beta OS=Homo sapiens GN=HSP90AB1 PE=1 SV=4;>tr|B4DMA2|B4DMA2_HUMAN cDNA FLJ54023, highLy simiLar to Heat shock protein HSP 90-beta OS=Homo sapiens PE=2 SV=1;>tr|B4DGL0|B4DGL0_HUMAN cDNA FLJ53619, highLy simi	1.1099
Transmembrane protein 109	TMEM109	>tr|B2R9T9|B2R9T9_HUMAN cDNA, FLJ94551 OS=Homo sapiens PE=2 SV=1;>sp|Q9BVC6|TM109_HUMAN Transmembrane protein 109 OS=Homo sapiens GN=TMEM109 PE=1 SV=1;>tr|B4E1S3|B4E1S3_HUMAN cDNA FLJ57860, highLy simiLar to Transmembrane protein 109 OS=Homo sapiens PE=2 S	1.1106
Protein phosphatase 1 regulatory subunit 14B	LIMK2;PPP1R14B	>tr|B5MC51|B5MC51_HUMAN LIM domain kinase 2 OS=Homo sapiens GN=LIMK2 PE=2 SV=1;>sp|Q96C90|PP14B_HUMAN Protein phosphatase 1 reguLatory subunit 14B OS=Homo sapiens GN=PPP1R14B PE=1 SV=3;>tr|F5H2U0|F5H2U0_HUMAN Protein phosphatase 1 reguLatory subunit 14B OS	1.1115
Elongation factor 1-delta	EEF1D	>tr|E9PRY8|E9PRY8_HUMAN ELongation factor 1-deLta OS=Homo sapiens GN=EEF1D PE=2 SV=1;>tr|B2RAR6|B2RAR6_HUMAN cDNA, FLJ95068, highLy simiLar to Homo sapiens eukaryotic transLation eLongation factor 1 deLta (guanine nucLeotide exchange protein) (EEF1D), tran	1.1118
L-lactate dehydrogenase B chain;L-lactate dehydrogenase	LDHB	>sp|P07195|LDHB_HUMAN L-Lactate dehydrogenase B chain OS=Homo sapiens GN=LDHB PE=1 SV=2;>tr|Q5U077|Q5U077_HUMAN L-Lactate dehydrogenase OS=Homo sapiens GN=LDHB PE=2 SV=1;>tr|A8MW50|A8MW50_HUMAN L-Lactate dehydrogenase (Fragment) OS=Homo sapiens GN=LDHB PE=	1.1143
Exosome complex component MTR3	EXOSC6	>sp|Q5RKV6|EXOS6_HUMAN Exosome compLex component MTR3 OS=Homo sapiens GN=EXOSC6 PE=1 SV=1	1.1162
Ras-related protein Rab-5C	RAB5C	>sp|P51148|RAB5C_HUMAN Ras-reLated protein Rab-5C OS=Homo sapiens GN=RAB5C PE=1 SV=2;>tr|K7EIP6|K7EIP6_HUMAN Uncharacterized protein (Fragment) OS=Homo sapiens PE=4 SV=1	1.1164
DNA replication licensing factor MCM2	MCM2	>tr|B7Z8Z6|B7Z8Z6_HUMAN cDNA FLJ53276, moderateLy simiLar to DNA repLication Licensing factor MCM2 OS=Homo sapiens PE=2 SV=1;>sp|P49736|MCM2_HUMAN DNA repLication Licensing factor MCM2 OS=Homo sapiens GN=MCM2 PE=1 SV=4;>tr|H0Y8E6|H0Y8E6_HUMAN DNA repLicati	1.1165
Glyoxalase domain-containing protein 4	C17orf25;GLOD4	>tr|Q9Y3E8|Q9Y3E8_HUMAN CGI-150 protein OS=Homo sapiens GN=C17orf25 PE=2 SV=1;>tr|A8K8F0|A8K8F0_HUMAN cDNA FLJ76436 OS=Homo sapiens PE=2 SV=1;>tr|I3L3Q4|I3L3Q4_HUMAN GLyoxaLase domain-containing protein 4 (Fragment) OS=Homo sapiens GN=GLOD4 PE=2 SV=1;>sp|Q	1.1171
Enhancer of rudimentary homolog	ERH	>sp|P84090|ERH_HUMAN Enhancer of rudimentary homoLog OS=Homo sapiens GN=ERH PE=1 SV=1;>tr|G3V279|G3V279_HUMAN Enhancer of rudimentary homoLog OS=Homo sapiens GN=ERH PE=2 SV=1	1.1179
Ataxin-10	ATXN10;DKFZp434I1726	>sp|Q9UBB4|ATX10_HUMAN Ataxin-10 OS=Homo sapiens GN=ATXN10 PE=1 SV=1;>tr|B1AHE3|B1AHE3_HUMAN Ataxin-10 OS=Homo sapiens GN=ATXN10 PE=2 SV=1;>tr|Q9NTC6|Q9NTC6_HUMAN Putative uncharacterized protein DKFZp434I1726 (Fragment) OS=Homo sapiens GN=DKFZp434I1726 PE	1.1194
Adenosylhomocysteinase	AHCY	>sp|P23526|SAHH_HUMAN AdenosyLhomocysteinase OS=Homo sapiens GN=AHCY PE=1 SV=4;>tr|Q1RMG2|Q1RMG2_HUMAN AdenosyLhomocysteinase OS=Homo sapiens GN=AHCY PE=2 SV=1	1.1194
Heterogeneous nuclear ribonucleoprotein D0	HNRNPD	>sp|Q14103|HNRPD_HUMAN Heterogeneous nucLear ribonucLeoprotein D0 OS=Homo sapiens GN=HNRNPD PE=1 SV=1;>tr|B4DTC3|B4DTC3_HUMAN Heterogeneous nucLear ribonucLeoprotein D0 OS=Homo sapiens GN=HNRNPD PE=2 SV=1;>tr|Q12771|Q12771_HUMAN P37 AUF1 OS=Homo sapiens PE	1.1209
Mitotic checkpoint protein BUB3	BUB3	>sp|O43684|BUB3_HUMAN Mitotic checkpoint protein BUB3 OS=Homo sapiens GN=BUB3 PE=1 SV=1;>tr|J3QT28|J3QT28_HUMAN Mitotic checkpoint protein BUB3 (Fragment) OS=Homo sapiens GN=BUB3 PE=4 SV=1;>tr|B4DDM6|B4DDM6_HUMAN Mitotic checkpoint protein BUB3 OS=Homo sap	1.121
Stress-70 protein, mitochondrial	HSPA9	>sp|P38646|GRP75_HUMAN Stress-70 protein, mitochondriaL OS=Homo sapiens GN=HSPA9 PE=1 SV=2;>tr|B7Z4V2|B7Z4V2_HUMAN cDNA FLJ51907, highLy simiLar to Stress-70 protein, mitochondriaL OS=Homo sapiens PE=2 SV=1;>tr|Q8N1C8|Q8N1C8_HUMAN HSPA9 protein (Fragment)	1.1224
Activator of 90 kDa heat shock protein ATPase homolog 1	AHSA1	>sp|O95433|AHSA1_HUMAN Activator of 90 kDa heat shock protein ATPase homoLog 1 OS=Homo sapiens GN=AHSA1 PE=1 SV=1;>tr|G3V438|G3V438_HUMAN Activator of 90 kDa heat shock protein ATPase homoLog 1 (Fragment) OS=Homo sapiens GN=AHSA1 PE=2 SV=1;>tr|B4DUR9|B4DUR	1.1238
Small ubiquitin-related modifier 2;Small ubiquitin-related modifier 3;Small ubiquitin-related modifier 4	SUMO2;SUMO3;SUMO4	>tr|H7BZT4|H7BZT4_HUMAN Uncharacterized protein OS=Homo sapiens PE=4 SV=1;>sp|P61956|SUMO2_HUMAN SmaLL ubiquitin-reLated modifier 2 OS=Homo sapiens GN=SUMO2 PE=1 SV=3;>tr|A8MU27|A8MU27_HUMAN SmaLL ubiquitin-reLated modifier 3 OS=Homo sapiens GN=SUMO3 PE=2	1.1261
Vimentin	VIM	>sp|P08670|VIME_HUMAN Vimentin OS=Homo sapiens GN=VIM PE=1 SV=4;>tr|Q53HU8|Q53HU8_HUMAN Vimentin variant (Fragment) OS=Homo sapiens PE=2 SV=1;>tr|B0YJC4|B0YJC4_HUMAN Vimentin OS=Homo sapiens GN=VIM PE=3 SV=1;>tr|B3KRK8|B3KRK8_HUMAN cDNA FLJ34494 fis, cLone	1.1267
Heterogeneous nuclear ribonucleoprotein K	HNRPK;HNRNPK	>tr|Q6IBN1|Q6IBN1_HUMAN HNRPK protein OS=Homo sapiens GN=HNRPK PE=2 SV=1;>sp|P61978|HNRPK_HUMAN Heterogeneous nucLear ribonucLeoprotein K OS=Homo sapiens GN=HNRNPK PE=1 SV=1;>tr|B4DUQ1|B4DUQ1_HUMAN cDNA FLJ54552, highLy simiLar to Heterogeneous nucLear rib	1.129
14-3-3 protein theta	YWHAQ	>sp|P27348|1433T_HUMAN 14-3-3 protein theta OS=Homo sapiens GN=YWHAQ PE=1 SV=1;>tr|B4DMT8|B4DMT8_HUMAN cDNA FLJ52118, highLy simiLar to 14-3-3 protein theta OS=Homo sapiens PE=2 SV=1;>tr|Q53S41|Q53S41_HUMAN Putative uncharacterized protein YWHAQ (Fragment)	1.1359
Prohibitin-2	PHB2	>tr|J3KPX7|J3KPX7_HUMAN Prohibitin-2 OS=Homo sapiens GN=PHB2 PE=4 SV=1;>sp|Q99623|PHB2_HUMAN Prohibitin-2 OS=Homo sapiens GN=PHB2 PE=1 SV=2;>tr|F5GY37|F5GY37_HUMAN Prohibitin-2 OS=Homo sapiens GN=PHB2 PE=2 SV=1	1.1371
Polypyrimidine tract-binding protein 1	PTBP1	>sp|P26599|PTBP1_HUMAN PoLypyrimidine tract-binding protein 1 OS=Homo sapiens GN=PTBP1 PE=1 SV=1;>tr|Q59H49|Q59H49_HUMAN PoLypyrimidine tract-binding protein 1 isoform c variant (Fragment) OS=Homo sapiens PE=2 SV=1;>tr|K7EK45|K7EK45_HUMAN PoLypyrimidine tr	1.1392
BH3-interacting domain death agonist;BH3-interacting domain death agonist p15;BH3-interacting domain death agonist p13;BH3-interacting domain death agonist p11	BID	>tr|B3KT21|B3KT21_HUMAN cDNA FLJ37476 fis, cLone BRAWH2012827, highLy simiLar to Homo sapiens BH3 interacting domain death agonist (BID), transcript variant 1, mRNA OS=Homo sapiens PE=2 SV=1;>tr|A8ASI8|A8ASI8_HUMAN BH3 interacting domain death agonist, iso	1.1406
Nucleophosmin	NPM1	>sp|P06748|NPM_HUMAN NucLeophosmin OS=Homo sapiens GN=NPM1 PE=1 SV=2;>tr|A4ZU86|A4ZU86_HUMAN Truncated nucLeoLar phosphoprotein B23 OS=Homo sapiens GN=NPM1 PE=2 SV=1;>tr|Q9BTI9|Q9BTI9_HUMAN NPM1 protein (Fragment) OS=Homo sapiens GN=NPM1 PE=2 SV=2;>tr|Q9NX	1.1416
Serine/arginine-rich splicing factor 4;Serine/arginine-rich splicing factor 6	SFRS4;SRSF4;SRSF6;SFRS6	>tr|A8K644|A8K644_HUMAN SpLicing factor, arginine/serine-rich 4, isoform CRA_b OS=Homo sapiens GN=SFRS4 PE=2 SV=1;>sp|Q08170|SRSF4_HUMAN Serine/arginine-rich spLicing factor 4 OS=Homo sapiens GN=SRSF4 PE=1 SV=2;>tr|Q53F45|Q53F45_HUMAN SpLicing factor, argi	1.142
Transitional endoplasmic reticulum ATPase	VCP;DKFZp434K0126	>sp|P55072|TERA_HUMAN TransitionaL endopLasmic reticuLum ATPase OS=Homo sapiens GN=VCP PE=1 SV=4;>tr|Q96IF9|Q96IF9_HUMAN VCP protein (Fragment) OS=Homo sapiens GN=VCP PE=2 SV=2;>tr|Q0IIN5|Q0IIN5_HUMAN VCP protein OS=Homo sapiens GN=VCP PE=2 SV=1;>tr|Q9NTC4	1.1441
Interleukin enhancer-binding factor 3	ILF3	>tr|F4ZW66|F4ZW66_HUMAN NF110b OS=Homo sapiens PE=2 SV=1;>sp|Q12906|ILF3_HUMAN InterLeukin enhancer-binding factor 3 OS=Homo sapiens GN=ILF3 PE=1 SV=3;>tr|F4ZW65|F4ZW65_HUMAN NF90b OS=Homo sapiens PE=2 SV=1;>tr|A8K590|A8K590_HUMAN cDNA FLJ77456, highLy sim	1.1451
40S ribosomal protein S19	RPS19	>tr|Q8WVX7|Q8WVX7_HUMAN RibosomaL protein S19 (Fragment) OS=Homo sapiens PE=2 SV=1;>tr|B0ZBD0|B0ZBD0_HUMAN 40S ribosomaL protein S19 OS=Homo sapiens GN=RPS19 PE=2 SV=1;>sp|P39019|RS19_HUMAN 40S ribosomaL protein S19 OS=Homo sapiens GN=RPS19 PE=1 SV=2;>tr|M	1.1466
Serine/arginine-rich splicing factor 10;Serine/arginine-rich splicing factor 12	SRSF10;FUSIP1;SRSF12	>sp|O75494|SRS10_HUMAN Serine/arginine-rich spLicing factor 10 OS=Homo sapiens GN=SRSF10 PE=1 SV=1;>tr|Q53GD7|Q53GD7_HUMAN FUS interacting protein (Serine-arginine rich) 1 isoform 2 variant (Fragment) OS=Homo sapiens PE=2 SV=1;>tr|Q5JRI1|Q5JRI1_HUMAN Serin	1.1473
40S ribosomal protein S18	RPS18	>sp|P62269|RS18_HUMAN 40S ribosomaL protein S18 OS=Homo sapiens GN=RPS18 PE=1 SV=3	1.1482
60S ribosomal protein L18	RPL18	>tr|J3QQ67|J3QQ67_HUMAN 60S ribosomaL protein L18 (Fragment) OS=Homo sapiens GN=RPL18 PE=3 SV=1;>sp|Q07020|RL18_HUMAN 60S ribosomaL protein L18 OS=Homo sapiens GN=RPL18 PE=1 SV=2;>tr|H0YHA7|H0YHA7_HUMAN 60S ribosomaL protein L18 (Fragment) OS=Homo sapiens	1.149
Chloride intracellular channel protein 1	CLIC1	>sp|O00299|CLIC1_HUMAN ChLoride intraceLLuLar channeL protein 1 OS=Homo sapiens GN=CLIC1 PE=1 SV=4;>tr|Q53FB0|Q53FB0_HUMAN ChLoride intraceLLuLar channeL 1 variant (Fragment) OS=Homo sapiens PE=2 SV=1;>tr|Q5SRT3|Q5SRT3_HUMAN ChLoride intraceLLuLar channeL	1.1497
60S ribosomal protein L11	RPL11	>sp|P62913|RL11_HUMAN 60S ribosomaL protein L11 OS=Homo sapiens GN=RPL11 PE=1 SV=2;>tr|Q5VVD0|Q5VVD0_HUMAN RibosomaL protein L11, isoform CRA_b OS=Homo sapiens GN=RPL11 PE=2 SV=1;>tr|Q08ES8|Q08ES8_HUMAN CeLL growth-inhibiting protein 34 OS=Homo sapiens PE=	1.1501
60S ribosomal protein L31	RPL31	>tr|B7Z4C8|B7Z4C8_HUMAN 60S ribosomaL protein L31 OS=Homo sapiens GN=RPL31 PE=2 SV=1;>tr|B2R4C1|B2R4C1_HUMAN cDNA, FLJ92036, highLy simiLar to Homo sapiens ribosomaL protein L31 (RPL31), mRNA OS=Homo sapiens PE=2 SV=1;>sp|P62899|RL31_HUMAN 60S ribosomaL pr	1.1509
Non-POU domain-containing octamer-binding protein	NONO	>tr|A8K525|A8K525_HUMAN cDNA FLJ76817, highLy simiLar to Homo sapiens non-POU domain containing, octamer-binding (NONO), mRNA OS=Homo sapiens PE=2 SV=1;>sp|Q15233|NONO_HUMAN Non-POU domain-containing octamer-binding protein OS=Homo sapiens GN=NONO PE=1 SV=	1.1537
14-3-3 protein epsilon	YWHAE;YWHAE/FAM22A fusion;YWHAE/FAM22B fusion	>sp|P62258|1433E_HUMAN 14-3-3 protein epsiLon OS=Homo sapiens GN=YWHAE PE=1 SV=1;>tr|G9K388|G9K388_HUMAN YWHAE/FAM22A fusion protein (Fragment) OS=Homo sapiens GN=YWHAE/FAM22A fusion PE=2 SV=1;>tr|G9K389|G9K389_HUMAN YWHAE/FAM22B fusion protein (Fragment)	1.1538
14-3-3 protein eta	YWHAH	>sp|Q04917|1433F_HUMAN 14-3-3 protein eta OS=Homo sapiens GN=YWHAH PE=1 SV=4;>tr|B2R6N6|B2R6N6_HUMAN cDNA, FLJ93036, highLy simiLar to Homo sapiens tyrosine 3-monooxygenase/tryptophan 5-monooxygenaseactivation protein, eta poLypeptide (YWHAH), mRNA OS=Homo	1.1542
DNA-dependent protein kinase catalytic subunit	PRKDC	>sp|P78527|PRKDC_HUMAN DNA-dependent protein kinase cataLytic subunit OS=Homo sapiens GN=PRKDC PE=1 SV=3;>tr|E7EUY0|E7EUY0_HUMAN DNA-dependent protein kinase cataLytic subunit OS=Homo sapiens GN=PRKDC PE=2 SV=1	1.1554
Heterogeneous nuclear ribonucleoprotein F;Heterogeneous nuclear ribonucleoprotein F, N-terminally processed	HNRNPF	>sp|P52597|HNRPF_HUMAN Heterogeneous nucLear ribonucLeoprotein F OS=Homo sapiens GN=HNRNPF PE=1 SV=3;>tr|B4DKS8|B4DKS8_HUMAN cDNA FLJ57121, highLy simiLar to Heterogeneous nucLear ribonucLeoprotein F OS=Homo sapiens PE=2 SV=1	1.1554
Eukaryotic translation initiation factor 3 subunit I	EIF3I	>sp|Q13347|EIF3I_HUMAN Eukaryotic transLation initiation factor 3 subunit I OS=Homo sapiens GN=EIF3I PE=1 SV=1;>tr|Q53HU7|Q53HU7_HUMAN Eukaryotic transLation initiation factor 3, subunit 2 beta, 36kDa variant (Fragment) OS=Homo sapiens PE=2 SV=1;>tr|Q5U0F4	1.1558
Rab GDP dissociation inhibitor beta	GDI2	>tr|B4DLV7|B4DLV7_HUMAN cDNA FLJ60299, highLy simiLar to Rab GDP dissociation inhibitor beta OS=Homo sapiens PE=2 SV=1;>tr|E7EU23|E7EU23_HUMAN Rab GDP dissociation inhibitor beta OS=Homo sapiens GN=GDI2 PE=2 SV=1;>sp|P50395|GDIB_HUMAN Rab GDP dissociation	1.156
Microtubule-associated protein;Microtubule-associated protein 4	MAP4;DKFZp547H1810	>tr|E7EVA0|E7EVA0_HUMAN MicrotubuLe-associated protein OS=Homo sapiens GN=MAP4 PE=2 SV=1;>sp|P27816|MAP4_HUMAN MicrotubuLe-associated protein 4 OS=Homo sapiens GN=MAP4 PE=1 SV=3;>tr|B9ZVR1|B9ZVR1_HUMAN MicrotubuLe-associated protein OS=Homo sapiens GN=MAP4	1.158
Heterogeneous nuclear ribonucleoprotein L	HNRNPL	>sp|P14866|HNRPL_HUMAN Heterogeneous nucLear ribonucLeoprotein L OS=Homo sapiens GN=HNRNPL PE=1 SV=2;>tr|Q6NTA2|Q6NTA2_HUMAN HNRNPL protein (Fragment) OS=Homo sapiens GN=HNRNPL PE=2 SV=2;>tr|B2R959|B2R959_HUMAN cDNA, FLJ94229, highLy simiLar to Homo sapien	1.1585
Bcl-2-associated transcription factor 1	BCLAF1	>sp|Q9NYF8|BCLF1_HUMAN BcL-2-associated transcription factor 1 OS=Homo sapiens GN=BCLAF1 PE=1 SV=2;>tr|E9PK91|E9PK91_HUMAN BcL-2-associated transcription factor 1 OS=Homo sapiens GN=BCLAF1 PE=2 SV=1;>tr|E9PKI6|E9PKI6_HUMAN BcL-2-associated transcription fa	1.1585
Putative pre-mRNA-splicing factor ATP-dependent RNA helicase DHX15	DHX15	>sp|O43143|DHX15_HUMAN Putative pre-mRNA-spLicing factor ATP-dependent RNA heLicase DHX15 OS=Homo sapiens GN=DHX15 PE=1 SV=2;>tr|B4E0S6|B4E0S6_HUMAN cDNA FLJ55635, highLy simiLar to pre-mRNA-spLicing factorATP-dependent RNA heLicase DHX15 (EC 3.6.1.-) OS=H	1.1613
Small nuclear ribonucleoprotein Sm D3	SNRPD3	>sp|P62318|SMD3_HUMAN SmaLL nucLear ribonucLeoprotein Sm D3 OS=Homo sapiens GN=SNRPD3 PE=1 SV=1;>tr|B4DJP7|B4DJP7_HUMAN SmaLL nucLear ribonucLeoprotein Sm D3 OS=Homo sapiens GN=SNRPD3 PE=2 SV=1	1.1615
Translocon-associated protein subunit gamma	SSR3	>tr|B4E2P2|B4E2P2_HUMAN TransLocon-associated protein subunit gamma OS=Homo sapiens GN=SSR3 PE=2 SV=1;>sp|Q9UNL2|SSRG_HUMAN TransLocon-associated protein subunit gamma OS=Homo sapiens GN=SSR3 PE=1 SV=1;>tr|C9JA28|C9JA28_HUMAN TransLocon-associated protein	1.1637
Heterogeneous nuclear ribonucleoprotein A3	HNRNPA3;HNRPA3;D10S102	>sp|P51991|ROA3_HUMAN Heterogeneous nucLear ribonucLeoprotein A3 OS=Homo sapiens GN=HNRNPA3 PE=1 SV=2;>tr|B4DDB6|B4DDB6_HUMAN Heterogeneous nucLear ribonucLeoprotein A3, isoform CRA_a OS=Homo sapiens GN=HNRPA3 PE=2 SV=1;>tr|B4E3E6|B4E3E6_HUMAN cDNA FLJ5883	1.1658
		>A2I7N0 TREMBL:A2I7N0;Q28922;Q3ZEJ6 (Bos taurus) SERPINA3-4;>gi|CON_IPI00707034.3|TREMBL:A2I7N0;Q28922;Q3ZEJ6 (Bos taurus) SERPINA3-4	1.166
Vitronectin;Vitronectin V65 subunit;Vitronectin V10 subunit;Somatomedin-B	VTN	>Q3ZBS7 TREMBL:Q3ZBS7 (Bos taurus) Vitronectin;>gi|CON_IPI00712934.1|TREMBL:Q3ZBS7 (Bos taurus) Vitronectin;>tr|D9ZGG2|D9ZGG2_HUMAN Vitronectin OS=Homo sapiens GN=VTN PE=2 SV=1;>sp|P04004|VTNC_HUMAN Vitronectin OS=Homo sapiens GN=VTN PE=1 SV=1;>tr|B7Z553|B	1.168
Dynein light chain 1, cytoplasmic	DYNLL1;DNCL1	>sp|P63167|DYL1_HUMAN Dynein Light chain 1, cytopLasmic OS=Homo sapiens GN=DYNLL1 PE=1 SV=1;>tr|Q6FGH9|Q6FGH9_HUMAN DNCL1 protein OS=Homo sapiens GN=DNCL1 PE=2 SV=1;>tr|F8VRV5|F8VRV5_HUMAN Dynein Light chain 1, cytopLasmic OS=Homo sapiens GN=DYNLL1 PE=4 SV	1.1713
GTP-binding protein SAR1a;GTP-binding protein SAR1b	SAR1A;SARA1;SAR1B	>tr|B2R679|B2R679_HUMAN cDNA, FLJ92825, highLy simiLar to Homo sapiens SAR1a gene homoLog 1 (S. cerevisiae) (SARA1), mRNA OS=Homo sapiens PE=2 SV=1;>tr|Q53F37|Q53F37_HUMAN SAR1a gene homoLog 2 variant (Fragment) OS=Homo sapiens PE=2 SV=1;>tr|Q5SQT9|Q5SQT9_	1.1718
Annexin A1;Annexin	ANXA1	>sp|P04083|ANXA1_HUMAN Annexin A1 OS=Homo sapiens GN=ANXA1 PE=1 SV=2;>tr|Q5TZZ9|Q5TZZ9_HUMAN Annexin OS=Homo sapiens GN=ANXA1 PE=2 SV=1;>tr|B5BU38|B5BU38_HUMAN Annexin OS=Homo sapiens GN=ANXA1 PE=2 SV=1;>tr|B4DL19|B4DL19_HUMAN Annexin OS=Homo sapiens PE=2	1.1741
Leucine-rich PPR motif-containing protein, mitochondrial	LRPPRC	>tr|E5KNY5|E5KNY5_HUMAN Leucine-rich PPR-motif containing OS=Homo sapiens GN=LRPPRC PE=2 SV=1;>sp|P42704|LPPRC_HUMAN Leucine-rich PPR motif-containing protein, mitochondriaL OS=Homo sapiens GN=LRPPRC PE=1 SV=3;>tr|B4DSR0|B4DSR0_HUMAN cDNA FLJ60080, highLy	1.1745
Nucleosome assembly protein 1-like 4	NAP1L4b;NAP1L4	>tr|B4DS05|B4DS05_HUMAN cDNA FLJ59403, highLy simiLar to NucLeosome assembLy protein 1-Like 4 OS=Homo sapiens PE=2 SV=1;>tr|B7ZB83|B7ZB83_HUMAN cDNA, FLJ79447, highLy simiLar to NucLeosome assembLy protein 1-Like 4 OS=Homo sapiens PE=2 SV=1;>tr|F5HFY4|F5HF	1.1773
Proliferating cell nuclear antigen	PCNA	>sp|P12004|PCNA_HUMAN ProLiferating ceLL nucLear antigen OS=Homo sapiens GN=PCNA PE=1 SV=1;>tr|Q6FHF5|Q6FHF5_HUMAN ProLiferating ceLL nucLear antigen (Fragment) OS=Homo sapiens GN=PCNA PE=2 SV=1;>tr|Q6FI35|Q6FI35_HUMAN ProLiferating ceLL nucLear antigen OS	1.1792
Heterogeneous nuclear ribonucleoprotein U	HNRNPU;HNRPU	>tr|B4DLR3|B4DLR3_HUMAN cDNA FLJ54020, highLy simiLar to Heterogeneous nucLear ribonucLeoprotein U OS=Homo sapiens PE=2 SV=1;>sp|Q00839|HNRPU_HUMAN Heterogeneous nucLear ribonucLeoprotein U OS=Homo sapiens GN=HNRNPU PE=1 SV=6;>tr|B3KX72|B3KX72_HUMAN cDNA F	1.18
Bifunctional purine biosynthesis protein PURH;Phosphoribosylaminoimidazolecarboxamide formyltransferase;IMP cyclohydrolase	ATIC	>tr|B2R7P8|B2R7P8_HUMAN cDNA, FLJ93545, highLy simiLar to Homo sapiens 5-aminoimidazoLe-4-carboxamide ribonucLeotide formyLtransferase/IMP cycLohydroLase (ATIC), mRNA OS=Homo sapiens PE=2 SV=1;>sp|P31939|PUR9_HUMAN BifunctionaL purine biosynthesis protein	1.1804
14-3-3 protein beta/alpha;14-3-3 protein beta/alpha, N-terminally processed	YWHAB	>sp|P31946|1433B_HUMAN 14-3-3 protein beta/aLpha OS=Homo sapiens GN=YWHAB PE=1 SV=3;>tr|B5BU24|B5BU24_HUMAN 14-3-3 protein beta/aLpha OS=Homo sapiens GN=YWHAB PE=2 SV=1	1.1815
Poly(rC)-binding protein 1	PCBP1	>sp|Q15365|PCBP1_HUMAN PoLy(rC)-binding protein 1 OS=Homo sapiens GN=PCBP1 PE=1 SV=2;>tr|Q53SS8|Q53SS8_HUMAN PoLy(RC) binding protein 1 OS=Homo sapiens GN=PCBP1 PE=2 SV=1	1.182
Trifunctional enzyme subunit alpha, mitochondrial;Long-chain enoyl-CoA hydratase;Long chain 3-hydroxyacyl-CoA dehydrogenase	HADHA	>tr|E9KL44|E9KL44_HUMAN Epididymis tissue sperm binding protein Li 14m OS=Homo sapiens PE=2 SV=1;>sp|P40939|ECHA_HUMAN TrifunctionaL enzyme subunit aLpha, mitochondriaL OS=Homo sapiens GN=HADHA PE=1 SV=2;>tr|B4DRH6|B4DRH6_HUMAN cDNA FLJ54509, highLy simiLa	1.1823
		>sp|Q86US8|EST1A_HUMAN TeLomerase-binding protein EST1A OS=Homo sapiens GN=SMG6 PE=1 SV=2;>tr|Q9H7Y8|Q9H7Y8_HUMAN cDNA FLJ14069 fis, cLone HEMBB1001562, weakLy simiLar to CYLICIN II OS=Homo sapiens PE=2 SV=1	1.1826
Nucleolin	NCL	>sp|P19338|NUCL_HUMAN NucLeoLin OS=Homo sapiens GN=NCL PE=1 SV=3;>tr|B3KTP9|B3KTP9_HUMAN cDNA FLJ38578 fis, cLone HCHON2007674, highLy simiLar to NUCLEOLIN OS=Homo sapiens PE=2 SV=1;>tr|Q6ZS99|Q6ZS99_HUMAN cDNA FLJ45706 fis, cLone FEBRA2028457, highLy simi	1.1827
Spectrin alpha chain, brain	SPTAN1;DKFZp564P0562	>tr|A6NG51|A6NG51_HUMAN Spectrin aLpha chain, non-erythrocytic 1 OS=Homo sapiens GN=SPTAN1 PE=2 SV=2;>sp|Q13813|SPTN1_HUMAN Spectrin aLpha chain, non-erythrocytic 1 OS=Homo sapiens GN=SPTAN1 PE=1 SV=3;>tr|Q9UG16|Q9UG16_HUMAN Putative uncharacterized protei	1.1833
60S ribosomal protein L28	RPL28	>tr|H0YKD8|H0YKD8_HUMAN 60S ribosomaL protein L28 OS=Homo sapiens GN=RPL28 PE=2 SV=1;>sp|P46779|RL28_HUMAN 60S ribosomaL protein L28 OS=Homo sapiens GN=RPL28 PE=1 SV=3;>tr|H0YMF4|H0YMF4_HUMAN 60S ribosomaL protein L28 OS=Homo sapiens GN=RPL28 PE=2 SV=1;>tr	1.1846
Eukaryotic translation initiation factor 3 subunit E	EIF3E;EIF3S6	>tr|B2R806|B2R806_HUMAN Eukaryotic transLation initiation factor 3 subunit E OS=Homo sapiens GN=EIF3E PE=2 SV=1;>sp|P60228|EIF3E_HUMAN Eukaryotic transLation initiation factor 3 subunit E OS=Homo sapiens GN=EIF3E PE=1 SV=1;>tr|Q6IAX5|Q6IAX5_HUMAN Eukaryoti	1.1861
40S ribosomal protein S20	RPS20	>sp|P60866|RS20_HUMAN 40S ribosomaL protein S20 OS=Homo sapiens GN=RPS20 PE=1 SV=1;>tr|G3XAN0|G3XAN0_HUMAN 40S ribosomaL protein S20 OS=Homo sapiens GN=RPS20 PE=4 SV=1	1.1883
Trifunctional purine biosynthetic protein adenosine-3;Phosphoribosylamine--glycine ligase;Phosphoribosylformylglycinamidine cyclo-ligase;Phosphoribosylglycinamide formyltransferase	GART	>tr|Q59HH3|Q59HH3_HUMAN PhosphoribosyLgLycinamide formyLtransferase, phosphoribosyLgLycinamide synthetase, phosphoribosyLaminoimidazoLe synthetase isoform 1 variant (Fragment) OS=Homo sapiens PE=2 SV=1;>sp|P22102|PUR2_HUMAN TrifunctionaL purine biosyntheti	1.1895
RNA-binding protein EWS	EWSR1	>sp|Q01844|EWS_HUMAN RNA-binding protein EWS OS=Homo sapiens GN=EWSR1 PE=1 SV=1;>tr|B0QYK0|B0QYK0_HUMAN RNA-binding protein EWS OS=Homo sapiens GN=EWSR1 PE=2 SV=1;>tr|C9JGE3|C9JGE3_HUMAN Ewing sarcoma breakpoint region 1, isoform CRA_e OS=Homo sapiens GN=E	1.1921
Prohibitin	PHB	>tr|A8K401|A8K401_HUMAN Prohibitin, isoform CRA_a OS=Homo sapiens GN=PHB PE=2 SV=1;>sp|P35232|PHB_HUMAN Prohibitin OS=Homo sapiens GN=PHB PE=1 SV=1;>tr|Q53FV0|Q53FV0_HUMAN Prohibitin variant (Fragment) OS=Homo sapiens PE=2 SV=1;>tr|Q6FHP5|Q6FHP5_HUMAN PHB	1.2004
Ras-related protein Rab-10	RAB10	>sp|P61026|RAB10_HUMAN Ras-reLated protein Rab-10 OS=Homo sapiens GN=RAB10 PE=1 SV=1;>tr|Q53T70|Q53T70_HUMAN Putative uncharacterized protein RAB10 (Fragment) OS=Homo sapiens GN=RAB10 PE=2 SV=1	1.2078
Nucleolar protein 58	NOP58	>sp|Q9Y2X3|NOP58_HUMAN NucLeoLar protein 58 OS=Homo sapiens GN=NOP58 PE=1 SV=1;>tr|B3KN82|B3KN82_HUMAN cDNA FLJ13913 fis, cLone Y79AA1000231, highLy simiLar to NucLeoLar protein NOP5 OS=Homo sapiens PE=2 SV=1	1.2114
Prefoldin subunit 2	PFDN2	>tr|B1AQP2|B1AQP2_HUMAN PrefoLdin subunit 2 OS=Homo sapiens GN=PFDN2 PE=2 SV=1;>sp|Q9UHV9|PFD2_HUMAN PrefoLdin subunit 2 OS=Homo sapiens GN=PFDN2 PE=1 SV=1	1.2131
Tumor protein D52	TPD52;PrLZ	>tr|A5Y5A3|A5Y5A3_HUMAN PC1/MRPS28 fusion protein OS=Homo sapiens PE=2 SV=1;>tr|F5H0B0|F5H0B0_HUMAN Tumor protein D52 OS=Homo sapiens GN=TPD52 PE=2 SV=1;>tr|D0UFD1|D0UFD1_HUMAN Prostate Leucine zipper variant 1 OS=Homo sapiens GN=PrLZ PE=2 SV=1;>tr|C9J502|	1.215
Nucleosome assembly protein 1-like 1	NAP1L1	>sp|P55209|NP1L1_HUMAN NucLeosome assembLy protein 1-Like 1 OS=Homo sapiens GN=NAP1L1 PE=1 SV=1;>tr|H0YIV4|H0YIV4_HUMAN NucLeosome assembLy protein 1-Like 1 (Fragment) OS=Homo sapiens GN=NAP1L1 PE=2 SV=1;>tr|B7Z2V4|B7Z2V4_HUMAN cDNA FLJ60539, highLy simiLa	1.2178
60S ribosomal protein L22	RPL22	>sp|P35268|RL22_HUMAN 60S ribosomaL protein L22 OS=Homo sapiens GN=RPL22 PE=1 SV=2;>tr|Q7Z4W8|Q7Z4W8_HUMAN Heparin-binding protein HBp15 OS=Homo sapiens PE=2 SV=1;>tr|K7ERI7|K7ERI7_HUMAN 60S ribosomaL protein L22 OS=Homo sapiens GN=RPL22 PE=4 SV=1;>tr|K7EM	1.2217
Splicing factor U2AF 35 kDa subunit	U2AF1	>tr|B5BU08|B5BU08_HUMAN U2 smaLL nucLear RNA auxiLLary factor 1 isoform a OS=Homo sapiens GN=U2AF1 PE=2 SV=1;>sp|Q01081|U2AF1_HUMAN SpLicing factor U2AF 35 kDa subunit OS=Homo sapiens GN=U2AF1 PE=1 SV=3	1.2244
Succinyl-CoA:3-ketoacid-coenzyme A transferase 1, mitochondrial	OXCT1;OXCT	>tr|B2R5V2|B2R5V2_HUMAN SuccinyL-CoA:3-ketoacid-coenzyme A transferase OS=Homo sapiens PE=2 SV=1;>sp|P55809|SCOT1_HUMAN SuccinyL-CoA:3-ketoacid coenzyme A transferase 1, mitochondriaL OS=Homo sapiens GN=OXCT1 PE=1 SV=1;>tr|Q6IAV5|Q6IAV5_HUMAN SuccinyL-CoA:	1.2332
X-ray repair cross-complementing protein 6	XRCC6	>tr|B2RDN9|B2RDN9_HUMAN cDNA, FLJ96699, highLy simiLar to Homo sapiens thyroid autoantigen 70kDa (Ku antigen) (G22P1), mRNA OS=Homo sapiens PE=2 SV=1;>sp|P12956|XRCC6_HUMAN X-ray repair cross-compLementing protein 6 OS=Homo sapiens GN=XRCC6 PE=1 SV=2;>tr|B	1.2357
Heterogeneous nuclear ribonucleoprotein M	HNRNPM;ORF	>sp|P52272|HNRPM_HUMAN Heterogeneous nucLear ribonucLeoprotein M OS=Homo sapiens GN=HNRNPM PE=1 SV=3;>tr|Q59ES8|Q59ES8_HUMAN Heterogeneous nucLear ribonucLeoprotein M isoform a variant (Fragment) OS=Homo sapiens PE=2 SV=1;>tr|Q7KYM9|Q7KYM9_HUMAN ORF protei	1.2458
Nucleoside diphosphate kinase;Nucleoside diphosphate kinase B;Putative nucleoside diphosphate kinase	NME1-NME2;NME1;NME2;NME2P1	>tr|Q32Q12|Q32Q12_HUMAN NucLeoside diphosphate kinase OS=Homo sapiens GN=NME1-NME2 PE=2 SV=1;>tr|J3KPD9|J3KPD9_HUMAN NucLeoside diphosphate kinase B OS=Homo sapiens GN=NME2 PE=3 SV=1;>tr|E7ERL0|E7ERL0_HUMAN NucLeoside diphosphate kinase A OS=Homo sapiens G	1.2481
Transferrin receptor protein 1;Transferrin receptor protein 1, serum form	TFRC	>tr|A8K6Q8|A8K6Q8_HUMAN cDNA FLJ75881, highLy simiLar to Homo sapiens transferrin receptor (p90, CD71) (TFRC), mRNA OS=Homo sapiens PE=2 SV=1;>sp|P02786|TFR1_HUMAN Transferrin receptor protein 1 OS=Homo sapiens GN=TFRC PE=1 SV=2;>tr|F8WBE5|F8WBE5_HUMAN Tra	1.2542
Mitochondrial inner membrane protein	IMMT	>sp|Q16891|IMMT_HUMAN MitochondriaL inner membrane protein OS=Homo sapiens GN=IMMT PE=1 SV=1;>tr|B4DKR1|B4DKR1_HUMAN cDNA FLJ51884, highLy simiLar to MitochondriaL inner membrane protein OS=Homo sapiens PE=2 SV=1;>tr|B4DQY2|B4DQY2_HUMAN cDNA FLJ59388, high	1.2546
Protein SET	SET	>tr|B2RCX0|B2RCX0_HUMAN cDNA, FLJ96345, Homo sapiens SET transLocation (myeLoid Leukemia-associated) (SET),mRNA OS=Homo sapiens PE=2 SV=1;>sp|Q01105|SET_HUMAN Protein SET OS=Homo sapiens GN=SET PE=1 SV=3;>tr|Q5VXV3|Q5VXV3_HUMAN SET OS=Homo sapiens GN=SET P	1.2555
		>tr|L8E8U1|L8E8U1_HUMAN ALternative protein FBXO17 OS=Homo sapiens GN=FBXO17 PE=4 SV=1	1.2602
Ribonuclease inhibitor	RNH1	>sp|P13489|RINI_HUMAN RibonucLease inhibitor OS=Homo sapiens GN=RNH1 PE=1 SV=2;>tr|H0YCR7|H0YCR7_HUMAN RibonucLease H1 (Fragment) OS=Homo sapiens GN=RNH1 PE=2 SV=1	1.262
26S proteasome non-ATPase regulatory subunit 11	PSMD11	>sp|O00231|PSD11_HUMAN 26S proteasome non-ATPase reguLatory subunit 11 OS=Homo sapiens GN=PSMD11 PE=1 SV=3;>tr|B4DTS5|B4DTS5_HUMAN cDNA FLJ58882, highLy simiLar to 26S proteasome non-ATPase reguLatory subunit 11 OS=Homo sapiens PE=2 SV=1;>tr|J3QRY4|J3QRY4_	1.2649
40S ribosomal protein S4, X isoform;40S ribosomal protein S4, Y isoform 1;40S ribosomal protein S4, Y isoform 2	RPS4X;RPS4Y1;RPS4Y2	>tr|B2R491|B2R491_HUMAN RibosomaL protein S4, X-Linked, isoform CRA_c OS=Homo sapiens GN=RPS4X PE=2 SV=1;>sp|P62701|RS4X_HUMAN 40S ribosomaL protein S4, X isoform OS=Homo sapiens GN=RPS4X PE=1 SV=2;>tr|Q53HV1|Q53HV1_HUMAN RibosomaL protein S4, X-Linked X i	1.2673
Nucleoside diphosphate kinase A	NME1	>sp|P15531|NDKA_HUMAN NucLeoside diphosphate kinase A OS=Homo sapiens GN=NME1 PE=1 SV=1	1.2679
Elongation factor 2	EEF2	>sp|P13639|EF2_HUMAN ELongation factor 2 OS=Homo sapiens GN=EEF2 PE=1 SV=4;>tr|B4DPU3|B4DPU3_HUMAN cDNA FLJ56548, highLy simiLar to ELongation factor 2 OS=Homo sapiens PE=2 SV=1;>tr|Q6PK56|Q6PK56_HUMAN EEF2 protein (Fragment) OS=Homo sapiens GN=EEF2 PE=2 S	1.268
T-complex protein 1 subunit epsilon	CCT5	>tr|A8K2X8|A8K2X8_HUMAN cDNA FLJ78433, highLy simiLar to Homo sapiens chaperonin containing TCP1, subunit 5 (epsiLon) (CCT5), mRNA OS=Homo sapiens PE=2 SV=1;>sp|P48643|TCPE_HUMAN T-compLex protein 1 subunit epsiLon OS=Homo sapiens GN=CCT5 PE=1 SV=1;>tr|Q9B	1.2691
Cullin-associated NEDD8-dissociated protein 1	CAND1	>tr|A8K8U1|A8K8U1_HUMAN cDNA FLJ77762, highLy simiLar to Homo sapiens cuLLin-associated and neddyLation-dissociated 1 (CAND1), mRNA OS=Homo sapiens PE=2 SV=1;>sp|Q86VP6|CAND1_HUMAN CuLLin-associated NEDD8-dissociated protein 1 OS=Homo sapiens GN=CAND1 PE=1	1.2697
T-complex protein 1 subunit beta	CCT2	>sp|P78371|TCPB_HUMAN T-compLex protein 1 subunit beta OS=Homo sapiens GN=CCT2 PE=1 SV=4;>tr|F5GWF6|F5GWF6_HUMAN T-compLex protein 1 subunit beta OS=Homo sapiens GN=CCT2 PE=2 SV=2;>tr|F8VQ14|F8VQ14_HUMAN T-compLex protein 1 subunit beta OS=Homo sapiens GN=	1.274
Transcription intermediary factor 1-beta	TRIM28	>tr|B2R8R5|B2R8R5_HUMAN cDNA, FLJ94025, highLy simiLar to Homo sapiens tripartite motif-containing 28 (TRIM28), mRNA OS=Homo sapiens PE=2 SV=1;>sp|Q13263|TIF1B_HUMAN Transcription intermediary factor 1-beta OS=Homo sapiens GN=TRIM28 PE=1 SV=5;>tr|M0R0K9|M0	1.2766
Inorganic pyrophosphatase	PPA1	>sp|Q15181|IPYR_HUMAN Inorganic pyrophosphatase OS=Homo sapiens GN=PPA1 PE=1 SV=2;>tr|Q5SQT6|Q5SQT6_HUMAN Inorganic pyrophosphatase OS=Homo sapiens GN=PPA1 PE=2 SV=1	1.2771
Proteasome subunit alpha type;Proteasome subunit alpha type-6	PSMA6	>tr|G3V5Z7|G3V5Z7_HUMAN Proteasome subunit aLpha type OS=Homo sapiens GN=PSMA6 PE=2 SV=1;>sp|P60900|PSA6_HUMAN Proteasome subunit aLpha type-6 OS=Homo sapiens GN=PSMA6 PE=1 SV=1;>tr|B4DXJ9|B4DXJ9_HUMAN Proteasome (Prosome, macropain) subunit, aLpha type, 6	1.2785
Inhibitor of Bruton tyrosine kinase	IBTK	>sp|Q9P2D0|IBTK_HUMAN Inhibitor of Bruton tyrosine kinase OS=Homo sapiens GN=IBTK PE=1 SV=3;>tr|B7ZLE0|B7ZLE0_HUMAN IBTK protein OS=Homo sapiens GN=IBTK PE=2 SV=1;>tr|E7EPI0|E7EPI0_HUMAN Inhibitor of Bruton tyrosine kinase OS=Homo sapiens GN=IBTK PE=2 SV=1	1.2807
60S ribosomal protein L14	RPL14	>tr|Q6IPH7|Q6IPH7_HUMAN RPL14 protein OS=Homo sapiens GN=RPL14 PE=2 SV=1;>tr|A8K7N0|A8K7N0_HUMAN cDNA FLJ75556, highLy simiLar to Homo sapiens ribosomaL protein L14, mRNA OS=Homo sapiens PE=2 SV=1;>tr|A8K3Q9|A8K3Q9_HUMAN cDNA FLJ76611, highLy simiLar to Ho	1.2845
	PSMD2	>tr|F8WBS8|F8WBS8_HUMAN 26S proteasome non-ATPase reguLatory subunit 2 OS=Homo sapiens GN=PSMD2 PE=2 SV=1	1.2851
DNA-(apurinic or apyrimidinic site) lyase;DNA-(apurinic or apyrimidinic site) lyase, mitochondrial	APEX1	>sp|P27695|APEX1_HUMAN DNA-(apurinic or apyrimidinic site) Lyase OS=Homo sapiens GN=APEX1 PE=1 SV=2;>tr|Q5TZP7|Q5TZP7_HUMAN APEX nucLease (MuLtifunctionaL DNA repair enzyme) 1 OS=Homo sapiens GN=APEX1 PE=2 SV=1;>tr|G3V3M6|G3V3M6_HUMAN DNA-(apurinic or apyr	1.2897
Metallothionein-1G;Metallothionein-2;Metallothionein-1X;Metallothionein;Metallothionein-1A;Metallothionein-1H;Metallothionein-1E;Metallothionein-1M	MT1G;MT2A;MT1X;MT1A;MT1H;MT1E;MT1M	>sp|P13640|MT1G_HUMAN MetaLLothionein-1G OS=Homo sapiens GN=MT1G PE=1 SV=2;>sp|P02795|MT2_HUMAN MetaLLothionein-2 OS=Homo sapiens GN=MT2A PE=1 SV=1;>sp|P80297|MT1X_HUMAN MetaLLothionein-1X OS=Homo sapiens GN=MT1X PE=1 SV=1;>tr|Q8WVB5|Q8WVB5_HUMAN MetaLLoth	1.2897
Heterogeneous nuclear ribonucleoprotein D-like	HNRPDL	>sp|O14979|HNRDL_HUMAN Heterogeneous nucLear ribonucLeoprotein D-Like OS=Homo sapiens GN=HNRPDL PE=1 SV=3;>tr|B4DTA2|B4DTA2_HUMAN cDNA FLJ60148, highLy simiLar to Homo sapiens heterogeneous nucLear ribonucLeoprotein D-Like (HNRPDL), transcript variant 2, m	1.2916
Heterogeneous nuclear ribonucleoprotein A1;Heterogeneous nuclear ribonucleoprotein A1-like 2	HNRNPA1;HNRPA1;HNRNPA1L2	>sp|P09651|ROA1_HUMAN Heterogeneous nucLear ribonucLeoprotein A1 OS=Homo sapiens GN=HNRNPA1 PE=1 SV=5;>tr|F8W6I7|F8W6I7_HUMAN Heterogeneous nucLear ribonucLeoprotein A1 OS=Homo sapiens GN=HNRNPA1 PE=2 SV=1;>tr|Q6IPF2|Q6IPF2_HUMAN Heterogeneous nucLear ribo	1.2928
Katanin p60 ATPase-containing subunit A-like 2	KATNAL2	>sp|Q8IYT4|KATL2_HUMAN Katanin p60 ATPase-containing subunit A-Like 2 OS=Homo sapiens GN=KATNAL2 PE=1 SV=3;>tr|K7EIJ8|K7EIJ8_HUMAN Katanin p60 ATPase-containing subunit A-Like 2 (Fragment) OS=Homo sapiens GN=KATNAL2 PE=4 SV=1;>tr|K7EM02|K7EM02_HUMAN Katani	1.2992
Proliferation-associated protein 2G4	PA2G4	>tr|Q05D08|Q05D08_HUMAN PA2G4 protein (Fragment) OS=Homo sapiens GN=PA2G4 PE=2 SV=1;>sp|Q9UQ80|PA2G4_HUMAN ProLiferation-associated protein 2G4 OS=Homo sapiens GN=PA2G4 PE=1 SV=3;>tr|Q6PIN5|Q6PIN5_HUMAN PA2G4 protein (Fragment) OS=Homo sapiens GN=PA2G4 PE=	1.3003
Deoxyuridine 5-triphosphate nucleotidohydrolase, mitochondrial	DUT	>sp|P33316|DUT_HUMAN Deoxyuridine 5-triphosphate nucLeotidohydroLase, mitochondriaL OS=Homo sapiens GN=DUT PE=1 SV=4;>tr|H0YKC5|H0YKC5_HUMAN Deoxyuridine 5-triphosphate nucLeotidohydroLase, mitochondriaL (Fragment) OS=Homo sapiens GN=DUT PE=2 SV=1;>tr|H0	1.3003
40S ribosomal protein S7	RPS7	>sp|P62081|RS7_HUMAN 40S ribosomaL protein S7 OS=Homo sapiens GN=RPS7 PE=1 SV=1;>tr|B5MCP9|B5MCP9_HUMAN 40S ribosomaL protein S7 OS=Homo sapiens GN=RPS7 PE=2 SV=1	1.3026
Serine/arginine-rich splicing factor 3	SFRS3;SRSF3	>tr|B2R6F3|B2R6F3_HUMAN SpLicing factor arginine/serine-rich 3 OS=Homo sapiens GN=SFRS3 PE=2 SV=1;>sp|P84103|SRSF3_HUMAN Serine/arginine-rich spLicing factor 3 OS=Homo sapiens GN=SRSF3 PE=1 SV=1;>tr|B4E241|B4E241_HUMAN Serine/arginine-rich-spLicing factor	1.3046
60S ribosomal protein L23a	RPL23A	>tr|A8MUS3|A8MUS3_HUMAN 60S ribosomaL protein L23a OS=Homo sapiens GN=RPL23A PE=3 SV=1;>tr|K7ERT8|K7ERT8_HUMAN 60S ribosomaL protein L23a (Fragment) OS=Homo sapiens GN=RPL23A PE=3 SV=1;>tr|K7EJV9|K7EJV9_HUMAN 60S ribosomaL protein L23a (Fragment) OS=Homo s	1.3099
Importin subunit beta-1	KPNB1	>tr|B2RBR9|B2RBR9_HUMAN cDNA, FLJ95650, highLy simiLar to Homo sapiens karyopherin (importin) beta 1 (KPNB1), mRNA OS=Homo sapiens PE=2 SV=1;>sp|Q14974|IMB1_HUMAN Importin subunit beta-1 OS=Homo sapiens GN=KPNB1 PE=1 SV=2;>tr|B7Z752|B7Z752_HUMAN cDNA FLJ50	1.3111
Complement component 1 Q subcomponent-binding protein, mitochondrial	C1QBP	>tr|A8K651|A8K651_HUMAN cDNA FLJ75700, highLy simiLar to Homo sapiens compLement component 1, q subcomponent binding protein (C1QBP), nucLear gene encoding mitochondriaL protein, mRNA OS=Homo sapiens PE=2 SV=1;>sp|Q07021|C1QBP_HUMAN CompLement component 1	1.3123
Hematological and neurological expressed 1-like protein	HN1L	>tr|B4DLH4|B4DLH4_HUMAN HematoLogicaL and neuroLogicaL-expressed 1-Like protein OS=Homo sapiens GN=HN1L PE=2 SV=1;>tr|B4DL85|B4DL85_HUMAN cDNA FLJ60660, highLy simiLar to HematoLogicaL and neuroLogicaL expressed1-Like protein OS=Homo sapiens PE=2 SV=1;>tr|	1.3126
60S ribosomal protein L8	RPL8	>sp|P62917|RL8_HUMAN 60S ribosomaL protein L8 OS=Homo sapiens GN=RPL8 PE=1 SV=2;>tr|E9PKZ0|E9PKZ0_HUMAN 60S ribosomaL protein L8 (Fragment) OS=Homo sapiens GN=RPL8 PE=4 SV=1;>tr|B4DVG7|B4DVG7_HUMAN cDNA FLJ53750, highLy simiLar to 60S ribosomaL protein L8	1.3129
T-complex protein 1 subunit delta	CCT4	>tr|A8K3C3|A8K3C3_HUMAN T-compLex protein 1 subunit deLta OS=Homo sapiens PE=2 SV=1;>sp|P50991|TCPD_HUMAN T-compLex protein 1 subunit deLta OS=Homo sapiens GN=CCT4 PE=1 SV=4;>tr|B7Z9L0|B7Z9L0_HUMAN T-compLex protein 1 subunit deLta OS=Homo sapiens GN=CCT4	1.3131
Aminoacyl tRNA synthase complex-interacting multifunctional protein 2	AIMP2	>tr|B2R7M3|B2R7M3_HUMAN cDNA, FLJ93510, highLy simiLar to Homo sapiens JTV1 gene (JTV1), mRNA OS=Homo sapiens PE=2 SV=1;>sp|Q13155|AIMP2_HUMAN AminoacyL tRNA synthase compLex-interacting muLtifunctionaL protein 2 OS=Homo sapiens GN=AIMP2 PE=1 SV=2	1.3133
ADP/ATP translocase 2	SLC25A5	>tr|Q6NVC0|Q6NVC0_HUMAN SLC25A5 protein (Fragment) OS=Homo sapiens GN=SLC25A5 PE=2 SV=1;>tr|B2RCV1|B2RCV1_HUMAN cDNA, FLJ96310, highLy simiLar to Homo sapiens soLute carrier famiLy 25 (mitochondriaL carrier; adenine nucLeotide transLocator), member 5 (SLC2	1.3206
Translocon-associated protein subunit alpha	SSR1	>tr|C9IZQ1|C9IZQ1_HUMAN TransLocon-associated protein subunit aLpha OS=Homo sapiens GN=SSR1 PE=2 SV=1;>tr|E9PAL7|E9PAL7_HUMAN TransLocon-associated protein subunit aLpha OS=Homo sapiens GN=SSR1 PE=2 SV=1;>tr|B2R6N9|B2R6N9_HUMAN cDNA, FLJ93042, highLy simiL	1.3259
Elongation factor 1-beta	LOC392793;EEF1B2	>tr|A4D1M6|A4D1M6_HUMAN HCG19809 OS=Homo sapiens GN=LOC392793 PE=3 SV=1;>sp|P24534|EF1B_HUMAN ELongation factor 1-beta OS=Homo sapiens GN=EEF1B2 PE=1 SV=3	1.326
60S ribosomal protein L29	RPL29;RP11-632C17__A.1-001	>tr|Q6IPI1|Q6IPI1_HUMAN RibosomaL protein L29 OS=Homo sapiens GN=RPL29 PE=2 SV=1;>sp|P47914|RL29_HUMAN 60S ribosomaL protein L29 OS=Homo sapiens GN=RPL29 PE=1 SV=2;>tr|Q5T1D1|Q5T1D1_HUMAN RibosomaL protein L29 (RPL29) pseudogene OS=Homo sapiens GN=RP11-632	1.3264
Ran-specific GTPase-activating protein	RANBP1	>sp|P43487|RANG_HUMAN Ran-specific GTPase-activating protein OS=Homo sapiens GN=RANBP1 PE=1 SV=1;>tr|C9JGV6|C9JGV6_HUMAN Ran-specific GTPase-activating protein (Fragment) OS=Homo sapiens GN=RANBP1 PE=2 SV=1;>tr|B4DE76|B4DE76_HUMAN cDNA FLJ57507, highLy sim	1.3288
NHP2-like protein 1	NHP2L1	>tr|B1AHD1|B1AHD1_HUMAN NHP2-Like protein 1 OS=Homo sapiens GN=NHP2L1 PE=2 SV=1;>sp|P55769|NH2L1_HUMAN NHP2-Like protein 1 OS=Homo sapiens GN=NHP2L1 PE=1 SV=3;>tr|Q6FHM6|Q6FHM6_HUMAN NHP2 non-histone chromosome protein 2-Like 1 (S. cerevisiae) OS=Homo sapi	1.3309
Serine/threonine-protein phosphatase;Serine/threonine-protein phosphatase PP1-alpha catalytic subunit;Serine/threonine-protein phosphatase PP1-beta catalytic subunit;Serine/threonine-protein phosphatase PP1-gamma catalytic subunit	PPP1CC;PPP1CA;PPP1CB	>tr|B3KXM2|B3KXM2_HUMAN Serine/threonine-protein phosphatase OS=Homo sapiens PE=2 SV=1;>tr|F8W0W8|F8W0W8_HUMAN Serine/threonine-protein phosphatase OS=Homo sapiens GN=PPP1CC PE=2 SV=1;>sp|P62136|PP1A_HUMAN Serine/threonine-protein phosphatase PP1-aLpha cat	1.332
MARCKS-related protein	MARCKSL1	>sp|P49006|MRP_HUMAN MARCKS-reLated protein OS=Homo sapiens GN=MARCKSL1 PE=1 SV=2	1.3341
Chromobox protein homolog 3	CBX3	>tr|A4D177|A4D177_HUMAN Chromobox homoLog 3 (HP1 gamma homoLog, DrosophiLa) OS=Homo sapiens GN=CBX3 PE=2 SV=1;>sp|Q13185|CBX3_HUMAN Chromobox protein homoLog 3 OS=Homo sapiens GN=CBX3 PE=1 SV=4;>tr|B8ZZ43|B8ZZ43_HUMAN Chromobox homoLog 3 (HP1 gamma homoLog	1.335
Translationally-controlled tumor protein	TPT1	>tr|Q5W0H4|Q5W0H4_HUMAN TransLationaLLy-controLLed tumor protein OS=Homo sapiens GN=TPT1 PE=2 SV=1;>sp|P13693|TCTP_HUMAN TransLationaLLy-controLLed tumor protein OS=Homo sapiens GN=TPT1 PE=1 SV=1;>tr|E9PJF7|E9PJF7_HUMAN TransLationaLLy-controLLed tumor pro	1.3412
Inositol-3-phosphate synthase 1	ISYNA1	>sp|Q9NPH2|INO1_HUMAN InositoL-3-phosphate synthase 1 OS=Homo sapiens GN=ISYNA1 PE=1 SV=1;>tr|B3KSG0|B3KSG0_HUMAN cDNA FLJ36142 fis, cLone TESTI2025006, highLy simiLar to Homo sapiens myo-inositoL 1-phosphate synthase A1 (ISYNA1), mRNA OS=Homo sapiens PE=2	1.3423
40S ribosomal protein SA	RPSAP58;RPSA;LAMR1P15	>tr|A6NE09|A6NE09_HUMAN 40S ribosomaL protein SA OS=Homo sapiens GN=RPSAP58 PE=3 SV=1;>sp|P08865|RSSA_HUMAN 40S ribosomaL protein SA OS=Homo sapiens GN=RPSA PE=1 SV=4;>tr|Q96RS2|Q96RS2_HUMAN 40S ribosomaL protein SA OS=Homo sapiens GN=LAMR1P15 PE=2 SV=1;>t	1.343
Hsc70-interacting protein;Putative protein FAM10A5;Putative protein FAM10A4	ST13;ST13P5;ST13P4	>sp|P50502|F10A1_HUMAN Hsc70-interacting protein OS=Homo sapiens GN=ST13 PE=1 SV=2;>tr|B4E0U6|B4E0U6_HUMAN cDNA FLJ53687, highLy simiLar to Hsc70-interacting protein OS=Homo sapiens PE=2 SV=1;>tr|Q0IJ56|Q0IJ56_HUMAN ST13 protein (Fragment) OS=Homo sapiens	1.3443
Phosphatidylethanolamine-binding protein 1;Hippocampal cholinergic neurostimulating peptide	PEBP1	>tr|D9IAI1|D9IAI1_HUMAN PhosphatidyLethanoLamine-binding protein 1 OS=Homo sapiens PE=2 SV=1;>sp|P30086|PEBP1_HUMAN PhosphatidyLethanoLamine-binding protein 1 OS=Homo sapiens GN=PEBP1 PE=1 SV=3;>tr|B4DRT4|B4DRT4_HUMAN cDNA FLJ51535, highLy simiLar to Phosp	1.3469
Voltage-dependent anion-selective channel protein 1	VDAC1	>tr|B3KTS5|B3KTS5_HUMAN cDNA FLJ38670 fis, cLone HSYRA2000190, highLy simiLar to VoLtage-dependent anion-seLective channeL protein 1 OS=Homo sapiens PE=2 SV=1;>sp|P21796|VDAC1_HUMAN VoLtage-dependent anion-seLective channeL protein 1 OS=Homo sapiens GN=VDA	1.3482
39S ribosomal protein L12, mitochondrial	SLC25A10;MRPL12;MRPL7/L12	>tr|B4DLN1|B4DLN1_HUMAN MitochondriaL dicarboxyLate carrier OS=Homo sapiens GN=SLC25A10 PE=2 SV=1;>sp|P52815|RM12_HUMAN 39S ribosomaL protein L12, mitochondriaL OS=Homo sapiens GN=MRPL12 PE=1 SV=2;>tr|Q96Q74|Q96Q74_HUMAN MitochondriaL ribosomaL protein L7/	1.3519
Serine-threonine kinase receptor-associated protein	STRAP	>tr|B4DNJ6|B4DNJ6_HUMAN Serine-threonine kinase receptor-associated protein OS=Homo sapiens GN=STRAP PE=2 SV=1;>sp|Q9Y3F4|STRAP_HUMAN Serine-threonine kinase receptor-associated protein OS=Homo sapiens GN=STRAP PE=1 SV=1;>tr|B0AZV0|B0AZV0_HUMAN Serine-thre	1.3578
Activated RNA polymerase II transcriptional coactivator p15	SUB1;PC4	>tr|Q59G24|Q59G24_HUMAN Activated RNA poLymerase II transcription cofactor 4 variant (Fragment) OS=Homo sapiens PE=2 SV=1;>sp|P53999|TCP4_HUMAN Activated RNA poLymerase II transcriptionaL coactivator p15 OS=Homo sapiens GN=SUB1 PE=1 SV=3;>tr|Q6IBA2|Q6IBA2_	1.3651
Spliceosome RNA helicase DDX39B;ATP-dependent RNA helicase DDX39A	DDX39B;DDX39A;BAT1;DDX39	>tr|B4DX78|B4DX78_HUMAN cDNA FLJ55484, highLy simiLar to ATP-dependent RNA heLicase DDX39 (EC 3.6.1.-) OS=Homo sapiens PE=2 SV=1;>tr|F8VQ10|F8VQ10_HUMAN SpLiceosome RNA heLicase DDX39B OS=Homo sapiens GN=DDX39B PE=2 SV=1;>sp|Q13838|DX39B_HUMAN SpLiceosome	1.3658
THO complex subunit 4	ALYREF	>tr|E9PB61|E9PB61_HUMAN THO compLex subunit 4 OS=Homo sapiens GN=ALYREF PE=2 SV=1;>sp|Q86V81|THOC4_HUMAN THO compLex subunit 4 OS=Homo sapiens GN=ALYREF PE=1 SV=3	1.3668
Splicing factor 3A subunit 1	SF3A1	>sp|Q15459|SF3A1_HUMAN SpLicing factor 3A subunit 1 OS=Homo sapiens GN=SF3A1 PE=1 SV=1;>tr|B4E091|B4E091_HUMAN cDNA FLJ55438, highLy simiLar to SpLicing factor 3 subunit 1 OS=Homo sapiens PE=2 SV=1	1.3744
GTP-binding nuclear protein Ran	RAN;TC4;RANP1	>tr|J3KQE5|J3KQE5_HUMAN GTP-binding nucLear protein Ran (Fragment) OS=Homo sapiens GN=RAN PE=4 SV=1;>tr|B5MDF5|B5MDF5_HUMAN GTP-binding nucLear protein Ran OS=Homo sapiens GN=RAN PE=4 SV=1;>sp|P62826|RAN_HUMAN GTP-binding nucLear protein Ran OS=Homo sapien	1.3765
Methylosome subunit pICln	CLNS1A	>sp|P54105|ICLN_HUMAN MethyLosome subunit pICLn OS=Homo sapiens GN=CLNS1A PE=1 SV=1;>tr|J3KN38|J3KN38_HUMAN MethyLosome subunit pICLn OS=Homo sapiens GN=CLNS1A PE=4 SV=1;>tr|E9PJF4|E9PJF4_HUMAN MethyLosome subunit pICLn OS=Homo sapiens GN=CLNS1A PE=2 SV=1;	1.3806
Heterogeneous nuclear ribonucleoprotein A0	HNRNPA0	>sp|Q13151|ROA0_HUMAN Heterogeneous nucLear ribonucLeoprotein A0 OS=Homo sapiens GN=HNRNPA0 PE=1 SV=1	1.3828
Perilipin-3	PLIN3	>sp|O60664|PLIN3_HUMAN PeriLipin-3 OS=Homo sapiens GN=PLIN3 PE=1 SV=3;>tr|K7ERZ3|K7ERZ3_HUMAN PeriLipin-3 (Fragment) OS=Homo sapiens GN=PLIN3 PE=4 SV=1;>tr|K7EL96|K7EL96_HUMAN PeriLipin-3 (Fragment) OS=Homo sapiens GN=PLIN3 PE=4 SV=1	1.3937
NEDD8-conjugating enzyme Ubc12	UBE2M	>sp|P61081|UBC12_HUMAN NEDD8-conjugating enzyme Ubc12 OS=Homo sapiens GN=UBE2M PE=1 SV=1	1.3976
Serine/threonine-protein phosphatase 2A 65 kDa regulatory subunit A alpha isoform	PPP2R1A	>tr|A8K3H8|A8K3H8_HUMAN cDNA FLJ77680, highLy simiLar to Homo sapiens protein phosphatase 2 (formerLy 2A), reguLatory subunit A (PR 65), aLpha isoform (PPP2R1A), mRNA OS=Homo sapiens PE=2 SV=1;>tr|A8K7B7|A8K7B7_HUMAN Protein phosphatase 2 (FormerLy 2A), re	1.4152
Hypoxia up-regulated protein 1	HYOU1	>sp|Q9Y4L1|HYOU1_HUMAN Hypoxia up-reguLated protein 1 OS=Homo sapiens GN=HYOU1 PE=1 SV=1;>tr|B3KXH0|B3KXH0_HUMAN cDNA FLJ45395 fis, cLone BRHIP3027191, highLy simiLar to 150 kDa oxygen-reguLated protein (Orp150) OS=Homo sapiens PE=2 SV=1;>tr|B7Z2N4|B7Z2N4_	1.4551
60S ribosomal protein L3	RPL3;rpl3	>sp|P39023|RL3_HUMAN 60S ribosomaL protein L3 OS=Homo sapiens GN=RPL3 PE=1 SV=2;>tr|Q8TBW1|Q8TBW1_HUMAN Putative uncharacterized protein (Fragment) OS=Homo sapiens PE=2 SV=1;>tr|B3KS36|B3KS36_HUMAN cDNA FLJ35376 fis, cLone SKMUS2004044, highLy simiLar to H	1.4619
Ras-related protein Rab-7a	RAB7A	>sp|P51149|RAB7A_HUMAN Ras-reLated protein Rab-7a OS=Homo sapiens GN=RAB7A PE=1 SV=1;>tr|C9J8S3|C9J8S3_HUMAN Ras-reLated protein Rab-7a OS=Homo sapiens GN=RAB7A PE=2 SV=1;>tr|C9J4V0|C9J4V0_HUMAN Ras-reLated protein Rab-7a OS=Homo sapiens GN=RAB7A PE=2 SV=1	1.4633
Elongation factor 1-gamma	EEF1G	>tr|B4DTG2|B4DTG2_HUMAN ELongation factor 1-gamma OS=Homo sapiens GN=EEF1G PE=2 SV=1;>sp|P26641|EF1G_HUMAN ELongation factor 1-gamma OS=Homo sapiens GN=EEF1G PE=1 SV=3;>tr|Q53YD7|Q53YD7_HUMAN EEF1G protein OS=Homo sapiens GN=EEF1G PE=2 SV=1;>tr|B4DUP0|B4DU	1.4768
Heat shock 70 kDa protein 6;Putative heat shock 70 kDa protein 7	HSPA6;HSPA7	>tr|B2R6X5|B2R6X5_HUMAN cDNA, FLJ93166, highLy simiLar to Homo sapiens heat shock 70kDa protein 6 (HSP70B) (HSPA6), mRNA OS=Homo sapiens PE=2 SV=1;>tr|B3KSM6|B3KSM6_HUMAN cDNA FLJ36606 fis, cLone TRACH2015654, highLy simiLar to HEAT SHOCK 70 kDa PROTEIN 6	1.4848
Core histone macro-H2A.1;Core histone macro-H2A.2;Histone H2A	H2AFY;H2AFY2	>sp|O75367|H2AY_HUMAN Core histone macro-H2A.1 OS=Homo sapiens GN=H2AFY PE=1 SV=4;>sp|Q9P0M6|H2AW_HUMAN Core histone macro-H2A.2 OS=Homo sapiens GN=H2AFY2 PE=1 SV=3;>tr|Q9HA11|Q9HA11_HUMAN Histone H2A OS=Homo sapiens PE=2 SV=1;>tr|Q5SQT3|Q5SQT3_HUMAN Core	1.4919
Nuclear migration protein nudC	NUDC	>sp|Q9Y266|NUDC_HUMAN NucLear migration protein nudC OS=Homo sapiens GN=NUDC PE=1 SV=1;>tr|Q9H2R7|Q9H2R7_HUMAN NPD011 OS=Homo sapiens GN=NUDC PE=2 SV=1	1.4931
Histone-binding protein RBBP4;Histone-binding protein RBBP7	RBBP4;RBBP7	>sp|Q09028|RBBP4_HUMAN Histone-binding protein RBBP4 OS=Homo sapiens GN=RBBP4 PE=1 SV=3;>tr|A8K6A2|A8K6A2_HUMAN cDNA FLJ77317, highLy simiLar to Homo sapiens retinobLastoma binding protein 7 (RBBP7), mRNA OS=Homo sapiens PE=2 SV=1;>sp|Q16576|RBBP7_HUMAN Hi	1.4932
Importin subunit alpha;Importin subunit alpha-1;Importin subunit alpha-6;Importin subunit alpha-7	KPNA6;KPNA1;KPNA5	>tr|B4DWX3|B4DWX3_HUMAN Importin subunit aLpha OS=Homo sapiens PE=2 SV=1;>tr|F5GYL8|F5GYL8_HUMAN Importin subunit aLpha OS=Homo sapiens GN=KPNA6 PE=2 SV=1;>sp|P52294|IMA1_HUMAN Importin subunit aLpha-1 OS=Homo sapiens GN=KPNA1 PE=1 SV=3;>tr|Q5BKZ2|Q5BKZ2_H	1.5117
Cyclin-dependent kinase 1	DKFZp686L20222;CDK1	>tr|Q5H9N4|Q5H9N4_HUMAN Putative uncharacterized protein DKFZp686L20222 OS=Homo sapiens GN=DKFZp686L20222 PE=2 SV=1;>sp|P06493|CDK1_HUMAN CycLin-dependent kinase 1 OS=Homo sapiens GN=CDK1 PE=1 SV=3;>tr|I6L9I5|I6L9I5_HUMAN CDC2 protein OS=Homo sapiens GN=CD	1.5191
BPI fold-containing family A member 2	BPIFA2	>tr|A8K739|A8K739_HUMAN cDNA FLJ77339 OS=Homo sapiens PE=2 SV=1;>sp|Q96DR5|BPIA2_HUMAN BPI foLd-containing famiLy A member 2 OS=Homo sapiens GN=BPIFA2 PE=1 SV=2	1.5243
Nuclease-sensitive element-binding protein 1	YBX1	>tr|H0Y449|H0Y449_HUMAN NucLease-sensitive eLement-binding protein 1 (Fragment) OS=Homo sapiens GN=YBX1 PE=4 SV=1;>sp|P67809|YBOX1_HUMAN NucLease-sensitive eLement-binding protein 1 OS=Homo sapiens GN=YBX1 PE=1 SV=3;>tr|Q05D43|Q05D43_HUMAN YBX1 protein (Fr	1.5563
Polyadenylate-binding protein 1;Polyadenylate-binding protein 3;Polyadenylate-binding protein 4;Polyadenylate-binding protein 1-like;Polyadenylate-binding protein 1-like 2	PABPC1;PABPC3;PABPC4;PABPC1L;C20orf119;PABPC1L2A	>tr|B3KT93|B3KT93_HUMAN cDNA FLJ37875 fis, cLone BRSSN2018771, highLy simiLar to PoLy(A)-binding protein 1 OS=Homo sapiens PE=2 SV=1;>sp|P11940|PABP1_HUMAN PoLyadenyLate-binding protein 1 OS=Homo sapiens GN=PABPC1 PE=1 SV=2;>tr|Q3ZCS4|Q3ZCS4_HUMAN PoLy(A)	1.5597
		>tr|B4DZW0|B4DZW0_HUMAN cDNA FLJ58821, highLy simiLar to Septin-6 OS=Homo sapiens PE=2 SV=1	1.5646
RNA-binding protein with serine-rich domain 1	RNPS1	>tr|D3DU92|D3DU92_HUMAN RNA binding protein S1 OS=Homo sapiens GN=RNPS1 PE=2 SV=1;>sp|Q15287|RNPS1_HUMAN RNA-binding protein with serine-rich domain 1 OS=Homo sapiens GN=RNPS1 PE=1 SV=1;>tr|H3BTC0|H3BTC0_HUMAN RNA-binding protein with serine-rich domain 1	1.5655
Poly(rC)-binding protein 2;Poly(rC)-binding protein 3	PCBP2;PCBP3	>sp|Q15366|PCBP2_HUMAN PoLy(rC)-binding protein 2 OS=Homo sapiens GN=PCBP2 PE=1 SV=1;>tr|B4DXP5|B4DXP5_HUMAN PoLy(rC)-binding protein 2 OS=Homo sapiens GN=PCBP2 PE=2 SV=1;>tr|F8VZX2|F8VZX2_HUMAN PoLy(rC)-binding protein 2 OS=Homo sapiens GN=PCBP2 PE=2 SV=1	1.5669
LIM and SH3 domain protein 1	LASP1	>tr|A8K1D2|A8K1D2_HUMAN cDNA FLJ76601, highLy simiLar to Homo sapiens LIM and SH3 protein 1 (LASP1), mRNA OS=Homo sapiens PE=2 SV=1;>sp|Q14847|LASP1_HUMAN LIM and SH3 domain protein 1 OS=Homo sapiens GN=LASP1 PE=1 SV=2;>tr|B4DJI4|B4DJI4_HUMAN cDNA FLJ58065	1.5778
Heat shock cognate 71 kDa protein	HSPA8	>sp|P11142|HSP7C_HUMAN Heat shock cognate 71 kDa protein OS=Homo sapiens GN=HSPA8 PE=1 SV=1;>tr|Q53GZ6|Q53GZ6_HUMAN Heat shock 70kDa protein 8 isoform 1 variant (Fragment) OS=Homo sapiens PE=2 SV=1;>tr|E9PKE3|E9PKE3_HUMAN Heat shock cognate 71 kDa protein	1.5834
Mitochondrial carrier homolog 1	MTCH1;PIG60	>tr|Q8IW90|Q8IW90_HUMAN MTCH1 protein (Fragment) OS=Homo sapiens GN=MTCH1 PE=2 SV=2;>tr|H0Y8C3|H0Y8C3_HUMAN MitochondriaL carrier homoLog 1 (Fragment) OS=Homo sapiens GN=MTCH1 PE=2 SV=1;>sp|Q9NZJ7|MTCH1_HUMAN MitochondriaL carrier homoLog 1 OS=Homo sapiens	1.5875
Nucleolar RNA helicase 2	DDX21	>sp|Q9NR30|DDX21_HUMAN NucLeoLar RNA heLicase 2 OS=Homo sapiens GN=DDX21 PE=1 SV=5	1.6218
Thyroid hormone receptor-associated protein 3	THRAP3	>sp|Q9Y2W1|TR150_HUMAN Thyroid hormone receptor-associated protein 3 OS=Homo sapiens GN=THRAP3 PE=1 SV=2	1.6252
60S ribosomal protein L19;Ribosomal protein L19	RPL19	>sp|P84098|RL19_HUMAN 60S ribosomaL protein L19 OS=Homo sapiens GN=RPL19 PE=1 SV=1;>tr|Q53G49|Q53G49_HUMAN RibosomaL protein L19 (Fragment) OS=Homo sapiens PE=2 SV=1;>tr|J3KTE4|J3KTE4_HUMAN RibosomaL protein L19 OS=Homo sapiens GN=RPL19 PE=3 SV=1;>tr|J3QR0	1.6873
		>P02769 SWISS-PROT:P02769 (Bos taurus) Bovine serum albumin precursor;>gi|CON_IPI00708398.1|SWISS-PROT:P02769 (Bos taurus) Bovine serum aLbumin precursor	1.6919
FACT complex subunit SPT16	SUPT16H	>sp|Q9Y5B9|SP16H_HUMAN FACT compLex subunit SPT16 OS=Homo sapiens GN=SUPT16H PE=1 SV=1	1.7223
Eukaryotic initiation factor 4A-I	EIF4A1	>tr|A8K088|A8K088_HUMAN cDNA FLJ78614, highLy simiLar to Homo sapiens eukaryotic transLation initiation factor 4A, isoform 1 (EIF4A1), mRNA OS=Homo sapiens PE=2 SV=1;>tr|A8K7F6|A8K7F6_HUMAN cDNA FLJ78244, highLy simiLar to Homo sapiens eukaryotic transLati	1.7294
Serine/arginine-rich splicing factor 9	SRSF9	>sp|Q13242|SRSF9_HUMAN Serine/arginine-rich spLicing factor 9 OS=Homo sapiens GN=SRSF9 PE=1 SV=1;>tr|H0YIB4|H0YIB4_HUMAN Serine/arginine-rich-spLicing factor 9 (Fragment) OS=Homo sapiens GN=SRSF9 PE=4 SV=1	1.7588
ATP-dependent RNA helicase DDX3X;ATP-dependent RNA helicase DDX3Y	DDX3X;DDX3Y	>tr|Q59GX6|Q59GX6_HUMAN DEAD/H (Asp-GLu-ALa-Asp/His) box poLypeptide 3 variant (Fragment) OS=Homo sapiens PE=2 SV=1;>tr|B5BTY4|B5BTY4_HUMAN ATP-dependent RNA heLicase DDX3X OS=Homo sapiens GN=DDX3X PE=2 SV=1;>sp|O00571|DDX3X_HUMAN ATP-dependent RNA heLicas	1.7864
Matrin-3	MATR3;DKFZp686K23100;DKFZp686K0542	>tr|A8MXP9|A8MXP9_HUMAN Matrin-3 OS=Homo sapiens GN=MATR3 PE=4 SV=1;>sp|P43243|MATR3_HUMAN Matrin-3 OS=Homo sapiens GN=MATR3 PE=1 SV=2;>tr|Q68D11|Q68D11_HUMAN Putative uncharacterized protein DKFZp686K23100 OS=Homo sapiens GN=DKFZp686K23100 PE=2 SV=1;>tr|D	1.8194
Actin-related protein 2/3 complex subunit 1B	ARPC1B	>tr|A4D275|A4D275_HUMAN Actin reLated protein 2/3 compLex, subunit 1B, 41kDa OS=Homo sapiens GN=ARPC1B PE=2 SV=1;>sp|O15143|ARC1B_HUMAN Actin-reLated protein 2/3 compLex subunit 1B OS=Homo sapiens GN=ARPC1B PE=1 SV=3	1.862
		>Q3SX09 TREMBL:Q3SX09 (Bos taurus) similar to HBG protein;>gi|CON_IPI00713928.4|TREMBL:Q3SX09 (Bos taurus) simiLar to HBG protein	1.885
Gamma-interferon-inducible protein 16	IFI16	>sp|Q16666|IF16_HUMAN Gamma-interferon-inducibLe protein 16 OS=Homo sapiens GN=IFI16 PE=1 SV=3;>tr|D3DUZ3|D3DUZ3_HUMAN Interferon, gamma-inducibLe protein 16, isoform CRA_a OS=Homo sapiens GN=IFI16 PE=4 SV=1;>tr|H3BR88|H3BR88_HUMAN Gamma-interferon-inducib	1.8962
Eukaryotic translation initiation factor 2 subunit 3;Putative eukaryotic translation initiation factor 2 subunit 3-like protein	EIF2S3;EIF2S3L	>tr|A8K2Y2|A8K2Y2_HUMAN cDNA FLJ78120, highLy simiLar to Homo sapiens eukaryotic transLation initiation factor 2, subunit 3 gamma, 52kDa (EIF2S3), mRNA OS=Homo sapiens PE=2 SV=1;>tr|B2R5N2|B2R5N2_HUMAN cDNA, FLJ92541, highLy simiLar to Homo sapiens eukaryo	1.9113
Probable ATP-dependent RNA helicase DDX5	DDX5;DKFZp686J01190	>tr|B5BUE6|B5BUE6_HUMAN ATP-dependent RNA heLicase DDX5 (Fragment) OS=Homo sapiens GN=DDX5 PE=2 SV=1;>tr|J3KTA4|J3KTA4_HUMAN ProbabLe ATP-dependent RNA heLicase DDX5 OS=Homo sapiens GN=DDX5 PE=3 SV=1;>sp|P17844|DDX5_HUMAN ProbabLe ATP-dependent RNA heLicas	1.9196
40S ribosomal protein S5;40S ribosomal protein S5, N-terminally processed	RPS5	>tr|M0R0R2|M0R0R2_HUMAN 40S ribosomaL protein S5 OS=Homo sapiens GN=RPS5 PE=3 SV=1;>sp|P46782|RS5_HUMAN 40S ribosomaL protein S5 OS=Homo sapiens GN=RPS5 PE=1 SV=4;>tr|Q53G25|Q53G25_HUMAN RibosomaL protein S5 variant (Fragment) OS=Homo sapiens PE=2 SV=1;>tr	1.9246
60S ribosomal protein L4	RPL4	>tr|Q59GY2|Q59GY2_HUMAN RibosomaL protein L4 variant (Fragment) OS=Homo sapiens PE=2 SV=1;>sp|P36578|RL4_HUMAN 60S ribosomaL protein L4 OS=Homo sapiens GN=RPL4 PE=1 SV=5;>tr|B4DMJ6|B4DMJ6_HUMAN cDNA FLJ50996, highLy simiLar to 60S ribosomaL protein L4 OS=H	1.9274
WD repeat-containing protein 1	WDR1	>tr|Q59ER5|Q59ER5_HUMAN WD repeat-containing protein 1 isoform 1 variant (Fragment) OS=Homo sapiens PE=2 SV=1;>sp|O75083|WDR1_HUMAN WD repeat-containing protein 1 OS=Homo sapiens GN=WDR1 PE=1 SV=4;>tr|Q53GN4|Q53GN4_HUMAN WD repeat domain 1, isoform CRA_a (	2.0428
		>P15497 SWISS-PROT:P15497 (Bos taurus) Apolipoprotein A-I precursor;>gi|CON_IPI00715548.1|SWISS-PROT:P15497 (Bos taurus) ApoLipoprotein A-I precursor	2.0877
Peptidyl-prolyl cis-trans isomerase B	PPIB	>sp|P23284|PPIB_HUMAN PeptidyL-proLyL cis-trans isomerase B OS=Homo sapiens GN=PPIB PE=1 SV=2	2.1057
DNA-binding protein A	CSDA	>sp|P16989|YBOX3_HUMAN Y-box-binding protein 3 OS=Homo sapiens GN=YBX3 PE=1 SV=4;>tr|Q96GD7|Q96GD7_HUMAN CSDA protein OS=Homo sapiens PE=2 SV=1;>tr|Q59EB5|Q59EB5_HUMAN CSDA protein variant (Fragment) OS=Homo sapiens PE=2 SV=1	2.1879
Protein arginine N-methyltransferase 1	PRMT1;HRMT1L2	>tr|H7C2I1|H7C2I1_HUMAN Protein arginine N-methyLtransferase 1 OS=Homo sapiens GN=PRMT1 PE=4 SV=1;>sp|Q99873|ANM1_HUMAN Protein arginine N-methyLtransferase 1 OS=Homo sapiens GN=PRMT1 PE=1 SV=2;>tr|Q5U8W9|Q5U8W9_HUMAN Protein arginine methyLtransferase 1 i	2.5099
Coagulation factor IX;Coagulation factor IXa light chain;Coagulation factor IXa heavy chain	factor IX F9;F9 p22;F9	>tr|F2RM35|F2RM35_HUMAN Serine protease OS=Homo sapiens GN=factor IX F9 PE=2 SV=1;>tr|F2RM37|F2RM37_HUMAN CoaguLation factor IX OS=Homo sapiens GN=F9 p22 PE=2 SV=1;>sp|P00740|FA9_HUMAN CoaguLation factor IX OS=Homo sapiens GN=F9 PE=1 SV=2;>tr|Q5FBE1|Q5FBE1	2.8581
		>P12763 SWISS-PROT:P12763 (Bos taurus) Alpha-2-HS-glycoprotein precursor;>gi|CON_IPI00707101.1|SWISS-PROT:P12763 (Bos taurus) ALpha-2-HS-gLycoprotein precursor	3.0444
Keratin, type I cytoskeletal 10	KRT10	>P13645 SWISS-PROT:P13645 Tax_Id=9606 Gene_Symbol=KRT10 Keratin, type I cytoskeletal 10;>gi|CON_IPI00009865.2|SWISS-PROT:P13645 Tax_Id=9606 Gene_SymboL=KRT10 Keratin, type I cytoskeLetaL 10;>sp|P13645|K1C10_HUMAN Keratin, type I cytoskeLetaL 10 OS=Homo sap	3.1438
		>P01966 SWISS-PROT:P01966 (Bos taurus) Hemoglobin subunit alpha;>gi|CON_IPI00710783.2|SWISS-PROT:P01966 (Bos taurus) HemogLobin subunit aLpha	5.0555
		>P00735 SWISS-PROT:P00735 (Bos taurus) Prothrombin precursor (Fragment);>gi|CON_IPI00710799.1|SWISS-PROT:P00735 (Bos taurus) Prothrombin precursor (Fragment)	5.7326
Uncharacterized protein CXorf65	CXorf65	>tr|C9J8K0|C9J8K0_HUMAN Uncharacterized protein CXorf65 (Fragment) OS=Homo sapiens GN=CXorf65 PE=2 SV=1;>sp|A6NEN9|CX065_HUMAN Uncharacterized protein CXorf65 OS=Homo sapiens GN=CXorf65 PE=2 SV=1	NaN
Transcriptional adapter 2-beta	TADA2B	>sp|Q86TJ2|TAD2B_HUMAN TranscriptionaL adapter 2-beta OS=Homo sapiens GN=TADA2B PE=1 SV=2;>tr|B3KX99|B3KX99_HUMAN cDNA FLJ45019 fis, cLone BRAWH3015825 OS=Homo sapiens PE=2 SV=1	NaN
Receptor-interacting serine/threonine-protein kinase 4	RIPK4;dik	>sp|P57078|RIPK4_HUMAN Receptor-interacting serine/threonine-protein kinase 4 OS=Homo sapiens GN=RIPK4 PE=1 SV=1;>tr|Q2TB16|Q2TB16_HUMAN Receptor-interacting serine-threonine kinase 4 OS=Homo sapiens GN=RIPK4 PE=2 SV=1;>tr|Q96T11|Q96T11_HUMAN cDNA FLJ14518	NaN
Zymogen granule protein 16 homolog B	EECP;ZG16B;PAUF	>tr|G8H6I3|G8H6I3_HUMAN Endocrine and exocrine protein OS=Homo sapiens GN=EECP PE=2 SV=1;>sp|Q96DA0|ZG16B_HUMAN Zymogen granuLe protein 16 homoLog B OS=Homo sapiens GN=ZG16B PE=1 SV=3;>tr|C3PTT6|C3PTT6_HUMAN Pancreatic adenocarcinoma upreguLated factor OS=	NaN
Rho guanine nucleotide exchange factor 18	ARHGEF18;hCG_22253	>sp|Q6ZSZ5|ARHGI_HUMAN Rho guanine nucLeotide exchange factor 18 OS=Homo sapiens GN=ARHGEF18 PE=1 SV=3;>tr|M0R150|M0R150_HUMAN Uncharacterized protein (Fragment) OS=Homo sapiens PE=4 SV=1;>tr|D6W646|D6W646_HUMAN HCG22253, isoform CRA_a OS=Homo sapiens GN=h	NaN
	CAMTA1	>tr|H0YJK7|H0YJK7_HUMAN CaLmoduLin-binding transcription activator 1 (Fragment) OS=Homo sapiens GN=CAMTA1 PE=4 SV=1	NaN
	SON	>tr|H7C1M2|H7C1M2_HUMAN Protein SON (Fragment) OS=Homo sapiens GN=SON PE=4 SV=1	NaN
Ubinuclein-2	UBN2	>sp|Q6ZU65|UBN2_HUMAN UbinucLein-2 OS=Homo sapiens GN=UBN2 PE=1 SV=2;>tr|H7C4P8|H7C4P8_HUMAN UbinucLein-2 (Fragment) OS=Homo sapiens GN=UBN2 PE=4 SV=1	NaN
		>tr|L0R5B6|L0R5B6_HUMAN ALternative protein KDM2A OS=Homo sapiens GN=KDM2A PE=4 SV=1	NaN
Cation-independent mannose-6-phosphate receptor	IGF2R	>sp|P11717|MPRI_HUMAN Cation-independent mannose-6-phosphate receptor OS=Homo sapiens GN=IGF2R PE=1 SV=3;>tr|Q59EZ3|Q59EZ3_HUMAN InsuLin-Like growth factor 2 receptor variant (Fragment) OS=Homo sapiens PE=2 SV=1	NaN
	DYNC1H1	>tr|Q6P2H7|Q6P2H7_HUMAN DYNC1H1 protein OS=Homo sapiens GN=DYNC1H1 PE=2 SV=1	NaN
Zinc finger protein 407	ZNF407	>sp|Q9C0G0|ZN407_HUMAN Zinc finger protein 407 OS=Homo sapiens GN=ZNF407 PE=1 SV=2	NaN
