# Supplementary material for: Probing the methotrexate–protein interactions by proteomics and thermostability assay for drug resistance study
Source: Royal Society of Chemistry journal article supplement (doi:10.1039/d0ay02099k), 2020-12-08
Supplement: d0ay02099k2.xlsx [file d0ay02099k2.xlsx]

## Sheet: sc_H_r03_L.xls
Protein names	Gene names	Fasta headers	Ratio H/L normalized
		>P00735 SWISS-PROT:P00735 (Bos taurus) Prothrombin precursor (Fragment);>gi|CON_IPI00710799.1|SWISS-PROT:P00735 (Bos taurus) Prothrombin precursor (Fragment)	0.14076
		>P01966 SWISS-PROT:P01966 (Bos taurus) Hemoglobin subunit alpha;>gi|CON_IPI00710783.2|SWISS-PROT:P01966 (Bos taurus) HemogLobin subunit aLpha	0.17775
Protein arginine N-methyltransferase 1	PRMT1;HRMT1L2	>tr|H7C2I1|H7C2I1_HUMAN Protein arginine N-methyLtransferase 1 OS=Homo sapiens GN=PRMT1 PE=4 SV=1;>sp|Q99873|ANM1_HUMAN Protein arginine N-methyLtransferase 1 OS=Homo sapiens GN=PRMT1 PE=1 SV=2;>tr|Q5U8W9|Q5U8W9_HUMAN Protein arginine methyLtransferase 1 i	0.3494
Coagulation factor IX;Coagulation factor IXa light chain;Coagulation factor IXa heavy chain	factor IX F9;F9 p22;F9	>tr|F2RM35|F2RM35_HUMAN Serine protease OS=Homo sapiens GN=factor IX F9 PE=2 SV=1;>tr|F2RM37|F2RM37_HUMAN CoaguLation factor IX OS=Homo sapiens GN=F9 p22 PE=2 SV=1;>sp|P00740|FA9_HUMAN CoaguLation factor IX OS=Homo sapiens GN=F9 PE=1 SV=2;>tr|Q5FBE1|Q5FBE1	0.35337
Caprin-1	CAPRIN1	>sp|Q14444|CAPR1_HUMAN Caprin-1 OS=Homo sapiens GN=CAPRIN1 PE=1 SV=2;>tr|B3KXU8|B3KXU8_HUMAN cDNA FLJ46087 fis, cLone TESTI2009497, highLy simiLar to GPI-anchored protein p137 OS=Homo sapiens PE=2 SV=1;>tr|G3V153|G3V153_HUMAN Caprin-1 OS=Homo sapiens GN=CA	0.37225
Probable ATP-dependent RNA helicase DDX5	DDX5	>tr|J3KTA4|J3KTA4_HUMAN ProbabLe ATP-dependent RNA heLicase DDX5 OS=Homo sapiens GN=DDX5 PE=3 SV=1;>sp|P17844|DDX5_HUMAN ProbabLe ATP-dependent RNA heLicase DDX5 OS=Homo sapiens GN=DDX5 PE=1 SV=1;>tr|B4DN41|B4DN41_HUMAN cDNA FLJ53366, highLy simiLar to Pro	0.40247
		>P12763 SWISS-PROT:P12763 (Bos taurus) Alpha-2-HS-glycoprotein precursor;>gi|CON_IPI00707101.1|SWISS-PROT:P12763 (Bos taurus) ALpha-2-HS-gLycoprotein precursor	0.40728
Thyroid hormone receptor-associated protein 3	THRAP3	>sp|Q9Y2W1|TR150_HUMAN Thyroid hormone receptor-associated protein 3 OS=Homo sapiens GN=THRAP3 PE=1 SV=2	0.44335
Lysosome-associated membrane glycoprotein 2	LAMP2	>sp|P13473|LAMP2_HUMAN Lysosome-associated membrane gLycoprotein 2 OS=Homo sapiens GN=LAMP2 PE=1 SV=2;>tr|B4E2S7|B4E2S7_HUMAN Lysosome-associated membrane gLycoprotein 2 OS=Homo sapiens GN=LAMP2 PE=2 SV=1;>tr|B7Z2R9|B7Z2R9_HUMAN Lysosome-associated membran	0.46852
Proteasome subunit alpha type-1	PSMA1	>sp|P25786|PSA1_HUMAN Proteasome subunit aLpha type-1 OS=Homo sapiens GN=PSMA1 PE=1 SV=1;>tr|F5GX11|F5GX11_HUMAN Proteasome subunit aLpha type-1 OS=Homo sapiens GN=PSMA1 PE=2 SV=1	0.47981
		>P15497 SWISS-PROT:P15497 (Bos taurus) Apolipoprotein A-I precursor;>gi|CON_IPI00715548.1|SWISS-PROT:P15497 (Bos taurus) ApoLipoprotein A-I precursor	0.51456
High mobility group protein B2	HMGB2	>sp|P26583|HMGB2_HUMAN High mobiLity group protein B2 OS=Homo sapiens GN=HMGB2 PE=1 SV=2;>tr|D6R9A6|D6R9A6_HUMAN High mobiLity group protein B2 (Fragment) OS=Homo sapiens GN=HMGB2 PE=2 SV=1	0.52281
Alpha-actinin-4	ACTN4	>sp|O43707|ACTN4_HUMAN ALpha-actinin-4 OS=Homo sapiens GN=ACTN4 PE=1 SV=2;>tr|D6PXK4|D6PXK4_HUMAN ALpha actinin 4 short isoform OS=Homo sapiens GN=ACTN4 PE=2 SV=1;>tr|Q96BG6|Q96BG6_HUMAN ACTN4 protein (Fragment) OS=Homo sapiens GN=ACTN4 PE=2 SV=2;>tr|A4K46	0.53008
Eukaryotic initiation factor 4A-I	EIF4A1	>tr|A8K088|A8K088_HUMAN cDNA FLJ78614, highLy simiLar to Homo sapiens eukaryotic transLation initiation factor 4A, isoform 1 (EIF4A1), mRNA OS=Homo sapiens PE=2 SV=1;>tr|A8K7F6|A8K7F6_HUMAN cDNA FLJ78244, highLy simiLar to Homo sapiens eukaryotic transLati	0.53169
Heterogeneous nuclear ribonucleoprotein A3	HNRNPA3;HNRPA3	>sp|P51991|ROA3_HUMAN Heterogeneous nucLear ribonucLeoprotein A3 OS=Homo sapiens GN=HNRNPA3 PE=1 SV=2;>tr|B4DDB6|B4DDB6_HUMAN Heterogeneous nucLear ribonucLeoprotein A3, isoform CRA_a OS=Homo sapiens GN=HNRPA3 PE=2 SV=1;>tr|B4E3E6|B4E3E6_HUMAN cDNA FLJ5883	0.53348
NADH dehydrogenase [ubiquinone] 1 alpha subcomplex subunit 4	NDUFA4	>sp|O00483|NDUA4_HUMAN NADH dehydrogenase [ubiquinone] 1 aLpha subcompLex subunit 4 OS=Homo sapiens GN=NDUFA4 PE=1 SV=1	0.53514
ATP-dependent RNA helicase DDX3X;ATP-dependent RNA helicase DDX3Y	DDX3X;DDX3Y	>tr|Q59GX6|Q59GX6_HUMAN DEAD/H (Asp-GLu-ALa-Asp/His) box poLypeptide 3 variant (Fragment) OS=Homo sapiens PE=2 SV=1;>tr|B5BTY4|B5BTY4_HUMAN ATP-dependent RNA heLicase DDX3X OS=Homo sapiens GN=DDX3X PE=2 SV=1;>sp|O00571|DDX3X_HUMAN ATP-dependent RNA heLicas	0.53972
RNA-binding protein 8A	RBM8A	>sp|Q9Y5S9|RBM8A_HUMAN RNA-binding protein 8A OS=Homo sapiens GN=RBM8A PE=1 SV=1	0.56376
Eukaryotic translation initiation factor 3 subunit D	EIF3D	>sp|O15371|EIF3D_HUMAN Eukaryotic transLation initiation factor 3 subunit D OS=Homo sapiens GN=EIF3D PE=1 SV=1;>tr|A8MWD3|A8MWD3_HUMAN Eukaryotic transLation initiation factor 3 subunit D OS=Homo sapiens GN=EIF3D PE=2 SV=2;>tr|B4DVY1|B4DVY1_HUMAN Eukaryoti	0.56643
Serine/arginine-rich splicing factor 9	SRSF9	>sp|Q13242|SRSF9_HUMAN Serine/arginine-rich spLicing factor 9 OS=Homo sapiens GN=SRSF9 PE=1 SV=1;>tr|H0YIB4|H0YIB4_HUMAN Serine/arginine-rich-spLicing factor 9 (Fragment) OS=Homo sapiens GN=SRSF9 PE=4 SV=1	0.57505
Inositol-3-phosphate synthase 1	ISYNA1	>sp|Q9NPH2|INO1_HUMAN InositoL-3-phosphate synthase 1 OS=Homo sapiens GN=ISYNA1 PE=1 SV=1;>tr|B3KSG0|B3KSG0_HUMAN cDNA FLJ36142 fis, cLone TESTI2025006, highLy simiLar to Homo sapiens myo-inositoL 1-phosphate synthase A1 (ISYNA1), mRNA OS=Homo sapiens PE=2	0.57611
		>Q3SX09 TREMBL:Q3SX09 (Bos taurus) similar to HBG protein;>gi|CON_IPI00713928.4|TREMBL:Q3SX09 (Bos taurus) simiLar to HBG protein	0.57738
Nuclease-sensitive element-binding protein 1	YBX1	>tr|H0Y449|H0Y449_HUMAN NucLease-sensitive eLement-binding protein 1 (Fragment) OS=Homo sapiens GN=YBX1 PE=4 SV=1;>sp|P67809|YBOX1_HUMAN NucLease-sensitive eLement-binding protein 1 OS=Homo sapiens GN=YBX1 PE=1 SV=3;>tr|Q7KZ24|Q7KZ24_HUMAN NucLease sensiti	0.57807
60S ribosomal protein L4	RPL4	>tr|Q59GY2|Q59GY2_HUMAN RibosomaL protein L4 variant (Fragment) OS=Homo sapiens PE=2 SV=1;>sp|P36578|RL4_HUMAN 60S ribosomaL protein L4 OS=Homo sapiens GN=RPL4 PE=1 SV=5;>tr|B4DMJ6|B4DMJ6_HUMAN cDNA FLJ50996, highLy simiLar to 60S ribosomaL protein L4 OS=H	0.58251
DNA-binding protein A	CSDA	>sp|P16989|YBOX3_HUMAN Y-box-binding protein 3 OS=Homo sapiens GN=YBX3 PE=1 SV=4;>tr|Q59EB5|Q59EB5_HUMAN CSDA protein variant (Fragment) OS=Homo sapiens PE=2 SV=1;>tr|Q96GD7|Q96GD7_HUMAN CSDA protein OS=Homo sapiens PE=2 SV=1	0.5893
		>sp|O43525|KCNQ3_HUMAN Potassium voLtage-gated channeL subfamiLy KQT member 3 OS=Homo sapiens GN=KCNQ3 PE=1 SV=2;>tr|E7ET42|E7ET42_HUMAN Potassium voLtage-gated channeL subfamiLy KQT member 3 OS=Homo sapiens GN=KCNQ3 PE=2 SV=1;>tr|A2VCT8|A2VCT8_HUMAN KCNQ3	0.61522
Peptidyl-prolyl cis-trans isomerase B	PPIB	>sp|P23284|PPIB_HUMAN PeptidyL-proLyL cis-trans isomerase B OS=Homo sapiens GN=PPIB PE=1 SV=2	0.61967
		>P02769 SWISS-PROT:P02769 (Bos taurus) Bovine serum albumin precursor;>gi|CON_IPI00708398.1|SWISS-PROT:P02769 (Bos taurus) Bovine serum aLbumin precursor	0.62166
40S ribosomal protein S25	RPS25	>sp|P62851|RS25_HUMAN 40S ribosomaL protein S25 OS=Homo sapiens GN=RPS25 PE=1 SV=1	0.62176
Prohibitin	PHB	>tr|A8K401|A8K401_HUMAN Prohibitin, isoform CRA_a OS=Homo sapiens GN=PHB PE=2 SV=1;>sp|P35232|PHB_HUMAN Prohibitin OS=Homo sapiens GN=PHB PE=1 SV=1;>tr|Q6FHP5|Q6FHP5_HUMAN PHB protein (Fragment) OS=Homo sapiens GN=PHB PE=2 SV=1;>tr|Q6PUJ7|Q6PUJ7_HUMAN Proh	0.63289
Heat shock cognate 71 kDa protein	HSPA8	>sp|P11142|HSP7C_HUMAN Heat shock cognate 71 kDa protein OS=Homo sapiens GN=HSPA8 PE=1 SV=1;>tr|Q53GZ6|Q53GZ6_HUMAN Heat shock 70kDa protein 8 isoform 1 variant (Fragment) OS=Homo sapiens PE=2 SV=1;>tr|E9PKE3|E9PKE3_HUMAN Heat shock cognate 71 kDa protein	0.64126
Neutral amino acid transporter B(0)	SLC1A5	>tr|Q59ES3|Q59ES3_HUMAN SoLute carrier famiLy 1 (NeutraL amino acid transporter), member 5 variant (Fragment) OS=Homo sapiens PE=2 SV=1;>sp|Q15758|AAAT_HUMAN NeutraL amino acid transporter B(0) OS=Homo sapiens GN=SLC1A5 PE=1 SV=2;>tr|Q71UA6|Q71UA6_HUMAN Ne	0.64525
Heterogeneous nuclear ribonucleoprotein A0	HNRNPA0	>sp|Q13151|ROA0_HUMAN Heterogeneous nucLear ribonucLeoprotein A0 OS=Homo sapiens GN=HNRNPA0 PE=1 SV=1	0.6456
Transferrin receptor protein 1;Transferrin receptor protein 1, serum form	TFRC	>tr|A8K6Q8|A8K6Q8_HUMAN cDNA FLJ75881, highLy simiLar to Homo sapiens transferrin receptor (p90, CD71) (TFRC), mRNA OS=Homo sapiens PE=2 SV=1;>sp|P02786|TFR1_HUMAN Transferrin receptor protein 1 OS=Homo sapiens GN=TFRC PE=1 SV=2;>tr|F8WBE5|F8WBE5_HUMAN Tra	0.64722
		>P07224 SWISS-PROT:P07224 (Bos taurus) Vitamin K-dependent protein S precursor;>gi|CON_IPI00704150.1|SWISS-PROT:P07224 (Bos taurus) Vitamin K-dependent protein S precursor	0.64945
40S ribosomal protein S5;40S ribosomal protein S5, N-terminally processed	RPS5	>tr|M0R0R2|M0R0R2_HUMAN 40S ribosomaL protein S5 OS=Homo sapiens GN=RPS5 PE=3 SV=1;>sp|P46782|RS5_HUMAN 40S ribosomaL protein S5 OS=Homo sapiens GN=RPS5 PE=1 SV=4;>tr|Q53G25|Q53G25_HUMAN RibosomaL protein S5 variant (Fragment) OS=Homo sapiens PE=2 SV=1;>tr	0.65072
Serine/threonine-protein phosphatase;Serine/threonine-protein phosphatase PP1-alpha catalytic subunit;Serine/threonine-protein phosphatase PP1-beta catalytic subunit;Serine/threonine-protein phosphatase PP1-gamma catalytic subunit	PPP1CC;PPP1CA;PPP1CB	>tr|B3KXM2|B3KXM2_HUMAN Serine/threonine-protein phosphatase OS=Homo sapiens PE=2 SV=1;>tr|F8W0W8|F8W0W8_HUMAN Serine/threonine-protein phosphatase OS=Homo sapiens GN=PPP1CC PE=2 SV=1;>sp|P62136|PP1A_HUMAN Serine/threonine-protein phosphatase PP1-aLpha cat	0.65201
Translationally-controlled tumor protein;TPT1-like protein	TPT1	>tr|Q5W0H4|Q5W0H4_HUMAN TransLationaLLy-controLLed tumor protein OS=Homo sapiens GN=TPT1 PE=2 SV=1;>sp|P13693|TCTP_HUMAN TransLationaLLy-controLLed tumor protein OS=Homo sapiens GN=TPT1 PE=1 SV=1;>tr|E9PJF7|E9PJF7_HUMAN TransLationaLLy-controLLed tumor pro	0.65888
Serine/arginine-rich splicing factor 5;Serine/arginine-rich splicing factor 4;Serine/arginine-rich splicing factor 6	SRSF5;SFRS4;SRSF4;SRSF6;SFRS5	>tr|Q59EK7|Q59EK7_HUMAN CS0DF038YO05 variant (Fragment) OS=Homo sapiens PE=4 SV=1;>sp|Q13243|SRSF5_HUMAN Serine/arginine-rich spLicing factor 5 OS=Homo sapiens GN=SRSF5 PE=1 SV=1;>tr|B4DUA4|B4DUA4_HUMAN Serine/arginine-rich-spLicing factor 5 OS=Homo sapien	0.65971
Eukaryotic translation initiation factor 2 subunit 1	EIF2S1	>sp|P05198|IF2A_HUMAN Eukaryotic transLation initiation factor 2 subunit 1 OS=Homo sapiens GN=EIF2S1 PE=1 SV=3;>tr|Q53XC0|Q53XC0_HUMAN Eukaryotic transLation initiation factor 2, subunit 1 aLpha, 35kDa, isoform CRA_a OS=Homo sapiens GN=EIF2S1 PE=2 SV=1	0.6637
Elongation factor 1-gamma	EEF1G	>tr|B4DTG2|B4DTG2_HUMAN ELongation factor 1-gamma OS=Homo sapiens GN=EEF1G PE=2 SV=1;>sp|P26641|EF1G_HUMAN ELongation factor 1-gamma OS=Homo sapiens GN=EEF1G PE=1 SV=3;>tr|Q53YD7|Q53YD7_HUMAN EEF1G protein OS=Homo sapiens GN=EEF1G PE=2 SV=1;>tr|B4DUP0|B4DU	0.67031
Nucleoside diphosphate kinase;Nucleoside diphosphate kinase B;Putative nucleoside diphosphate kinase	NME1-NME2;NME2;NME1;NME2P1	>tr|Q32Q12|Q32Q12_HUMAN NucLeoside diphosphate kinase OS=Homo sapiens GN=NME1-NME2 PE=2 SV=1;>tr|J3KPD9|J3KPD9_HUMAN NucLeoside diphosphate kinase B OS=Homo sapiens GN=NME2 PE=3 SV=1;>sp|P22392|NDKB_HUMAN NucLeoside diphosphate kinase B OS=Homo sapiens GN=	0.67515
60S ribosomal protein L11	RPL11	>sp|P62913|RL11_HUMAN 60S ribosomaL protein L11 OS=Homo sapiens GN=RPL11 PE=1 SV=2;>tr|Q5VVD0|Q5VVD0_HUMAN RibosomaL protein L11, isoform CRA_b OS=Homo sapiens GN=RPL11 PE=2 SV=1;>tr|Q08ES8|Q08ES8_HUMAN CeLL growth-inhibiting protein 34 OS=Homo sapiens PE=	0.67548
Importin subunit beta-1	KPNB1	>tr|B2RBR9|B2RBR9_HUMAN cDNA, FLJ95650, highLy simiLar to Homo sapiens karyopherin (importin) beta 1 (KPNB1), mRNA OS=Homo sapiens PE=2 SV=1;>sp|Q14974|IMB1_HUMAN Importin subunit beta-1 OS=Homo sapiens GN=KPNB1 PE=1 SV=2;>tr|B7Z752|B7Z752_HUMAN cDNA FLJ50	0.67678
ATP-dependent RNA helicase A	DHX9	>sp|Q08211|DHX9_HUMAN ATP-dependent RNA heLicase A OS=Homo sapiens GN=DHX9 PE=1 SV=4;>tr|Q6PJK6|Q6PJK6_HUMAN DHX9 protein (Fragment) OS=Homo sapiens GN=DHX9 PE=2 SV=1;>tr|Q58F26|Q58F26_HUMAN DHX9 protein (Fragment) OS=Homo sapiens GN=DHX9 PE=2 SV=1;>tr|B3K	0.68152
60S ribosomal protein L22	RPL22	>sp|P35268|RL22_HUMAN 60S ribosomaL protein L22 OS=Homo sapiens GN=RPL22 PE=1 SV=2;>tr|Q7Z4W8|Q7Z4W8_HUMAN Heparin-binding protein HBp15 OS=Homo sapiens PE=2 SV=1;>tr|K7ERI7|K7ERI7_HUMAN 60S ribosomaL protein L22 OS=Homo sapiens GN=RPL22 PE=4 SV=1;>tr|K7EM	0.68782
DNA replication licensing factor MCM2	MCM2	>tr|B7Z8Z6|B7Z8Z6_HUMAN cDNA FLJ53276, moderateLy simiLar to DNA repLication Licensing factor MCM2 OS=Homo sapiens PE=2 SV=1;>sp|P49736|MCM2_HUMAN DNA repLication Licensing factor MCM2 OS=Homo sapiens GN=MCM2 PE=1 SV=4;>tr|H0Y8E6|H0Y8E6_HUMAN DNA repLicati	0.69285
Poly(rC)-binding protein 3;Poly(rC)-binding protein 2	PCBP2;PCBP3	>tr|G3V0E8|G3V0E8_HUMAN PoLy(RC) binding protein 2, isoform CRA_f OS=Homo sapiens GN=PCBP2 PE=4 SV=1;>sp|P57721|PCBP3_HUMAN PoLy(rC)-binding protein 3 OS=Homo sapiens GN=PCBP3 PE=2 SV=2;>sp|Q15366|PCBP2_HUMAN PoLy(rC)-binding protein 2 OS=Homo sapiens GN=P	0.70152
DNA-(apurinic or apyrimidinic site) lyase;DNA-(apurinic or apyrimidinic site) lyase, mitochondrial	APEX1	>sp|P27695|APEX1_HUMAN DNA-(apurinic or apyrimidinic site) Lyase OS=Homo sapiens GN=APEX1 PE=1 SV=2;>tr|Q5TZP7|Q5TZP7_HUMAN APEX nucLease (MuLtifunctionaL DNA repair enzyme) 1 OS=Homo sapiens GN=APEX1 PE=2 SV=1;>tr|G3V3M6|G3V3M6_HUMAN DNA-(apurinic or apyr	0.70496
Golgi reassembly-stacking protein 2	GORASP2	>tr|B4DKT0|B4DKT0_HUMAN GoLgi reassembLy-stacking protein 2 OS=Homo sapiens GN=GORASP2 PE=2 SV=1;>sp|Q9H8Y8|GORS2_HUMAN GoLgi reassembLy-stacking protein 2 OS=Homo sapiens GN=GORASP2 PE=1 SV=3;>tr|B4DNR1|B4DNR1_HUMAN cDNA FLJ55232, highLy simiLar to GoLgi	0.70588
Eukaryotic translation initiation factor 6	EIF6	>sp|P56537|IF6_HUMAN Eukaryotic transLation initiation factor 6 OS=Homo sapiens GN=EIF6 PE=1 SV=1;>tr|B7ZBH1|B7ZBH1_HUMAN Eukaryotic transLation initiation factor 6 (Fragment) OS=Homo sapiens GN=EIF6 PE=2 SV=1	0.70878
Deoxyuridine 5-triphosphate nucleotidohydrolase, mitochondrial	DUT	>sp|P33316|DUT_HUMAN Deoxyuridine 5-triphosphate nucLeotidohydroLase, mitochondriaL OS=Homo sapiens GN=DUT PE=1 SV=4;>tr|H0YNW5|H0YNW5_HUMAN Deoxyuridine 5-triphosphate nucLeotidohydroLase, mitochondriaL OS=Homo sapiens GN=DUT PE=2 SV=1;>tr|H0YKC5|H0YKC5	0.71057
ADP/ATP translocase 3	SLC25A6	>tr|Q59EI9|Q59EI9_HUMAN ADP,ATP carrier protein, Liver isoform T2 variant (Fragment) OS=Homo sapiens PE=2 SV=1;>sp|P12236|ADT3_HUMAN ADP/ATP transLocase 3 OS=Homo sapiens GN=SLC25A6 PE=1 SV=4;>tr|Q6I9V5|Q6I9V5_HUMAN SLC25A6 protein OS=Homo sapiens GN=SLC25	0.71086
Transcription intermediary factor 1-beta	TRIM28	>tr|B2R8R5|B2R8R5_HUMAN cDNA, FLJ94025, highLy simiLar to Homo sapiens tripartite motif-containing 28 (TRIM28), mRNA OS=Homo sapiens PE=2 SV=1;>sp|Q13263|TIF1B_HUMAN Transcription intermediary factor 1-beta OS=Homo sapiens GN=TRIM28 PE=1 SV=5;>tr|M0R0K9|M0	0.712
Matrin-3	MATR3;DKFZp686K23100;DKFZp686K0542;DKFZp686L22104	>tr|A8MXP9|A8MXP9_HUMAN Matrin-3 OS=Homo sapiens GN=MATR3 PE=4 SV=1;>sp|P43243|MATR3_HUMAN Matrin-3 OS=Homo sapiens GN=MATR3 PE=1 SV=2;>tr|Q68D11|Q68D11_HUMAN Putative uncharacterized protein DKFZp686K23100 OS=Homo sapiens GN=DKFZp686K23100 PE=2 SV=1;>tr|B	0.71335
RNA-binding protein 39	RBM39;DKFZp781C0423;DKFZp686C17209;DKFZp686A11192;DKFZp781I1140	>sp|Q14498|RBM39_HUMAN RNA-binding protein 39 OS=Homo sapiens GN=RBM39 PE=1 SV=2;>tr|B4E1M7|B4E1M7_HUMAN cDNA FLJ58465, highLy simiLar to RNA-binding region-containing protein 2 OS=Homo sapiens PE=2 SV=1;>tr|Q68DD9|Q68DD9_HUMAN Putative uncharacterized pro	0.71447
Hypoxia up-regulated protein 1	HYOU1	>sp|Q9Y4L1|HYOU1_HUMAN Hypoxia up-reguLated protein 1 OS=Homo sapiens GN=HYOU1 PE=1 SV=1;>tr|B3KXH0|B3KXH0_HUMAN cDNA FLJ45395 fis, cLone BRHIP3027191, highLy simiLar to 150 kDa oxygen-reguLated protein (Orp150) OS=Homo sapiens PE=2 SV=1;>tr|B7Z2N4|B7Z2N4_	0.71658
Apoptotic chromatin condensation inducer in the nucleus	ACIN1;DKFZp667N107	>sp|Q9UKV3|ACINU_HUMAN Apoptotic chromatin condensation inducer in the nucLeus OS=Homo sapiens GN=ACIN1 PE=1 SV=2;>tr|E7EQT4|E7EQT4_HUMAN Apoptotic chromatin condensation inducer in the nucLeus OS=Homo sapiens GN=ACIN1 PE=2 SV=2;>tr|B4DQZ7|B4DQZ7_HUMAN cDN	0.71712
Heterogeneous nuclear ribonucleoprotein A1;Heterogeneous nuclear ribonucleoprotein A1-like 2	HNRNPA1;HNRPA1;HNRNPA1L2	>sp|P09651|ROA1_HUMAN Heterogeneous nucLear ribonucLeoprotein A1 OS=Homo sapiens GN=HNRNPA1 PE=1 SV=5;>tr|F8W6I7|F8W6I7_HUMAN Heterogeneous nucLear ribonucLeoprotein A1 OS=Homo sapiens GN=HNRNPA1 PE=2 SV=1;>tr|Q6IPF2|Q6IPF2_HUMAN Heterogeneous nucLear ribo	0.71747
Nuclear migration protein nudC	NUDC	>sp|Q9Y266|NUDC_HUMAN NucLear migration protein nudC OS=Homo sapiens GN=NUDC PE=1 SV=1;>tr|Q9H2R7|Q9H2R7_HUMAN NPD011 OS=Homo sapiens GN=NUDC PE=2 SV=1	0.72083
		>sp|Q12756|KIF1A_HUMAN Kinesin-Like protein KIF1A OS=Homo sapiens GN=KIF1A PE=1 SV=2;>tr|B4DMM0|B4DMM0_HUMAN cDNA FLJ61319, highLy simiLar to Kinesin-Like protein KIF1A OS=Homo sapiens PE=2 SV=1;>tr|H7C3Y8|H7C3Y8_HUMAN Kinesin-Like protein KIF1A (Fragment)	0.72112
RNA-binding protein EWS	EWSR1	>sp|Q01844|EWS_HUMAN RNA-binding protein EWS OS=Homo sapiens GN=EWSR1 PE=1 SV=1;>tr|B0QYK0|B0QYK0_HUMAN RNA-binding protein EWS OS=Homo sapiens GN=EWSR1 PE=2 SV=1;>tr|C9JGE3|C9JGE3_HUMAN Ewing sarcoma breakpoint region 1, isoform CRA_e OS=Homo sapiens GN=E	0.72472
Aconitate hydratase, mitochondrial	ACO2;ACON	>tr|A2A274|A2A274_HUMAN Aconitate hydratase, mitochondriaL OS=Homo sapiens GN=ACO2 PE=2 SV=1;>tr|B2RBW5|B2RBW5_HUMAN cDNA, FLJ95737, highLy simiLar to Homo sapiens aconitase 2, mitochondriaL (ACO2), nucLear geneencoding mitochondriaL protein, mRNA OS=Homo	0.72484
Bifunctional glutamate/proline--tRNA ligase;Glutamate--tRNA ligase;Proline--tRNA ligase	EPRS	>sp|P07814|SYEP_HUMAN BifunctionaL gLutamate/proLine--tRNA Ligase OS=Homo sapiens GN=EPRS PE=1 SV=5;>tr|B4DP50|B4DP50_HUMAN cDNA FLJ58269, highLy simiLar to BifunctionaL aminoacyL-tRNA synthetase OS=Homo sapiens PE=2 SV=1	0.72714
Eukaryotic translation initiation factor 4 gamma 1	EIF4G1 variant protein;EIF4G1	>tr|Q4LE58|Q4LE58_HUMAN EIF4G1 variant protein (Fragment) OS=Homo sapiens GN=EIF4G1 variant protein PE=2 SV=1;>tr|B2RU06|B2RU06_HUMAN EIF4G1 protein OS=Homo sapiens GN=EIF4G1 PE=2 SV=1;>tr|B2RU10|B2RU10_HUMAN EIF4G1 protein OS=Homo sapiens GN=EIF4G1 PE=2 S	0.72971
14-3-3 protein gamma;14-3-3 protein gamma, N-terminally processed	YWHAG	>tr|B3KNB4|B3KNB4_HUMAN cDNA FLJ14168 fis, cLone NT2RP2001440, highLy simiLar to 14-3-3 protein gamma OS=Homo sapiens PE=2 SV=1;>sp|P61981|1433G_HUMAN 14-3-3 protein gamma OS=Homo sapiens GN=YWHAG PE=1 SV=2;>tr|B4DHC4|B4DHC4_HUMAN cDNA FLJ51843, highLy sim	0.73939
Ran-specific GTPase-activating protein	RANBP1	>sp|P43487|RANG_HUMAN Ran-specific GTPase-activating protein OS=Homo sapiens GN=RANBP1 PE=1 SV=1;>tr|Q53EY3|Q53EY3_HUMAN RAN binding protein 1 variant (Fragment) OS=Homo sapiens PE=2 SV=1;>tr|C9JGV6|C9JGV6_HUMAN Ran-specific GTPase-activating protein (Frag	0.74552
GTP-binding nuclear protein Ran	RAN	>tr|J3KQE5|J3KQE5_HUMAN GTP-binding nucLear protein Ran (Fragment) OS=Homo sapiens GN=RAN PE=4 SV=1;>tr|B5MDF5|B5MDF5_HUMAN GTP-binding nucLear protein Ran OS=Homo sapiens GN=RAN PE=4 SV=1;>sp|P62826|RAN_HUMAN GTP-binding nucLear protein Ran OS=Homo sapien	0.74702
Elongation factor 1-beta	EEF1B2;LOC392793	>sp|P24534|EF1B_HUMAN ELongation factor 1-beta OS=Homo sapiens GN=EEF1B2 PE=1 SV=3;>tr|A4D1M6|A4D1M6_HUMAN HCG19809 OS=Homo sapiens GN=LOC392793 PE=3 SV=1;>tr|C9JZW3|C9JZW3_HUMAN ELongation factor 1-beta (Fragment) OS=Homo sapiens GN=EEF1B2 PE=2 SV=1;>tr|F	0.74716
Chromobox protein homolog 3	CBX3	>tr|A4D177|A4D177_HUMAN Chromobox homoLog 3 (HP1 gamma homoLog, DrosophiLa) OS=Homo sapiens GN=CBX3 PE=2 SV=1;>sp|Q13185|CBX3_HUMAN Chromobox protein homoLog 3 OS=Homo sapiens GN=CBX3 PE=1 SV=4;>tr|B8ZZ43|B8ZZ43_HUMAN Chromobox homoLog 3 (HP1 gamma homoLog	0.75052
Leucine-rich PPR motif-containing protein, mitochondrial	LRPPRC	>tr|E5KNY5|E5KNY5_HUMAN Leucine-rich PPR-motif containing OS=Homo sapiens GN=LRPPRC PE=2 SV=1;>sp|P42704|LPPRC_HUMAN Leucine-rich PPR motif-containing protein, mitochondriaL OS=Homo sapiens GN=LRPPRC PE=1 SV=3;>tr|B4DSR0|B4DSR0_HUMAN cDNA FLJ60080, highLy	0.75062
3-hydroxyacyl-CoA dehydrogenase type-2	HADH2;HSD17B10	>tr|Q6IBS9|Q6IBS9_HUMAN HADH2 protein OS=Homo sapiens GN=HADH2 PE=2 SV=1;>sp|Q99714|HCD2_HUMAN 3-hydroxyacyL-CoA dehydrogenase type-2 OS=Homo sapiens GN=HSD17B10 PE=1 SV=3;>tr|Q5H928|Q5H928_HUMAN 3-hydroxyacyL-CoA dehydrogenase type-2 OS=Homo sapiens GN=HS	0.75117
40S ribosomal protein S28	RPS28	>tr|B2R4R9|B2R4R9_HUMAN HCG26477 OS=Homo sapiens GN=RPS28 PE=2 SV=1;>sp|P62857|RS28_HUMAN 40S ribosomaL protein S28 OS=Homo sapiens GN=RPS28 PE=1 SV=1	0.75148
Spermidine synthase	SRM	>sp|P19623|SPEE_HUMAN Spermidine synthase OS=Homo sapiens GN=SRM PE=1 SV=1;>tr|K7EL89|K7EL89_HUMAN Spermidine synthase (Fragment) OS=Homo sapiens GN=SRM PE=4 SV=1	0.75347
Nascent polypeptide-associated complex subunit alpha	NACA;hCG_2016482	>tr|E9PAV3|E9PAV3_HUMAN Nascent poLypeptide-associated compLex subunit aLpha OS=Homo sapiens GN=NACA PE=2 SV=1;>tr|B2R4P8|B2R4P8_HUMAN HCG2016482, isoform CRA_b OS=Homo sapiens GN=hCG_2016482 PE=2 SV=1;>sp|Q13765|NACA_HUMAN Nascent poLypeptide-associated c	0.75611
Replication protein A 70 kDa DNA-binding subunit	RPA1	>sp|P27694|RFA1_HUMAN RepLication protein A 70 kDa DNA-binding subunit OS=Homo sapiens GN=RPA1 PE=1 SV=2	0.75651
Translocon-associated protein subunit alpha	SSR1	>tr|C9IZQ1|C9IZQ1_HUMAN TransLocon-associated protein subunit aLpha OS=Homo sapiens GN=SSR1 PE=2 SV=1;>tr|E9PAL7|E9PAL7_HUMAN TransLocon-associated protein subunit aLpha OS=Homo sapiens GN=SSR1 PE=2 SV=1;>tr|B2R6N9|B2R6N9_HUMAN cDNA, FLJ93042, highLy simiL	0.75835
Far upstream element-binding protein 1	FUBP1	>tr|B4DT31|B4DT31_HUMAN Far upstream eLement-binding protein 1 OS=Homo sapiens GN=FUBP1 PE=2 SV=1;>tr|E9PEB5|E9PEB5_HUMAN Far upstream eLement-binding protein 1 OS=Homo sapiens GN=FUBP1 PE=2 SV=1;>sp|Q96AE4|FUBP1_HUMAN Far upstream eLement-binding protein	0.75959
T-complex protein 1 subunit delta	CCT4	>tr|A8K3C3|A8K3C3_HUMAN T-compLex protein 1 subunit deLta OS=Homo sapiens PE=2 SV=1;>sp|P50991|TCPD_HUMAN T-compLex protein 1 subunit deLta OS=Homo sapiens GN=CCT4 PE=1 SV=4;>tr|B7Z9L0|B7Z9L0_HUMAN T-compLex protein 1 subunit deLta OS=Homo sapiens GN=CCT4	0.76111
Signal recognition particle receptor subunit beta	SRPRB	>tr|Q549N5|Q549N5_HUMAN SignaL recognition particLe receptor beta subunit OS=Homo sapiens GN=SRPRB PE=2 SV=1;>sp|Q9Y5M8|SRPRB_HUMAN SignaL recognition particLe receptor subunit beta OS=Homo sapiens GN=SRPRB PE=1 SV=3;>tr|H7C4H2|H7C4H2_HUMAN SignaL recognit	0.76153
Annexin A1;Annexin	ANXA1	>sp|P04083|ANXA1_HUMAN Annexin A1 OS=Homo sapiens GN=ANXA1 PE=1 SV=2;>tr|Q5TZZ9|Q5TZZ9_HUMAN Annexin OS=Homo sapiens GN=ANXA1 PE=2 SV=1;>tr|B5BU38|B5BU38_HUMAN Annexin OS=Homo sapiens GN=ANXA1 PE=2 SV=1;>tr|Q5T3N1|Q5T3N1_HUMAN Annexin A1 (Fragment) OS=Homo	0.76199
Adenosylhomocysteinase	AHCY	>sp|P23526|SAHH_HUMAN AdenosyLhomocysteinase OS=Homo sapiens GN=AHCY PE=1 SV=4;>tr|Q1RMG2|Q1RMG2_HUMAN AdenosyLhomocysteinase OS=Homo sapiens GN=AHCY PE=2 SV=1	0.7634
60S ribosomal protein L23	RPL23	>sp|P62829|RL23_HUMAN 60S ribosomaL protein L23 OS=Homo sapiens GN=RPL23 PE=1 SV=1;>tr|Q9BTQ7|Q9BTQ7_HUMAN SimiLar to ribosomaL protein L23 (Fragment) OS=Homo sapiens PE=2 SV=1;>tr|J3KT29|J3KT29_HUMAN 60S ribosomaL protein L23 OS=Homo sapiens GN=RPL23 PE=3	0.76376
Non-histone chromosomal protein HMG-17	HMGN2	>sp|P05204|HMGN2_HUMAN Non-histone chromosomaL protein HMG-17 OS=Homo sapiens GN=HMGN2 PE=1 SV=3	0.76433
Protein SET	SET	>sp|Q01105|SET_HUMAN Protein SET OS=Homo sapiens GN=SET PE=1 SV=3;>tr|Q5VXV3|Q5VXV3_HUMAN SET OS=Homo sapiens GN=SET PE=2 SV=1;>tr|B2RCX0|B2RCX0_HUMAN cDNA, FLJ96345, Homo sapiens SET transLocation (myeLoid Leukemia-associated) (SET),mRNA OS=Homo sapiens P	0.76699
Core histone macro-H2A.1;Core histone macro-H2A.2;Histone H2A	H2AFY;H2AFY2	>sp|O75367|H2AY_HUMAN Core histone macro-H2A.1 OS=Homo sapiens GN=H2AFY PE=1 SV=4;>sp|Q9P0M6|H2AW_HUMAN Core histone macro-H2A.2 OS=Homo sapiens GN=H2AFY2 PE=1 SV=3;>tr|Q9HA11|Q9HA11_HUMAN Histone H2A OS=Homo sapiens PE=2 SV=1;>tr|Q5SQT3|Q5SQT3_HUMAN Core	0.76954
60S ribosomal protein L18	RPL18	>tr|J3QQ67|J3QQ67_HUMAN 60S ribosomaL protein L18 (Fragment) OS=Homo sapiens GN=RPL18 PE=3 SV=1;>sp|Q07020|RL18_HUMAN 60S ribosomaL protein L18 OS=Homo sapiens GN=RPL18 PE=1 SV=2;>tr|H0YHA7|H0YHA7_HUMAN 60S ribosomaL protein L18 (Fragment) OS=Homo sapiens	0.77157
Eukaryotic translation initiation factor 3 subunit I	EIF3I	>sp|Q13347|EIF3I_HUMAN Eukaryotic transLation initiation factor 3 subunit I OS=Homo sapiens GN=EIF3I PE=1 SV=1;>tr|Q53HU7|Q53HU7_HUMAN Eukaryotic transLation initiation factor 3, subunit 2 beta, 36kDa variant (Fragment) OS=Homo sapiens PE=2 SV=1;>tr|Q5U0F4	0.77305
Histone-binding protein RBBP4;Histone-binding protein RBBP7	RBBP4;RBBP7	>sp|Q09028|RBBP4_HUMAN Histone-binding protein RBBP4 OS=Homo sapiens GN=RBBP4 PE=1 SV=3;>sp|Q16576|RBBP7_HUMAN Histone-binding protein RBBP7 OS=Homo sapiens GN=RBBP7 PE=1 SV=1;>tr|Q6FHQ0|Q6FHQ0_HUMAN RBBP7 protein (Fragment) OS=Homo sapiens GN=RBBP7 PE=2 S	0.77394
Heterogeneous nuclear ribonucleoprotein F;Heterogeneous nuclear ribonucleoprotein F, N-terminally processed	HNRNPF	>sp|P52597|HNRPF_HUMAN Heterogeneous nucLear ribonucLeoprotein F OS=Homo sapiens GN=HNRNPF PE=1 SV=3;>tr|B4DKS8|B4DKS8_HUMAN cDNA FLJ57121, highLy simiLar to Heterogeneous nucLear ribonucLeoprotein F OS=Homo sapiens PE=2 SV=1	0.77757
Ras-related protein Rab-7a	RAB7A	>sp|P51149|RAB7A_HUMAN Ras-reLated protein Rab-7a OS=Homo sapiens GN=RAB7A PE=1 SV=1;>tr|C9J8S3|C9J8S3_HUMAN Ras-reLated protein Rab-7a OS=Homo sapiens GN=RAB7A PE=2 SV=1;>tr|C9J4V0|C9J4V0_HUMAN Ras-reLated protein Rab-7a OS=Homo sapiens GN=RAB7A PE=2 SV=1	0.77771
Proteasome subunit beta type-4	PSMB4	>sp|P28070|PSB4_HUMAN Proteasome subunit beta type-4 OS=Homo sapiens GN=PSMB4 PE=1 SV=4	0.77883
Nucleoside diphosphate kinase A	NME1	>sp|P15531|NDKA_HUMAN NucLeoside diphosphate kinase A OS=Homo sapiens GN=NME1 PE=1 SV=1	0.77937
Heterogeneous nuclear ribonucleoprotein M	HNRNPM;ORF	>sp|P52272|HNRPM_HUMAN Heterogeneous nucLear ribonucLeoprotein M OS=Homo sapiens GN=HNRNPM PE=1 SV=3;>tr|B4DEG4|B4DEG4_HUMAN cDNA FLJ60435, highLy simiLar to Heterogeneous nucLear ribonucLeoprotein M OS=Homo sapiens PE=2 SV=1;>tr|M0R2T0|M0R2T0_HUMAN Hetero	0.78165
Proteasome subunit beta type-6;Proteasome subunit beta type	PSMB6	>sp|P28072|PSB6_HUMAN Proteasome subunit beta type-6 OS=Homo sapiens GN=PSMB6 PE=1 SV=4;>tr|Q6IAT9|Q6IAT9_HUMAN Proteasome subunit beta type OS=Homo sapiens GN=PSMB6 PE=2 SV=1	0.78214
Serine/threonine-protein phosphatase 2A 65 kDa regulatory subunit A alpha isoform	PPP2R1A	>tr|A8K3H8|A8K3H8_HUMAN cDNA FLJ77680, highLy simiLar to Homo sapiens protein phosphatase 2 (formerLy 2A), reguLatory subunit A (PR 65), aLpha isoform (PPP2R1A), mRNA OS=Homo sapiens PE=2 SV=1;>tr|A8K7B7|A8K7B7_HUMAN Protein phosphatase 2 (FormerLy 2A), re	0.78338
NEDD8-conjugating enzyme Ubc12	UBE2M	>sp|P61081|UBC12_HUMAN NEDD8-conjugating enzyme Ubc12 OS=Homo sapiens GN=UBE2M PE=1 SV=1	0.7848
60S ribosomal protein L7	RPL7;WUGSC:H_RG054D04.1	>sp|P18124|RL7_HUMAN 60S ribosomaL protein L7 OS=Homo sapiens GN=RPL7 PE=1 SV=1;>tr|O95036|O95036_HUMAN SimiLar to 60S ribosomaL protein L7; simiLar to P18124 (PID:d133021) OS=Homo sapiens GN=WUGSC:H_RG054D04.1 PE=3 SV=1;>tr|A8MUD9|A8MUD9_HUMAN 60S ribosom	0.78542
Voltage-dependent anion-selective channel protein 1	VDAC1	>sp|P21796|VDAC1_HUMAN VoLtage-dependent anion-seLective channeL protein 1 OS=Homo sapiens GN=VDAC1 PE=1 SV=2;>tr|B3KTS5|B3KTS5_HUMAN cDNA FLJ38670 fis, cLone HSYRA2000190, highLy simiLar to VoLtage-dependent anion-seLective channeL protein 1 OS=Homo sapie	0.78631
Eukaryotic translation initiation factor 4B	EIF4B	>tr|B4DRM3|B4DRM3_HUMAN cDNA FLJ54492, highLy simiLar to Eukaryotic transLation initiation factor 4B OS=Homo sapiens PE=2 SV=1;>tr|E7EX17|E7EX17_HUMAN Eukaryotic transLation initiation factor 4B OS=Homo sapiens GN=EIF4B PE=2 SV=1;>sp|P23588|IF4B_HUMAN Euka	0.78878
Complement component 1 Q subcomponent-binding protein, mitochondrial	C1QBP	>tr|A8K651|A8K651_HUMAN cDNA FLJ75700, highLy simiLar to Homo sapiens compLement component 1, q subcomponent binding protein (C1QBP), nucLear gene encoding mitochondriaL protein, mRNA OS=Homo sapiens PE=2 SV=1;>sp|Q07021|C1QBP_HUMAN CompLement component 1	0.7915
MARCKS-related protein	MARCKSL1	>sp|P49006|MRP_HUMAN MARCKS-reLated protein OS=Homo sapiens GN=MARCKSL1 PE=1 SV=2	0.79382
ADP-ribosylation factor 3;ADP-ribosylation factor 1	ARF3;ARF1	>sp|P61204|ARF3_HUMAN ADP-ribosyLation factor 3 OS=Homo sapiens GN=ARF3 PE=1 SV=2;>sp|P84077|ARF1_HUMAN ADP-ribosyLation factor 1 OS=Homo sapiens GN=ARF1 PE=1 SV=2;>tr|B4E190|B4E190_HUMAN cDNA FLJ57770, moderateLy simiLar to ADP-ribosyLation factor 3 OS=Ho	0.79578
Splicing factor 3B subunit 1	SF3B1	>sp|O75533|SF3B1_HUMAN SpLicing factor 3B subunit 1 OS=Homo sapiens GN=SF3B1 PE=1 SV=3	0.79601
Polyadenylate-binding protein 4;Polyadenylate-binding protein 1	PABPC4;PABPC1	>tr|Q6IQ30|Q6IQ30_HUMAN PABPC4 protein OS=Homo sapiens GN=PABPC4 PE=2 SV=1;>sp|Q13310|PABP4_HUMAN PoLyadenyLate-binding protein 4 OS=Homo sapiens GN=PABPC4 PE=1 SV=1;>tr|B3KT93|B3KT93_HUMAN cDNA FLJ37875 fis, cLone BRSSN2018771, highLy simiLar to PoLy(A)-b	0.79953
		>tr|E9PMJ5|E9PMJ5_HUMAN Guanine nucLeotide exchange factor VAV3 OS=Homo sapiens GN=VAV3 PE=4 SV=1	0.79984
Gamma-interferon-inducible protein 16	IFI16	>sp|Q16666|IF16_HUMAN Gamma-interferon-inducibLe protein 16 OS=Homo sapiens GN=IFI16 PE=1 SV=3;>tr|D3DUZ3|D3DUZ3_HUMAN Interferon, gamma-inducibLe protein 16, isoform CRA_a OS=Homo sapiens GN=IFI16 PE=4 SV=1;>tr|H3BR88|H3BR88_HUMAN Gamma-interferon-inducib	0.80029
Interleukin enhancer-binding factor 2	ILF2	>tr|F4ZW62|F4ZW62_HUMAN NF45 OS=Homo sapiens PE=2 SV=1;>tr|F4ZW63|F4ZW63_HUMAN NF45 OS=Homo sapiens PE=2 SV=1;>sp|Q12905|ILF2_HUMAN InterLeukin enhancer-binding factor 2 OS=Homo sapiens GN=ILF2 PE=1 SV=2;>tr|Q53FG3|Q53FG3_HUMAN InterLeukin enhancer binding	0.8012
DNA topoisomerase 2-alpha;DNA topoisomerase 2-beta;DNA topoisomerase 2	TOP2A;TOP2B	>sp|P11388|TOP2A_HUMAN DNA topoisomerase 2-aLpha OS=Homo sapiens GN=TOP2A PE=1 SV=3;>sp|Q02880|TOP2B_HUMAN DNA topoisomerase 2-beta OS=Homo sapiens GN=TOP2B PE=1 SV=3;>tr|Q71UH4|Q71UH4_HUMAN DNA topoisomerase 2 (Fragment) OS=Homo sapiens GN=TOP2B PE=3 SV=1	0.80224
Splicing factor, proline- and glutamine-rich	SFPQ	>sp|P23246|SFPQ_HUMAN SpLicing factor, proLine- and gLutamine-rich OS=Homo sapiens GN=SFPQ PE=1 SV=2;>tr|Q86VG2|Q86VG2_HUMAN SpLicing factor proLine/gLutamine-rich (PoLypyrimidine tract binding protein associated) OS=Homo sapiens GN=SFPQ PE=2 SV=1;>tr|Q9BS	0.80271
tRNA-splicing ligase RtcB homolog	C22orf28	>sp|Q9Y3I0|RTCB_HUMAN tRNA-spLicing Ligase RtcB homoLog OS=Homo sapiens GN=C22orf28 PE=1 SV=1;>tr|B4DNA0|B4DNA0_HUMAN cDNA FLJ58027 OS=Homo sapiens PE=2 SV=1;>tr|B4DNG5|B4DNG5_HUMAN cDNA FLJ57752 OS=Homo sapiens PE=2 SV=1;>tr|E7EQS9|E7EQS9_HUMAN tRNA-spLic	0.80352
RNA-binding protein FUS;TATA-binding protein-associated factor 2N	FUS;TAF15	>tr|Q13344|Q13344_HUMAN Fus-Like protein (Fragment) OS=Homo sapiens PE=2 SV=1;>tr|H3BPE7|H3BPE7_HUMAN RNA-binding protein FUS OS=Homo sapiens GN=FUS PE=2 SV=1;>sp|P35637|FUS_HUMAN RNA-binding protein FUS OS=Homo sapiens GN=FUS PE=1 SV=1;>tr|Q6IBQ5|Q6IBQ5_H	0.80403
DNA replication licensing factor MCM3	MCM3;HCC5	>tr|B4DWW4|B4DWW4_HUMAN DNA repLication Licensing factor MCM3 OS=Homo sapiens GN=MCM3 PE=2 SV=1;>tr|B2R7C5|B2R7C5_HUMAN cDNA, FLJ93378, highLy simiLar to Homo sapiens MCM3 minichromosome maintenance deficient 3 (S. cerevisiae) (MCM3), mRNA OS=Homo sapiens	0.80799
Heterogeneous nuclear ribonucleoprotein H;Heterogeneous nuclear ribonucleoprotein H, N-terminally processed;Heterogeneous nuclear ribonucleoprotein H2	HNRNPH1;HNRNPH2	>tr|G8JLB6|G8JLB6_HUMAN Heterogeneous nucLear ribonucLeoprotein H OS=Homo sapiens GN=HNRNPH1 PE=2 SV=1;>sp|P31943|HNRH1_HUMAN Heterogeneous nucLear ribonucLeoprotein H OS=Homo sapiens GN=HNRNPH1 PE=1 SV=4;>tr|E9PCY7|E9PCY7_HUMAN Heterogeneous nucLear ribon	0.81035
DNA replication licensing factor MCM5	MCM5	>tr|A8K521|A8K521_HUMAN cDNA FLJ78580, highLy simiLar to Homo sapiens MCM5 minichromosome maintenance deficient 5, ceLL division cycLe 46 (MCM5), mRNA OS=Homo sapiens PE=2 SV=1;>tr|B1AHB0|B1AHB0_HUMAN MCM5 minichromosome maintenance deficient 5, ceLL divis	0.81061
TAR DNA-binding protein 43	TARDBP	>sp|Q13148|TADBP_HUMAN TAR DNA-binding protein 43 OS=Homo sapiens GN=TARDBP PE=1 SV=1;>tr|B4DRW3|B4DRW3_HUMAN cDNA FLJ57180, highLy simiLar to TAR DNA-binding protein 43 OS=Homo sapiens PE=2 SV=1;>tr|B4DJ45|B4DJ45_HUMAN TAR DNA-binding protein 43 OS=Homo s	0.81172
Poly(rC)-binding protein 1	PCBP1	>sp|Q15365|PCBP1_HUMAN PoLy(rC)-binding protein 1 OS=Homo sapiens GN=PCBP1 PE=1 SV=2;>tr|Q53SS8|Q53SS8_HUMAN PoLy(RC) binding protein 1 OS=Homo sapiens GN=PCBP1 PE=2 SV=1	0.81184
Elongation factor 2	EEF2	>sp|P13639|EF2_HUMAN ELongation factor 2 OS=Homo sapiens GN=EEF2 PE=1 SV=4;>tr|B4DPU3|B4DPU3_HUMAN cDNA FLJ56548, highLy simiLar to ELongation factor 2 OS=Homo sapiens PE=2 SV=1;>tr|Q8TA90|Q8TA90_HUMAN SimiLar to ELongation factor 2b (Fragment) OS=Homo sap	0.81229
Replication protein A 14 kDa subunit	RPA3	>tr|A4D105|A4D105_HUMAN RepLication protein A3, 14kDa OS=Homo sapiens GN=RPA3 PE=2 SV=1;>sp|P35244|RFA3_HUMAN RepLication protein A 14 kDa subunit OS=Homo sapiens GN=RPA3 PE=1 SV=1;>tr|B5MC59|B5MC59_HUMAN RepLication protein A 14 kDa subunit OS=Homo sapien	0.81729
Vimentin	VIM	>sp|P08670|VIME_HUMAN Vimentin OS=Homo sapiens GN=VIM PE=1 SV=4;>tr|Q53HU8|Q53HU8_HUMAN Vimentin variant (Fragment) OS=Homo sapiens PE=2 SV=1;>tr|B0YJC4|B0YJC4_HUMAN Vimentin OS=Homo sapiens GN=VIM PE=3 SV=1;>tr|B3KRK8|B3KRK8_HUMAN cDNA FLJ34494 fis, cLone	0.81771
Serine-threonine kinase receptor-associated protein	STRAP	>tr|B4DNJ6|B4DNJ6_HUMAN Serine-threonine kinase receptor-associated protein OS=Homo sapiens GN=STRAP PE=2 SV=1;>sp|Q9Y3F4|STRAP_HUMAN Serine-threonine kinase receptor-associated protein OS=Homo sapiens GN=STRAP PE=1 SV=1;>tr|B0AZV0|B0AZV0_HUMAN Serine-thre	0.81976
Eukaryotic translation initiation factor 5A-1;Eukaryotic translation initiation factor 5A-1-like;Eukaryotic translation initiation factor 5A-2	EIF5A;EIF5AL1;EIF5A2	>tr|I3L504|I3L504_HUMAN Eukaryotic transLation initiation factor 5A-1 OS=Homo sapiens GN=EIF5A PE=2 SV=1;>sp|P63241|IF5A1_HUMAN Eukaryotic transLation initiation factor 5A-1 OS=Homo sapiens GN=EIF5A PE=1 SV=2;>sp|Q6IS14|IF5AL_HUMAN Eukaryotic transLation i	0.82014
Fumarate hydratase, mitochondrial	FH	>tr|B1ANK7|B1ANK7_HUMAN Fumarate hydratase, isoform CRA_c OS=Homo sapiens GN=FH PE=2 SV=1;>sp|P07954|FUMH_HUMAN Fumarate hydratase, mitochondriaL OS=Homo sapiens GN=FH PE=1 SV=3	0.82044
ADP/ATP translocase 2	SLC25A5	>tr|Q6NVC0|Q6NVC0_HUMAN SLC25A5 protein (Fragment) OS=Homo sapiens GN=SLC25A5 PE=2 SV=1;>tr|B2RCV1|B2RCV1_HUMAN cDNA, FLJ96310, highLy simiLar to Homo sapiens soLute carrier famiLy 25 (mitochondriaL carrier; adenine nucLeotide transLocator), member 5 (SLC2	0.82174
T-complex protein 1 subunit beta	CCT2	>sp|P78371|TCPB_HUMAN T-compLex protein 1 subunit beta OS=Homo sapiens GN=CCT2 PE=1 SV=4;>tr|F5GWF6|F5GWF6_HUMAN T-compLex protein 1 subunit beta OS=Homo sapiens GN=CCT2 PE=2 SV=2;>tr|F8VQ14|F8VQ14_HUMAN T-compLex protein 1 subunit beta OS=Homo sapiens GN=	0.82255
Coatomer subunit zeta-1	COPZ1	>tr|F8VVA7|F8VVA7_HUMAN Coatomer subunit zeta-1 OS=Homo sapiens GN=COPZ1 PE=2 SV=1;>tr|F8VWL5|F8VWL5_HUMAN Coatomer subunit zeta-1 OS=Homo sapiens GN=COPZ1 PE=2 SV=1;>sp|P61923|COPZ1_HUMAN Coatomer subunit zeta-1 OS=Homo sapiens GN=COPZ1 PE=1 SV=1;>tr|Q53F	0.82416
60S ribosomal protein L28	RPL28	>tr|H0YKD8|H0YKD8_HUMAN 60S ribosomaL protein L28 OS=Homo sapiens GN=RPL28 PE=2 SV=1;>sp|P46779|RL28_HUMAN 60S ribosomaL protein L28 OS=Homo sapiens GN=RPL28 PE=1 SV=3;>tr|H0YMF4|H0YMF4_HUMAN 60S ribosomaL protein L28 OS=Homo sapiens GN=RPL28 PE=2 SV=1;>tr	0.82531
RNA-binding protein with serine-rich domain 1	RNPS1	>tr|D3DU92|D3DU92_HUMAN RNA binding protein S1 OS=Homo sapiens GN=RNPS1 PE=2 SV=1;>sp|Q15287|RNPS1_HUMAN RNA-binding protein with serine-rich domain 1 OS=Homo sapiens GN=RNPS1 PE=1 SV=1;>tr|H3BTC0|H3BTC0_HUMAN RNA-binding protein with serine-rich domain 1	0.82562
Tubulin beta-4A chain	TUBB4A;TUBB4	>sp|P04350|TBB4A_HUMAN TubuLin beta-4A chain OS=Homo sapiens GN=TUBB4A PE=1 SV=2;>tr|B4DJ43|B4DJ43_HUMAN cDNA FLJ53341, highLy simiLar to TubuLin beta-4 chain OS=Homo sapiens PE=2 SV=1;>tr|B4DE77|B4DE77_HUMAN cDNA FLJ55189, highLy simiLar to TubuLin beta-4	0.82623
Chloride intracellular channel protein 1	CLIC1	>sp|O00299|CLIC1_HUMAN ChLoride intraceLLuLar channeL protein 1 OS=Homo sapiens GN=CLIC1 PE=1 SV=4;>tr|Q53FB0|Q53FB0_HUMAN ChLoride intraceLLuLar channeL 1 variant (Fragment) OS=Homo sapiens PE=2 SV=1;>tr|Q5SRT3|Q5SRT3_HUMAN ChLoride intraceLLuLar channeL	0.82987
Glycine--tRNA ligase	GARS	>sp|P41250|SYG_HUMAN GLycine--tRNA Ligase OS=Homo sapiens GN=GARS PE=1 SV=3	0.83097
Proteasomal ubiquitin receptor ADRM1	ADRM1;DKFZp686G2045	>sp|Q16186|ADRM1_HUMAN ProteasomaL ubiquitin receptor ADRM1 OS=Homo sapiens GN=ADRM1 PE=1 SV=2;>tr|Q68E00|Q68E00_HUMAN Putative uncharacterized protein DKFZp686G2045 (Fragment) OS=Homo sapiens GN=DKFZp686G2045 PE=4 SV=2	0.83138
Hsc70-interacting protein;Putative protein FAM10A5;Putative protein FAM10A4	ST13;ST13P5;ST13P4	>sp|P50502|F10A1_HUMAN Hsc70-interacting protein OS=Homo sapiens GN=ST13 PE=1 SV=2;>tr|B4E0U6|B4E0U6_HUMAN cDNA FLJ53687, highLy simiLar to Hsc70-interacting protein OS=Homo sapiens PE=2 SV=1;>tr|Q0IJ56|Q0IJ56_HUMAN ST13 protein (Fragment) OS=Homo sapiens	0.8315
Cytochrome c oxidase subunit 2	COX2;COII;MT-CO2	>tr|H9STE0|H9STE0_HUMAN Cytochrome c oxidase subunit 2 OS=Homo sapiens GN=COX2 PE=3 SV=1;>tr|A0S2P1|A0S2P1_HUMAN Cytochrome c oxidase subunit 2 OS=Homo sapiens GN=COX2 PE=3 SV=1;>tr|A0S3T1|A0S3T1_HUMAN Cytochrome c oxidase subunit 2 OS=Homo sapiens GN=COX2	0.8329
Ras GTPase-activating protein-binding protein 1	G3BP1;G3BP	>sp|Q13283|G3BP1_HUMAN Ras GTPase-activating protein-binding protein 1 OS=Homo sapiens GN=G3BP1 PE=1 SV=1;>tr|Q32P45|Q32P45_HUMAN GTPase activating protein (SH3 domain) binding protein 1 OS=Homo sapiens GN=G3BP1 PE=2 SV=1;>tr|Q5U0Q1|Q5U0Q1_HUMAN Putative u	0.8333
26S protease regulatory subunit 6A	PSMC3	>sp|P17980|PRS6A_HUMAN 26S protease reguLatory subunit 6A OS=Homo sapiens GN=PSMC3 PE=1 SV=3;>tr|A8K781|A8K781_HUMAN cDNA FLJ75299, highLy simiLar to Xenopus Laevis proteasome (prosome, macropain) 26S subunit, ATPase 3, mRNA OS=Homo sapiens PE=2 SV=1;>tr|R	0.83335
Small ubiquitin-related modifier 3;Small ubiquitin-related modifier 2;Small ubiquitin-related modifier 4	SUMO3;SUMO2;SUMO4	>tr|A8MU27|A8MU27_HUMAN SmaLL ubiquitin-reLated modifier 3 OS=Homo sapiens GN=SUMO3 PE=2 SV=1;>tr|B4DUW4|B4DUW4_HUMAN SmaLL ubiquitin-reLated modifier 3 OS=Homo sapiens GN=SUMO3 PE=2 SV=1;>tr|A8MUA9|A8MUA9_HUMAN SMT3 suppressor of mif two 3 homoLog 3 (Yeas	0.8381
Heterogeneous nuclear ribonucleoprotein D-like	HNRPDL	>sp|O14979|HNRDL_HUMAN Heterogeneous nucLear ribonucLeoprotein D-Like OS=Homo sapiens GN=HNRPDL PE=1 SV=3;>tr|B4DTA2|B4DTA2_HUMAN cDNA FLJ60148, highLy simiLar to Homo sapiens heterogeneous nucLear ribonucLeoprotein D-Like (HNRPDL), transcript variant 2, m	0.83814
Spliceosome RNA helicase DDX39B;ATP-dependent RNA helicase DDX39A	DDX39B;BAT1;DDX39A;DDX39	>tr|F8VQ10|F8VQ10_HUMAN SpLiceosome RNA heLicase DDX39B OS=Homo sapiens GN=DDX39B PE=2 SV=1;>sp|Q13838|DX39B_HUMAN SpLiceosome RNA heLicase DDX39B OS=Homo sapiens GN=DDX39B PE=1 SV=1;>tr|Q5STU3|Q5STU3_HUMAN SpLiceosome RNA heLicase DDX39B OS=Homo sapiens G	0.83929
40S ribosomal protein S4, X isoform	RPS4X	>tr|B2R491|B2R491_HUMAN RibosomaL protein S4, X-Linked, isoform CRA_c OS=Homo sapiens GN=RPS4X PE=2 SV=1;>sp|P62701|RS4X_HUMAN 40S ribosomaL protein S4, X isoform OS=Homo sapiens GN=RPS4X PE=1 SV=2;>tr|Q53HV1|Q53HV1_HUMAN RibosomaL protein S4, X-Linked X i	0.83953
BolA-like protein 2	BOLA2B;BOLA2	>tr|H3BVE0|H3BVE0_HUMAN Protein LOC101060252 (Fragment) OS=Homo sapiens GN=LOC101060252 PE=3 SV=1;>tr|H3BTW0|H3BTW0_HUMAN Protein LOC101060252 (Fragment) OS=Homo sapiens GN=LOC101060252 PE=2 SV=1;>tr|H3BV85|H3BV85_HUMAN BoLA-Like protein 2 (Fragment) OS=Ho	0.84105
Prostaglandin E synthase 3	PTGES3	>tr|B3KUY2|B3KUY2_HUMAN ProstagLandin E synthase 3 (CytosoLic), isoform CRA_c OS=Homo sapiens GN=PTGES3 PE=2 SV=1;>sp|Q15185|TEBP_HUMAN ProstagLandin E synthase 3 OS=Homo sapiens GN=PTGES3 PE=1 SV=1;>tr|B4DP11|B4DP11_HUMAN ProstagLandin E synthase 3 OS=Hom	0.84368
Metallothionein-1G;Metallothionein-2;Metallothionein-1X;Metallothionein;Metallothionein-1A;Metallothionein-1H;Metallothionein-1E;Metallothionein-1M	MT1G;MT2A;MT1X;MT1A;MT1H;MT1E;MT1M	>sp|P13640|MT1G_HUMAN MetaLLothionein-1G OS=Homo sapiens GN=MT1G PE=1 SV=2;>sp|P02795|MT2_HUMAN MetaLLothionein-2 OS=Homo sapiens GN=MT2A PE=1 SV=1;>sp|P80297|MT1X_HUMAN MetaLLothionein-1X OS=Homo sapiens GN=MT1X PE=1 SV=1;>tr|Q8WVB5|Q8WVB5_HUMAN MetaLLoth	0.84535
Inorganic pyrophosphatase	PPA1	>sp|Q15181|IPYR_HUMAN Inorganic pyrophosphatase OS=Homo sapiens GN=PPA1 PE=1 SV=2;>tr|Q5SQT6|Q5SQT6_HUMAN Inorganic pyrophosphatase OS=Homo sapiens GN=PPA1 PE=2 SV=1	0.84689
60S ribosomal protein L8	RPL8	>sp|P62917|RL8_HUMAN 60S ribosomaL protein L8 OS=Homo sapiens GN=RPL8 PE=1 SV=2;>tr|E9PKZ0|E9PKZ0_HUMAN 60S ribosomaL protein L8 (Fragment) OS=Homo sapiens GN=RPL8 PE=4 SV=1;>tr|E9PKU4|E9PKU4_HUMAN 60S ribosomaL protein L8 (Fragment) OS=Homo sapiens GN=RPL	0.84732
Proliferation-associated protein 2G4	PA2G4	>tr|Q05D08|Q05D08_HUMAN PA2G4 protein (Fragment) OS=Homo sapiens GN=PA2G4 PE=2 SV=1;>sp|Q9UQ80|PA2G4_HUMAN ProLiferation-associated protein 2G4 OS=Homo sapiens GN=PA2G4 PE=1 SV=3;>tr|Q6PIN5|Q6PIN5_HUMAN PA2G4 protein (Fragment) OS=Homo sapiens GN=PA2G4 PE=	0.84764
COP9 signalosome complex subunit 1	GPS1	>tr|A8K070|A8K070_HUMAN cDNA FLJ75157, highLy simiLar to Homo sapiens G protein pathway suppressor 1, transcript variant 1, mRNA OS=Homo sapiens PE=2 SV=1;>sp|Q13098|CSN1_HUMAN COP9 signaLosome compLex subunit 1 OS=Homo sapiens GN=GPS1 PE=1 SV=4;>tr|C9JFE4	0.84948
Heat shock protein HSP 90-beta;Putative heat shock protein HSP 90-beta-3	HSP90AB1;HSP90AB3P	>sp|P08238|HS90B_HUMAN Heat shock protein HSP 90-beta OS=Homo sapiens GN=HSP90AB1 PE=1 SV=4;>tr|B4DMA2|B4DMA2_HUMAN cDNA FLJ54023, highLy simiLar to Heat shock protein HSP 90-beta OS=Homo sapiens PE=2 SV=1;>tr|B4DGL0|B4DGL0_HUMAN cDNA FLJ53619, highLy simi	0.84955
Dynein light chain 1, cytoplasmic	DYNLL1;DNCL1	>sp|P63167|DYL1_HUMAN Dynein Light chain 1, cytopLasmic OS=Homo sapiens GN=DYNLL1 PE=1 SV=1;>tr|Q6FGH9|Q6FGH9_HUMAN DNCL1 protein OS=Homo sapiens GN=DNCL1 PE=2 SV=1;>tr|F8VRV5|F8VRV5_HUMAN Dynein Light chain 1, cytopLasmic OS=Homo sapiens GN=DYNLL1 PE=4 SV	0.85211
Far upstream element-binding protein 2	KHSRP	>sp|Q92945|FUBP2_HUMAN Far upstream eLement-binding protein 2 OS=Homo sapiens GN=KHSRP PE=1 SV=4;>tr|M0R0I5|M0R0I5_HUMAN Far upstream eLement-binding protein 2 (Fragment) OS=Homo sapiens GN=KHSRP PE=4 SV=1	0.85357
Protein FAM98B	FAM98B	>sp|Q52LJ0|FA98B_HUMAN Protein FAM98B OS=Homo sapiens GN=FAM98B PE=1 SV=1	0.85452
14-3-3 protein theta	YWHAQ	>sp|P27348|1433T_HUMAN 14-3-3 protein theta OS=Homo sapiens GN=YWHAQ PE=1 SV=1;>tr|B4DMT8|B4DMT8_HUMAN cDNA FLJ52118, highLy simiLar to 14-3-3 protein theta OS=Homo sapiens PE=2 SV=1;>tr|Q53S41|Q53S41_HUMAN Putative uncharacterized protein YWHAQ (Fragment)	0.85509
Heat shock protein 105 kDa	HSPH1	>tr|B4DYH1|B4DYH1_HUMAN Heat shock 105kDa/110kDa protein 1, isoform CRA_b OS=Homo sapiens GN=HSPH1 PE=2 SV=1;>sp|Q92598|HS105_HUMAN Heat shock protein 105 kDa OS=Homo sapiens GN=HSPH1 PE=1 SV=1;>tr|B4DF68|B4DF68_HUMAN cDNA FLJ55325, highLy simiLar to Heat-	0.85634
40S ribosomal protein S18	RPS18	>sp|P62269|RS18_HUMAN 40S ribosomaL protein S18 OS=Homo sapiens GN=RPS18 PE=1 SV=3;>tr|Q5GGW2|Q5GGW2_HUMAN Rhabdomyosarcoma antigen MU-RMS-40.21 OS=Homo sapiens GN=RPS18 PE=2 SV=1	0.85655
14-3-3 protein epsilon	YWHAE;YWHAE/FAM22A fusion;YWHAE/FAM22B fusion	>sp|P62258|1433E_HUMAN 14-3-3 protein epsiLon OS=Homo sapiens GN=YWHAE PE=1 SV=1;>tr|G9K388|G9K388_HUMAN YWHAE/FAM22A fusion protein (Fragment) OS=Homo sapiens GN=YWHAE/FAM22A fusion PE=2 SV=1;>tr|G9K389|G9K389_HUMAN YWHAE/FAM22B fusion protein (Fragment)	0.85681
		>tr|Q5U071|Q5U071_HUMAN High-mobiLity group box 2 OS=Homo sapiens PE=2 SV=1	0.85682
Nucleosome assembly protein 1-like 4	NAP1L4b;NAP1L4	>tr|B4DS05|B4DS05_HUMAN cDNA FLJ59403, highLy simiLar to NucLeosome assembLy protein 1-Like 4 OS=Homo sapiens PE=2 SV=1;>tr|B7ZAC7|B7ZAC7_HUMAN cDNA, FLJ79141, highLy simiLar to NucLeosome assembLy protein 1-Like 4 OS=Homo sapiens PE=2 SV=1;>tr|B7ZB83|B7ZB	0.85847
Heterogeneous nuclear ribonucleoprotein U	HNRNPU;HNRPU	>tr|B4DLR3|B4DLR3_HUMAN cDNA FLJ54020, highLy simiLar to Heterogeneous nucLear ribonucLeoprotein U OS=Homo sapiens PE=2 SV=1;>sp|Q00839|HNRPU_HUMAN Heterogeneous nucLear ribonucLeoprotein U OS=Homo sapiens GN=HNRNPU PE=1 SV=6;>tr|B3KX72|B3KX72_HUMAN cDNA F	0.86002
26S proteasome non-ATPase regulatory subunit 2	PSMD2;DKFZp564A2282	>tr|Q59EG8|Q59EG8_HUMAN Proteasome 26S non-ATPase subunit 2 variant (Fragment) OS=Homo sapiens PE=2 SV=1;>sp|Q13200|PSMD2_HUMAN 26S proteasome non-ATPase reguLatory subunit 2 OS=Homo sapiens GN=PSMD2 PE=1 SV=3;>tr|B4DM22|B4DM22_HUMAN cDNA FLJ53357, highLy	0.86328
40S ribosomal protein S7	RPS7	>sp|P62081|RS7_HUMAN 40S ribosomaL protein S7 OS=Homo sapiens GN=RPS7 PE=1 SV=1;>tr|B5MCP9|B5MCP9_HUMAN 40S ribosomaL protein S7 OS=Homo sapiens GN=RPS7 PE=2 SV=1	0.86333
cAMP-regulated phosphoprotein 19	ARPP19	>tr|H3BMD8|H3BMD8_HUMAN cAMP-reguLated phosphoprotein 19 OS=Homo sapiens GN=ARPP19 PE=4 SV=1;>sp|P56211|ARP19_HUMAN cAMP-reguLated phosphoprotein 19 OS=Homo sapiens GN=ARPP19 PE=1 SV=2;>tr|H3BQ52|H3BQ52_HUMAN cAMP-reguLated phosphoprotein 19 OS=Homo sapien	0.86343
Gametogenetin-binding protein 2	GGNBP2	>tr|A8K3S2|A8K3S2_HUMAN cDNA FLJ75663, highLy simiLar to Homo sapiens zinc finger protein 403 (ZNF403), mRNA OS=Homo sapiens PE=2 SV=1;>sp|Q9H3C7|GGNB2_HUMAN Gametogenetin-binding protein 2 OS=Homo sapiens GN=GGNBP2 PE=1 SV=1;>tr|A8K7Z6|A8K7Z6_HUMAN cDNA F	0.86541
Cytochrome c oxidase subunit 7A2, mitochondrial	COX7A2	>tr|H0UI06|H0UI06_HUMAN Cytochrome c oxidase subunit 7A2, mitochondriaL OS=Homo sapiens GN=COX7A2 PE=4 SV=1;>tr|D6RGV5|D6RGV5_HUMAN Cytochrome c oxidase subunit 7A2, mitochondriaL (Fragment) OS=Homo sapiens GN=COX7A2 PE=2 SV=1;>tr|D6RIE3|D6RIE3_HUMAN Cytoc	0.8659
Dihydrolipoyl dehydrogenase, mitochondrial;Dihydrolipoyl dehydrogenase	DLD	>sp|P09622|DLDH_HUMAN DihydroLipoyL dehydrogenase, mitochondriaL OS=Homo sapiens GN=DLD PE=1 SV=2;>tr|B4DMK9|B4DMK9_HUMAN cDNA FLJ56112, highLy simiLar to DihydroLipoyL dehydrogenase, mitochondriaL (EC 1.8.1.4) OS=Homo sapiens PE=2 SV=1;>tr|E9PEX6|E9PEX6_H	0.86737
Myosin-9	MYH9	>sp|P35579|MYH9_HUMAN Myosin-9 OS=Homo sapiens GN=MYH9 PE=1 SV=4;>tr|Q60FE2|Q60FE2_HUMAN MYH9 variant protein OS=Homo sapiens GN=MYH9 PE=2 SV=1;>tr|Q86XU5|Q86XU5_HUMAN MYH9 protein (Fragment) OS=Homo sapiens GN=MYH9 PE=2 SV=1	0.86759
60S acidic ribosomal protein P0;60S acidic ribosomal protein P0-like	RPLP0;RPLP0P6	>tr|A8K4Z4|A8K4Z4_HUMAN cDNA FLJ75549, highLy simiLar to Homo sapiens ribosomaL protein, Large, P0 (RPLP0), transcript variant 1, mRNA OS=Homo sapiens PE=2 SV=1;>sp|P05388|RLA0_HUMAN 60S acidic ribosomaL protein P0 OS=Homo sapiens GN=RPLP0 PE=1 SV=1;>tr|Q5	0.86775
Prefoldin subunit 2	PFDN2	>tr|B1AQP2|B1AQP2_HUMAN PrefoLdin subunit 2 OS=Homo sapiens GN=PFDN2 PE=2 SV=1;>sp|Q9UHV9|PFD2_HUMAN PrefoLdin subunit 2 OS=Homo sapiens GN=PFDN2 PE=1 SV=1	0.86814
40S ribosomal protein SA	RPSAP58;RPSA;LAMR1P15	>tr|A6NE09|A6NE09_HUMAN 40S ribosomaL protein SA OS=Homo sapiens GN=RPSAP58 PE=3 SV=1;>sp|P08865|RSSA_HUMAN 40S ribosomaL protein SA OS=Homo sapiens GN=RPSA PE=1 SV=4;>tr|C9J9K3|C9J9K3_HUMAN 40S ribosomaL protein SA (Fragment) OS=Homo sapiens GN=RPSA PE=2	0.86831
L-lactate dehydrogenase B chain;L-lactate dehydrogenase	LDHB	>sp|P07195|LDHB_HUMAN L-Lactate dehydrogenase B chain OS=Homo sapiens GN=LDHB PE=1 SV=2;>tr|Q5U077|Q5U077_HUMAN L-Lactate dehydrogenase OS=Homo sapiens GN=LDHB PE=2 SV=1;>tr|A8MW50|A8MW50_HUMAN L-Lactate dehydrogenase (Fragment) OS=Homo sapiens GN=LDHB PE=	0.86844
14-3-3 protein eta	YWHAH	>sp|Q04917|1433F_HUMAN 14-3-3 protein eta OS=Homo sapiens GN=YWHAH PE=1 SV=4;>tr|B2R6N6|B2R6N6_HUMAN cDNA, FLJ93036, highLy simiLar to Homo sapiens tyrosine 3-monooxygenase/tryptophan 5-monooxygenaseactivation protein, eta poLypeptide (YWHAH), mRNA OS=Homo	0.86901
ATP synthase subunit delta, mitochondrial	ATP5D	>sp|P30049|ATPD_HUMAN ATP synthase subunit deLta, mitochondriaL OS=Homo sapiens GN=ATP5D PE=1 SV=2	0.86929
Tubulin-specific chaperone A	TBCA	>tr|E5RHG6|E5RHG6_HUMAN TubuLin-specific chaperone A OS=Homo sapiens GN=TBCA PE=2 SV=2;>tr|B4DT30|B4DT30_HUMAN TubuLin-specific chaperone A OS=Homo sapiens GN=TBCA PE=2 SV=1;>tr|E5RJD8|E5RJD8_HUMAN TubuLin-specific chaperone A OS=Homo sapiens GN=TBCA PE=2	0.87036
U2 small nuclear ribonucleoprotein B	SNRPB2	>tr|B5BTZ8|B5BTZ8_HUMAN SmaLL nucLear ribonucLeoprotein poLypeptide B OS=Homo sapiens GN=SNRPB2 PE=2 SV=1;>sp|P08579|RU2B_HUMAN U2 smaLL nucLear ribonucLeoprotein B OS=Homo sapiens GN=SNRPB2 PE=1 SV=1	0.87053
Non-histone chromosomal protein HMG-14	HMGN1;hCG_17955	>tr|A6NEL0|A6NEL0_HUMAN Non-histone chromosomaL protein HMG-14 OS=Homo sapiens GN=HMGN1 PE=2 SV=1;>sp|P05114|HMGN1_HUMAN Non-histone chromosomaL protein HMG-14 OS=Homo sapiens GN=HMGN1 PE=1 SV=3;>tr|Q3B790|Q3B790_HUMAN High-mobiLity group nucLeosome bindin	0.87308
Proteasome subunit alpha type-5;Proteasome subunit alpha type	PSMA5	>sp|P28066|PSA5_HUMAN Proteasome subunit aLpha type-5 OS=Homo sapiens GN=PSMA5 PE=1 SV=3;>tr|Q5U0A0|Q5U0A0_HUMAN Proteasome subunit aLpha type OS=Homo sapiens PE=2 SV=1	0.87379
Histone acetyltransferase type B catalytic subunit	HAT1	>sp|O14929|HAT1_HUMAN Histone acetyLtransferase type B cataLytic subunit OS=Homo sapiens GN=HAT1 PE=1 SV=1	0.87391
Peroxiredoxin-2	PRDX2	>sp|P32119|PRDX2_HUMAN Peroxiredoxin-2 OS=Homo sapiens GN=PRDX2 PE=1 SV=5;>tr|B4DF70|B4DF70_HUMAN cDNA FLJ60461, highLy simiLar to Peroxiredoxin-2 (EC 1.11.1.15) OS=Homo sapiens PE=2 SV=1;>tr|A6NIW5|A6NIW5_HUMAN Peroxiredoxin 2, isoform CRA_a OS=Homo sapie	0.87777
60S ribosomal protein L32	RPL32	>tr|F8W727|F8W727_HUMAN 60S ribosomaL protein L32 OS=Homo sapiens GN=RPL32 PE=2 SV=1;>sp|P62910|RL32_HUMAN 60S ribosomaL protein L32 OS=Homo sapiens GN=RPL32 PE=1 SV=2;>tr|D3YTB1|D3YTB1_HUMAN 60S ribosomaL protein L32 (Fragment) OS=Homo sapiens GN=RPL32 PE	0.87893
Eukaryotic translation initiation factor 4 gamma 2	EIF4G2;AAG1;Nbla00315	>tr|B4DZF2|B4DZF2_HUMAN cDNA FLJ59571, highLy simiLar to Eukaryotic transLation initiation factor 4gamma 2 OS=Homo sapiens PE=2 SV=1;>tr|Q59G42|Q59G42_HUMAN Eukaryotic transLation initiation factor 4 gamma, 2 variant (Fragment) OS=Homo sapiens PE=2 SV=1;>t	0.8795
Ataxin-10	ATXN10;DKFZp434I1726	>sp|Q9UBB4|ATX10_HUMAN Ataxin-10 OS=Homo sapiens GN=ATXN10 PE=1 SV=1;>tr|B1AHE3|B1AHE3_HUMAN Ataxin-10 OS=Homo sapiens GN=ATXN10 PE=2 SV=1;>tr|Q9NTC6|Q9NTC6_HUMAN Putative uncharacterized protein DKFZp434I1726 (Fragment) OS=Homo sapiens GN=DKFZp434I1726 PE	0.87986
ADP-ribosylation factor 4	ARF4	>sp|P18085|ARF4_HUMAN ADP-ribosyLation factor 4 OS=Homo sapiens GN=ARF4 PE=1 SV=3;>tr|C9JPM4|C9JPM4_HUMAN ADP-ribosyLation factor 4 (Fragment) OS=Homo sapiens GN=ARF4 PE=2 SV=1;>tr|C9JAK5|C9JAK5_HUMAN ADP-ribosyLation factor 4 OS=Homo sapiens GN=ARF4 PE=2	0.88009
Enhancer of rudimentary homolog	ERH	>sp|P84090|ERH_HUMAN Enhancer of rudimentary homoLog OS=Homo sapiens GN=ERH PE=1 SV=1	0.88012
Nucleolar RNA helicase 2	DDX21	>sp|Q9NR30|DDX21_HUMAN NucLeoLar RNA heLicase 2 OS=Homo sapiens GN=DDX21 PE=1 SV=5	0.88024
Myosin regulatory light chain 12B;Myosin regulatory light chain 12A	MYL12B;MYL12A;MRLC3	>tr|J3QRS3|J3QRS3_HUMAN Myosin reguLatory Light chain 12A OS=Homo sapiens GN=MYL12A PE=4 SV=1;>sp|O14950|ML12B_HUMAN Myosin reguLatory Light chain 12B OS=Homo sapiens GN=MYL12B PE=1 SV=2;>sp|P19105|ML12A_HUMAN Myosin reguLatory Light chain 12A OS=Homo sapi	0.88331
Heat shock 70 kDa protein 4	HSPA4	>tr|B4DH02|B4DH02_HUMAN cDNA FLJ50510, highLy simiLar to Heat shock 70 kDa protein 4 OS=Homo sapiens PE=2 SV=1;>sp|P34932|HSP74_HUMAN Heat shock 70 kDa protein 4 OS=Homo sapiens GN=HSPA4 PE=1 SV=4;>tr|B4DUS3|B4DUS3_HUMAN cDNA FLJ50691, highLy simiLar to He	0.88431
Exportin-2	CSE1L	>sp|P55060|XPO2_HUMAN Exportin-2 OS=Homo sapiens GN=CSE1L PE=1 SV=3;>tr|B4DM31|B4DM31_HUMAN cDNA FLJ54022, highLy simiLar to Exportin-2 OS=Homo sapiens PE=2 SV=1;>tr|B4DUC5|B4DUC5_HUMAN Exportin-2 OS=Homo sapiens GN=CSE1L PE=2 SV=1;>tr|B4DPS6|B4DPS6_HUMAN	0.88642
Proliferating cell nuclear antigen	PCNA	>sp|P12004|PCNA_HUMAN ProLiferating ceLL nucLear antigen OS=Homo sapiens GN=PCNA PE=1 SV=1;>tr|Q6FHF5|Q6FHF5_HUMAN ProLiferating ceLL nucLear antigen (Fragment) OS=Homo sapiens GN=PCNA PE=2 SV=1;>tr|Q6FI35|Q6FI35_HUMAN ProLiferating ceLL nucLear antigen OS	0.88658
Nucleolin	NCL	>sp|P19338|NUCL_HUMAN NucLeoLin OS=Homo sapiens GN=NCL PE=1 SV=3;>tr|B3KTP9|B3KTP9_HUMAN cDNA FLJ38578 fis, cLone HCHON2007674, highLy simiLar to NUCLEOLIN OS=Homo sapiens PE=2 SV=1;>tr|Q6ZS99|Q6ZS99_HUMAN cDNA FLJ45706 fis, cLone FEBRA2028457, highLy simi	0.8867
Cytochrome c oxidase subunit 5B, mitochondrial	COX5B	>sp|P10606|COX5B_HUMAN Cytochrome c oxidase subunit 5B, mitochondriaL OS=Homo sapiens GN=COX5B PE=1 SV=2;>tr|Q6FHM4|Q6FHM4_HUMAN COX5B protein OS=Homo sapiens GN=COX5B PE=2 SV=1	0.88679
Flap endonuclease 1	FEN1	>sp|P39748|FEN1_HUMAN FLap endonucLease 1 OS=Homo sapiens GN=FEN1 PE=1 SV=1;>tr|Q6FHX6|Q6FHX6_HUMAN FLap endonucLease 1 OS=Homo sapiens GN=FEN1 PE=2 SV=1;>tr|F5H1Y3|F5H1Y3_HUMAN FLap endonucLease 1 (Fragment) OS=Homo sapiens GN=FEN1 PE=2 SV=1;>tr|B4DWZ4|B4	0.88686
Partner of Y14 and mago	WIBG	>sp|Q9BRP8|WIBG_HUMAN Partner of Y14 and mago OS=Homo sapiens GN=WIBG PE=1 SV=1	0.88889
Ras-related protein Rab-11B;Ras-related protein Rab-11A	RAB11B;RAB11A	>tr|B4DMN1|B4DMN1_HUMAN cDNA FLJ61136, highLy simiLar to Ras-reLated protein Rab-11A OS=Homo sapiens PE=2 SV=1;>tr|A5YM50|A5YM50_HUMAN RAB11B protein OS=Homo sapiens GN=RAB11B PE=2 SV=1;>sp|Q15907|RB11B_HUMAN Ras-reLated protein Rab-11B OS=Homo sapiens GN=	0.88892
Acidic leucine-rich nuclear phosphoprotein 32 family member A;Acidic leucine-rich nuclear phosphoprotein 32 family member C	ANP32A;ANP32C	>sp|P39687|AN32A_HUMAN Acidic Leucine-rich nucLear phosphoprotein 32 famiLy member A OS=Homo sapiens GN=ANP32A PE=1 SV=1;>tr|Q08AJ6|Q08AJ6_HUMAN ANP32A protein OS=Homo sapiens GN=ANP32A PE=2 SV=1;>tr|Q6PKH8|Q6PKH8_HUMAN ANP32A protein (Fragment) OS=Homo sa	0.88976
		>P34955 SWISS-PROT:P34955 (Bos taurus) Alpha-1-antiproteinase precursor;>gi|CON_IPI00695489.1|SWISS-PROT:P34955 (Bos taurus) ALpha-1-antiproteinase precursor	0.88988
40S ribosomal protein S26;Putative 40S ribosomal protein S26-like 1	RPS26;RPS26P11	>sp|P62854|RS26_HUMAN 40S ribosomaL protein S26 OS=Homo sapiens GN=RPS26 PE=1 SV=3;>sp|Q5JNZ5|RS26L_HUMAN Putative 40S ribosomaL protein S26-Like 1 OS=Homo sapiens GN=RPS26P11 PE=5 SV=1;>tr|Q75MH1|Q75MH1_HUMAN HCG1745083 OS=Homo sapiens GN=RPS26 PE=4 SV=1;	0.89259
Mitochondrial fission 1 protein	FIS1	>sp|Q9Y3D6|FIS1_HUMAN MitochondriaL fission 1 protein OS=Homo sapiens GN=FIS1 PE=1 SV=2	0.89319
Inosine-5-monophosphate dehydrogenase 2	IMPDH2	>sp|P12268|IMDH2_HUMAN Inosine-5-monophosphate dehydrogenase 2 OS=Homo sapiens GN=IMPDH2 PE=1 SV=2;>tr|H0Y4R1|H0Y4R1_HUMAN Inosine-5-monophosphate dehydrogenase 2 (Fragment) OS=Homo sapiens GN=IMPDH2 PE=3 SV=1;>tr|B7Z1G4|B7Z1G4_HUMAN cDNA FLJ61601, highL	0.89389
DBIRD complex subunit KIAA1967	KIAA1967	>tr|B3KTJ9|B3KTJ9_HUMAN cDNA FLJ38393 fis, cLone FEBRA2007212 OS=Homo sapiens PE=2 SV=1;>sp|Q8N163|K1967_HUMAN DBIRD compLex subunit KIAA1967 OS=Homo sapiens GN=KIAA1967 PE=1 SV=2;>tr|H0YB24|H0YB24_HUMAN DBIRD compLex subunit KIAA1967 (Fragment) OS=Homo sa	0.89445
Up-regulated during skeletal muscle growth protein 5	USMG5	>sp|Q96IX5|USMG5_HUMAN Up-reguLated during skeLetaL muscLe growth protein 5 OS=Homo sapiens GN=USMG5 PE=1 SV=1	0.89468
Signal recognition particle 9 kDa protein	SRP9;DKFZp564M2223	>sp|P49458|SRP09_HUMAN SignaL recognition particLe 9 kDa protein OS=Homo sapiens GN=SRP9 PE=1 SV=2;>tr|E9PE20|E9PE20_HUMAN SignaL recognition particLe 9 kDa protein OS=Homo sapiens GN=SRP9 PE=2 SV=1;>tr|Q659G3|Q659G3_HUMAN Putative uncharacterized protein	0.89544
Trifunctional purine biosynthetic protein adenosine-3;Phosphoribosylamine--glycine ligase;Phosphoribosylformylglycinamidine cyclo-ligase;Phosphoribosylglycinamide formyltransferase	GART	>tr|Q59HH3|Q59HH3_HUMAN PhosphoribosyLgLycinamide formyLtransferase, phosphoribosyLgLycinamide synthetase, phosphoribosyLaminoimidazoLe synthetase isoform 1 variant (Fragment) OS=Homo sapiens PE=2 SV=1;>sp|P22102|PUR2_HUMAN TrifunctionaL purine biosyntheti	0.89567
Translocon-associated protein subunit gamma	SSR3	>tr|B4E2P2|B4E2P2_HUMAN TransLocon-associated protein subunit gamma OS=Homo sapiens GN=SSR3 PE=2 SV=1;>sp|Q9UNL2|SSRG_HUMAN TransLocon-associated protein subunit gamma OS=Homo sapiens GN=SSR3 PE=1 SV=1;>tr|C9JA28|C9JA28_HUMAN TransLocon-associated protein	0.89674
Eukaryotic translation initiation factor 3 subunit G	EIF3G;EIF3S4	>tr|A8K5K5|A8K5K5_HUMAN Eukaryotic transLation initiation factor 3 subunit G OS=Homo sapiens GN=EIF3G PE=2 SV=1;>sp|O75821|EIF3G_HUMAN Eukaryotic transLation initiation factor 3 subunit G OS=Homo sapiens GN=EIF3G PE=1 SV=2;>tr|Q6IAM0|Q6IAM0_HUMAN Eukaryoti	0.8976
Serine/threonine-protein kinase PAK 2;PAK-2p27;PAK-2p34	PAK2	>tr|A8K5M4|A8K5M4_HUMAN cDNA FLJ75088, highLy simiLar to Homo sapiens p21 (CDKN1A)-activated kinase 2 (PAK2), mRNA OS=Homo sapiens PE=2 SV=1;>sp|Q13177|PAK2_HUMAN Serine/threonine-protein kinase PAK 2 OS=Homo sapiens GN=PAK2 PE=1 SV=3	0.89967
	TTN	>tr|A2TKE4|A2TKE4_HUMAN CeLLuLar titin isoform PEVK variant 2 (Fragment) OS=Homo sapiens GN=TTN PE=2 SV=1	0.89968
BRI3-binding protein	BRI3BP	>sp|Q8WY22|BRI3B_HUMAN BRI3-binding protein OS=Homo sapiens GN=BRI3BP PE=1 SV=1	0.90259
Prefoldin subunit 4	PFDN4	>tr|E9PQY2|E9PQY2_HUMAN PrefoLdin subunit 4 OS=Homo sapiens GN=PFDN4 PE=2 SV=1;>sp|Q9NQP4|PFD4_HUMAN PrefoLdin subunit 4 OS=Homo sapiens GN=PFDN4 PE=1 SV=1	0.9026
Peroxiredoxin-6	PRDX6	>sp|P30041|PRDX6_HUMAN Peroxiredoxin-6 OS=Homo sapiens GN=PRDX6 PE=1 SV=3	0.9031
40S ribosomal protein S20	RPS20	>sp|P60866|RS20_HUMAN 40S ribosomaL protein S20 OS=Homo sapiens GN=RPS20 PE=1 SV=1;>tr|G3XAN0|G3XAN0_HUMAN 40S ribosomaL protein S20 OS=Homo sapiens GN=RPS20 PE=4 SV=1;>tr|E5RJX2|E5RJX2_HUMAN 40S ribosomaL protein S20 OS=Homo sapiens GN=RPS20 PE=4 SV=1;>tr	0.90413
Serine/arginine-rich splicing factor 8;Serine/arginine-rich splicing factor 2	SRSF8;SRSF2;SFRS2;LOC392896;LOC346472	>sp|Q9BRL6|SRSF8_HUMAN Serine/arginine-rich spLicing factor 8 OS=Homo sapiens GN=SRSF8 PE=1 SV=1;>sp|Q01130|SRSF2_HUMAN Serine/arginine-rich spLicing factor 2 OS=Homo sapiens GN=SRSF2 PE=1 SV=4;>tr|Q53FN0|Q53FN0_HUMAN SpLicing factor, arginine/serine-rich	0.9063
Prohibitin-2	PHB2	>tr|J3KPX7|J3KPX7_HUMAN Prohibitin-2 OS=Homo sapiens GN=PHB2 PE=4 SV=1;>sp|Q99623|PHB2_HUMAN Prohibitin-2 OS=Homo sapiens GN=PHB2 PE=1 SV=2;>tr|F5GY37|F5GY37_HUMAN Prohibitin-2 OS=Homo sapiens GN=PHB2 PE=2 SV=1	0.90632
X-ray repair cross-complementing protein 5	XRCC5	>sp|P13010|XRCC5_HUMAN X-ray repair cross-compLementing protein 5 OS=Homo sapiens GN=XRCC5 PE=1 SV=3;>tr|Q53T09|Q53T09_HUMAN Putative uncharacterized protein XRCC5 (Fragment) OS=Homo sapiens GN=XRCC5 PE=2 SV=1	0.9066
Charged multivesicular body protein 4b	CHMP4B	>sp|Q9H444|CHM4B_HUMAN Charged muLtivesicuLar body protein 4b OS=Homo sapiens GN=CHMP4B PE=1 SV=1	0.90865
Small nuclear ribonucleoprotein F	SNRPF	>sp|P62306|RUXF_HUMAN SmaLL nucLear ribonucLeoprotein F OS=Homo sapiens GN=SNRPF PE=1 SV=1	0.90886
Small nuclear ribonucleoprotein Sm D3	SNRPD3	>sp|P62318|SMD3_HUMAN SmaLL nucLear ribonucLeoprotein Sm D3 OS=Homo sapiens GN=SNRPD3 PE=1 SV=1;>tr|B4DJP7|B4DJP7_HUMAN SmaLL nucLear ribonucLeoprotein Sm D3 OS=Homo sapiens GN=SNRPD3 PE=2 SV=1	0.90947
Microtubule-associated protein;Microtubule-associated protein 4	MAP4	>tr|E7EVA0|E7EVA0_HUMAN MicrotubuLe-associated protein OS=Homo sapiens GN=MAP4 PE=2 SV=1;>sp|P27816|MAP4_HUMAN MicrotubuLe-associated protein 4 OS=Homo sapiens GN=MAP4 PE=1 SV=3;>tr|E9PGM5|E9PGM5_HUMAN MicrotubuLe-associated protein OS=Homo sapiens GN=MAP4	0.91027
Nucleosome assembly protein 1-like 1	NAP1L1	>sp|P55209|NP1L1_HUMAN NucLeosome assembLy protein 1-Like 1 OS=Homo sapiens GN=NAP1L1 PE=1 SV=1;>tr|H0YIV4|H0YIV4_HUMAN NucLeosome assembLy protein 1-Like 1 (Fragment) OS=Homo sapiens GN=NAP1L1 PE=2 SV=1;>tr|B7Z2V4|B7Z2V4_HUMAN cDNA FLJ60539, highLy simiLa	0.91205
40S ribosomal protein S8	RPS8	>sp|P62241|RS8_HUMAN 40S ribosomaL protein S8 OS=Homo sapiens GN=RPS8 PE=1 SV=2;>tr|Q5JR94|Q5JR94_HUMAN 40S ribosomaL protein S8 OS=Homo sapiens GN=RPS8 PE=2 SV=1;>tr|Q5JR95|Q5JR95_HUMAN 40S ribosomaL protein S8 OS=Homo sapiens GN=RPS8 PE=2 SV=1;>tr|Q9BS10	0.91278
RuvB-like 1	RUVBL1	>tr|B5BUB1|B5BUB1_HUMAN RuvB-Like 1 (Fragment) OS=Homo sapiens GN=RUVBL1 PE=2 SV=1;>sp|Q9Y265|RUVB1_HUMAN RuvB-Like 1 OS=Homo sapiens GN=RUVBL1 PE=1 SV=1;>tr|B3KRS7|B3KRS7_HUMAN cDNA FLJ34844 fis, cLone NT2NE2011154, highLy simiLar to RuvB-Like 1 OS=Homo s	0.91354
Glyoxalase domain-containing protein 4	C17orf25;GLOD4	>tr|Q9Y3E8|Q9Y3E8_HUMAN CGI-150 protein OS=Homo sapiens GN=C17orf25 PE=2 SV=1;>sp|Q9HC38|GLOD4_HUMAN GLyoxaLase domain-containing protein 4 OS=Homo sapiens GN=GLOD4 PE=1 SV=1;>tr|A8K8F0|A8K8F0_HUMAN cDNA FLJ76436 OS=Homo sapiens PE=2 SV=1;>tr|B7Z403|B7Z403	0.91403
40S ribosomal protein S19	RPS19	>tr|Q8WVX7|Q8WVX7_HUMAN RibosomaL protein S19 (Fragment) OS=Homo sapiens PE=2 SV=1;>tr|B0ZBD0|B0ZBD0_HUMAN 40S ribosomaL protein S19 OS=Homo sapiens GN=RPS19 PE=2 SV=1;>sp|P39019|RS19_HUMAN 40S ribosomaL protein S19 OS=Homo sapiens GN=RPS19 PE=1 SV=2;>tr|M	0.91442
Hsp90 co-chaperone Cdc37	CDC37;MBD5	>sp|Q16543|CDC37_HUMAN Hsp90 co-chaperone Cdc37 OS=Homo sapiens GN=CDC37 PE=1 SV=1;>tr|Q6FG59|Q6FG59_HUMAN CDC37 protein OS=Homo sapiens GN=CDC37 PE=2 SV=1;>tr|A1L0W4|A1L0W4_HUMAN CDC37 protein (Fragment) OS=Homo sapiens GN=MBD5 PE=2 SV=1;>tr|K7EQA9|K7EQA9	0.91451
X-ray repair cross-complementing protein 6	XRCC6	>tr|B2RDN9|B2RDN9_HUMAN cDNA, FLJ96699, highLy simiLar to Homo sapiens thyroid autoantigen 70kDa (Ku antigen) (G22P1), mRNA OS=Homo sapiens PE=2 SV=1;>sp|P12956|XRCC6_HUMAN X-ray repair cross-compLementing protein 6 OS=Homo sapiens GN=XRCC6 PE=1 SV=2;>tr|B	0.91463
Ras-related protein Rab-5C	RAB5C	>sp|P51148|RAB5C_HUMAN Ras-reLated protein Rab-5C OS=Homo sapiens GN=RAB5C PE=1 SV=2;>tr|K7EIP6|K7EIP6_HUMAN Uncharacterized protein (Fragment) OS=Homo sapiens PE=4 SV=1	0.91828
Heat shock 70 kDa protein 6;Putative heat shock 70 kDa protein 7	HSPA6;HSPA7	>tr|B2R6X5|B2R6X5_HUMAN cDNA, FLJ93166, highLy simiLar to Homo sapiens heat shock 70kDa protein 6 (HSP70B) (HSPA6), mRNA OS=Homo sapiens PE=2 SV=1;>tr|B3KSM6|B3KSM6_HUMAN cDNA FLJ36606 fis, cLone TRACH2015654, highLy simiLar to HEAT SHOCK 70 kDa PROTEIN 6	0.91901
60S ribosomal protein L30	RPL30	>sp|P62888|RL30_HUMAN 60S ribosomaL protein L30 OS=Homo sapiens GN=RPL30 PE=1 SV=2;>tr|E5RI99|E5RI99_HUMAN 60S ribosomaL protein L30 (Fragment) OS=Homo sapiens GN=RPL30 PE=2 SV=1	0.92048
Phosphatidylethanolamine-binding protein 1;Hippocampal cholinergic neurostimulating peptide	PEBP1	>tr|D9IAI1|D9IAI1_HUMAN PhosphatidyLethanoLamine-binding protein 1 OS=Homo sapiens PE=2 SV=1;>sp|P30086|PEBP1_HUMAN PhosphatidyLethanoLamine-binding protein 1 OS=Homo sapiens GN=PEBP1 PE=1 SV=3;>tr|B4DRT4|B4DRT4_HUMAN cDNA FLJ51535, highLy simiLar to Phosp	0.92156
60S ribosomal protein L31	RPL31	>tr|B7Z4C8|B7Z4C8_HUMAN 60S ribosomaL protein L31 OS=Homo sapiens GN=RPL31 PE=2 SV=1;>tr|B2R4C1|B2R4C1_HUMAN cDNA, FLJ92036, highLy simiLar to Homo sapiens ribosomaL protein L31 (RPL31), mRNA OS=Homo sapiens PE=2 SV=1;>sp|P62899|RL31_HUMAN 60S ribosomaL pr	0.92359
Elongation factor Tu, mitochondrial	TUFM	>sp|P49411|EFTU_HUMAN ELongation factor Tu, mitochondriaL OS=Homo sapiens GN=TUFM PE=1 SV=2	0.92526
Ras-related protein Rab-8A	RAB8A	>sp|P61006|RAB8A_HUMAN Ras-reLated protein Rab-8A OS=Homo sapiens GN=RAB8A PE=1 SV=1	0.92572
Sodium/potassium-transporting ATPase subunit alpha-1;Sodium/potassium-transporting ATPase subunit alpha-2;Sodium/potassium-transporting ATPase subunit alpha-3;Potassium-transporting ATPase alpha chain 1	ATP1A1;ATP1A2;ATP1A3;ATP4A;DKFZp666G172	>tr|B7Z9V4|B7Z9V4_HUMAN cDNA, FLJ78968, highLy simiLar to Sodium/potassium-transporting ATPase aLpha-3 chain (EC 3.6.3.9) OS=Homo sapiens PE=2 SV=1;>sp|P05023|AT1A1_HUMAN Sodium/potassium-transporting ATPase subunit aLpha-1 OS=Homo sapiens GN=ATP1A1 PE=1 S	0.92621
Sodium/potassium-transporting ATPase subunit beta-3	ATP1B3	>sp|P54709|AT1B3_HUMAN Sodium/potassium-transporting ATPase subunit beta-3 OS=Homo sapiens GN=ATP1B3 PE=1 SV=1;>tr|F8WBY4|F8WBY4_HUMAN Sodium/potassium-transporting ATPase subunit beta-3 OS=Homo sapiens GN=ATP1B3 PE=2 SV=1;>tr|H7C547|H7C547_HUMAN Sodium/po	0.92719
Glutathione S-transferase P	GSTP1	>sp|P09211|GSTP1_HUMAN GLutathione S-transferase P OS=Homo sapiens GN=GSTP1 PE=1 SV=2;>tr|A8MX94|A8MX94_HUMAN GLutathione S-transferase P OS=Homo sapiens GN=GSTP1 PE=2 SV=1	0.92764
Keratin, type II cytoskeletal 1;Keratin, type II cytoskeletal 2 epidermal;Keratin, type II cytoskeletal 1b	KRT1;KRT2;KRT77	>tr|H6VRG1|H6VRG1_HUMAN Keratin 1 OS=Homo sapiens GN=KRT1 PE=2 SV=1;>P04264 SWISS-PROT:P04264 Tax_Id=9606 Gene_Symbol=KRT1 Keratin, type II cytoskeletal 1;>gi|CON_IPI00220327.3|SWISS-PROT:P04264 Tax_Id=9606 Gene_SymboL=KRT1 Keratin, type II cytoskeLetaL 1;	0.92795
40S ribosomal protein S14	RPS14	>sp|P62263|RS14_HUMAN 40S ribosomaL protein S14 OS=Homo sapiens GN=RPS14 PE=1 SV=3	0.92816
Proteasome subunit alpha type-7-like;Proteasome subunit alpha type-7;Proteasome subunit alpha type	PSMA8;PSMA7	>sp|Q8TAA3|PSA7L_HUMAN Proteasome subunit aLpha type-7-Like OS=Homo sapiens GN=PSMA8 PE=1 SV=3;>sp|O14818|PSA7_HUMAN Proteasome subunit aLpha type-7 OS=Homo sapiens GN=PSMA7 PE=1 SV=1;>tr|Q05DH1|Q05DH1_HUMAN Proteasome subunit aLpha type (Fragment) OS=Homo	0.92867
Cystatin-B	CSTB	>sp|P04080|CYTB_HUMAN Cystatin-B OS=Homo sapiens GN=CSTB PE=1 SV=2;>tr|Q76LA1|Q76LA1_HUMAN CSTB protein OS=Homo sapiens GN=CSTB PE=2 SV=1	0.92897
Elongation factor 1-delta	EEF1D	>tr|E9PRY8|E9PRY8_HUMAN ELongation factor 1-deLta OS=Homo sapiens GN=EEF1D PE=2 SV=1;>tr|B2RAR6|B2RAR6_HUMAN cDNA, FLJ95068, highLy simiLar to Homo sapiens eukaryotic transLation eLongation factor 1 deLta (guanine nucLeotide exchange protein) (EEF1D), tran	0.92906
Splicing factor 3B subunit 4	SF3B4	>tr|B3KUJ0|B3KUJ0_HUMAN cDNA FLJ39996 fis, cLone STOMA2002166, highLy simiLar to SpLicing factor 3B subunit 4 OS=Homo sapiens PE=2 SV=1;>sp|Q15427|SF3B4_HUMAN SpLicing factor 3B subunit 4 OS=Homo sapiens GN=SF3B4 PE=1 SV=1;>tr|Q53FG6|Q53FG6_HUMAN SpLicing	0.92933
Heterogeneous nuclear ribonucleoprotein K	HNRPK;HNRNPK	>tr|Q5EC54|Q5EC54_HUMAN Heterogeneous nucLear ribonucLeoprotein K transcript variant OS=Homo sapiens GN=HNRPK PE=2 SV=1;>tr|Q6IBN1|Q6IBN1_HUMAN HNRPK protein OS=Homo sapiens GN=HNRPK PE=2 SV=1;>sp|P61978|HNRPK_HUMAN Heterogeneous nucLear ribonucLeoprotein	0.92957
Transmembrane protein 109	TMEM109	>tr|B2R9T9|B2R9T9_HUMAN cDNA, FLJ94551 OS=Homo sapiens PE=2 SV=1;>sp|Q9BVC6|TM109_HUMAN Transmembrane protein 109 OS=Homo sapiens GN=TMEM109 PE=1 SV=1;>tr|B4E1S3|B4E1S3_HUMAN cDNA FLJ57860, highLy simiLar to Transmembrane protein 109 OS=Homo sapiens PE=2 S	0.92992
Splicing factor U2AF 65 kDa subunit	U2AF2	>sp|P26368|U2AF2_HUMAN SpLicing factor U2AF 65 kDa subunit OS=Homo sapiens GN=U2AF2 PE=1 SV=4;>tr|B5BU25|B5BU25_HUMAN U2 smaLL nucLear RNA auxiLiary factor 2 isoform b OS=Homo sapiens GN=U2AF2 PE=2 SV=1;>tr|K7ENG2|K7ENG2_HUMAN SpLicing factor U2AF 65 kDa s	0.93011
Thioredoxin domain-containing protein 17	TXNDC17	>sp|Q9BRA2|TXD17_HUMAN Thioredoxin domain-containing protein 17 OS=Homo sapiens GN=TXNDC17 PE=1 SV=1;>tr|I3L3M7|I3L3M7_HUMAN Thioredoxin domain-containing protein 17 OS=Homo sapiens GN=TXNDC17 PE=2 SV=1;>tr|I3L0K2|I3L0K2_HUMAN Thioredoxin domain-containing	0.93019
BH3-interacting domain death agonist;BH3-interacting domain death agonist p15;BH3-interacting domain death agonist p13;BH3-interacting domain death agonist p11	BID	>tr|B3KT21|B3KT21_HUMAN cDNA FLJ37476 fis, cLone BRAWH2012827, highLy simiLar to Homo sapiens BH3 interacting domain death agonist (BID), transcript variant 1, mRNA OS=Homo sapiens PE=2 SV=1;>tr|A8ASI8|A8ASI8_HUMAN BH3 interacting domain death agonist, iso	0.93035
Heat shock protein HSP 90-alpha	HSP90AA1	>tr|K9JA46|K9JA46_HUMAN Epididymis LuminaL secretory protein 52 OS=Homo sapiens GN=EL52 PE=2 SV=1;>sp|P07900|HS90A_HUMAN Heat shock protein HSP 90-aLpha OS=Homo sapiens GN=HSP90AA1 PE=1 SV=5;>tr|Q2VPJ6|Q2VPJ6_HUMAN HSP90AA1 protein (Fragment) OS=Homo sapie	0.93114
T-complex protein 1 subunit epsilon	CCT5	>tr|A8K2X8|A8K2X8_HUMAN cDNA FLJ78433, highLy simiLar to Homo sapiens chaperonin containing TCP1, subunit 5 (epsiLon) (CCT5), mRNA OS=Homo sapiens PE=2 SV=1;>sp|P48643|TCPE_HUMAN T-compLex protein 1 subunit epsiLon OS=Homo sapiens GN=CCT5 PE=1 SV=1;>tr|Q9B	0.93204
Heterogeneous nuclear ribonucleoprotein U-like protein 2	HNRNPUL2;hCG_2044799	>sp|Q1KMD3|HNRL2_HUMAN Heterogeneous nucLear ribonucLeoprotein U-Like protein 2 OS=Homo sapiens GN=HNRNPUL2 PE=1 SV=1;>tr|H3BQZ7|H3BQZ7_HUMAN HCG2044799 OS=Homo sapiens GN=hCG_2044799 PE=4 SV=1	0.93338
Nucleoprotein TPR	TPR	>sp|P12270|TPR_HUMAN NucLeoprotein TPR OS=Homo sapiens GN=TPR PE=1 SV=3	0.93382
Heterogeneous nuclear ribonucleoprotein D0	HNRNPD	>sp|Q14103|HNRPD_HUMAN Heterogeneous nucLear ribonucLeoprotein D0 OS=Homo sapiens GN=HNRNPD PE=1 SV=1;>tr|D6RAF8|D6RAF8_HUMAN Heterogeneous nucLear ribonucLeoprotein D0 (Fragment) OS=Homo sapiens GN=HNRNPD PE=2 SV=1;>tr|B4DTC3|B4DTC3_HUMAN Heterogeneous nu	0.93387
14-3-3 protein beta/alpha;14-3-3 protein beta/alpha, N-terminally processed	YWHAB	>sp|P31946|1433B_HUMAN 14-3-3 protein beta/aLpha OS=Homo sapiens GN=YWHAB PE=1 SV=3;>tr|B5BU24|B5BU24_HUMAN 14-3-3 protein beta/aLpha OS=Homo sapiens GN=YWHAB PE=2 SV=1	0.93417
ATP-citrate synthase	ACLY variant protein;ACLY	>tr|Q4LE36|Q4LE36_HUMAN ACLY variant protein (Fragment) OS=Homo sapiens GN=ACLY variant protein PE=2 SV=1;>sp|P53396|ACLY_HUMAN ATP-citrate synthase OS=Homo sapiens GN=ACLY PE=1 SV=3;>tr|B4E3P0|B4E3P0_HUMAN ATP-citrate synthase OS=Homo sapiens GN=ACLY PE=2	0.9345
Plasminogen activator inhibitor 1 RNA-binding protein	SERBP1;DKFZp686P17171	>tr|D3DQ70|D3DQ70_HUMAN SERPINE1 mRNA binding protein 1, isoform CRA_d OS=Homo sapiens GN=SERBP1 PE=2 SV=1;>tr|D3DQ69|D3DQ69_HUMAN SERPINE1 mRNA binding protein 1, isoform CRA_c OS=Homo sapiens GN=SERBP1 PE=2 SV=1;>sp|Q8NC51|PAIRB_HUMAN PLasminogen activat	0.93467
60S ribosomal protein L3	RPL3;rpl3	>sp|P39023|RL3_HUMAN 60S ribosomaL protein L3 OS=Homo sapiens GN=RPL3 PE=1 SV=2;>tr|Q8TBW1|Q8TBW1_HUMAN Putative uncharacterized protein (Fragment) OS=Homo sapiens PE=2 SV=1;>tr|B3KS36|B3KS36_HUMAN cDNA FLJ35376 fis, cLone SKMUS2004044, highLy simiLar to H	0.93498
60S ribosomal protein L36	RPL36	>sp|Q9Y3U8|RL36_HUMAN 60S ribosomaL protein L36 OS=Homo sapiens GN=RPL36 PE=1 SV=3;>tr|J3QSB5|J3QSB5_HUMAN 60S ribosomaL protein L36 OS=Homo sapiens GN=RPL36 PE=3 SV=1	0.9363
Nuclear autoantigenic sperm protein	NASP	>sp|P49321|NASP_HUMAN NucLear autoantigenic sperm protein OS=Homo sapiens GN=NASP PE=1 SV=2;>tr|Q5T626|Q5T626_HUMAN NucLear autoantigenic sperm protein (Histone-binding) OS=Homo sapiens GN=NASP PE=2 SV=1;>tr|O95138|O95138_HUMAN NucLear autoantigenic sperm	0.93631
Eukaryotic translation initiation factor 3 subunit H	EIF3S3;EIF3H	>tr|B3KS98|B3KS98_HUMAN Eukaryotic transLation initiation factor 3 subunit H OS=Homo sapiens GN=EIF3S3 PE=2 SV=1;>sp|O15372|EIF3H_HUMAN Eukaryotic transLation initiation factor 3 subunit H OS=Homo sapiens GN=EIF3H PE=1 SV=1;>tr|Q53HG0|Q53HG0_HUMAN Eukaryot	0.93653
Myosin light polypeptide 6	MYL6	>tr|B7Z6Z4|B7Z6Z4_HUMAN Myosin Light poLypeptide 6 OS=Homo sapiens GN=MYL6 PE=2 SV=1;>tr|G3V1V0|G3V1V0_HUMAN Myosin Light poLypeptide 6 OS=Homo sapiens GN=MYL6 PE=4 SV=1;>tr|G8JLA2|G8JLA2_HUMAN Myosin Light poLypeptide 6 OS=Homo sapiens GN=MYL6 PE=2 SV=1;>	0.9366
Elongation factor 1-alpha 1;Elongation factor 1-alpha;Putative elongation factor 1-alpha-like 3;Elongation factor 1-alpha 2	EEF1A1;EEF1A1P5;EEF1A1L14;PTI-1;EEF1A2	>sp|P68104|EF1A1_HUMAN ELongation factor 1-aLpha 1 OS=Homo sapiens GN=EEF1A1 PE=1 SV=1;>tr|Q53GE9|Q53GE9_HUMAN ELongation factor 1-aLpha (Fragment) OS=Homo sapiens PE=2 SV=1;>tr|Q53HM9|Q53HM9_HUMAN ELongation factor 1-aLpha (Fragment) OS=Homo sapiens PE=2	0.93882
dCTP pyrophosphatase 1	DCTPP1	>sp|Q9H773|DCTP1_HUMAN dCTP pyrophosphatase 1 OS=Homo sapiens GN=DCTPP1 PE=1 SV=1	0.94052
60S acidic ribosomal protein P2	RPLP2	>sp|P05387|RLA2_HUMAN 60S acidic ribosomaL protein P2 OS=Homo sapiens GN=RPLP2 PE=1 SV=1;>tr|H0YDD8|H0YDD8_HUMAN 60S acidic ribosomaL protein P2 (Fragment) OS=Homo sapiens GN=RPLP2 PE=3 SV=1	0.94058
Transaldolase	TALDO1	>sp|P37837|TALDO_HUMAN TransaLdoLase OS=Homo sapiens GN=TALDO1 PE=1 SV=2;>tr|F2Z393|F2Z393_HUMAN TransaLdoLase OS=Homo sapiens GN=TALDO1 PE=2 SV=1	0.94117
Trypsin-1;Alpha-trypsin chain 1;Alpha-trypsin chain 2	PRSS1;PRSS3	>tr|E7EQ64|E7EQ64_HUMAN Trypsin-1 OS=Homo sapiens GN=PRSS1 PE=2 SV=1;>tr|A1A508|A1A508_HUMAN PRSS3 protein OS=Homo sapiens GN=PRSS3 PE=2 SV=1;>P07477 SWISS-PROT:P07477 Tax_Id=9606 Gene_Symbol=PRSS1 Trypsin-1 precursor;>gi|CON_IPI00011694.1|SWISS-PROT:P0747	0.94234
Coatomer subunit alpha;Xenin;Proxenin	COPA	>sp|P53621|COPA_HUMAN Coatomer subunit aLpha OS=Homo sapiens GN=COPA PE=1 SV=2	0.94386
Small nuclear ribonucleoprotein Sm D2	SNRPD2	>sp|P62316|SMD2_HUMAN SmaLL nucLear ribonucLeoprotein Sm D2 OS=Homo sapiens GN=SNRPD2 PE=1 SV=1;>tr|K7ERG4|K7ERG4_HUMAN SmaLL nucLear ribonucLeoprotein Sm D2 OS=Homo sapiens GN=SNRPD2 PE=4 SV=1	0.94496
C-1-tetrahydrofolate synthase, cytoplasmic;Methylenetetrahydrofolate dehydrogenase;Methenyltetrahydrofolate cyclohydrolase;Formyltetrahydrofolate synthetase	MTHFD1	>tr|B7Z809|B7Z809_HUMAN cDNA FLJ56016, highLy simiLar to C-1-tetrahydrofoLate synthase, cytopLasmic OS=Homo sapiens PE=2 SV=1;>tr|F5H2F4|F5H2F4_HUMAN C-1-tetrahydrofoLate synthase, cytopLasmic OS=Homo sapiens GN=MTHFD1 PE=2 SV=1;>tr|G3V2B8|G3V2B8_HUMAN C-1	0.94513
Interleukin enhancer-binding factor 3	ILF3	>tr|F4ZW66|F4ZW66_HUMAN NF110b OS=Homo sapiens PE=2 SV=1;>sp|Q12906|ILF3_HUMAN InterLeukin enhancer-binding factor 3 OS=Homo sapiens GN=ILF3 PE=1 SV=3;>tr|F4ZW65|F4ZW65_HUMAN NF90b OS=Homo sapiens PE=2 SV=1;>tr|A8K590|A8K590_HUMAN cDNA FLJ77456, highLy sim	0.94589
D-3-phosphoglycerate dehydrogenase	PHGDH;PGDH3	>sp|O43175|SERA_HUMAN D-3-phosphogLycerate dehydrogenase OS=Homo sapiens GN=PHGDH PE=1 SV=4;>tr|B3KSC3|B3KSC3_HUMAN cDNA FLJ35987 fis, cLone TESTI2014269, highLy simiLar to D-3-phosphogLycerate dehydrogenase (EC 1.1.1.95) OS=Homo sapiens PE=2 SV=1;>tr|Q5SZ	0.94814
T-complex protein 1 subunit theta	CCT8	>sp|P50990|TCPQ_HUMAN T-compLex protein 1 subunit theta OS=Homo sapiens GN=CCT8 PE=1 SV=4;>tr|Q53HU0|Q53HU0_HUMAN Chaperonin containing TCP1, subunit 8 (Theta) variant (Fragment) OS=Homo sapiens PE=2 SV=1;>tr|B4DEM7|B4DEM7_HUMAN T-compLex protein 1 subunit	0.94825
Acidic leucine-rich nuclear phosphoprotein 32 family member B	ANP32B	>sp|Q92688|AN32B_HUMAN Acidic Leucine-rich nucLear phosphoprotein 32 famiLy member B OS=Homo sapiens GN=ANP32B PE=1 SV=1;>tr|Q53F35|Q53F35_HUMAN Acidic (Leucine-rich) nucLear phosphoprotein 32 famiLy, member B variant (Fragment) OS=Homo sapiens PE=2 SV=1;>	0.94938
Crk-like protein	CRKL	>sp|P46109|CRKL_HUMAN Crk-Like protein OS=Homo sapiens GN=CRKL PE=1 SV=1	0.94969
Probable ATP-dependent RNA helicase DDX17	DDX17	>tr|Q59F66|Q59F66_HUMAN DEAD box poLypeptide 17 isoform p82 variant (Fragment) OS=Homo sapiens PE=2 SV=1;>tr|H3BLZ8|H3BLZ8_HUMAN ProbabLe ATP-dependent RNA heLicase DDX17 OS=Homo sapiens GN=DDX17 PE=2 SV=1;>sp|Q92841|DDX17_HUMAN ProbabLe ATP-dependent RNA	0.95043
Stress-70 protein, mitochondrial	HSPA9	>sp|P38646|GRP75_HUMAN Stress-70 protein, mitochondriaL OS=Homo sapiens GN=HSPA9 PE=1 SV=2;>tr|B7Z4V2|B7Z4V2_HUMAN cDNA FLJ51907, highLy simiLar to Stress-70 protein, mitochondriaL OS=Homo sapiens PE=2 SV=1;>tr|Q8N1C8|Q8N1C8_HUMAN HSPA9 protein (Fragment)	0.95143
Tubulin beta-8 chain	TUBB8;RP11-631M21.2	>sp|Q3ZCM7|TBB8_HUMAN TubuLin beta-8 chain OS=Homo sapiens GN=TUBB8 PE=1 SV=2;>tr|Q5SQY0|Q5SQY0_HUMAN TubuLin beta-8 chain OS=Homo sapiens GN=TUBB8 PE=3 SV=1;>tr|F5H0I4|F5H0I4_HUMAN TubuLin beta-8 chain OS=Homo sapiens GN=TUBB8 PE=2 SV=1	0.95151
60S ribosomal protein L29	RPL29;RP11-632C17__A.1-001	>tr|Q6IPI1|Q6IPI1_HUMAN RibosomaL protein L29 OS=Homo sapiens GN=RPL29 PE=2 SV=1;>sp|P47914|RL29_HUMAN 60S ribosomaL protein L29 OS=Homo sapiens GN=RPL29 PE=1 SV=2;>tr|Q5T1D1|Q5T1D1_HUMAN RibosomaL protein L29 (RPL29) pseudogene OS=Homo sapiens GN=RP11-632	0.95176
Single-stranded DNA-binding protein, mitochondrial	SSBP1	>tr|B7Z268|B7Z268_HUMAN SingLe-stranded DNA-binding protein OS=Homo sapiens GN=SSBP1 PE=2 SV=1;>tr|A4D1U3|A4D1U3_HUMAN SingLe-stranded DNA-binding protein OS=Homo sapiens GN=SSBP1 PE=2 SV=1;>sp|Q04837|SSBP_HUMAN SingLe-stranded DNA-binding protein, mitocho	0.95356
Septin-6	2020-09-06	>tr|Q8NFH9|Q8NFH9_HUMAN MLL/SEPTIN6 fusion protein (Fragment) OS=Homo sapiens PE=2 SV=1;>tr|Q8NFI0|Q8NFI0_HUMAN MLL/SEPTIN6 fusion protein (Fragment) OS=Homo sapiens PE=2 SV=1;>tr|Q8NFI2|Q8NFI2_HUMAN MLL/SEPTIN6 fusion protein (Fragment) OS=Homo sapiens PE	0.95424
Voltage-dependent anion-selective channel protein 2	VDAC2	>sp|P45880|VDAC2_HUMAN VoLtage-dependent anion-seLective channeL protein 2 OS=Homo sapiens GN=VDAC2 PE=1 SV=2;>tr|B4DKM5|B4DKM5_HUMAN VoLtage-dependent anion-seLective channeL protein 2 OS=Homo sapiens GN=VDAC2 PE=2 SV=1;>tr|Q5JSD1|Q5JSD1_HUMAN VoLtage-dep	0.95434
Putative ubiquitin-conjugating enzyme E2 N-like;Ubiquitin-conjugating enzyme E2 N	UBE2NL;UBE2N	>sp|Q5JXB2|UE2NL_HUMAN Putative ubiquitin-conjugating enzyme E2 N-Like OS=Homo sapiens GN=UBE2NL PE=1 SV=1;>tr|F8VV71|F8VV71_HUMAN Ubiquitin-conjugating enzyme E2 N OS=Homo sapiens GN=UBE2N PE=2 SV=1;>sp|P61088|UBE2N_HUMAN Ubiquitin-conjugating enzyme E2 N	0.95465
Stomatin-like protein 2	STOML2	>sp|Q9UJZ1|STML2_HUMAN Stomatin-Like protein 2, mitochondriaL OS=Homo sapiens GN=STOML2 PE=1 SV=1;>tr|B4E1K7|B4E1K7_HUMAN Stomatin-Like protein 2, mitochondriaL OS=Homo sapiens GN=STOML2 PE=2 SV=1	0.95506
60S ribosomal protein L12	RPL12	>tr|Q59FI9|Q59FI9_HUMAN RibosomaL protein L12 variant (Fragment) OS=Homo sapiens PE=2 SV=1;>sp|P30050|RL12_HUMAN 60S ribosomaL protein L12 OS=Homo sapiens GN=RPL12 PE=1 SV=1	0.9581
Guanine nucleotide-binding protein subunit beta-2-like 1	GNB2L1	>tr|D6REE5|D6REE5_HUMAN Guanine nucLeotide-binding protein subunit beta-2-Like 1 (Fragment) OS=Homo sapiens GN=GNB2L1 PE=2 SV=1;>tr|E9KL35|E9KL35_HUMAN Epididymis tissue sperm binding protein Li 3a OS=Homo sapiens PE=2 SV=1;>sp|P63244|GBLP_HUMAN Guanine nu	0.95811
	KAT5	>tr|E9PRL6|E9PRL6_HUMAN Histone acetyLtransferase KAT5 (Fragment) OS=Homo sapiens GN=KAT5 PE=2 SV=1;>tr|E9PRM3|E9PRM3_HUMAN Histone acetyLtransferase KAT5 (Fragment) OS=Homo sapiens GN=KAT5 PE=2 SV=1	0.95953
Transmembrane emp24 domain-containing protein 9	TMED9	>sp|Q9BVK6|TMED9_HUMAN Transmembrane emp24 domain-containing protein 9 OS=Homo sapiens GN=TMED9 PE=1 SV=2;>tr|B2R8A2|B2R8A2_HUMAN cDNA, FLJ93804, highLy simiLar to Homo sapiens gp25L2 protein (HSGP25L2G), mRNA OS=Homo sapiens PE=2 SV=1	0.95954
Proactivator polypeptide;Saposin-A;Saposin-B-Val;Saposin-B;Saposin-C;Saposin-D	PSAP	>tr|B1AVU8|B1AVU8_HUMAN Saposin-D OS=Homo sapiens GN=PSAP PE=2 SV=1;>tr|Q59EN5|Q59EN5_HUMAN Prosaposin variant (Fragment) OS=Homo sapiens PE=2 SV=1;>tr|C9JIZ6|C9JIZ6_HUMAN PuLmonary surfactant-associated protein A2 OS=Homo sapiens GN=PSAP PE=2 SV=1;>sp|P07	0.95988
Splicing factor 3A subunit 1	SF3A1	>sp|Q15459|SF3A1_HUMAN SpLicing factor 3A subunit 1 OS=Homo sapiens GN=SF3A1 PE=1 SV=1;>tr|B4E091|B4E091_HUMAN cDNA FLJ55438, highLy simiLar to SpLicing factor 3 subunit 1 OS=Homo sapiens PE=2 SV=1	0.96069
Tubulin alpha-1B chain;Tubulin alpha-1A chain;Tubulin alpha-1C chain;Tubulin alpha-4A chain;Tubulin alpha-3C/D chain;Tubulin alpha-3E chain;Tubulin alpha-8 chain	TUBA1B;TUBA1A;TUBA1C;TUBA4A;TUBA3C;TUBA2;TUBA3E;DKFZp686L04275;TUBA8	>sp|P68363|TBA1B_HUMAN TubuLin aLpha-1B chain OS=Homo sapiens GN=TUBA1B PE=1 SV=1;>tr|B3KT06|B3KT06_HUMAN cDNA FLJ37398 fis, cLone BRAMY2027467, highLy simiLar to TubuLin aLpha-ubiquitous chain OS=Homo sapiens PE=2 SV=1;>tr|A8JZY9|A8JZY9_HUMAN cDNA FLJ7858	0.96106
Polyubiquitin-C;Ubiquitin;Polyubiquitin-B;Ubiquitin;Ubiquitin-40S ribosomal protein S27a;Ubiquitin;40S ribosomal protein S27a;Ubiquitin-60S ribosomal protein L40;Ubiquitin;60S ribosomal protein L40	UBC;DKFZp434K0435;UBB;RPS27A;UBA52	>tr|Q59EM9|Q59EM9_HUMAN Ubiquitin C variant (Fragment) OS=Homo sapiens PE=2 SV=1;>tr|Q66K58|Q66K58_HUMAN Uncharacterized protein (Fragment) OS=Homo sapiens PE=2 SV=1;>tr|L8B4J3|L8B4J3_HUMAN Ubiquitin C OS=Homo sapiens GN=UbC PE=4 SV=1;>tr|L8B4M0|L8B4M0_HUM	0.96166
Tubulin beta chain;Tubulin beta-2A chain;Tubulin beta-2B chain	TUBB;TUBB2A;TUBB2B;DKFZp566F223;XTP3TPATP1	>sp|P07437|TBB5_HUMAN TubuLin beta chain OS=Homo sapiens GN=TUBB PE=1 SV=2;>tr|Q5SU16|Q5SU16_HUMAN Beta 5-tubuLin OS=Homo sapiens GN=TUBB PE=2 SV=1;>tr|Q5JP53|Q5JP53_HUMAN TubuLin beta chain OS=Homo sapiens GN=TUBB PE=3 SV=1;>tr|B7ZAF0|B7ZAF0_HUMAN cDNA, F	0.96203
RNA-binding motif protein, X chromosome;RNA-binding motif protein, X chromosome, N-terminally processed;RNA binding motif protein, X-linked-like-1;RNA binding motif protein, X-linked-like-1, N-terminally processed	RBMX;RBMXL1	>sp|P38159|RBMX_HUMAN RNA-binding motif protein, X chromosome OS=Homo sapiens GN=RBMX PE=1 SV=3;>sp|Q96E39|RMXL1_HUMAN RNA binding motif protein, X-Linked-Like-1 OS=Homo sapiens GN=RBMXL1 PE=1 SV=1;>tr|Q2VIN3|Q2VIN3_HUMAN RBM1 (Fragment) OS=Homo sapiens PE	0.96215
6-phosphogluconate dehydrogenase, decarboxylating	PGD	>sp|P52209|6PGD_HUMAN 6-phosphogLuconate dehydrogenase, decarboxyLating OS=Homo sapiens GN=PGD PE=1 SV=3;>tr|B4DQJ8|B4DQJ8_HUMAN 6-phosphogLuconate dehydrogenase, decarboxyLating OS=Homo sapiens GN=PGD PE=2 SV=1;>tr|B4E2U0|B4E2U0_HUMAN 6-phosphogLuconate d	0.9635
Non-specific lipid-transfer protein	SCP2	>tr|B2R761|B2R761_HUMAN cDNA, FLJ93299, highLy simiLar to Homo sapiens steroL carrier protein 2 (SCP2), mRNA OS=Homo sapiens PE=2 SV=1;>sp|P22307|NLTP_HUMAN Non-specific Lipid-transfer protein OS=Homo sapiens GN=SCP2 PE=1 SV=2;>tr|H0YF61|H0YF61_HUMAN Non-s	0.96443
T-complex protein 1 subunit alpha	TCP1	>sp|P17987|TCPA_HUMAN T-compLex protein 1 subunit aLpha OS=Homo sapiens GN=TCP1 PE=1 SV=1;>tr|E7ERF2|E7ERF2_HUMAN T-compLex protein 1 subunit aLpha OS=Homo sapiens GN=TCP1 PE=2 SV=1;>tr|E7EQR6|E7EQR6_HUMAN T-compLex protein 1 subunit aLpha OS=Homo sapiens	0.96594
Serine/arginine-rich splicing factor 3	SFRS3;SRSF3	>tr|B2R6F3|B2R6F3_HUMAN SpLicing factor arginine/serine-rich 3 OS=Homo sapiens GN=SFRS3 PE=2 SV=1;>sp|P84103|SRSF3_HUMAN Serine/arginine-rich spLicing factor 3 OS=Homo sapiens GN=SRSF3 PE=1 SV=1;>tr|B4E241|B4E241_HUMAN Serine/arginine-rich-spLicing factor	0.96604
Neutral alpha-glucosidase AB	GANAB	>tr|B4DJ30|B4DJ30_HUMAN cDNA FLJ61290, highLy simiLar to NeutraL aLpha-gLucosidase AB OS=Homo sapiens PE=2 SV=1;>sp|Q14697|GANAB_HUMAN NeutraL aLpha-gLucosidase AB OS=Homo sapiens GN=GANAB PE=1 SV=3;>tr|B4DSM6|B4DSM6_HUMAN cDNA FLJ54057, highLy simiLar to	0.96799
60S ribosomal protein L9	RPL9	>sp|P32969|RL9_HUMAN 60S ribosomaL protein L9 OS=Homo sapiens GN=RPL9 PE=1 SV=1;>tr|Q53Z07|Q53Z07_HUMAN NPC-A-16 OS=Homo sapiens GN=RPL9 PE=2 SV=1;>tr|D6RAN4|D6RAN4_HUMAN 60S ribosomaL protein L9 (Fragment) OS=Homo sapiens GN=RPL9 PE=2 SV=1;>tr|B4DLV8|B4DL	0.96818
Protein phosphatase 1G	PPM1G	>tr|B2R665|B2R665_HUMAN cDNA, FLJ92810, highLy simiLar to Homo sapiens protein phosphatase 1G (formerLy 2C), magnesium-dependent, gamma isoform (PPM1G), mRNA OS=Homo sapiens PE=2 SV=1;>sp|O15355|PPM1G_HUMAN Protein phosphatase 1G OS=Homo sapiens GN=PPM1G P	0.96876
ELAV-like protein 1	ELAVL1	>tr|B4DVB8|B4DVB8_HUMAN ELAV-Like protein 1 OS=Homo sapiens GN=ELAVL1 PE=2 SV=1;>sp|Q15717|ELAV1_HUMAN ELAV-Like protein 1 OS=Homo sapiens GN=ELAVL1 PE=1 SV=2;>tr|M0QZR9|M0QZR9_HUMAN ELAV-Like protein 1 OS=Homo sapiens GN=ELAVL1 PE=4 SV=1	0.96887
T-complex protein 1 subunit eta	CCT7	>tr|Q53HV2|Q53HV2_HUMAN Chaperonin containing TCP1, subunit 7 (Eta) variant (Fragment) OS=Homo sapiens PE=2 SV=1;>tr|Q6IBT3|Q6IBT3_HUMAN CCT7 protein OS=Homo sapiens GN=CCT7 PE=2 SV=1;>sp|Q99832|TCPH_HUMAN T-compLex protein 1 subunit eta OS=Homo sapiens GN	0.96946
	HDAC4	>tr|B7Z8G5|B7Z8G5_HUMAN cDNA FLJ51174, highLy simiLar to Histone deacetyLase 4 OS=Homo sapiens PE=2 SV=1;>tr|B7Z8I2|B7Z8I2_HUMAN cDNA FLJ59806, highLy simiLar to Histone deacetyLase 4 OS=Homo sapiens PE=2 SV=1;>tr|F5H5W4|F5H5W4_HUMAN Histone deacetyLase 4	0.96957
		>tr|I3L4T2|I3L4T2_HUMAN Misshapen-Like kinase 1 OS=Homo sapiens GN=MINK1 PE=2 SV=1	0.97103
60S ribosomal protein L10	RPL10	>sp|P27635|RL10_HUMAN 60S ribosomaL protein L10 OS=Homo sapiens GN=RPL10 PE=1 SV=4;>tr|F8W7C6|F8W7C6_HUMAN 60S ribosomaL protein L10 OS=Homo sapiens GN=RPL10 PE=2 SV=1	0.97145
GTP-binding protein SAR1a;GTP-binding protein SAR1b	SAR1A;SARA1;SAR1B	>tr|B2R679|B2R679_HUMAN cDNA, FLJ92825, highLy simiLar to Homo sapiens SAR1a gene homoLog 1 (S. cerevisiae) (SARA1), mRNA OS=Homo sapiens PE=2 SV=1;>tr|Q53F37|Q53F37_HUMAN SAR1a gene homoLog 2 variant (Fragment) OS=Homo sapiens PE=2 SV=1;>tr|Q5SQT9|Q5SQT9_	0.97208
40S ribosomal protein S3	RPS3	>sp|P23396|RS3_HUMAN 40S ribosomaL protein S3 OS=Homo sapiens GN=RPS3 PE=1 SV=2;>tr|Q53G83|Q53G83_HUMAN RibosomaL protein S3 variant (Fragment) OS=Homo sapiens PE=2 SV=1;>tr|E9PL09|E9PL09_HUMAN 40S ribosomaL protein S3 OS=Homo sapiens GN=RPS3 PE=2 SV=1;>tr	0.97211
rRNA/tRNA 2-O-methyltransferase fibrillarin-like protein 1	FBLL1	>tr|R4GMW7|R4GMW7_HUMAN rRNA/tRNA 2-O-methyLtransferase fibriLLarin-Like protein 1 OS=Homo sapiens GN=FBLL1 PE=4 SV=1;>sp|A6NHQ2|FBLL1_HUMAN rRNA/tRNA 2-O-methyLtransferase fibriLLarin-Like protein 1 OS=Homo sapiens GN=FBLL1 PE=1 SV=1	0.97241
T-complex protein 1 subunit zeta	CCT6A	>tr|B2R9K8|B2R9K8_HUMAN cDNA, FLJ94440, highLy simiLar to Homo sapiens chaperonin containing TCP1, subunit 6A (zeta 1)(CCT6A), mRNA OS=Homo sapiens PE=2 SV=1;>sp|P40227|TCPZ_HUMAN T-compLex protein 1 subunit zeta OS=Homo sapiens GN=CCT6A PE=1 SV=3;>tr|Q59E	0.97278
Probable ATP-dependent RNA helicase DDX6	DDX6	>sp|P26196|DDX6_HUMAN ProbabLe ATP-dependent RNA heLicase DDX6 OS=Homo sapiens GN=DDX6 PE=1 SV=2;>tr|B2R858|B2R858_HUMAN cDNA, FLJ93750, Homo sapiens DEAD (Asp-GLu-ALa-Asp) box poLypeptide 6 (DDX6), mRNA OS=Homo sapiens PE=2 SV=1;>tr|Q8IV96|Q8IV96_HUMAN DD	0.97344
Sorting nexin-1;Sorting nexin-2	SNX1;SNX2	>sp|Q13596|SNX1_HUMAN Sorting nexin-1 OS=Homo sapiens GN=SNX1 PE=1 SV=3;>tr|Q53GY8|Q53GY8_HUMAN Sorting nexin 1 isoform a variant (Fragment) OS=Homo sapiens PE=2 SV=1;>tr|Q53HL9|Q53HL9_HUMAN Sorting nexin 1 isoform a variant (Fragment) OS=Homo sapiens PE=2	0.97444
Serine/arginine-rich splicing factor 1	SRSF1	>tr|J3KTL2|J3KTL2_HUMAN Serine/arginine-rich-spLicing factor 1 OS=Homo sapiens GN=SRSF1 PE=4 SV=1;>sp|Q07955|SRSF1_HUMAN Serine/arginine-rich spLicing factor 1 OS=Homo sapiens GN=SRSF1 PE=1 SV=2;>tr|A8K1L8|A8K1L8_HUMAN cDNA FLJ77645, highLy simiLar to Homo	0.97547
Putative RNA-binding protein Luc7-like 2	LUC7L2	>tr|B3KSL5|B3KSL5_HUMAN cDNA FLJ36545 fis, cLone TRACH2006670, highLy simiLar to RNA-binding protein Luc7-Like 2 OS=Homo sapiens PE=2 SV=1;>sp|Q9Y383|LC7L2_HUMAN Putative RNA-binding protein Luc7-Like 2 OS=Homo sapiens GN=LUC7L2 PE=1 SV=2;>tr|B3KRR1|B3KRR1	0.9756
40S ribosomal protein S12	RPS12	>sp|P25398|RS12_HUMAN 40S ribosomaL protein S12 OS=Homo sapiens GN=RPS12 PE=1 SV=3	0.97739
Ras-related protein Rab-1A;Putative Ras-related protein Rab-1C;Ras-related protein Rab-1B;Ras-related protein Rab-15;Ras-related protein Rab-8B;Ras-related protein Rab-13	RAB1A;RAB1B;RAB1C;RAB13;RAB15;RAB8B;hCG_1996054;RAB10	>sp|P62820|RAB1A_HUMAN Ras-reLated protein Rab-1A OS=Homo sapiens GN=RAB1A PE=1 SV=3;>tr|Q5U0I6|Q5U0I6_HUMAN RAB1A protein OS=Homo sapiens GN=RAB1A PE=2 SV=1;>tr|Q6FIG4|Q6FIG4_HUMAN RAB1B protein OS=Homo sapiens GN=RAB1B PE=2 SV=1;>sp|Q92928|RAB1C_HUMAN Pu	0.97861
Non-POU domain-containing octamer-binding protein	NONO	>tr|A8K525|A8K525_HUMAN cDNA FLJ76817, highLy simiLar to Homo sapiens non-POU domain containing, octamer-binding (NONO), mRNA OS=Homo sapiens PE=2 SV=1;>sp|Q15233|NONO_HUMAN Non-POU domain-containing octamer-binding protein OS=Homo sapiens GN=NONO PE=1 SV=	0.97909
60 kDa heat shock protein, mitochondrial	HSPD1	>sp|P10809|CH60_HUMAN 60 kDa heat shock protein, mitochondriaL OS=Homo sapiens GN=HSPD1 PE=1 SV=2;>tr|B3GQS7|B3GQS7_HUMAN MitochondriaL heat shock 60kD protein 1 variant 1 OS=Homo sapiens GN=HSPD1 PE=2 SV=1;>tr|B7Z597|B7Z597_HUMAN cDNA FLJ54373, highLy sim	0.98084
Ubiquitin-conjugating enzyme E2 L3	UBE2L3	>tr|A8K4W8|A8K4W8_HUMAN cDNA FLJ77917, highLy simiLar to Homo sapiens ubiquitin-conjugating enzyme E2L 3 (UBE2L3), transcript variant 1, mRNA OS=Homo sapiens PE=2 SV=1;>sp|P68036|UB2L3_HUMAN Ubiquitin-conjugating enzyme E2 L3 OS=Homo sapiens GN=UBE2L3 PE=1	0.9811
Myosin-10	MYH10	>tr|F8W6L6|F8W6L6_HUMAN Myosin-10 OS=Homo sapiens GN=MYH10 PE=2 SV=1;>tr|B2RWP9|B2RWP9_HUMAN MYH10 protein OS=Homo sapiens GN=MYH10 PE=2 SV=1;>sp|P35580|MYH10_HUMAN Myosin-10 OS=Homo sapiens GN=MYH10 PE=1 SV=3;>tr|D3DTS1|D3DTS1_HUMAN Myosin, heavy poLypept	0.98295
Protein DEK	DEK	>sp|P35659|DEK_HUMAN Protein DEK OS=Homo sapiens GN=DEK PE=1 SV=1;>tr|B4DNW3|B4DNW3_HUMAN cDNA FLJ51914, highLy simiLar to Protein DEK OS=Homo sapiens PE=2 SV=1;>tr|B4DFG0|B4DFG0_HUMAN Protein DEK OS=Homo sapiens GN=DEK PE=2 SV=1	0.98502
CD44 antigen	CD44	>sp|P16070|CD44_HUMAN CD44 antigen OS=Homo sapiens GN=CD44 PE=1 SV=3;>tr|E7EPC6|E7EPC6_HUMAN CD44 antigen OS=Homo sapiens GN=CD44 PE=2 SV=2;>tr|A8K309|A8K309_HUMAN cDNA FLJ76654, highLy simiLar to Homo sapiens CD44 antigen (homing function and Indian bLood	0.98555
Valine--tRNA ligase	VARS	>tr|B0V043|B0V043_HUMAN VaLine--tRNA Ligase OS=Homo sapiens GN=VARS PE=2 SV=1;>sp|P26640|SYVC_HUMAN VaLine--tRNA Ligase OS=Homo sapiens GN=VARS PE=1 SV=4;>tr|Q5SP20|Q5SP20_HUMAN VaLine--tRNA Ligase (Fragment) OS=Homo sapiens GN=VARS PE=2 SV=1;>tr|A2ABF4|A2	0.98558
Phosphate carrier protein, mitochondrial	SLC25A3	>sp|Q00325|MPCP_HUMAN Phosphate carrier protein, mitochondriaL OS=Homo sapiens GN=SLC25A3 PE=1 SV=2;>tr|B2RE88|B2RE88_HUMAN cDNA, FLJ96465, highLy simiLar to Homo sapiens soLute carrier famiLy 25 (mitochondriaL carrier;phosphate carrier), member 3 (SLC25A3	0.98581
Transcription elongation factor A protein 1;Transcription elongation factor A protein 2	TCEA1;TCEA2	>sp|P23193|TCEA1_HUMAN Transcription eLongation factor A protein 1 OS=Homo sapiens GN=TCEA1 PE=1 SV=2;>tr|B7Z4S1|B7Z4S1_HUMAN Transcription eLongation factor A protein 1 OS=Homo sapiens GN=TCEA1 PE=4 SV=1;>sp|Q15560|TCEA2_HUMAN Transcription eLongation fac	0.98645
Ubiquilin-2	UBQLN2	>sp|Q9UHD9|UBQL2_HUMAN UbiquiLin-2 OS=Homo sapiens GN=UBQLN2 PE=1 SV=2;>tr|B4DZF1|B4DZF1_HUMAN cDNA FLJ56541, highLy simiLar to UbiquiLin-2 OS=Homo sapiens PE=2 SV=1;>tr|B4DM19|B4DM19_HUMAN cDNA FLJ60127, highLy simiLar to UbiquiLin-2 OS=Homo sapiens PE=2	0.99197
		>gi|CON_TRY1_BOVIN|SWISS-PROT:P00760 Cationic trypsin precursor (EC 3.4.21.4) (Beta-trypsin) [Contains: ALpha-trypsin chain 1; ALpha-trypsin chain 2] (Fragment) Reagent	0.99318
Hypoxanthine-guanine phosphoribosyltransferase	HPRT1	>sp|P00492|HPRT_HUMAN Hypoxanthine-guanine phosphoribosyLtransferase OS=Homo sapiens GN=HPRT1 PE=1 SV=2;>tr|Q6LET3|Q6LET3_HUMAN HPRT1 protein (Fragment) OS=Homo sapiens GN=HPRT1 PE=2 SV=1	0.99393
U1 small nuclear ribonucleoprotein 70 kDa	SNRNP70;DKFZp434N041	>tr|A8KAQ5|A8KAQ5_HUMAN cDNA FLJ77404, highLy simiLar to Homo sapiens smaLL nucLear ribonucLeoprotein 70kDa poLypeptide (RNP antigen) (SNRP70), transcript variant 1, mRNA OS=Homo sapiens PE=2 SV=1;>sp|P08621|RU17_HUMAN U1 smaLL nucLear ribonucLeoprotein 70	0.99761
HLA class I histocompatibility antigen, Cw-17 alpha chain;HLA class I histocompatibility antigen, Cw-7 alpha chain;HLA class I histocompatibility antigen, Cw-2 alpha chain;HLA class I histocompatibility antigen, Cw-8 alpha chain;HLA class I histocompatibility antigen, Cw-12 alpha chain;HLA class I histocompatibility antigen, Cw-15 alpha chain;HLA class I histocompatibility antigen, Cw-16 alpha ch…	HLA-C;HLA-Cw;HLA-A;HLA-A*02;HLA-A24AK;HLA-A*33;HLA-A*0226;HLA-B;MHC class I HLA-A;HLA-H;HLA;Cw;HLA-A*0201V3	>tr|F5GXA6|F5GXA6_HUMAN HLA cLass I histocompatibiLity antigen, Cw-14 aLpha chain OS=Homo sapiens GN=HLA-C PE=2 SV=1;>tr|B4DVY0|B4DVY0_HUMAN cDNA FLJ54183, highLy simiLar to HLA cLass I histocompatibiLity antigen, Cw-7 aLpha chain OS=Homo sapiens PE=2 SV=1	0.99828
DNA-dependent protein kinase catalytic subunit	PRKDC	>sp|P78527|PRKDC_HUMAN DNA-dependent protein kinase cataLytic subunit OS=Homo sapiens GN=PRKDC PE=1 SV=3;>tr|E7EUY0|E7EUY0_HUMAN DNA-dependent protein kinase cataLytic subunit OS=Homo sapiens GN=PRKDC PE=2 SV=1	0.99884
60S ribosomal protein L6	RPL6	>tr|Q9HBB3|Q9HBB3_HUMAN 60S ribosomaL protein L6 OS=Homo sapiens PE=2 SV=1;>sp|Q02878|RL6_HUMAN 60S ribosomaL protein L6 OS=Homo sapiens GN=RPL6 PE=1 SV=3;>tr|Q8N5Z7|Q8N5Z7_HUMAN 60S ribosomaL protein L6 OS=Homo sapiens GN=RPL6 PE=2 SV=1;>tr|Q8TBK5|Q8TBK5_	0.99916
Heterogeneous nuclear ribonucleoproteins A2/B1	HNRNPA2B1	>sp|P22626|ROA2_HUMAN Heterogeneous nucLear ribonucLeoproteins A2/B1 OS=Homo sapiens GN=HNRNPA2B1 PE=1 SV=2;>tr|I6L957|I6L957_HUMAN HNRNPA2B1 protein OS=Homo sapiens GN=HNRNPA2B1 PE=2 SV=1	0.99939
Spectrin alpha chain, brain	SPTAN1;DKFZp564P0562	>tr|A6NG51|A6NG51_HUMAN Spectrin aLpha chain, non-erythrocytic 1 OS=Homo sapiens GN=SPTAN1 PE=2 SV=2;>sp|Q13813|SPTN1_HUMAN Spectrin aLpha chain, non-erythrocytic 1 OS=Homo sapiens GN=SPTAN1 PE=1 SV=3;>tr|Q9UG16|Q9UG16_HUMAN Putative uncharacterized protei	1.0025
Heterogeneous nuclear ribonucleoprotein A/B	HNRNPAB	>tr|Q53F64|Q53F64_HUMAN Heterogeneous nucLear ribonucLeoprotein AB isoform a variant (Fragment) OS=Homo sapiens PE=2 SV=1;>sp|Q99729|ROAA_HUMAN Heterogeneous nucLear ribonucLeoprotein A/B OS=Homo sapiens GN=HNRNPAB PE=1 SV=2;>tr|D6RBZ0|D6RBZ0_HUMAN Heterog	1.0026
60S ribosomal protein L5	RPL5	>tr|Q59GX9|Q59GX9_HUMAN RibosomaL protein L5 variant (Fragment) OS=Homo sapiens PE=2 SV=1;>tr|A2RUM7|A2RUM7_HUMAN RibosomaL protein L5 OS=Homo sapiens GN=RPL5 PE=2 SV=1;>sp|P46777|RL5_HUMAN 60S ribosomaL protein L5 OS=Homo sapiens GN=RPL5 PE=1 SV=3;>tr|B3K	1.0044
Putative pre-mRNA-splicing factor ATP-dependent RNA helicase DHX15	DHX15	>sp|O43143|DHX15_HUMAN Putative pre-mRNA-spLicing factor ATP-dependent RNA heLicase DHX15 OS=Homo sapiens GN=DHX15 PE=1 SV=2;>tr|B4E0S6|B4E0S6_HUMAN cDNA FLJ55635, highLy simiLar to pre-mRNA-spLicing factorATP-dependent RNA heLicase DHX15 (EC 3.6.1.-) OS=H	1.0044
Leukocyte surface antigen CD47	CD47	>sp|Q08722|CD47_HUMAN Leukocyte surface antigen CD47 OS=Homo sapiens GN=CD47 PE=1 SV=1	1.0044
Dolichyl-diphosphooligosaccharide--protein glycosyltransferase subunit 2	RPN2	>tr|B2RE46|B2RE46_HUMAN cDNA, FLJ96923, highLy simiLar to Homo sapiens ribophorin II (RPN2), mRNA OS=Homo sapiens PE=2 SV=1;>sp|P04844|RPN2_HUMAN DoLichyL-diphosphooLigosaccharide--protein gLycosyLtransferase subunit 2 OS=Homo sapiens GN=RPN2 PE=1 SV=3;>tr	1.0047
Polypyrimidine tract-binding protein 1;Polypyrimidine tract-binding protein 3	PTBP1;PTBP3	>sp|P26599|PTBP1_HUMAN PoLypyrimidine tract-binding protein 1 OS=Homo sapiens GN=PTBP1 PE=1 SV=1;>sp|O95758|PTBP3_HUMAN PoLypyrimidine tract-binding protein 3 OS=Homo sapiens GN=PTBP3 PE=1 SV=2;>tr|K7EK45|K7EK45_HUMAN PoLypyrimidine tract-binding protein 1	1.0047
Rho GDP-dissociation inhibitor 1	ARHGDIA	>tr|J3QQX2|J3QQX2_HUMAN Rho GDP-dissociation inhibitor 1 OS=Homo sapiens GN=ARHGDIA PE=4 SV=1;>sp|P52565|GDIR1_HUMAN Rho GDP-dissociation inhibitor 1 OS=Homo sapiens GN=ARHGDIA PE=1 SV=3;>tr|J3KTF8|J3KTF8_HUMAN Rho GDP-dissociation inhibitor 1 (Fragment) O	1.0071
Chromobox protein homolog 1	CBX1	>sp|P83916|CBX1_HUMAN Chromobox protein homoLog 1 OS=Homo sapiens GN=CBX1 PE=1 SV=1;>tr|Q6IBN6|Q6IBN6_HUMAN CBX1 protein OS=Homo sapiens GN=CBX1 PE=2 SV=1;>tr|J3KS05|J3KS05_HUMAN Chromobox protein homoLog 1 (Fragment) OS=Homo sapiens GN=CBX1 PE=4 SV=1;>tr|	1.0078
Citrate synthase, mitochondrial;Citrate synthase	CS	>sp|O75390|CISY_HUMAN Citrate synthase, mitochondriaL OS=Homo sapiens GN=CS PE=1 SV=2;>tr|B4DJV2|B4DJV2_HUMAN Citrate synthase OS=Homo sapiens GN=CS PE=2 SV=1;>tr|B3KTN4|B3KTN4_HUMAN Citrate synthase OS=Homo sapiens PE=2 SV=1;>tr|F8W4S1|F8W4S1_HUMAN Citrat	1.0082
Heterogeneous nuclear ribonucleoprotein Q	SYNCRIP	>tr|B2R8Z8|B2R8Z8_HUMAN cDNA, FLJ94136, highLy simiLar to Homo sapiens synaptotagmin binding, cytopLasmic RNA interacting protein (SYNCRIP), mRNA OS=Homo sapiens PE=2 SV=1;>sp|O60506|HNRPQ_HUMAN Heterogeneous nucLear ribonucLeoprotein Q OS=Homo sapiens GN=	1.0094
Tubulin beta-4B chain	TUBB4B;TUBB2C	>sp|P68371|TBB4B_HUMAN TubuLin beta-4B chain OS=Homo sapiens GN=TUBB4B PE=1 SV=1;>tr|Q8IWP6|Q8IWP6_HUMAN CLass IVb beta tubuLin OS=Homo sapiens PE=2 SV=1;>tr|Q8IZ29|Q8IZ29_HUMAN TubuLin, beta 2C OS=Homo sapiens GN=TUBB2C PE=2 SV=1;>tr|Q8N6N5|Q8N6N5_HUMAN T	1.0101
Vacuolar protein sorting-associated protein 35	VPS35;DKFZp686O2462	>tr|Q53FR4|Q53FR4_HUMAN VacuoLar protein sorting 35 variant (Fragment) OS=Homo sapiens PE=2 SV=1;>sp|Q96QK1|VPS35_HUMAN VacuoLar protein sorting-associated protein 35 OS=Homo sapiens GN=VPS35 PE=1 SV=2;>tr|Q5HYM2|Q5HYM2_HUMAN Putative uncharacterized prote	1.0101
		>sp|Q8NAT2|TDRD5_HUMAN Tudor domain-containing protein 5 OS=Homo sapiens GN=TDRD5 PE=1 SV=3	1.0107
Ribose-phosphate pyrophosphokinase;Ribose-phosphate pyrophosphokinase 2;Ribose-phosphate pyrophosphokinase 1;Ribose-phosphate pyrophosphokinase 3	PRPS2;PRPS1;PRPS1L1	>tr|B2R860|B2R860_HUMAN Ribose-phosphate pyrophosphokinase OS=Homo sapiens PE=2 SV=1;>sp|P11908|PRPS2_HUMAN Ribose-phosphate pyrophosphokinase 2 OS=Homo sapiens GN=PRPS2 PE=1 SV=2;>tr|B2R6T7|B2R6T7_HUMAN Ribose-phosphate pyrophosphokinase OS=Homo sapiens P	1.0119
Delta(3,5)-Delta(2,4)-dienoyl-CoA isomerase, mitochondrial	ECH1	>sp|Q13011|ECH1_HUMAN DeLta(3,5)-DeLta(2,4)-dienoyL-CoA isomerase, mitochondriaL OS=Homo sapiens GN=ECH1 PE=1 SV=2	1.0121
Translocon-associated protein subunit delta	SSR4	>sp|P51571|SSRD_HUMAN TransLocon-associated protein subunit deLta OS=Homo sapiens GN=SSR4 PE=1 SV=1;>tr|A6NLM8|A6NLM8_HUMAN TransLocon-associated protein subunit deLta OS=Homo sapiens GN=SSR4 PE=2 SV=1;>tr|H7C1C6|H7C1C6_HUMAN TransLocon-associated protein	1.0133
Eukaryotic initiation factor 4A-III	EIF4A3	>sp|P38919|IF4A3_HUMAN Eukaryotic initiation factor 4A-III OS=Homo sapiens GN=EIF4A3 PE=1 SV=4;>tr|I3L3H2|I3L3H2_HUMAN Eukaryotic initiation factor 4A-III (Fragment) OS=Homo sapiens GN=EIF4A3 PE=2 SV=1	1.0142
Rho-related GTP-binding protein RhoG	RHOG;ARHG	>sp|P84095|RHOG_HUMAN Rho-reLated GTP-binding protein RhoG OS=Homo sapiens GN=RHOG PE=1 SV=1;>tr|Q6ICQ8|Q6ICQ8_HUMAN ARHG protein (Fragment) OS=Homo sapiens GN=ARHG PE=2 SV=1	1.0166
Proteasome subunit alpha type;Proteasome subunit alpha type-6	PSMA6	>tr|G3V5Z7|G3V5Z7_HUMAN Proteasome subunit aLpha type OS=Homo sapiens GN=PSMA6 PE=2 SV=1;>sp|P60900|PSA6_HUMAN Proteasome subunit aLpha type-6 OS=Homo sapiens GN=PSMA6 PE=1 SV=1;>tr|B4DXJ9|B4DXJ9_HUMAN Proteasome (Prosome, macropain) subunit, aLpha type, 6	1.0168
Vitronectin;Vitronectin V65 subunit;Vitronectin V10 subunit;Somatomedin-B	VTN	>Q3ZBS7 TREMBL:Q3ZBS7 (Bos taurus) Vitronectin;>gi|CON_IPI00712934.1|TREMBL:Q3ZBS7 (Bos taurus) Vitronectin;>tr|D9ZGG2|D9ZGG2_HUMAN Vitronectin OS=Homo sapiens GN=VTN PE=2 SV=1;>sp|P04004|VTNC_HUMAN Vitronectin OS=Homo sapiens GN=VTN PE=1 SV=1;>tr|B7Z553|B	1.0189
Nucleophosmin	NPM1	>sp|P06748|NPM_HUMAN NucLeophosmin OS=Homo sapiens GN=NPM1 PE=1 SV=2;>tr|A4ZU86|A4ZU86_HUMAN Truncated nucLeoLar phosphoprotein B23 OS=Homo sapiens GN=NPM1 PE=2 SV=1	1.0197
Bifunctional purine biosynthesis protein PURH;Phosphoribosylaminoimidazolecarboxamide formyltransferase;IMP cyclohydrolase	ATIC	>tr|B2R7P8|B2R7P8_HUMAN cDNA, FLJ93545, highLy simiLar to Homo sapiens 5-aminoimidazoLe-4-carboxamide ribonucLeotide formyLtransferase/IMP cycLohydroLase (ATIC), mRNA OS=Homo sapiens PE=2 SV=1;>sp|P31939|PUR9_HUMAN BifunctionaL purine biosynthesis protein	1.0222
RuvB-like 2	RUVBL2	>sp|Q9Y230|RUVB2_HUMAN RuvB-Like 2 OS=Homo sapiens GN=RUVBL2 PE=1 SV=3;>tr|B3KNL2|B3KNL2_HUMAN RuvB-Like 2 (E. coLi), isoform CRA_d OS=Homo sapiens GN=RUVBL2 PE=2 SV=1;>tr|B3KQ59|B3KQ59_HUMAN RuvB-Like 2 OS=Homo sapiens GN=RUVBL2 PE=2 SV=1;>tr|M0R0Y3|M0R0Y	1.0226
Lupus La protein	SSB	>tr|B5BUB5|B5BUB5_HUMAN Autoantigen La (Fragment) OS=Homo sapiens GN=SSB PE=2 SV=1;>sp|P05455|LA_HUMAN Lupus La protein OS=Homo sapiens GN=SSB PE=1 SV=2;>tr|Q14730|Q14730_HUMAN La 4.1 protein (Fragment) OS=Homo sapiens PE=2 SV=1	1.023
High mobility group protein B1;Putative high mobility group protein B1-like 1	HMGB1;HMGB1P1;WUGSC:H_NH0244E06.1;hCG_1991922	>sp|P09429|HMGB1_HUMAN High mobiLity group protein B1 OS=Homo sapiens GN=HMGB1 PE=1 SV=3;>sp|B2RPK0|HGB1A_HUMAN Putative high mobiLity group protein B1-Like 1 OS=Homo sapiens GN=HMGB1P1 PE=5 SV=1;>tr|B3KQ05|B3KQ05_HUMAN cDNA FLJ32558 fis, cLone SPLEN100014	1.0269
Acidic leucine-rich nuclear phosphoprotein 32 family member E	ANP32E	>sp|Q9BTT0|AN32E_HUMAN Acidic Leucine-rich nucLear phosphoprotein 32 famiLy member E OS=Homo sapiens GN=ANP32E PE=1 SV=1;>tr|Q53F20|Q53F20_HUMAN Acidic (Leucine-rich) nucLear phosphoprotein 32 famiLy, member E variant (Fragment) OS=Homo sapiens PE=2 SV=1;>	1.0272
Ubiquitin-like modifier-activating enzyme 1	UBA1	>sp|P22314|UBA1_HUMAN Ubiquitin-Like modifier-activating enzyme 1 OS=Homo sapiens GN=UBA1 PE=1 SV=3;>tr|B4DL67|B4DL67_HUMAN cDNA FLJ53392, highLy simiLar to Ubiquitin-activating enzyme E1 OS=Homo sapiens PE=2 SV=1;>tr|B4DDE4|B4DDE4_HUMAN cDNA FLJ54582, hig	1.03
Stress-induced-phosphoprotein 1	STIP1	>tr|G3XAD8|G3XAD8_HUMAN Stress-induced-phosphoprotein 1 OS=Homo sapiens GN=STIP1 PE=4 SV=1;>tr|Q3ZCU9|Q3ZCU9_HUMAN STIP1 protein OS=Homo sapiens GN=STIP1 PE=2 SV=1;>tr|A8K690|A8K690_HUMAN cDNA FLJ76863, highLy simiLar to Homo sapiens stress-induced-phospho	1.0313
Glycylpeptide N-tetradecanoyltransferase 1;Glycylpeptide N-tetradecanoyltransferase	NMT1;NMT	>sp|P30419|NMT1_HUMAN GLycyLpeptide N-tetradecanoyLtransferase 1 OS=Homo sapiens GN=NMT1 PE=1 SV=2;>tr|Q96HI4|Q96HI4_HUMAN GLycyLpeptide N-tetradecanoyLtransferase (Fragment) OS=Homo sapiens GN=NMT1 PE=2 SV=2;>tr|B7Z8J4|B7Z8J4_HUMAN GLycyLpeptide N-tetrade	1.0329
L antigen family member 3	LAGE3	>sp|Q14657|LAGE3_HUMAN L antigen famiLy member 3 OS=Homo sapiens GN=LAGE3 PE=1 SV=2;>tr|B0S8I7|B0S8I7_HUMAN L antigen famiLy member 3 OS=Homo sapiens GN=LAGE3 PE=2 SV=1	1.0338
Calmodulin	CALM2;CALM1;CALM3	>tr|E7EMB3|E7EMB3_HUMAN CaLmoduLin OS=Homo sapiens GN=CALM2 PE=2 SV=1;>tr|H0Y7A7|H0Y7A7_HUMAN CaLmoduLin (Fragment) OS=Homo sapiens GN=CALM2 PE=2 SV=1;>tr|E7ETZ0|E7ETZ0_HUMAN CaLmoduLin OS=Homo sapiens GN=CALM1 PE=2 SV=1;>tr|B2RDW0|B2RDW0_HUMAN cDNA, FLJ96	1.0344
Adenylate kinase 2, mitochondrial	AK2	>sp|P54819|KAD2_HUMAN AdenyLate kinase 2, mitochondriaL OS=Homo sapiens GN=AK2 PE=1 SV=2;>tr|F8W1A4|F8W1A4_HUMAN AdenyLate kinase 2, mitochondriaL OS=Homo sapiens GN=AK2 PE=2 SV=1;>tr|F8VY04|F8VY04_HUMAN AdenyLate kinase 2, mitochondriaL OS=Homo sapiens GN	1.0362
Nuclear pore glycoprotein p62	NUP62	>sp|P37198|NUP62_HUMAN NucLear pore gLycoprotein p62 OS=Homo sapiens GN=NUP62 PE=1 SV=3;>tr|M0QXN5|M0QXN5_HUMAN NucLear pore gLycoprotein p62 OS=Homo sapiens GN=NUP62 PE=4 SV=1	1.0369
U2 small nuclear ribonucleoprotein A	SNRPA1	>sp|P09661|RU2A_HUMAN U2 smaLL nucLear ribonucLeoprotein A OS=Homo sapiens GN=SNRPA1 PE=1 SV=2;>tr|Q53G21|Q53G21_HUMAN SmaLL nucLear ribonucLeoprotein poLypeptide A variant (Fragment) OS=Homo sapiens PE=2 SV=1;>tr|Q53G61|Q53G61_HUMAN SmaLL nucLear ribonu	1.0385
Splicing factor 3B subunit 3	SF3B3	>tr|A8K6V3|A8K6V3_HUMAN cDNA FLJ78677, highLy simiLar to Homo sapiens spLicing factor 3b, subunit 3, 130kDa (SF3B3), mRNA OS=Homo sapiens PE=2 SV=1;>sp|Q15393|SF3B3_HUMAN SpLicing factor 3B subunit 3 OS=Homo sapiens GN=SF3B3 PE=1 SV=4;>tr|B3KQH1|B3KQH1_HUM	1.0387
Lamin-B1	LMNB1	>sp|P20700|LMNB1_HUMAN Lamin-B1 OS=Homo sapiens GN=LMNB1 PE=1 SV=2;>tr|E9PBF6|E9PBF6_HUMAN Lamin-B1 OS=Homo sapiens GN=LMNB1 PE=2 SV=1;>tr|Q6DC98|Q6DC98_HUMAN LMNB1 protein (Fragment) OS=Homo sapiens GN=LMNB1 PE=2 SV=1	1.0387
Dolichyl-diphosphooligosaccharide--protein glycosyltransferase subunit 1	RPN1	>sp|P04843|RPN1_HUMAN DoLichyL-diphosphooLigosaccharide--protein gLycosyLtransferase subunit 1 OS=Homo sapiens GN=RPN1 PE=1 SV=1;>tr|Q53EP4|Q53EP4_HUMAN Ribophorin I variant (Fragment) OS=Homo sapiens PE=2 SV=1;>tr|Q6IBR0|Q6IBR0_HUMAN RPN1 protein OS=Homo	1.0405
Putative tropomyosin alpha-3 chain-like protein	TPM3;DKFZp686J1372	>tr|B2RDE1|B2RDE1_HUMAN cDNA, FLJ96568, highLy simiLar to Homo sapiens tropomyosin 3 (TPM3), mRNA OS=Homo sapiens PE=2 SV=1;>tr|Q5VU58|Q5VU58_HUMAN Tropomyosin 3, isoform CRA_b OS=Homo sapiens GN=TPM3 PE=3 SV=1;>tr|Q8TCG3|Q8TCG3_HUMAN TPMsk3 (Fragment) OS=	1.041
Heterogeneous nuclear ribonucleoproteins C1/C2;Heterogeneous nuclear ribonucleoprotein C-like 1	HNRNPC;LOC440563;LOC649330;HNRNPCL1;HNRPCL1	>tr|G3V4C1|G3V4C1_HUMAN Heterogeneous nucLear ribonucLeoproteins C1/C2 OS=Homo sapiens GN=HNRNPC PE=2 SV=1;>tr|B2R5W2|B2R5W2_HUMAN cDNA, FLJ92657, highLy simiLar to Homo sapiens heterogeneous nucLear ribonucLeoprotein C (C1/C2) (HNRPC), transcript variant	1.0413
Peptidyl-prolyl cis-trans isomerase FKBP4;Peptidyl-prolyl cis-trans isomerase FKBP4, N-terminally processed;Peptidyl-prolyl cis-trans isomerase	FKBP4	>tr|B2R9U2|B2R9U2_HUMAN cDNA, FLJ94557, highLy simiLar to Homo sapiens FK506 binding protein 4, 59kDa (FKBP4), mRNA OS=Homo sapiens PE=2 SV=1;>sp|Q02790|FKBP4_HUMAN PeptidyL-proLyL cis-trans isomerase FKBP4 OS=Homo sapiens GN=FKBP4 PE=1 SV=3;>tr|F5H1U3|F5H	1.0418
Lamin-B2	LMNB2	>tr|J9JID7|J9JID7_HUMAN Lamin B2, isoform CRA_a OS=Homo sapiens GN=LMNB2 PE=3 SV=1;>sp|Q03252|LMNB2_HUMAN Lamin-B2 OS=Homo sapiens GN=LMNB2 PE=1 SV=3	1.0516
Serine hydroxymethyltransferase;Serine hydroxymethyltransferase, mitochondrial	SHMT2;DKFZp686P09201	>tr|B4DWA7|B4DWA7_HUMAN Serine hydroxymethyLtransferase OS=Homo sapiens PE=2 SV=1;>sp|P34897|GLYM_HUMAN Serine hydroxymethyLtransferase, mitochondriaL OS=Homo sapiens GN=SHMT2 PE=1 SV=3;>tr|Q53ET4|Q53ET4_HUMAN Serine hydroxymethyLtransferase (Fragment) OS=	1.0523
DnaJ homolog subfamily C member 8	DNAJC8	>sp|O75937|DNJC8_HUMAN DnaJ homoLog subfamiLy C member 8 OS=Homo sapiens GN=DNAJC8 PE=1 SV=2	1.0536
Scaffold attachment factor B1;Scaffold attachment factor B2	SAFB;SAFB2	>tr|A8K329|A8K329_HUMAN cDNA FLJ76656, highLy simiLar to Homo sapiens scaffoLd attachment factor B (SAFB), mRNA OS=Homo sapiens PE=2 SV=1;>sp|Q15424|SAFB1_HUMAN ScaffoLd attachment factor B1 OS=Homo sapiens GN=SAFB PE=1 SV=4;>tr|B7ZLP5|B7ZLP5_HUMAN SAFB pr	1.0544
NSFL1 cofactor p47	NSFL1C	>tr|J3QK90|J3QK90_HUMAN NSFL1 cofactor p47 OS=Homo sapiens GN=NSFL1C PE=4 SV=1;>tr|Q53FE8|Q53FE8_HUMAN cDNA FLJ36526 fis, cLone TRACH2003347, highLy simiLar to NSFL1 cofactor p47 (Fragment) OS=Homo sapiens PE=2 SV=1;>tr|Q53FF5|Q53FF5_HUMAN p47 protein isof	1.0552
Cytochrome b-c1 complex subunit 2, mitochondrial	UQCRC2	>sp|P22695|QCR2_HUMAN Cytochrome b-c1 compLex subunit 2, mitochondriaL OS=Homo sapiens GN=UQCRC2 PE=1 SV=3;>tr|H3BRG4|H3BRG4_HUMAN Cytochrome b-c1 compLex subunit 2, mitochondriaL OS=Homo sapiens GN=UQCRC2 PE=2 SV=1	1.0572
116 kDa U5 small nuclear ribonucleoprotein component	EFTUD2;U5-116KD;SNRP116	>tr|A8KAP3|A8KAP3_HUMAN cDNA FLJ78483, highLy simiLar to Homo sapiens eLongation factor Tu GTP binding domain containing 2 (EFTUD2), mRNA OS=Homo sapiens PE=2 SV=1;>sp|Q15029|U5S1_HUMAN 116 kDa U5 smaLL nucLear ribonucLeoprotein component OS=Homo sapiens G	1.0578
Histidine triad nucleotide-binding protein 1	HINT1;LOC346521	>sp|P49773|HINT1_HUMAN Histidine triad nucLeotide-binding protein 1 OS=Homo sapiens GN=HINT1 PE=1 SV=2;>tr|A4D2H4|A4D2H4_HUMAN SimiLar to Histidine triad nucLeotide-binding protein 1 (Adenosine 5-monophosphoramidase) (Protein kinase C inhibitor 1) (Protein	1.059
STE20/SPS1-related proline-alanine-rich protein kinase	STK39	>sp|Q9UEW8|STK39_HUMAN STE20/SPS1-reLated proLine-aLanine-rich protein kinase OS=Homo sapiens GN=STK39 PE=1 SV=3;>tr|Q6E0B2|Q6E0B2_HUMAN SmaLL intestine SPAK-Like kinase OS=Homo sapiens PE=2 SV=1	1.0608
Endoplasmin	HSP90B1;TRA1	>sp|P14625|ENPL_HUMAN EndopLasmin OS=Homo sapiens GN=HSP90B1 PE=1 SV=1;>tr|Q5CAQ5|Q5CAQ5_HUMAN Tumor rejection antigen (Gp96) 1 OS=Homo sapiens GN=TRA1 PE=2 SV=1;>tr|Q59FC6|Q59FC6_HUMAN Tumor rejection antigen (Gp96) 1 variant (Fragment) OS=Homo sapiens PE	1.0621
Malate dehydrogenase, cytoplasmic;Malate dehydrogenase	MDH1	>sp|P40925|MDHC_HUMAN MaLate dehydrogenase, cytopLasmic OS=Homo sapiens GN=MDH1 PE=1 SV=4;>tr|B9A041|B9A041_HUMAN MaLate dehydrogenase, cytopLasmic OS=Homo sapiens GN=MDH1 PE=2 SV=1;>tr|C9JF79|C9JF79_HUMAN MaLate dehydrogenase (Fragment) OS=Homo sapiens GN	1.0627
Eukaryotic translation initiation factor 2 subunit 2	EIF2S2	>tr|B5BU01|B5BU01_HUMAN Eukaryotic transLation initiation factor 2 beta OS=Homo sapiens GN=EIF2S2 PE=2 SV=1;>sp|P20042|IF2B_HUMAN Eukaryotic transLation initiation factor 2 subunit 2 OS=Homo sapiens GN=EIF2S2 PE=1 SV=2;>tr|Q6IBR8|Q6IBR8_HUMAN EIF2S2 protei	1.0643
POTE ankyrin domain family member E;POTE ankyrin domain family member I;Putative beta-actin-like protein 3;POTE ankyrin domain family member J	POTEE;POTEI;POTEKP;POTEJ	>sp|Q6S8J3|POTEE_HUMAN POTE ankyrin domain famiLy member E OS=Homo sapiens GN=POTEE PE=1 SV=3;>sp|P0CG38|POTEI_HUMAN POTE ankyrin domain famiLy member I OS=Homo sapiens GN=POTEI PE=3 SV=1;>sp|Q9BYX7|ACTBM_HUMAN Putative beta-actin-Like protein 3 OS=Homo sa	1.0663
Proteasome activator complex subunit 1	PSME1	>sp|Q06323|PSME1_HUMAN Proteasome activator compLex subunit 1 OS=Homo sapiens GN=PSME1 PE=1 SV=1;>tr|Q6FHU3|Q6FHU3_HUMAN PSME1 protein (Fragment) OS=Homo sapiens GN=PSME1 PE=2 SV=1;>tr|H0YNE3|H0YNE3_HUMAN Proteasome activator compLex subunit 1 OS=Homo sapi	1.0671
Poly [ADP-ribose] polymerase 1	PARP1	>tr|B2R5W3|B2R5W3_HUMAN cDNA, FLJ92658, highLy simiLar to Homo sapiens poLy (ADP-ribose) poLymerase famiLy, member 1 (PARP1), mRNA OS=Homo sapiens PE=2 SV=1;>sp|P09874|PARP1_HUMAN PoLy [ADP-ribose] poLymerase 1 OS=Homo sapiens GN=PARP1 PE=1 SV=4;>tr|B4E0E1	1.069
Multifunctional protein ADE2;Phosphoribosylaminoimidazole-succinocarboxamide synthase;Phosphoribosylaminoimidazole carboxylase;Phosphoribosylaminoimidazole-succinocarboxamide synthase	PAICS	>sp|P22234|PUR6_HUMAN MuLtifunctionaL protein ADE2 OS=Homo sapiens GN=PAICS PE=1 SV=3;>tr|E9PBS1|E9PBS1_HUMAN PhosphoribosyLaminoimidazoLe carboxyLase (Fragment) OS=Homo sapiens GN=PAICS PE=2 SV=1;>tr|B4DGX3|B4DGX3_HUMAN PhosphoribosyLaminoimidazoLe-succin	1.0698
Transketolase	TKT	>sp|P29401|TKT_HUMAN TransketoLase OS=Homo sapiens GN=TKT PE=1 SV=3;>tr|Q53EM5|Q53EM5_HUMAN TransketoLase variant (Fragment) OS=Homo sapiens PE=2 SV=1;>tr|B4E022|B4E022_HUMAN TransketoLase OS=Homo sapiens GN=TKT PE=2 SV=1;>tr|B3KSI4|B3KSI4_HUMAN cDNA FLJ36	1.0711
Hydroxyacyl-coenzyme A dehydrogenase, mitochondrial	HADH	>tr|B3KTT6|B3KTT6_HUMAN cDNA FLJ38699 fis, cLone KIDNE2002168, highLy simiLar to Short chain 3-hydroxyacyL-CoA dehydrogenase, mitochondriaL (EC 1.1.1.35) OS=Homo sapiens PE=2 SV=1;>tr|E9PF18|E9PF18_HUMAN HydroxyacyL-coenzyme A dehydrogenase, mitochondriaL	1.0715
BPI fold-containing family A member 2	BPIFA2	>tr|A8K739|A8K739_HUMAN cDNA FLJ77339 OS=Homo sapiens PE=2 SV=1;>sp|Q96DR5|BPIA2_HUMAN BPI foLd-containing famiLy A member 2 OS=Homo sapiens GN=BPIFA2 PE=1 SV=2	1.0736
40S ribosomal protein S2	RPS2;rps2;LOC392781	>sp|P15880|RS2_HUMAN 40S ribosomaL protein S2 OS=Homo sapiens GN=RPS2 PE=1 SV=2;>tr|Q3KQT6|Q3KQT6_HUMAN RibosomaL protein S2 OS=Homo sapiens GN=RPS2 PE=2 SV=1;>tr|Q6IPX5|Q6IPX5_HUMAN RibosomaL protein S2 OS=Homo sapiens GN=RPS2 PE=2 SV=1;>tr|Q8J014|Q8J014_	1.075
Guanine nucleotide-binding protein G(s) subunit alpha isoforms XLas;Guanine nucleotide-binding protein G(s) subunit alpha isoforms short;Guanine nucleotide-binding protein G(olf) subunit alpha;Guanine nucleotide-binding protein G(i) subunit alpha-2;Guanine nucleotide-binding protein G(t) subunit alpha-3;Guanine nucleotide-binding protein G(k) subunit alpha;Guanine nucleotide-binding protein G(o) …	GNAS;GNAL;GNAI2;GNAT3;GNAI3;GNAO1;GNAT2;GNAI1;GNAT1;WUGSC:H_LUCA16.1	>sp|Q5JWF2|GNAS1_HUMAN Guanine nucLeotide-binding protein G(s) subunit aLpha isoforms XLas OS=Homo sapiens GN=GNAS PE=1 SV=2;>sp|P63092|GNAS2_HUMAN Guanine nucLeotide-binding protein G(s) subunit aLpha isoforms short OS=Homo sapiens GN=GNAS PE=1 SV=1;>tr|A	1.078
Rab GDP dissociation inhibitor beta	GDI2	>tr|B4DLV7|B4DLV7_HUMAN cDNA FLJ60299, highLy simiLar to Rab GDP dissociation inhibitor beta OS=Homo sapiens PE=2 SV=1;>tr|E7EU23|E7EU23_HUMAN Rab GDP dissociation inhibitor beta OS=Homo sapiens GN=GDI2 PE=2 SV=1;>sp|P50395|GDIB_HUMAN Rab GDP dissociation	1.0786
Ribosome-binding protein 1	RRBP1	>tr|A7BI36|A7BI36_HUMAN p180/ribosome receptor OS=Homo sapiens GN=RRBP1 PE=2 SV=2;>sp|Q9P2E9|RRBP1_HUMAN Ribosome-binding protein 1 OS=Homo sapiens GN=RRBP1 PE=1 SV=4;>tr|A1A5C4|A1A5C4_HUMAN RRBP1 protein OS=Homo sapiens GN=RRBP1 PE=2 SV=1;>tr|A1A5C5|A1A5C	1.0803
Transitional endoplasmic reticulum ATPase	VCP;DKFZp434K0126	>sp|P55072|TERA_HUMAN TransitionaL endopLasmic reticuLum ATPase OS=Homo sapiens GN=VCP PE=1 SV=4;>tr|Q96IF9|Q96IF9_HUMAN VCP protein (Fragment) OS=Homo sapiens GN=VCP PE=2 SV=2;>tr|Q0IIN5|Q0IIN5_HUMAN VCP protein OS=Homo sapiens GN=VCP PE=2 SV=1;>tr|Q9NTC4	1.0836
Activated RNA polymerase II transcriptional coactivator p15	SUB1;PC4	>tr|Q59G24|Q59G24_HUMAN Activated RNA poLymerase II transcription cofactor 4 variant (Fragment) OS=Homo sapiens PE=2 SV=1;>sp|P53999|TCP4_HUMAN Activated RNA poLymerase II transcriptionaL coactivator p15 OS=Homo sapiens GN=SUB1 PE=1 SV=3;>tr|Q6IBA2|Q6IBA2_	1.0837
LIM and SH3 domain protein 1	LASP1	>sp|Q14847|LASP1_HUMAN LIM and SH3 domain protein 1 OS=Homo sapiens GN=LASP1 PE=1 SV=2;>tr|B4DJI4|B4DJI4_HUMAN cDNA FLJ58065, highLy simiLar to LIM and SH3 domain protein 1 OS=Homo sapiens PE=2 SV=1;>tr|C9J9W2|C9J9W2_HUMAN LIM and SH3 domain protein 1 (Fra	1.0862
Lamina-associated polypeptide 2, isoform alpha;Thymopoietin;Thymopentin;Lamina-associated polypeptide 2, isoforms beta/gamma;Thymopoietin;Thymopentin	TMPO	>sp|P42166|LAP2A_HUMAN Lamina-associated poLypeptide 2, isoform aLpha OS=Homo sapiens GN=TMPO PE=1 SV=2;>sp|P42167|LAP2B_HUMAN Lamina-associated poLypeptide 2, isoforms beta/gamma OS=Homo sapiens GN=TMPO PE=1 SV=2;>tr|G5E972|G5E972_HUMAN Thymopentin OS=Hom	1.0894
Ras GTPase-activating-like protein IQGAP1	IQGAP1	>tr|A4QPB0|A4QPB0_HUMAN IQ motif containing GTPase activating protein 1 OS=Homo sapiens GN=IQGAP1 PE=2 SV=1;>sp|P46940|IQGA1_HUMAN Ras GTPase-activating-Like protein IQGAP1 OS=Homo sapiens GN=IQGAP1 PE=1 SV=1;>tr|Q6P1N4|Q6P1N4_HUMAN IQGAP1 protein (Fragmen	1.09
Leucine-rich repeat flightless-interacting protein 1	LRRFIP1	>sp|Q32MZ4|LRRF1_HUMAN Leucine-rich repeat fLightLess-interacting protein 1 OS=Homo sapiens GN=LRRFIP1 PE=1 SV=2	1.0926
Phosphoserine aminotransferase	PSAT1	>tr|B4DHQ3|B4DHQ3_HUMAN cDNA FLJ56437, highLy simiLar to Phosphoserine aminotransferase (EC 2.6.1.52) OS=Homo sapiens PE=2 SV=1;>sp|Q9Y617|SERC_HUMAN Phosphoserine aminotransferase OS=Homo sapiens GN=PSAT1 PE=1 SV=2	1.0931
Heterogeneous nuclear ribonucleoprotein R	HNRNPR;DKFZp686A13234;HNRPR	>tr|B2R7W4|B2R7W4_HUMAN cDNA, FLJ93632, highLy simiLar to Homo sapiens heterogeneous nucLear ribonucLeoprotein R (HNRPR), mRNA OS=Homo sapiens PE=2 SV=1;>sp|O43390|HNRPR_HUMAN Heterogeneous nucLear ribonucLeoprotein R OS=Homo sapiens GN=HNRNPR PE=1 SV=1;>t	1.0956
Splicing factor 3B subunit 2	SF3B2;DKFZp781L0540	>sp|Q13435|SF3B2_HUMAN SpLicing factor 3B subunit 2 OS=Homo sapiens GN=SF3B2 PE=1 SV=2;>tr|E9PPJ0|E9PPJ0_HUMAN SpLicing factor 3B subunit 2 OS=Homo sapiens GN=SF3B2 PE=2 SV=1;>tr|H0YCG1|H0YCG1_HUMAN SpLicing factor 3B subunit 2 (Fragment) OS=Homo sapiens G	1.0979
Staphylococcal nuclease domain-containing protein 1	SND1	>tr|Q59FF0|Q59FF0_HUMAN EBNA-2 co-activator variant (Fragment) OS=Homo sapiens PE=2 SV=1;>sp|Q7KZF4|SND1_HUMAN StaphyLococcaL nucLease domain-containing protein 1 OS=Homo sapiens GN=SND1 PE=1 SV=1;>tr|B3KU67|B3KU67_HUMAN cDNA FLJ39264 fis, cLone OCBBF20096	1.102
Septin-9	2020-09-09	>sp|Q9UHD8|SEPT9_HUMAN Septin-9 OS=Homo sapiens GN=SEPT9 PE=1 SV=2;>tr|K7EL40|K7EL40_HUMAN Septin-9 (Fragment) OS=Homo sapiens GN=SEPT9 PE=4 SV=1;>tr|K7EK18|K7EK18_HUMAN Septin-9 (Fragment) OS=Homo sapiens GN=SEPT9 PE=4 SV=1;>tr|K7EQD7|K7EQD7_HUMAN Septin-	1.1044
Ubiquitin-conjugating enzyme E2 variant 1;Ubiquitin-conjugating enzyme E2 variant 2	TMEM189;UBE2V2;UBE2V1	>tr|G3V2F7|G3V2F7_HUMAN HCG2044781 OS=Homo sapiens GN=TMEM189 PE=4 SV=1;>tr|H0YBX6|H0YBX6_HUMAN Ubiquitin-conjugating enzyme E2 variant 2 (Fragment) OS=Homo sapiens GN=UBE2V2 PE=4 SV=1;>sp|Q13404|UB2V1_HUMAN Ubiquitin-conjugating enzyme E2 variant 1 OS=Hom	1.1099
Fatty acid-binding protein, epidermal	FABP5	>tr|E7DVW5|E7DVW5_HUMAN Fatty acid binding protein 5 (Psoriasis-associated) OS=Homo sapiens GN=FABP5 PE=2 SV=1;>sp|Q01469|FABP5_HUMAN Fatty acid-binding protein, epidermaL OS=Homo sapiens GN=FABP5 PE=1 SV=3;>tr|I6L8B7|I6L8B7_HUMAN Fatty acid-binding protei	1.1215
Na(+)/H(+) exchange regulatory cofactor NHE-RF1	SLC9A3R1	>tr|B2R6A3|B2R6A3_HUMAN cDNA, FLJ92860, highLy simiLar to Homo sapiens soLute carrier famiLy 9 (sodium/hydrogen exchanger), member 3 reguLator 1 (SLC9A3R1), mRNA OS=Homo sapiens PE=2 SV=1;>sp|O14745|NHRF1_HUMAN Na(+)/H(+) exchange reguLatory cofactor NHE-R	1.1238
SAP domain-containing ribonucleoprotein	SARNP;LOC402290;CIP29	>tr|H0YHG0|H0YHG0_HUMAN Uncharacterized protein (Fragment) OS=Homo sapiens PE=4 SV=1;>sp|P82979|SARNP_HUMAN SAP domain-containing ribonucLeoprotein OS=Homo sapiens GN=SARNP PE=1 SV=3;>tr|A4D286|A4D286_HUMAN SimiLar to NucLear protein Hcc-1 (HSPC316) (ProLi	1.1264
NudC domain-containing protein 2	NUDCD2	>sp|Q8WVJ2|NUDC2_HUMAN NudC domain-containing protein 2 OS=Homo sapiens GN=NUDCD2 PE=1 SV=1;>tr|E5RFP0|E5RFP0_HUMAN NudC domain-containing protein 2 OS=Homo sapiens GN=NUDCD2 PE=2 SV=1	1.1268
T-complex protein 1 subunit gamma	CCT3	>tr|Q59H77|Q59H77_HUMAN Chaperonin containing TCP1, subunit 3 (Gamma) variant (Fragment) OS=Homo sapiens PE=2 SV=1;>sp|P49368|TCPG_HUMAN T-compLex protein 1 subunit gamma OS=Homo sapiens GN=CCT3 PE=1 SV=4;>tr|Q2TU64|Q2TU64_HUMAN PIG48 OS=Homo sapiens PE=2	1.1272
F-actin-capping protein subunit alpha-1	CAPZA1	>tr|A8K0T9|A8K0T9_HUMAN cDNA FLJ75422, highLy simiLar to Homo sapiens capping protein (actin fiLament) muscLe Z-Line, aLpha 1, mRNA OS=Homo sapiens PE=2 SV=1;>sp|P52907|CAZA1_HUMAN F-actin-capping protein subunit aLpha-1 OS=Homo sapiens GN=CAPZA1 PE=1 SV=3	1.1274
Trifunctional enzyme subunit alpha, mitochondrial;Long-chain enoyl-CoA hydratase;Long chain 3-hydroxyacyl-CoA dehydrogenase	HADHA	>tr|E9KL44|E9KL44_HUMAN Epididymis tissue sperm binding protein Li 14m OS=Homo sapiens PE=2 SV=1;>sp|P40939|ECHA_HUMAN TrifunctionaL enzyme subunit aLpha, mitochondriaL OS=Homo sapiens GN=HADHA PE=1 SV=2;>tr|B4DRH6|B4DRH6_HUMAN cDNA FLJ54509, highLy simiLa	1.1284
Coronin-1A	CORO1A	>tr|Q59G88|Q59G88_HUMAN Coronin (Fragment) OS=Homo sapiens PE=3 SV=1;>sp|P31146|COR1A_HUMAN Coronin-1A OS=Homo sapiens GN=CORO1A PE=1 SV=4;>tr|H3BRY3|H3BRY3_HUMAN Coronin OS=Homo sapiens GN=CORO1A PE=2 SV=1;>tr|H3BRJ0|H3BRJ0_HUMAN Coronin (Fragment) OS=Hom	1.1296
Keratin, type I cytoskeletal 10	KRT10	>P13645 SWISS-PROT:P13645 Tax_Id=9606 Gene_Symbol=KRT10 Keratin, type I cytoskeletal 10;>gi|CON_IPI00009865.2|SWISS-PROT:P13645 Tax_Id=9606 Gene_SymboL=KRT10 Keratin, type I cytoskeLetaL 10;>sp|P13645|K1C10_HUMAN Keratin, type I cytoskeLetaL 10 OS=Homo sap	1.133
Tumor protein D54	TPD52L2;DKFZp686A1765	>tr|Q5JWU6|Q5JWU6_HUMAN Tumor protein D52-Like 2, isoform CRA_e OS=Homo sapiens GN=TPD52L2 PE=4 SV=1;>sp|O43399|TPD54_HUMAN Tumor protein D54 OS=Homo sapiens GN=TPD52L2 PE=1 SV=2;>tr|Q6FGS1|Q6FGS1_HUMAN TPD52L2 protein OS=Homo sapiens GN=TPD52L2 PE=2 SV=1;	1.1385
Cofilin-1	CFL1	>tr|E9PK25|E9PK25_HUMAN CofiLin-1 OS=Homo sapiens GN=CFL1 PE=2 SV=1;>sp|P23528|COF1_HUMAN CofiLin-1 OS=Homo sapiens GN=CFL1 PE=1 SV=3;>tr|G3V1A4|G3V1A4_HUMAN CofiLin 1 (Non-muscLe), isoform CRA_a OS=Homo sapiens GN=CFL1 PE=4 SV=1;>tr|E9PP50|E9PP50_HUMAN Co	1.1395
Leucine-rich repeat-containing protein 59	LRRC59	>sp|Q96AG4|LRC59_HUMAN Leucine-rich repeat-containing protein 59 OS=Homo sapiens GN=LRRC59 PE=1 SV=1	1.1407
F-actin-capping protein subunit beta	CAPZB	>tr|B1AK88|B1AK88_HUMAN Capping protein (Actin fiLament) muscLe Z-Line, beta, isoform CRA_d OS=Homo sapiens GN=CAPZB PE=4 SV=1;>tr|B2R7T8|B2R7T8_HUMAN cDNA, FLJ93598, highLy simiLar to Homo sapiens capping protein (actin fiLament) muscLe Z-Line, beta (CAPZ	1.141
Adenylyl cyclase-associated protein;Adenylyl cyclase-associated protein 1	CAP1	>tr|B2RDY9|B2RDY9_HUMAN AdenyLyL cycLase-associated protein OS=Homo sapiens PE=2 SV=1;>tr|D3DPU2|D3DPU2_HUMAN AdenyLyL cycLase-associated protein OS=Homo sapiens GN=CAP1 PE=3 SV=1;>tr|B4DI38|B4DI38_HUMAN AdenyLyL cycLase-associated protein OS=Homo sapiens	1.1451
		>tr|B4DYN9|B4DYN9_HUMAN cDNA FLJ58437, moderateLy simiLar to CaLmoduLin-binding transcription activator 2 OS=Homo sapiens PE=2 SV=1;>tr|I3L3V0|I3L3V0_HUMAN CaLmoduLin-binding transcription activator 2 OS=Homo sapiens GN=CAMTA2 PE=2 SV=1;>tr|I3L146|I3L146_H	1.146
Superoxide dismutase [Cu-Zn]	SOD1	>sp|P00441|SODC_HUMAN Superoxide dismutase [Cu-Zn] OS=Homo sapiens GN=SOD1 PE=1 SV=2;>tr|H7BYH4|H7BYH4_HUMAN Superoxide dismutase [Cu-Zn] OS=Homo sapiens GN=SOD1 PE=2 SV=1	1.1462
Actin, alpha cardiac muscle 1;Actin, alpha skeletal muscle;Actin, aortic smooth muscle;Actin, gamma-enteric smooth muscle	ACTC1;ACTA1;ACTA2;ACTG2;ACTB	>tr|A8K3K1|A8K3K1_HUMAN cDNA FLJ78096, highLy simiLar to Homo sapiens actin, aLpha, cardiac muscLe (ACTC), mRNA OS=Homo sapiens PE=2 SV=1;>sp|P68032|ACTC_HUMAN Actin, aLpha cardiac muscLe 1 OS=Homo sapiens GN=ACTC1 PE=1 SV=1;>sp|P68133|ACTS_HUMAN Actin, aL	1.1469
Peptidyl-prolyl cis-trans isomerase;Peptidyl-prolyl cis-trans isomerase A	PPIA	>tr|A8K486|A8K486_HUMAN PeptidyL-proLyL cis-trans isomerase OS=Homo sapiens PE=2 SV=1;>sp|P62937|PPIA_HUMAN PeptidyL-proLyL cis-trans isomerase A OS=Homo sapiens GN=PPIA PE=1 SV=2;>tr|B2RE56|B2RE56_HUMAN PeptidyL-proLyL cis-trans isomerase OS=Homo sapiens	1.1475
Serine/threonine-protein kinase OSR1	OXSR1	>sp|O95747|OXSR1_HUMAN Serine/threonine-protein kinase OSR1 OS=Homo sapiens GN=OXSR1 PE=1 SV=1;>tr|C9JIG9|C9JIG9_HUMAN Serine/threonine-protein kinase OSR1 OS=Homo sapiens GN=OXSR1 PE=2 SV=1	1.1481
Signal recognition particle 14 kDa protein	SRP14	>sp|P37108|SRP14_HUMAN SignaL recognition particLe 14 kDa protein OS=Homo sapiens GN=SRP14 PE=1 SV=2;>tr|H0YLA2|H0YLA2_HUMAN SignaL recognition particLe 14 kDa protein OS=Homo sapiens GN=SRP14 PE=2 SV=1	1.1509
Actin, cytoplasmic 1;Actin, cytoplasmic 1, N-terminally processed;Actin, cytoplasmic 2;Actin, cytoplasmic 2, N-terminally processed	ACTB;ACTG1;PS1TP5BP1	>P60712 SWISS-PROT:P60712 (Bos taurus) Actin, cytoplasmic 1;>gi|CON_IPI00698900.1|SWISS-PROT:P60712 (Bos taurus) Actin, cytopLasmic 1;>sp|P60709|ACTB_HUMAN Actin, cytopLasmic 1 OS=Homo sapiens GN=ACTB PE=1 SV=1;>sp|P63261|ACTG_HUMAN Actin, cytopLasmic 2 OS	1.1585
40S ribosomal protein S3a	RPS3A	>tr|A8K4W0|A8K4W0_HUMAN 40S ribosomaL protein S3a OS=Homo sapiens GN=RPS3A PE=2 SV=1;>sp|P61247|RS3A_HUMAN 40S ribosomaL protein S3a OS=Homo sapiens GN=RPS3A PE=1 SV=2;>tr|Q6NXR8|Q6NXR8_HUMAN 40S ribosomaL protein S3a OS=Homo sapiens GN=RPS3A PE=2 SV=1;>tr	1.159
Cullin-associated NEDD8-dissociated protein 1	CAND1	>tr|A8K8U1|A8K8U1_HUMAN cDNA FLJ77762, highLy simiLar to Homo sapiens cuLLin-associated and neddyLation-dissociated 1 (CAND1), mRNA OS=Homo sapiens PE=2 SV=1;>sp|Q86VP6|CAND1_HUMAN CuLLin-associated NEDD8-dissociated protein 1 OS=Homo sapiens GN=CAND1 PE=1	1.1596
Annexin;Annexin A6	ANXA6	>tr|A8K3Q7|A8K3Q7_HUMAN Annexin OS=Homo sapiens PE=2 SV=1;>sp|P08133|ANXA6_HUMAN Annexin A6 OS=Homo sapiens GN=ANXA6 PE=1 SV=3;>tr|A6NN80|A6NN80_HUMAN Annexin OS=Homo sapiens GN=ANXA6 PE=3 SV=3;>tr|E5RK69|E5RK69_HUMAN Annexin OS=Homo sapiens GN=ANXA6 PE=2	1.1599
Protein disulfide-isomerase A6	PDIA6	>tr|B3KY95|B3KY95_HUMAN cDNA FLJ16143 fis, cLone BRAMY2038516, highLy simiLar to Protein disuLfide-isomerase A6 (EC 5.3.4.1) OS=Homo sapiens PE=2 SV=1;>tr|B5MCQ5|B5MCQ5_HUMAN Protein disuLfide-isomerase A6 OS=Homo sapiens GN=PDIA6 PE=2 SV=1;>tr|B7Z4M8|B7Z4	1.1657
Protein S100-A11	S100A11	>sp|P31949|S10AB_HUMAN Protein S100-A11 OS=Homo sapiens GN=S100A11 PE=1 SV=2;>tr|B2R5H0|B2R5H0_HUMAN cDNA, FLJ92471, highLy simiLar to Homo sapiens S100 caLcium binding protein A11 (caLgizzarin) (S100A11), mRNA OS=Homo sapiens PE=4 SV=1	1.1691
Platelet-activating factor acetylhydrolase IB subunit gamma	PAFAH1B3	>sp|Q15102|PA1B3_HUMAN PLateLet-activating factor acetyLhydroLase IB subunit gamma OS=Homo sapiens GN=PAFAH1B3 PE=1 SV=1;>tr|M0R389|M0R389_HUMAN PLateLet-activating factor acetyLhydroLase IB subunit gamma (Fragment) OS=Homo sapiens GN=PAFAH1B3 PE=4 SV=1	1.1754
Dihydrolipoyllysine-residue acetyltransferase component of pyruvate dehydrogenase complex, mitochondrial	DLAT	>sp|P10515|ODP2_HUMAN DihydroLipoyLLysine-residue acetyLtransferase component of pyruvate dehydrogenase compLex, mitochondriaL OS=Homo sapiens GN=DLAT PE=1 SV=3;>tr|Q86YI5|Q86YI5_HUMAN DihydroLipoamide S-acetyLtransferase OS=Homo sapiens GN=DLAT PE=2 SV=1;	1.177
Protein DJ-1	PARK7	>sp|Q99497|PARK7_HUMAN Protein DJ-1 OS=Homo sapiens GN=PARK7 PE=1 SV=2;>tr|K7ELW0|K7ELW0_HUMAN Protein DJ-1 OS=Homo sapiens GN=PARK7 PE=4 SV=1;>tr|K7EN27|K7EN27_HUMAN Protein DJ-1 (Fragment) OS=Homo sapiens GN=PARK7 PE=4 SV=1	1.1785
Thioredoxin	PDIA3	>tr|H7BZJ3|H7BZJ3_HUMAN Thioredoxin (Fragment) OS=Homo sapiens GN=PDIA3 PE=2 SV=1	1.1843
Profilin-1	PFN1	>sp|P07737|PROF1_HUMAN ProfiLin-1 OS=Homo sapiens GN=PFN1 PE=1 SV=2;>tr|K7EJ44|K7EJ44_HUMAN ProfiLin 1, isoform CRA_b OS=Homo sapiens GN=PFN1 PE=4 SV=1	1.185
NADH dehydrogenase [ubiquinone] 1 beta subcomplex subunit 10	NDUFB10	>tr|A8K761|A8K761_HUMAN NADH dehydrogenase (Ubiquinone) 1 beta subcompLex, 10, 22kDa, isoform CRA_b OS=Homo sapiens GN=NDUFB10 PE=2 SV=1;>sp|O96000|NDUBA_HUMAN NADH dehydrogenase [ubiquinone] 1 beta subcompLex subunit 10 OS=Homo sapiens GN=NDUFB10 PE=1 SV=	1.1864
Copine-1	CPNE1	>tr|B0QZ18|B0QZ18_HUMAN Copine-1 OS=Homo sapiens GN=CPNE1 PE=4 SV=1;>sp|Q99829|CPNE1_HUMAN Copine-1 OS=Homo sapiens GN=CPNE1 PE=1 SV=1;>tr|F2Z2V0|F2Z2V0_HUMAN Copine-1 (Fragment) OS=Homo sapiens GN=CPNE1 PE=2 SV=1;>tr|Q59EI4|Q59EI4_HUMAN Copine I variant (	1.187
Histone H2B;Histone H2B type 1-K;Histone H2B type 1-J;Histone H2B type 1-O;Histone H2B type 1-B;Histone H2B type F-S;Histone H2B type 1-D;Histone H2B type 1-C/E/F/G/I;Histone H2B type 2-E;Histone H2B type 2-F;Histone H2B type 1-H;Histone H2B type 1-N;Histone H2B type 1-M;Histone H2B type 1-L;Histone H2B type 1-A;Histone H2B type 3-B	HIST2H2BF;HIST1H2BF;HIST1H2BK;HIST1H2BJ;HIST1H2BO;HIST1H2BB;H2BFS;HIST1H2BD;HIST1H2BC;HIST2H2BE;HIST1H2BH;HIST1H2BN;HIST1H2BM;HIST1H2BL;HIST1H2BA;HIST3H2BB	>tr|B4DR52|B4DR52_HUMAN Histone H2B OS=Homo sapiens GN=HIST2H2BF PE=2 SV=1;>tr|I6L9F7|I6L9F7_HUMAN Histone H2B (Fragment) OS=Homo sapiens GN=HIST1H2BM PE=2 SV=1;>tr|A8K9J7|A8K9J7_HUMAN Histone H2B OS=Homo sapiens PE=2 SV=1;>tr|B2R4S9|B2R4S9_HUMAN Histone H	1.1893
Glutamate dehydrogenase 1, mitochondrial;Glutamate dehydrogenase 2, mitochondrial;Glutamate dehydrogenase	GLUD1;GLUD2	>gi|CON_DHE3_BOVIN|SWISS-PROT:P00366 Bovine gLutamate dehydrogenase 1, mitochondriaL precursor (E.C. 1.4.1.3);>tr|E9KL48|E9KL48_HUMAN Epididymis tissue sperm binding protein Li 18mP OS=Homo sapiens GN=GLUD1 PE=2 SV=1;>sp|P00367|DHE3_HUMAN GLutamate dehydro	1.1926
Malate dehydrogenase, mitochondrial;Malate dehydrogenase	MDH2	>sp|P40926|MDHM_HUMAN MaLate dehydrogenase, mitochondriaL OS=Homo sapiens GN=MDH2 PE=1 SV=3;>tr|Q6FHZ0|Q6FHZ0_HUMAN MaLate dehydrogenase OS=Homo sapiens GN=MDH2 PE=2 SV=1;>tr|Q75MT9|Q75MT9_HUMAN MaLate dehydrogenase (Fragment) OS=Homo sapiens GN=MDH2 PE=2	1.1929
Talin-1	TLN1	>sp|Q9Y490|TLN1_HUMAN TaLin-1 OS=Homo sapiens GN=TLN1 PE=1 SV=3;>tr|Q5TCU6|Q5TCU6_HUMAN TaLin-1 OS=Homo sapiens GN=TLN1 PE=2 SV=1	1.1937
Heat shock 70 kDa protein 1A/1B	HSPA1A	>tr|Q59EJ3|Q59EJ3_HUMAN Heat shock 70kDa protein 1A variant (Fragment) OS=Homo sapiens PE=2 SV=1;>tr|A8K5I0|A8K5I0_HUMAN Heat shock 70kDa protein 1A OS=Homo sapiens GN=HSPA1B PE=2 SV=1;>sp|P08107|HSP71_HUMAN Heat shock 70 kDa protein 1A/1B OS=Homo sapiens	1.1952
Peroxiredoxin-1	PRDX1	>sp|Q06830|PRDX1_HUMAN Peroxiredoxin-1 OS=Homo sapiens GN=PRDX1 PE=1 SV=1;>tr|B2R4P2|B2R4P2_HUMAN cDNA, FLJ92164, highLy simiLar to Homo sapiens peroxiredoxin 1 (PRDX1), mRNA OS=Homo sapiens PE=2 SV=1	1.1975
Copine-3;Copine-7;Copine-5;Copine-8;Copine-6;Copine-4;Copine-9;Copine-2	CPNE3;CPNE7;CPNE6;CPNE5;CPNE8;CPNE4;CPNE9;CPNE2	>sp|O75131|CPNE3_HUMAN Copine-3 OS=Homo sapiens GN=CPNE3 PE=1 SV=1;>sp|Q9UBL6|CPNE7_HUMAN Copine-7 OS=Homo sapiens GN=CPNE7 PE=2 SV=1;>tr|B7Z1M3|B7Z1M3_HUMAN cDNA FLJ55997, highLy simiLar to Copine-6 OS=Homo sapiens PE=2 SV=1;>tr|F5GXN1|F5GXN1_HUMAN Copine	1.2097
Hepatoma-derived growth factor	HDGF	>tr|B7Z525|B7Z525_HUMAN cDNA FLJ55039, moderateLy simiLar to Hepatoma-derived growth factor OS=Homo sapiens PE=2 SV=1;>tr|B2RDE8|B2RDE8_HUMAN cDNA, FLJ96580, highLy simiLar to Homo sapiens hepatoma-derived growth factor (high-mobiLity group protein 1-Like)	1.2098
Glutathione reductase, mitochondrial	GSR	>sp|P00390|GSHR_HUMAN GLutathione reductase, mitochondriaL OS=Homo sapiens GN=GSR PE=1 SV=2;>tr|H0YBD4|H0YBD4_HUMAN GLutathione reductase, mitochondriaL (Fragment) OS=Homo sapiens GN=GSR PE=4 SV=1;>tr|H0YC68|H0YC68_HUMAN GLutathione reductase, mitochondria	1.2162
ATP synthase subunit g, mitochondrial	ATP5L	>sp|O75964|ATP5L_HUMAN ATP synthase subunit g, mitochondriaL OS=Homo sapiens GN=ATP5L PE=1 SV=3;>tr|E9PN17|E9PN17_HUMAN ATP synthase subunit g, mitochondriaL OS=Homo sapiens GN=ATP5L PE=2 SV=1	1.2171
Thioredoxin	TXN	>tr|H9ZYJ2|H9ZYJ2_HUMAN Thioredoxin OS=Homo sapiens GN=TXN PE=2 SV=1;>sp|P10599|THIO_HUMAN Thioredoxin OS=Homo sapiens GN=TXN PE=1 SV=3	1.2174
Protein disulfide-isomerase A3	PDIA3	>sp|P30101|PDIA3_HUMAN Protein disuLfide-isomerase A3 OS=Homo sapiens GN=PDIA3 PE=1 SV=4;>tr|B3KQT2|B3KQT2_HUMAN cDNA PSEC0148 fis, cLone PLACE1007202, highLy simiLar to Protein disuLfide-isomerase A3 (EC 5.3.4.1) OS=Homo sapiens PE=2 SV=1;>tr|G5EA52|G5EA5	1.2271
Heterogeneous nuclear ribonucleoprotein H3	HNRNPH3	>sp|P31942|HNRH3_HUMAN Heterogeneous nucLear ribonucLeoprotein H3 OS=Homo sapiens GN=HNRNPH3 PE=1 SV=2;>tr|Q53F48|Q53F48_HUMAN Heterogeneous nucLear ribonucLeoprotein H3 isoform a variant (Fragment) OS=Homo sapiens PE=2 SV=1;>tr|B4DHY1|B4DHY1_HUMAN Heterog	1.2362
Costars family protein ABRACL	ABRACL	>sp|Q9P1F3|ABRAL_HUMAN Costars famiLy protein ABRACL OS=Homo sapiens GN=ABRACL PE=1 SV=1	1.2377
Glyceraldehyde-3-phosphate dehydrogenase	GAPDH	>sp|P04406|G3P_HUMAN GLyceraLdehyde-3-phosphate dehydrogenase OS=Homo sapiens GN=GAPDH PE=1 SV=3;>tr|Q2TSD0|Q2TSD0_HUMAN GLyceraLdehyde-3-phosphate dehydrogenase OS=Homo sapiens PE=2 SV=1;>tr|E7EUT5|E7EUT5_HUMAN GLyceraLdehyde-3-phosphate dehydrogenase OS=	1.2392
Eukaryotic translation initiation factor 2 subunit 3;Putative eukaryotic translation initiation factor 2 subunit 3-like protein	EIF2S3;EIF2S3L	>tr|A8K2Y2|A8K2Y2_HUMAN cDNA FLJ78120, highLy simiLar to Homo sapiens eukaryotic transLation initiation factor 2, subunit 3 gamma, 52kDa (EIF2S3), mRNA OS=Homo sapiens PE=2 SV=1;>tr|B2R5N2|B2R5N2_HUMAN cDNA, FLJ92541, highLy simiLar to Homo sapiens eukaryo	1.2398
Adipocyte plasma membrane-associated protein	APMAP;C20orf3	>sp|Q9HDC9|APMAP_HUMAN Adipocyte pLasma membrane-associated protein OS=Homo sapiens GN=APMAP PE=1 SV=2;>tr|H0Y512|H0Y512_HUMAN Adipocyte pLasma membrane-associated protein (Fragment) OS=Homo sapiens GN=APMAP PE=4 SV=1	1.2414
E3 SUMO-protein ligase RanBP2;Putative peptidyl-prolyl cis-trans isomerase	RANBP2	>sp|P49792|RBP2_HUMAN E3 SUMO-protein Ligase RanBP2 OS=Homo sapiens GN=RANBP2 PE=1 SV=2	1.2451
Phosphoglucomutase-1	PGM1	>tr|B7Z6C2|B7Z6C2_HUMAN cDNA FLJ50663, highLy simiLar to PhosphogLucomutase-1 (EC 5.4.2.2) OS=Homo sapiens PE=2 SV=1;>sp|P36871|PGM1_HUMAN PhosphogLucomutase-1 OS=Homo sapiens GN=PGM1 PE=1 SV=3;>tr|B4DFP1|B4DFP1_HUMAN cDNA FLJ51818, highLy simiLar to Phosp	1.2496
Protein disulfide-isomerase A4	PDIA4	>sp|P13667|PDIA4_HUMAN Protein disuLfide-isomerase A4 OS=Homo sapiens GN=PDIA4 PE=1 SV=2	1.2528
Glia maturation factor gamma;Glia maturation factor beta	GMFG;GMFB	>sp|O60234|GMFG_HUMAN GLia maturation factor gamma OS=Homo sapiens GN=GMFG PE=1 SV=1;>tr|Q6IB37|Q6IB37_HUMAN GMFG protein OS=Homo sapiens GN=GMFG PE=2 SV=1;>tr|Q8TDZ6|Q8TDZ6_HUMAN GLia maturation factor gamma OS=Homo sapiens PE=4 SV=1;>tr|M0R0C1|M0R0C1_HUM	1.2641
78 kDa glucose-regulated protein	HSPA5	>sp|P11021|GRP78_HUMAN 78 kDa gLucose-reguLated protein OS=Homo sapiens GN=HSPA5 PE=1 SV=2;>tr|B4DEF7|B4DEF7_HUMAN cDNA FLJ60062, highLy simiLar to 78 kDa gLucose-reguLated protein OS=Homo sapiens PE=2 SV=1	1.2654
Serrate RNA effector molecule homolog	SRRT	>sp|Q9BXP5|SRRT_HUMAN Serrate RNA effector moLecuLe homoLog OS=Homo sapiens GN=SRRT PE=1 SV=1;>tr|H7C3A1|H7C3A1_HUMAN Serrate RNA effector moLecuLe homoLog (Fragment) OS=Homo sapiens GN=SRRT PE=2 SV=1;>tr|Q7Z4Y3|Q7Z4Y3_HUMAN Arsenite-resistance protein ARS	1.267
Nucleolar protein 58	NOP58	>sp|Q9Y2X3|NOP58_HUMAN NucLeoLar protein 58 OS=Homo sapiens GN=NOP58 PE=1 SV=1;>tr|B3KN82|B3KN82_HUMAN cDNA FLJ13913 fis, cLone Y79AA1000231, highLy simiLar to NucLeoLar protein NOP5 OS=Homo sapiens PE=2 SV=1	1.2699
Histone H2A;Histone H2A type 1-B/E;Histone H2A type 1;Histone H2A type 1-D;Histone H2A type 2-A;Histone H2A type 3;Histone H2A type 1-C;Histone H2A type 2-C;Histone H2A.J;Histone H2A type 1-H;Histone H2A type 1-J	HIST1H2AK;HIST1H2AB;HIST1H2AG;HIST1H2AD;HIST2H2AA3;HIST3H2A;HIST1H2AC;HIST2H2AC;H2AFJ;HIST1H2AH;HIST1H2AJ	>tr|A4FTV9|A4FTV9_HUMAN Histone H2A OS=Homo sapiens GN=HIST1H2AK PE=2 SV=1;>tr|B2R5B3|B2R5B3_HUMAN Histone H2A OS=Homo sapiens PE=2 SV=1;>sp|P04908|H2A1B_HUMAN Histone H2A type 1-B/E OS=Homo sapiens GN=HIST1H2AB PE=1 SV=2;>sp|P0C0S8|H2A1_HUMAN Histone H2A	1.2705
ATP synthase subunit b, mitochondrial	ATP5F1;hCG_39985	>tr|A8K4W2|A8K4W2_HUMAN cDNA FLJ78635, highLy simiLar to Homo sapiens ATP synthase, H+ transporting, mitochondriaL F0 compLex, subunit b, isoform 1 (ATP5F1), transcript variant 1, mRNA OS=Homo sapiens PE=2 SV=1;>sp|P24539|AT5F1_HUMAN ATP synthase subunit b	1.271
Lactoylglutathione lyase	GLO1	>sp|Q04760|LGUL_HUMAN LactoyLgLutathione Lyase OS=Homo sapiens GN=GLO1 PE=1 SV=4	1.2719
	TUBB4Q	>tr|I0CMK4|I0CMK4_HUMAN Beta-tubuLin 4Q isoform 1 (Fragment) OS=Homo sapiens GN=TUBB4Q PE=3 SV=1	1.2725
Alanine--tRNA ligase, cytoplasmic	AARS	>tr|B4DR45|B4DR45_HUMAN cDNA FLJ61339, highLy simiLar to ALanyL-tRNA synthetase (EC 6.1.1.7) OS=Homo sapiens PE=2 SV=1;>sp|P49588|SYAC_HUMAN ALanine--tRNA Ligase, cytopLasmic OS=Homo sapiens GN=AARS PE=1 SV=2;>tr|H3BPK7|H3BPK7_HUMAN ALanine--tRNA Ligase, c	1.2732
Histone H2A.x;Histone H2A type 1-A;Histone H2A type 2-B	H2AFX;HIST1H2AA;HIST2H2AB	>sp|P16104|H2AX_HUMAN Histone H2A.x OS=Homo sapiens GN=H2AFX PE=1 SV=2;>sp|Q96QV6|H2A1A_HUMAN Histone H2A type 1-A OS=Homo sapiens GN=HIST1H2AA PE=1 SV=3;>sp|Q8IUE6|H2A2B_HUMAN Histone H2A type 2-B OS=Homo sapiens GN=HIST2H2AB PE=1 SV=3	1.2736
WD repeat-containing protein 11	WDR11	>tr|B2RCJ6|B2RCJ6_HUMAN cDNA, FLJ96114, highLy simiLar to Homo sapiens bromodomain and WD repeat domain containing 2 (BRWD2), mRNA OS=Homo sapiens PE=2 SV=1;>sp|Q9BZH6|WDR11_HUMAN WD repeat-containing protein 11 OS=Homo sapiens GN=WDR11 PE=1 SV=1	1.276
SH3 domain-binding glutamic acid-rich-like protein	SH3BGRL	>sp|O75368|SH3L1_HUMAN SH3 domain-binding gLutamic acid-rich-Like protein OS=Homo sapiens GN=SH3BGRL PE=1 SV=1	1.2768
Perilipin-3	PLIN3	>sp|O60664|PLIN3_HUMAN PeriLipin-3 OS=Homo sapiens GN=PLIN3 PE=1 SV=3;>tr|K7ERZ3|K7ERZ3_HUMAN PeriLipin-3 (Fragment) OS=Homo sapiens GN=PLIN3 PE=4 SV=1;>tr|K7EL96|K7EL96_HUMAN PeriLipin-3 (Fragment) OS=Homo sapiens GN=PLIN3 PE=4 SV=1;>tr|K7ER39|K7ER39_HUMA	1.2792
Electron transfer flavoprotein subunit beta	ETFB	>tr|A8K766|A8K766_HUMAN cDNA FLJ77343, highLy simiLar to Homo sapiens eLectron-transfer-fLavoprotein, beta poLypeptide(ETFB), mRNA OS=Homo sapiens PE=2 SV=1;>sp|P38117|ETFB_HUMAN ELectron transfer fLavoprotein subunit beta OS=Homo sapiens GN=ETFB PE=1 SV=3	1.2802
		>tr|Q3SWV3|Q3SWV3_HUMAN LOC389833 protein (Fragment) OS=Homo sapiens GN=LOC389833 PE=2 SV=1	1.2869
Myotrophin	MTPN;DKFZp761E1322	>sp|P58546|MTPN_HUMAN Myotrophin OS=Homo sapiens GN=MTPN PE=1 SV=2;>tr|Q69YG1|Q69YG1_HUMAN Myotrophin OS=Homo sapiens GN=DKFZp761E1322 PE=2 SV=1;>tr|C9JL85|C9JL85_HUMAN Myotrophin OS=Homo sapiens GN=MTPN PE=2 SV=1	1.2887
14-3-3 protein zeta/delta	YWHAZ	>tr|E7EX29|E7EX29_HUMAN 14-3-3 protein zeta/deLta (Fragment) OS=Homo sapiens GN=YWHAZ PE=2 SV=1;>tr|D0PNI1|D0PNI1_HUMAN Tyrosine 3-monooxygenase/tryptophan 5-monooxygenase activation protein zeta poLypeptide OS=Homo sapiens GN=YWHAZ PE=2 SV=1;>sp|P63104|14	1.2932
Glutathione S-transferase omega-1	GSTO1	>tr|B2R983|B2R983_HUMAN cDNA, FLJ94267, highLy simiLar to Homo sapiens gLutathione S-transferase omega 1 (GSTO1), mRNA OS=Homo sapiens PE=2 SV=1;>sp|P78417|GSTO1_HUMAN GLutathione S-transferase omega-1 OS=Homo sapiens GN=GSTO1 PE=1 SV=2;>tr|Q5TA02|Q5TA02_H	1.2937
Triosephosphate isomerase	TPI1	>sp|P60174|TPIS_HUMAN Triosephosphate isomerase OS=Homo sapiens GN=TPI1 PE=1 SV=3;>tr|Q53HE2|Q53HE2_HUMAN Triosephosphate isomerase (Fragment) OS=Homo sapiens PE=2 SV=1;>tr|B4DUI5|B4DUI5_HUMAN Triosephosphate isomerase OS=Homo sapiens PE=2 SV=1;>tr|Q2QD09|	1.2944
2,4-dienoyl-CoA reductase, mitochondrial	DECR1;DECR	>sp|Q16698|DECR_HUMAN 2,4-dienoyL-CoA reductase, mitochondriaL OS=Homo sapiens GN=DECR1 PE=1 SV=1;>tr|B7Z6B8|B7Z6B8_HUMAN 2,4-dienoyL-CoA reductase, mitochondriaL OS=Homo sapiens GN=DECR1 PE=2 SV=1;>tr|E5RFV2|E5RFV2_HUMAN 2,4-dienoyL-CoA reductase, mitocho	1.3013
Zinc finger CCCH-type antiviral protein 1-like	ZC3HAV1L	>sp|Q96H79|ZCCHL_HUMAN Zinc finger CCCH-type antiviraL protein 1-Like OS=Homo sapiens GN=ZC3HAV1L PE=1 SV=2	1.3096
Filamin-A	FLNA	>sp|P21333|FLNA_HUMAN FiLamin-A OS=Homo sapiens GN=FLNA PE=1 SV=4;>tr|Q60FE5|Q60FE5_HUMAN FiLamin A OS=Homo sapiens GN=FLNA PE=2 SV=1;>tr|Q60FE6|Q60FE6_HUMAN FiLamin A OS=Homo sapiens GN=FLNA PE=2 SV=1;>tr|Q5HY54|Q5HY54_HUMAN FiLamin-A OS=Homo sapiens GN=F	1.312
Stathmin	STMN1	>tr|B5BU83|B5BU83_HUMAN Stathmin OS=Homo sapiens GN=STMN1 PE=2 SV=1;>sp|P16949|STMN1_HUMAN Stathmin OS=Homo sapiens GN=STMN1 PE=1 SV=3;>tr|Q96CE4|Q96CE4_HUMAN Stathmin OS=Homo sapiens GN=STMN1 PE=2 SV=1;>tr|A2A2D0|A2A2D0_HUMAN Stathmin (Fragment) OS=Homo s	1.3159
ATP synthase subunit beta, mitochondrial;ATP synthase subunit beta	ATP5B	>sp|P06576|ATPB_HUMAN ATP synthase subunit beta, mitochondriaL OS=Homo sapiens GN=ATP5B PE=1 SV=3;>tr|Q0QEN7|Q0QEN7_HUMAN ATP synthase subunit beta (Fragment) OS=Homo sapiens GN=ATP5B PE=2 SV=1;>tr|F8VPV9|F8VPV9_HUMAN ATP synthase subunit beta OS=Homo sapi	1.3175
Transformer-2 protein homolog beta	TRA2B;DKFZp686F18120	>tr|B2RDQ3|B2RDQ3_HUMAN cDNA, FLJ96718, highLy simiLar to Homo sapiens spLicing factor, arginine/serine-rich 10 (transformer 2 homoLog, DrosophiLa) (SFRS10), mRNA OS=Homo sapiens PE=2 SV=1;>sp|P62995|TRA2B_HUMAN Transformer-2 protein homoLog beta OS=Homo s	1.3232
39S ribosomal protein L12, mitochondrial	SLC25A10;MRPL12;MRPL7/L12	>tr|B4DLN1|B4DLN1_HUMAN MitochondriaL dicarboxyLate carrier OS=Homo sapiens GN=SLC25A10 PE=2 SV=1;>sp|P52815|RM12_HUMAN 39S ribosomaL protein L12, mitochondriaL OS=Homo sapiens GN=MRPL12 PE=1 SV=2;>tr|Q96Q74|Q96Q74_HUMAN MitochondriaL ribosomaL protein L7/	1.3248
Prothymosin alpha;Thymosin alpha-1	PTMA;PTMAP7	>tr|H7C2N1|H7C2N1_HUMAN Thymosin aLpha-1 (Fragment) OS=Homo sapiens GN=PTMA PE=4 SV=1;>tr|B8ZZW7|B8ZZW7_HUMAN Thymosin aLpha-1 OS=Homo sapiens GN=PTMA PE=2 SV=1;>tr|B8ZZA1|B8ZZA1_HUMAN Thymosin aLpha-1 OS=Homo sapiens GN=PTMA PE=2 SV=1;>sp|P06454|PTMA_HUMA	1.3347
Constitutive coactivator of PPAR-gamma-like protein 2	FAM120C	>sp|Q9NX05|F120C_HUMAN Constitutive coactivator of PPAR-gamma-Like protein 2 OS=Homo sapiens GN=FAM120C PE=2 SV=3	1.3348
WD repeat-containing protein 1	WDR1	>tr|Q59ER5|Q59ER5_HUMAN WD repeat-containing protein 1 isoform 1 variant (Fragment) OS=Homo sapiens PE=2 SV=1;>sp|O75083|WDR1_HUMAN WD repeat-containing protein 1 OS=Homo sapiens GN=WDR1 PE=1 SV=4;>tr|Q53GN4|Q53GN4_HUMAN WD repeat domain 1, isoform CRA_a (	1.3374
Dihydropyrimidinase-related protein 2	DPYSL2	>tr|Q59GB4|Q59GB4_HUMAN Dihydropyrimidinase-Like 2 variant (Fragment) OS=Homo sapiens PE=2 SV=1;>sp|Q16555|DPYL2_HUMAN Dihydropyrimidinase-reLated protein 2 OS=Homo sapiens GN=DPYSL2 PE=1 SV=1;>tr|Q53ET2|Q53ET2_HUMAN Dihydropyrimidinase-Like 2 variant (Fra	1.3518
High mobility group nucleosome-binding domain-containing protein 3	HMGN3	>sp|Q15651|HMGN3_HUMAN High mobiLity group nucLeosome-binding domain-containing protein 3 OS=Homo sapiens GN=HMGN3 PE=1 SV=2	1.354
40S ribosomal protein S6	RPS6	>tr|A2A3R6|A2A3R6_HUMAN 40S ribosomaL protein S6 OS=Homo sapiens GN=RPS6 PE=2 SV=1;>sp|P62753|RS6_HUMAN 40S ribosomaL protein S6 OS=Homo sapiens GN=RPS6 PE=1 SV=1;>tr|Q96DV6|Q96DV6_HUMAN 40S ribosomaL protein S6 OS=Homo sapiens GN=RPS6 PE=2 SV=1;>tr|A2A3R7	1.3549
Cysteine desulfurase, mitochondrial	NFS1	>tr|B2R5S3|B2R5S3_HUMAN cDNA, FLJ92597, highLy simiLar to Homo sapiens NFS1 nitrogen fixation 1 (S. cerevisiae) (NFS1), mRNA OS=Homo sapiens PE=2 SV=1;>tr|Q53FP3|Q53FP3_HUMAN NFS1 nitrogen fixation 1 isoform a variant (Fragment) OS=Homo sapiens PE=2 SV=1;>	1.3599
Cytochrome c	CYCS	>tr|G4XXL9|G4XXL9_HUMAN Cytochrome c OS=Homo sapiens GN=CYCS PE=2 SV=1;>sp|P99999|CYC_HUMAN Cytochrome c OS=Homo sapiens GN=CYCS PE=1 SV=2;>tr|C9JFR7|C9JFR7_HUMAN Cytochrome c (Fragment) OS=Homo sapiens GN=CYCS PE=2 SV=1;>tr|Q6LER6|Q6LER6_HUMAN Cytochrome	1.3655
Transmembrane protein 205	TMEM205	>sp|Q6UW68|TM205_HUMAN Transmembrane protein 205 OS=Homo sapiens GN=TMEM205 PE=1 SV=1;>tr|K7ELQ9|K7ELQ9_HUMAN Transmembrane protein 205 (Fragment) OS=Homo sapiens GN=TMEM205 PE=4 SV=1;>tr|K7EPR0|K7EPR0_HUMAN Transmembrane protein 205 OS=Homo sapiens GN=TME	1.3758
Glucosidase 2 subunit beta	PRKCSH	>tr|B4DJQ5|B4DJQ5_HUMAN cDNA FLJ59211, highLy simiLar to GLucosidase 2 subunit beta OS=Homo sapiens PE=2 SV=1;>tr|K7ELL7|K7ELL7_HUMAN GLucosidase 2 subunit beta OS=Homo sapiens GN=PRKCSH PE=4 SV=1;>sp|P14314|GLU2B_HUMAN GLucosidase 2 subunit beta OS=Homo s	1.3838
Transgelin-2	TAGLN2	>sp|P37802|TAGL2_HUMAN TransgeLin-2 OS=Homo sapiens GN=TAGLN2 PE=1 SV=3	1.3957
Fructose-bisphosphate aldolase A;Fructose-bisphosphate aldolase	ALDOA	>sp|P04075|ALDOA_HUMAN Fructose-bisphosphate aLdoLase A OS=Homo sapiens GN=ALDOA PE=1 SV=2;>tr|J3KPS3|J3KPS3_HUMAN Fructose-bisphosphate aLdoLase OS=Homo sapiens GN=ALDOA PE=3 SV=1;>tr|H3BQN4|H3BQN4_HUMAN Fructose-bisphosphate aLdoLase OS=Homo sapiens GN=A	1.4005
Endoplasmic reticulum resident protein 29	ERP29	>sp|P30040|ERP29_HUMAN EndopLasmic reticuLum resident protein 29 OS=Homo sapiens GN=ERP29 PE=1 SV=4;>tr|F8VY02|F8VY02_HUMAN EndopLasmic reticuLum resident protein 29 OS=Homo sapiens GN=ERP29 PE=2 SV=1	1.4041
Stathmin-2;Stathmin	STMN2	>sp|Q93045|STMN2_HUMAN Stathmin-2 OS=Homo sapiens GN=STMN2 PE=1 SV=3;>tr|B7Z4N6|B7Z4N6_HUMAN cDNA FLJ53062, highLy simiLar to Stathmin-2 OS=Homo sapiens PE=2 SV=1;>tr|E5RGX5|E5RGX5_HUMAN Stathmin OS=Homo sapiens GN=STMN2 PE=2 SV=1	1.4163
Calreticulin	CALR	>sp|P27797|CALR_HUMAN CaLreticuLin OS=Homo sapiens GN=CALR PE=1 SV=1;>tr|Q53G71|Q53G71_HUMAN CaLreticuLin variant (Fragment) OS=Homo sapiens PE=2 SV=1;>tr|B4DHR1|B4DHR1_HUMAN cDNA FLJ53009, highLy simiLar to CaLreticuLin OS=Homo sapiens PE=2 SV=1;>tr|K7EJB	1.4286
Acylphosphatase;Acylphosphatase-1	ACYP1	>tr|G3V2U7|G3V2U7_HUMAN AcyLphosphatase OS=Homo sapiens GN=ACYP1 PE=2 SV=1;>sp|P07311|ACYP1_HUMAN AcyLphosphatase-1 OS=Homo sapiens GN=ACYP1 PE=1 SV=2	1.4299
Ras-related C3 botulinum toxin substrate 2;Ras-related C3 botulinum toxin substrate 3;Ras-related C3 botulinum toxin substrate 1	RAC2;RAC1;RAC3	>sp|P15153|RAC2_HUMAN Ras-reLated C3 botuLinum toxin substrate 2 OS=Homo sapiens GN=RAC2 PE=1 SV=1;>tr|B1AH80|B1AH80_HUMAN Ras-reLated C3 botuLinum toxin substrate 2 OS=Homo sapiens GN=RAC2 PE=3 SV=1;>tr|B1AH78|B1AH78_HUMAN Ras-reLated C3 botuLinum toxin s	1.4361
Histone H2A.Z;Histone H2A.V;Histone H2A	H2AFZ;H2AFV	>sp|P0C0S5|H2AZ_HUMAN Histone H2A.Z OS=Homo sapiens GN=H2AFZ PE=1 SV=2;>sp|Q71UI9|H2AV_HUMAN Histone H2A.V OS=Homo sapiens GN=H2AFV PE=1 SV=3;>tr|C9J0D1|C9J0D1_HUMAN Histone H2A OS=Homo sapiens GN=H2AFV PE=2 SV=1	1.4758
10 kDa heat shock protein, mitochondrial	HSPE1;EPFP1	>sp|P61604|CH10_HUMAN 10 kDa heat shock protein, mitochondriaL OS=Homo sapiens GN=HSPE1 PE=1 SV=2;>tr|B8ZZL8|B8ZZL8_HUMAN 10 kDa heat shock protein, mitochondriaL OS=Homo sapiens GN=HSPE1 PE=3 SV=1;>tr|Q9UNM1|Q9UNM1_HUMAN Chaperonin 10-reLated protein (Fra	1.4771
Beta-centractin;Alpha-centractin	ACTR1B;ACTR1A	>sp|P42025|ACTY_HUMAN Beta-centractin OS=Homo sapiens GN=ACTR1B PE=1 SV=1;>sp|P61163|ACTZ_HUMAN ALpha-centractin OS=Homo sapiens GN=ACTR1A PE=1 SV=1;>tr|B4DM97|B4DM97_HUMAN cDNA FLJ55002, highLy simiLar to ALpha-centractin OS=Homo sapiens PE=2 SV=1;>tr|R4G	1.4932
Thioredoxin-dependent peroxide reductase, mitochondrial	PRDX3	>sp|P30048|PRDX3_HUMAN Thioredoxin-dependent peroxide reductase, mitochondriaL OS=Homo sapiens GN=PRDX3 PE=1 SV=3;>tr|E9PH29|E9PH29_HUMAN Thioredoxin-dependent peroxide reductase, mitochondriaL OS=Homo sapiens GN=PRDX3 PE=2 SV=1;>tr|Q53HC2|Q53HC2_HUMAN Per	1.4941
Tropomyosin alpha-4 chain;Tropomyosin beta chain	TPM4;TPM2	>sp|P67936|TPM4_HUMAN Tropomyosin aLpha-4 chain OS=Homo sapiens GN=TPM4 PE=1 SV=3;>tr|B4DVY2|B4DVY2_HUMAN cDNA FLJ54184, highLy simiLar to Tropomyosin aLpha-4 chain OS=Homo sapiens PE=2 SV=1;>tr|K7ENT6|K7ENT6_HUMAN Tropomyosin aLpha-4 chain (Fragment) OS=H	1.5008
Plastin-2	LCP1	>sp|P13796|PLSL_HUMAN PLastin-2 OS=Homo sapiens GN=LCP1 PE=1 SV=6;>tr|Q53FI1|Q53FI1_HUMAN L-pLastin variant (Fragment) OS=Homo sapiens PE=2 SV=1;>tr|Q59GX5|Q59GX5_HUMAN L-pLastin variant (Fragment) OS=Homo sapiens PE=2 SV=1	1.508
Rho-related GTP-binding protein RhoC;Transforming protein RhoA;Rho-related GTP-binding protein RhoB	RHOC;RHOA;RHOB	>tr|E9PN11|E9PN11_HUMAN Rho-reLated GTP-binding protein RhoC (Fragment) OS=Homo sapiens GN=RHOC PE=2 SV=1;>tr|Q5JR05|Q5JR05_HUMAN Rho-reLated GTP-binding protein RhoC OS=Homo sapiens GN=RHOC PE=2 SV=1;>sp|P08134|RHOC_HUMAN Rho-reLated GTP-binding protein R	1.5113
Rho GDP-dissociation inhibitor 2	ARHGDIB	>tr|B2R4F3|B2R4F3_HUMAN cDNA, FLJ92068, highLy simiLar to Homo sapiens Rho GDP dissociation inhibitor (GDI) beta (ARHGDIB),mRNA OS=Homo sapiens PE=2 SV=1;>sp|P52566|GDIR2_HUMAN Rho GDP-dissociation inhibitor 2 OS=Homo sapiens GN=ARHGDIB PE=1 SV=3;>tr|F5H3P	1.5161
Thymosin beta-4;Hematopoietic system regulatory peptide	TMSB4X	>tr|Q0P5N8|Q0P5N8_HUMAN TMSB4X protein (Fragment) OS=Homo sapiens GN=TMSB4X PE=2 SV=1;>tr|Q0P5P4|Q0P5P4_HUMAN TMSB4X protein (Fragment) OS=Homo sapiens GN=TMSB4X PE=2 SV=1;>tr|Q0P5Q0|Q0P5Q0_HUMAN TMSB4X protein (Fragment) OS=Homo sapiens GN=TMSB4X PE=2 SV=	1.5708
Aspartate aminotransferase, mitochondrial;Aspartate aminotransferase	GOT2	>sp|P00505|AATM_HUMAN Aspartate aminotransferase, mitochondriaL OS=Homo sapiens GN=GOT2 PE=1 SV=3;>tr|B4DJA6|B4DJA6_HUMAN Aspartate aminotransferase OS=Homo sapiens PE=2 SV=1;>tr|E7ERW2|E7ERW2_HUMAN Aspartate aminotransferase OS=Homo sapiens GN=GOT2 PE=2 S	1.5718
Peptidyl-prolyl cis-trans isomerase FKBP1A	FKBP1A;FKBP12-Exip3;FKBP12-Exin	>sp|P62942|FKB1A_HUMAN PeptidyL-proLyL cis-trans isomerase FKBP1A OS=Homo sapiens GN=FKBP1A PE=1 SV=2;>tr|Q1JUQ4|Q1JUQ4_HUMAN FK506 binding protein12 OS=Homo sapiens GN=FKBP12-Exip3 PE=4 SV=1;>tr|Q1JUQ3|Q1JUQ3_HUMAN FK506 binding protein12 OS=Homo sapiens	1.5756
Bifunctional 3-phosphoadenosine 5-phosphosulfate synthase 1;Sulfate adenylyltransferase;Adenylyl-sulfate kinase	PAPSS1	>sp|O43252|PAPS1_HUMAN BifunctionaL 3-phosphoadenosine 5-phosphosuLfate synthase 1 OS=Homo sapiens GN=PAPSS1 PE=1 SV=2;>tr|Q6IAX6|Q6IAX6_HUMAN 3-phosphoadenosine 5-phosphosuLfate synthase 1 OS=Homo sapiens GN=PAPSS1 PE=2 SV=1;>tr|Q05BW9|Q05BW9_HUMAN PA	1.5767
Putative annexin A2-like protein;Annexin A2;Annexin	ANXA2P2;ANXA2	>sp|A6NMY6|AXA2L_HUMAN Putative annexin A2-Like protein OS=Homo sapiens GN=ANXA2P2 PE=5 SV=2;>sp|P07355|ANXA2_HUMAN Annexin A2 OS=Homo sapiens GN=ANXA2 PE=1 SV=2;>tr|H0YN42|H0YN42_HUMAN Annexin (Fragment) OS=Homo sapiens GN=ANXA2 PE=2 SV=1;>tr|H0YMU9|H0YMU	1.587
Peroxiredoxin-4	PRDX4	>sp|Q13162|PRDX4_HUMAN Peroxiredoxin-4 OS=Homo sapiens GN=PRDX4 PE=1 SV=1;>tr|H7C3T4|H7C3T4_HUMAN Peroxiredoxin-4 (Fragment) OS=Homo sapiens GN=PRDX4 PE=4 SV=1	1.5907
ATP synthase-coupling factor 6, mitochondrial	ATP5J	>tr|A8MUH2|A8MUH2_HUMAN ATP synthase-coupLing factor 6, mitochondriaL OS=Homo sapiens GN=ATP5J PE=2 SV=1;>sp|P18859|ATP5J_HUMAN ATP synthase-coupLing factor 6, mitochondriaL OS=Homo sapiens GN=ATP5J PE=1 SV=1;>tr|Q6IB54|Q6IB54_HUMAN ATP synthase-coupLing f	1.5917
Putative coiled-coil-helix-coiled-coil-helix domain-containing protein CHCHD2P9, mitochondrial;Coiled-coil-helix-coiled-coil-helix domain-containing protein 2, mitochondrial	CHCHD2P9;CHCHD2	>sp|Q5T1J5|CHCH9_HUMAN Putative coiLed-coiL-heLix-coiLed-coiL-heLix domain-containing protein CHCHD2P9, mitochondriaL OS=Homo sapiens GN=CHCHD2P9 PE=5 SV=1;>sp|Q9Y6H1|CHCH2_HUMAN CoiLed-coiL-heLix-coiLed-coiL-heLix domain-containing protein 2, mitochondria	1.6027
ATP synthase subunit alpha, mitochondrial;ATP synthase subunit alpha	ATP5A1	>sp|P25705|ATPA_HUMAN ATP synthase subunit aLpha, mitochondriaL OS=Homo sapiens GN=ATP5A1 PE=1 SV=1;>tr|B4DY56|B4DY56_HUMAN ATP synthase subunit aLpha OS=Homo sapiens PE=2 SV=1;>tr|K7ENP3|K7ENP3_HUMAN ATP synthase subunit aLpha OS=Homo sapiens GN=ATP5A1 PE	1.6456
ERO1-like protein alpha	ERO1L	>sp|Q96HE7|ERO1A_HUMAN ERO1-Like protein aLpha OS=Homo sapiens GN=ERO1L PE=1 SV=2;>tr|G3V3E6|G3V3E6_HUMAN ERO1-Like protein aLpha OS=Homo sapiens GN=ERO1L PE=4 SV=1;>tr|G3V5B3|G3V5B3_HUMAN ERO1-Like protein aLpha (Fragment) OS=Homo sapiens GN=ERO1L PE=2 SV	1.6555
Isocitrate dehydrogenase [NADP], mitochondrial;Isocitrate dehydrogenase [NADP]	IDH2	>sp|P48735|IDHP_HUMAN Isocitrate dehydrogenase [NADP], mitochondriaL OS=Homo sapiens GN=IDH2 PE=1 SV=2;>tr|Q53GL5|Q53GL5_HUMAN Isocitrate dehydrogenase [NADP] (Fragment) OS=Homo sapiens PE=2 SV=1;>tr|Q13584|Q13584_HUMAN Isocitrate dehydrogenase [NADP] OS=H	1.7011
Histone H1.5	HIST1H1B	>sp|P16401|H15_HUMAN Histone H1.5 OS=Homo sapiens GN=HIST1H1B PE=1 SV=3	1.7063
Rap1 GTPase-GDP dissociation stimulator 1	RAP1GDS1	>tr|B3KNU0|B3KNU0_HUMAN cDNA FLJ30470 fis, cLone BRAWH1000040, highLy simiLar to Rap1 GTPase-GDP dissociation stimuLator 1 OS=Homo sapiens PE=2 SV=1;>sp|P52306|GDS1_HUMAN Rap1 GTPase-GDP dissociation stimuLator 1 OS=Homo sapiens GN=RAP1GDS1 PE=1 SV=3;>tr|B	1.7157
Synaptic vesicle membrane protein VAT-1 homolog	VAT1	>sp|Q99536|VAT1_HUMAN Synaptic vesicLe membrane protein VAT-1 homoLog OS=Homo sapiens GN=VAT1 PE=1 SV=2;>tr|B4DPX4|B4DPX4_HUMAN Chromaffin granuLe amine transporter OS=Homo sapiens GN=VAT1 PE=2 SV=1;>tr|K7ERT7|K7ERT7_HUMAN Chromaffin granuLe amine transpor	1.7335
ATP synthase subunit d, mitochondrial	ATP5H	>sp|O75947|ATP5H_HUMAN ATP synthase subunit d, mitochondriaL OS=Homo sapiens GN=ATP5H PE=1 SV=3;>tr|A0PJH2|A0PJH2_HUMAN ATP5H protein (Fragment) OS=Homo sapiens GN=ATP5H PE=2 SV=1;>tr|F5H608|F5H608_HUMAN ATP synthase subunit d, mitochondriaL OS=Homo sapien	1.7365
Glyoxylate reductase/hydroxypyruvate reductase	GRHPR	>tr|Q5M7Z5|Q5M7Z5_HUMAN GRHPR protein (Fragment) OS=Homo sapiens GN=GRHPR PE=2 SV=1;>sp|Q9UBQ7|GRHPR_HUMAN GLyoxyLate reductase/hydroxypyruvate reductase OS=Homo sapiens GN=GRHPR PE=1 SV=1	1.7406
Protein disulfide-isomerase	P4HB	>sp|P07237|PDIA1_HUMAN Protein disuLfide-isomerase OS=Homo sapiens GN=P4HB PE=1 SV=3;>tr|B4DNL5|B4DNL5_HUMAN cDNA FLJ59361, highLy simiLar to Protein disuLfide-isomerase (EC 5.3.4.1) OS=Homo sapiens PE=2 SV=1;>tr|H7BZ94|H7BZ94_HUMAN Protein disuLfide-isome	1.7428
Histone H1.3;Histone H1.4;Histone H1.2;Histone H1.1;Histone H1t	HIST1H1D;HIST1H1E;HIST1H1C;HIST1H1A;HIST1H1T	>sp|P16402|H13_HUMAN Histone H1.3 OS=Homo sapiens GN=HIST1H1D PE=1 SV=2;>tr|A3R0T7|A3R0T7_HUMAN Liver histone H1e OS=Homo sapiens PE=2 SV=1;>tr|A3R0T8|A3R0T8_HUMAN Histone 1, H1e OS=Homo sapiens GN=HIST1H1E PE=2 SV=1;>tr|B2R984|B2R984_HUMAN cDNA, FLJ94268,	1.7659
Moesin	MSN	>sp|P26038|MOES_HUMAN Moesin OS=Homo sapiens GN=MSN PE=1 SV=3;>tr|B7Z4C7|B7Z4C7_HUMAN cDNA FLJ57321, moderateLy simiLar to Moesin OS=Homo sapiens PE=2 SV=1	1.7751
Galectin-1	LGALS1	>sp|P09382|LEG1_HUMAN GaLectin-1 OS=Homo sapiens GN=LGALS1 PE=1 SV=2	1.792
Phosphoglycerate mutase 1;Phosphoglycerate mutase;Phosphoglycerate mutase 2	PGAM1;hCG_2015269;PGAM2	>sp|P18669|PGAM1_HUMAN PhosphogLycerate mutase 1 OS=Homo sapiens GN=PGAM1 PE=1 SV=2;>tr|Q53G35|Q53G35_HUMAN PhosphogLycerate mutase (Fragment) OS=Homo sapiens PE=2 SV=1;>tr|Q6FHK8|Q6FHK8_HUMAN PGAM1 protein OS=Homo sapiens GN=PGAM1 PE=2 SV=1;>tr|Q6FHU2|Q6F	1.8183
Heat shock protein beta-1	HSPB1	>sp|P04792|HSPB1_HUMAN Heat shock protein beta-1 OS=Homo sapiens GN=HSPB1 PE=1 SV=2;>tr|B4DL87|B4DL87_HUMAN cDNA FLJ52243, highLy simiLar to Heat-shock protein beta-1 OS=Homo sapiens PE=2 SV=1;>tr|C9J3N8|C9J3N8_HUMAN Heat shock protein beta-1 OS=Homo sapie	1.8319
Dynein heavy chain 1, axonemal	DNAH1	>sp|Q9P2D7|DYH1_HUMAN Dynein heavy chain 1, axonemaL OS=Homo sapiens GN=DNAH1 PE=2 SV=4	2.0583
Fructose-bisphosphate aldolase;Fructose-bisphosphate aldolase C	ALDOC	>tr|B7Z3K9|B7Z3K9_HUMAN Fructose-bisphosphate aLdoLase OS=Homo sapiens PE=2 SV=1;>sp|P09972|ALDOC_HUMAN Fructose-bisphosphate aLdoLase C OS=Homo sapiens GN=ALDOC PE=1 SV=2;>tr|B7Z1Y2|B7Z1Y2_HUMAN Fructose-bisphosphate aLdoLase OS=Homo sapiens PE=2 SV=1;>tr	2.1023
Plasma cell-induced resident endoplasmic reticulum protein	PACAP	>sp|Q8WU39|MZB1_HUMAN MarginaL zone B- and B1-ceLL-specific protein OS=Homo sapiens GN=MZB1 PE=1 SV=1;>tr|B3KQ72|B3KQ72_HUMAN cDNA FLJ32987 fis, cLone THYMU1000032 OS=Homo sapiens PE=2 SV=1	2.1143
Ezrin	EZR	>tr|B2R6J2|B2R6J2_HUMAN cDNA, FLJ92973, highLy simiLar to Homo sapiens viLLin 2 (ezrin) (VIL2), mRNA OS=Homo sapiens PE=2 SV=1;>sp|P15311|EZRI_HUMAN Ezrin OS=Homo sapiens GN=EZR PE=1 SV=4;>tr|Q6NUR7|Q6NUR7_HUMAN Ezrin OS=Homo sapiens GN=EZR PE=2 SV=1;>tr|E	2.1194
L-lactate dehydrogenase A chain;L-lactate dehydrogenase	LDHA	>sp|P00338|LDHA_HUMAN L-Lactate dehydrogenase A chain OS=Homo sapiens GN=LDHA PE=1 SV=2;>tr|B4DJI1|B4DJI1_HUMAN L-Lactate dehydrogenase OS=Homo sapiens PE=2 SV=1	2.1509
S-phase kinase-associated protein 1	SKP1	>tr|E5RJR5|E5RJR5_HUMAN S-phase kinase-associated protein 1 OS=Homo sapiens GN=SKP1 PE=2 SV=1;>sp|P63208|SKP1_HUMAN S-phase kinase-associated protein 1 OS=Homo sapiens GN=SKP1 PE=1 SV=2	2.1674
Pyruvate kinase isozymes M1/M2;Pyruvate kinase	PKM2	>sp|P14618|KPYM_HUMAN Pyruvate kinase isozymes M1/M2 OS=Homo sapiens GN=PKM PE=1 SV=4;>tr|B4DRT3|B4DRT3_HUMAN Pyruvate kinase OS=Homo sapiens PE=2 SV=1;>tr|H3BTN5|H3BTN5_HUMAN Pyruvate kinase (Fragment) OS=Homo sapiens GN=PKM PE=2 SV=1;>tr|B4DNK4|B4DNK4_HU	2.2323
Macrophage-capping protein	CAPG	>tr|B2R9S4|B2R9S4_HUMAN cDNA, FLJ94534, highLy simiLar to Homo sapiens capping protein (actin fiLament), geLsoLin-Like(CAPG), mRNA OS=Homo sapiens PE=2 SV=1;>sp|P40121|CAPG_HUMAN Macrophage-capping protein OS=Homo sapiens GN=CAPG PE=1 SV=2;>tr|B4DU58|B4DU5	2.4339
Cathepsin G	CTSG	>sp|P08311|CATG_HUMAN Cathepsin G OS=Homo sapiens GN=CTSG PE=1 SV=2	2.5278
Glucose-6-phosphate isomerase	GPI	>tr|B4DVJ0|B4DVJ0_HUMAN GLucose-6-phosphate isomerase OS=Homo sapiens PE=2 SV=1;>sp|P06744|G6PI_HUMAN GLucose-6-phosphate isomerase OS=Homo sapiens GN=GPI PE=1 SV=4;>tr|B4DE36|B4DE36_HUMAN GLucose-6-phosphate isomerase OS=Homo sapiens PE=2 SV=1	2.5774
Alpha-enolase;Enolase	ENO1	>sp|P06733|ENOA_HUMAN ALpha-enoLase OS=Homo sapiens GN=ENO1 PE=1 SV=2;>tr|E2DRY6|E2DRY6_HUMAN EnoLase OS=Homo sapiens PE=2 SV=1;>tr|Q9BT62|Q9BT62_HUMAN EnoLase (Fragment) OS=Homo sapiens GN=ENO1 PE=2 SV=1	2.6671
Phosphoglycerate kinase 1;Phosphoglycerate kinase	PGK1	>sp|P00558|PGK1_HUMAN PhosphogLycerate kinase 1 OS=Homo sapiens GN=PGK1 PE=1 SV=3;>tr|B7Z7A9|B7Z7A9_HUMAN PhosphogLycerate kinase OS=Homo sapiens GN=PGK1 PE=2 SV=1;>tr|B4E1H9|B4E1H9_HUMAN cDNA FLJ53125, highLy simiLar to PhosphogLycerate kinase 1 (EC 2.7.2	2.6674
Gamma-enolase;Enolase	ENO2	>tr|A8K3B0|A8K3B0_HUMAN cDNA FLJ77877, highLy simiLar to Human ENO2 neuron specific (gamma) enoLase OS=Homo sapiens PE=2 SV=1;>sp|P09104|ENOG_HUMAN Gamma-enoLase OS=Homo sapiens GN=ENO2 PE=1 SV=3;>tr|Q6FHV6|Q6FHV6_HUMAN ENO2 protein OS=Homo sapiens GN=ENO2	2.9336
Hematopoietic lineage cell-specific protein	HCLS1	>sp|P14317|HCLS1_HUMAN Hematopoietic Lineage ceLL-specific protein OS=Homo sapiens GN=HCLS1 PE=1 SV=3;>tr|B4DQ92|B4DQ92_HUMAN cDNA FLJ59379, highLy simiLar to Hematopoietic Lineage ceLL-specific protein OS=Homo sapiens PE=2 SV=1;>tr|E7EVW7|E7EVW7_HUMAN Hem	3.4297
Protein asunder homolog	Asun;ASUN	>sp|Q9NVM9|ASUN_HUMAN Protein asunder homoLog OS=Homo sapiens GN=ASUN PE=1 SV=2;>tr|B4DNK1|B4DNK1_HUMAN Protein asunder homoLog OS=Homo sapiens GN=ASUN PE=2 SV=1;>tr|H0YH12|H0YH12_HUMAN Protein asunder homoLog (Fragment) OS=Homo sapiens GN=ASUN PE=2 SV=1;>	3.5958
Scavenger receptor class A member 3	SCARA3	>sp|Q6AZY7|SCAR3_HUMAN Scavenger receptor cLass A member 3 OS=Homo sapiens GN=SCARA3 PE=2 SV=1	6.9509
Eukaryotic translation initiation factor 4H	LOC392647;EIF4H;WBSCR1	>tr|A4D198|A4D198_HUMAN SimiLar to mKIAA0038 protein OS=Homo sapiens GN=LOC392647 PE=4 SV=1;>sp|Q15056|IF4H_HUMAN Eukaryotic transLation initiation factor 4H OS=Homo sapiens GN=EIF4H PE=1 SV=5;>tr|Q75MU2|Q75MU2_HUMAN Putative uncharacterized protein WBSCR1	NaN
Methionine--tRNA ligase, cytoplasmic	MARS	>tr|A8K492|A8K492_HUMAN cDNA FLJ76789, highLy simiLar to Homo sapiens methionine-tRNA synthetase (MARS), mRNA OS=Homo sapiens PE=2 SV=1;>sp|P56192|SYMC_HUMAN Methionine--tRNA Ligase, cytopLasmic OS=Homo sapiens GN=MARS PE=1 SV=2;>tr|A6NC17|A6NC17_HUMAN Met	NaN
Glutaminase kidney isoform, mitochondrial	GLS	>tr|A8K132|A8K132_HUMAN cDNA FLJ75476, highLy simiLar to Homo sapiens gLutaminase (GLS), mRNA OS=Homo sapiens PE=2 SV=1;>sp|O94925|GLSK_HUMAN GLutaminase kidney isoform, mitochondriaL OS=Homo sapiens GN=GLS PE=1 SV=1;>tr|Q53TX0|Q53TX0_HUMAN Putative unchar	NaN
182 kDa tankyrase-1-binding protein	TNKS1BP1	>sp|Q9C0C2|TB182_HUMAN 182 kDa tankyrase-1-binding protein OS=Homo sapiens GN=TNKS1BP1 PE=1 SV=4;>tr|B3KXS7|B3KXS7_HUMAN cDNA FLJ45975 fis, cLone PLACE7018479, highLy simiLar to 182 kDa tankyrase 1-binding protein OS=Homo sapiens PE=2 SV=1	NaN
Polyadenylate-binding protein 2	PABPN1	>sp|Q86U42|PABP2_HUMAN PoLyadenyLate-binding protein 2 OS=Homo sapiens GN=PABPN1 PE=1 SV=3;>tr|G3V4T2|G3V4T2_HUMAN PoLyadenyLate-binding protein 2 OS=Homo sapiens GN=PABPN1 PE=2 SV=1;>tr|B4DEH8|B4DEH8_HUMAN PoLyadenyLate-binding protein 2 OS=Homo sapiens G	NaN
DCN1-like protein 2;DCN1-like protein 1	DCUN1D2;DCUN1D1	>sp|Q6PH85|DCNL2_HUMAN DCN1-Like protein 2 OS=Homo sapiens GN=DCUN1D2 PE=1 SV=1;>sp|Q96GG9|DCNL1_HUMAN DCN1-Like protein 1 OS=Homo sapiens GN=DCUN1D1 PE=1 SV=1;>tr|C9JVE2|C9JVE2_HUMAN DCN1, defective in cuLLin neddyLation 1, domain containing 1 (S. cerevis	NaN
	GDAP1L1	>tr|H0Y6A7|H0Y6A7_HUMAN GangLioside-induced differentiation-associated protein 1-Like 1 (Fragment) OS=Homo sapiens GN=GDAP1L1 PE=4 SV=1	NaN
Zinc finger CCCH domain-containing protein 7A	ZC3H7A	>sp|Q8IWR0|Z3H7A_HUMAN Zinc finger CCCH domain-containing protein 7A OS=Homo sapiens GN=ZC3H7A PE=1 SV=1;>tr|I3L2K5|I3L2K5_HUMAN Zinc finger CCCH domain-containing protein 7A (Fragment) OS=Homo sapiens GN=ZC3H7A PE=4 SV=1;>tr|Q9NXC8|Q9NXC8_HUMAN cDNA FLJ20	NaN
